# Supplementary material for: Acyl azide modification of the ubiquitin C-terminus enables DUB capture
Source: Royal Society of Chemistry journal article supplement (doi:10.1039/d2cc06496k), 2022-12-29
Supplement: d2cc06496k2.xlsx [file d2cc06496k2.xlsx]

## Sheet: raw data
C: Accession	C: Description	A1	A2	A3	C1	C2	C3	c/a	pvalue
Q04695	Keratin, type I cytoskeletal 17 OS=Homo sapiens OX=9606 GN=KRT17 PE=1 SV=2 - [K1C17_HUMAN]	1.56604e+10	1.56843e+10	1.62734e+10	2.21337e+09	2.17249e+09	2.94598e+09	0.153972	1.96302e-06
P04406	Glyceraldehyde-3-phosphate dehydrogenase OS=Homo sapiens OX=9606 GN=GAPDH PE=1 SV=3 - [G3P_HUMAN]	9.10682e+09	8.20752e+09	8.22176e+09	7.30076e+09	6.58575e+09	7.24933e+09	0.827685	0.0175471
P11498	Pyruvate carboxylase, mitochondrial OS=Homo sapiens OX=9606 GN=PC PE=1 SV=2 - [PYC_HUMAN]	1.09489e+11	8.98936e+10	9.31347e+10	2.63508e+09	3.14062e+09	2.75404e+09	0.0291597	9.84745e-05
P35908	Keratin, type II cytoskeletal 2 epidermal OS=Homo sapiens OX=9606 GN=KRT2 PE=1 SV=2 - [K22E_HUMAN]	2.19926e+10	1.72216e+10	1.89227e+10	7.85574e+09	7.68341e+09	7.54357e+09	0.397041	0.00112328
P07437	Tubulin beta chain OS=Homo sapiens OX=9606 GN=TUBB PE=1 SV=2 - [TBB5_HUMAN]	4.07626e+09	2.87696e+09	2.64826e+09	5.33818e+09	4.47891e+09	4.51507e+09	1.4927	0.0396311
P08670	Vimentin OS=Homo sapiens OX=9606 GN=VIM PE=1 SV=4 - [VIME_HUMAN]	1.3207e+07	1.28958e+07	5.37227e+06	2.36026e+09	2.37981e+09	2.52581e+09	230.846	1.32268e-06
P68371	Tubulin beta-4B chain OS=Homo sapiens OX=9606 GN=TUBB4B PE=1 SV=1 - [TBB4B_HUMAN]	3.38639e+09	2.51097e+09	2.36321e+09	4.31526e+09	3.66458e+09	3.66458e+09	1.40964	0.043149
P05787	Keratin, type II cytoskeletal 8 OS=Homo sapiens OX=9606 GN=KRT8 PE=1 SV=7 - [K2C8_HUMAN]	5.83021e+09	5.94859e+09	7.26492e+09	1.33535e+10	1.23998e+10	1.21009e+10	1.98776	0.000458703
P63244	Receptor of activated protein C kinase 1 OS=Homo sapiens OX=9606 GN=RACK1 PE=1 SV=3 - [RACK1_HUMAN]	1.38535e+09	1.25436e+09	1.14001e+09	1.36656e+09	1.27398e+09	1.39131e+09	1.06671	0.349301
P22061	Protein-L-isoaspartate(D-aspartate) O-methyltransferase OS=Homo sapiens OX=9606 GN=PCMT1 PE=1 SV=4 - [PIMT_HUMAN]	6.6615e+09	4.68792e+09	4.40838e+09	2.6424e+09	2.72782e+09	3.40569e+09	0.556925	0.0359753
P23396	40S ribosomal protein S3 OS=Homo sapiens OX=9606 GN=RPS3 PE=1 SV=2 - [RS3_HUMAN]	1.13117e+10	9.7422e+09	7.81988e+09	1.12087e+10	1.27396e+10	1.10452e+10	1.21195	0.149375
P02538	Keratin, type II cytoskeletal 6A OS=Homo sapiens OX=9606 GN=KRT6A PE=1 SV=3 - [K2C6A_HUMAN]	2.05511e+10	1.69281e+10	1.88926e+10	2.73198e+09	2.5485e+09	3.09502e+09	0.148576	0.000112049
P05783	Keratin, type I cytoskeletal 18 OS=Homo sapiens OX=9606 GN=KRT18 PE=1 SV=2 - [K1C18_HUMAN]	1.11808e+10	7.60597e+06	8.74726e+06	8.38231e+09	9.06148e+09	8.27722e+09	2.29711	0.264343
P08779	Keratin, type I cytoskeletal 16 OS=Homo sapiens OX=9606 GN=KRT16 PE=1 SV=4 - [K1C16_HUMAN]	1.61219e+10	1.74378e+10	1.75226e+10	2.16827e+09	2.13073e+09	2.94598e+09	0.14183	9.95454e-06
Q15365	Poly(rC)-binding protein 1 OS=Homo sapiens OX=9606 GN=PCBP1 PE=1 SV=2 - [PCBP1_HUMAN]	1.97787e+09	1.94632e+09	1.70037e+09	1.97103e+09	1.76473e+09	1.95335e+09	1.01148	0.854178
P04350	Tubulin beta-4A chain OS=Homo sapiens OX=9606 GN=TUBB4A PE=1 SV=2 - [TBB4A_HUMAN]	3.14301e+09	2.48362e+09	2.36321e+09	4.31526e+09	3.34857e+09	3.40616e+09	1.38551	0.0604793
Q13085	Acetyl-CoA carboxylase 1 OS=Homo sapiens OX=9606 GN=ACACA PE=1 SV=2 - [ACACA_HUMAN]	1.97838e+10	1.62949e+10	1.60327e+10	6.94211e+08	4.68379e+08	5.3937e+08	0.03266	0.000156349
Q9BQE3	Tubulin alpha-1C chain OS=Homo sapiens OX=9606 GN=TUBA1C PE=1 SV=1 - [TBA1C_HUMAN]	4.89343e+09	3.79644e+09	3.45778e+09	6.78311e+09	5.51686e+09	5.02926e+09	1.42655	0.0637028
P04259	Keratin, type II cytoskeletal 6B OS=Homo sapiens OX=9606 GN=KRT6B PE=1 SV=5 - [K2C6B_HUMAN]	2.31228e+10	1.77611e+10	1.95602e+10	4.75336e+09	4.4292e+09	5.02264e+09	0.235014	0.000625866
P35527	Keratin, type I cytoskeletal 9 OS=Homo sapiens OX=9606 GN=KRT9 PE=1 SV=3 - [K1C9_HUMAN]	8.17686e+09	4.88327e+09	5.34818e+09	4.28694e+09	3.30133e+09	3.63523e+09	0.609697	0.0886049
Q13501	Sequestosome-1 OS=Homo sapiens OX=9606 GN=SQSTM1 PE=1 SV=1 - [SQSTM_HUMAN]	8.65602e+07	1.52401e+08	1.33772e+08	3.0933e+09	2.53054e+09	2.95068e+09	23.0044	8.7522e-05
P68104	Elongation factor 1-alpha 1 OS=Homo sapiens OX=9606 GN=EEF1A1 PE=1 SV=1 - [EF1A1_HUMAN]	1.31569e+10	1.15214e+10	1.09075e+10	1.56712e+10	1.48722e+10	1.27237e+10	1.21585	0.0817464
P61247	40S ribosomal protein S3a OS=Homo sapiens OX=9606 GN=RPS3A PE=1 SV=2 - [RS3A_HUMAN]	1.5961e+09	1.48046e+09	1.36874e+09	9.45826e+08	1.10845e+09	1.11392e+09	0.712708	0.00767398
P32119	Peroxiredoxin-2 OS=Homo sapiens OX=9606 GN=PRDX2 PE=1 SV=5 - [PRDX2_HUMAN]	1.55676e+09	1.49884e+09	1.47299e+09	4.02209e+09	4.54206e+09	4.69507e+09	2.92789	0.000143438
P60709	Actin, cytoplasmic 1 OS=Homo sapiens OX=9606 GN=ACTB PE=1 SV=1 - [ACTB_HUMAN]	5.06284e+09	7.59551e+09	7.49302e+09	1.66534e+10	1.45007e+10	1.62351e+10	2.35166	0.00101287
P02533	Keratin, type I cytoskeletal 14 OS=Homo sapiens OX=9606 GN=KRT14 PE=1 SV=4 - [K1C14_HUMAN]	1.61219e+10	1.74378e+10	1.75226e+10	2.16827e+09	2.13073e+09	2.94598e+09	0.14183	9.95454e-06
Q06830	Peroxiredoxin-1 OS=Homo sapiens OX=9606 GN=PRDX1 PE=1 SV=1 - [PRDX1_HUMAN]	3.40947e+09	3.00705e+09	2.8682e+09	7.95933e+09	9.10745e+09	9.12135e+09	2.82056	0.000175018
Q96RQ3	Methylcrotonoyl-CoA carboxylase subunit alpha, mitochondrial OS=Homo sapiens OX=9606 GN=MCCC1 PE=1 SV=3 - [MCCA_HUMAN]	9.9932e+09	9.78687e+09	9.69168e+09	3.07732e+08	3.97699e+08	3.20845e+08	0.0348223	5.62361e-08
P14618	Pyruvate kinase PKM OS=Homo sapiens OX=9606 GN=PKM PE=1 SV=4 - [KPYM_HUMAN]	1.45533e+09	1.42855e+09	1.2282e+09	2.00924e+09	1.69249e+09	1.71647e+09	1.31763	0.0249718
P02545	Prelamin-A/C OS=Homo sapiens OX=9606 GN=LMNA PE=1 SV=1 - [LMNA_HUMAN]	5.97196e+07	6.62584e+07	7.92002e+07	9.64229e+08	9.24309e+08	7.8608e+08	13.0356	0.00011021
P05165	Propionyl-CoA carboxylase alpha chain, mitochondrial OS=Homo sapiens OX=9606 GN=PCCA PE=1 SV=4 - [PCCA_HUMAN]	5.22723e+09	5.69599e+09	5.50006e+09	7.36217e+06	8.89584e+06	1.16603e+07	0.00169992	2.28683e-06
P62249	40S ribosomal protein S16 OS=Homo sapiens OX=9606 GN=RPS16 PE=1 SV=2 - [RS16_HUMAN]	2.41621e+09	3.17608e+09	4.56677e+08	1.04525e+09	2.65801e+09	1.72889e+09	0.898029	0.836756
P48047	ATP synthase subunit O, mitochondrial OS=Homo sapiens OX=9606 GN=ATP5PO PE=1 SV=1 - [ATPO_HUMAN]	2.5882e+09	2.51672e+09	1.97239e+09	1.55256e+09	1.98309e+09	1.89087e+09	0.766747	0.0787198
P23528	Cofilin-1 OS=Homo sapiens OX=9606 GN=CFL1 PE=1 SV=3 - [COF1_HUMAN]	7.08504e+08	3.25865e+08	2.11723e+08	1.35205e+09	1.01801e+09	1.74914e+09	3.30569	0.0209504
P62979	Ubiquitin-40S ribosomal protein S27a OS=Homo sapiens OX=9606 GN=RPS27A PE=1 SV=2 - [RS27A_HUMAN]	4.49602e+09	3.54982e+09	3.91944e+09	1.04412e+11	9.75079e+10	1.13052e+11	26.3239	2.34357e-05
P04264	Keratin, type II cytoskeletal 1 OS=Homo sapiens OX=9606 GN=KRT1 PE=1 SV=6 - [K2C1_HUMAN]	2.24796e+10	1.62183e+10	1.80565e+10	1.06616e+10	9.86724e+09	9.60874e+09	0.531017	0.00926079
O43684	Mitotic checkpoint protein BUB3 OS=Homo sapiens OX=9606 GN=BUB3 PE=1 SV=1 - [BUB3_HUMAN]	1.22124e+09	1.30844e+09	1.57937e+09	9.21494e+08	9.22069e+08	1.05215e+09	0.704718	0.0253737
P04792	Heat shock protein beta-1 OS=Homo sapiens OX=9606 GN=HSPB1 PE=1 SV=2 - [HSPB1_HUMAN]	6.13505e+08	4.79315e+08	4.9922e+08	1.78531e+08	2.1763e+08	2.06548e+08	0.378576	0.00160913
P00338	L-lactate dehydrogenase A chain OS=Homo sapiens OX=9606 GN=LDHA PE=1 SV=2 - [LDHA_HUMAN]	9.59894e+08	9.04284e+08	8.4478e+08	1.27743e+09	1.41897e+09	1.33113e+09	1.48675	0.00115249
P62701	40S ribosomal protein S4, X isoform OS=Homo sapiens OX=9606 GN=RPS4X PE=1 SV=2 - [RS4X_HUMAN]	5.77951e+09	5.34225e+09	5.3556e+09	6.20335e+09	5.39733e+09	5.13067e+09	1.01541	0.82222
P22626	Heterogeneous nuclear ribonucleoproteins A2/B1 OS=Homo sapiens OX=9606 GN=HNRNPA2B1 PE=1 SV=2 - [ROA2_HUMAN]	7.20367e+06	6.38874e+06	1.0968e+07	1.79334e+09	2.02265e+09	2.01929e+09	237.589	1.40015e-05
P08708	40S ribosomal protein S17 OS=Homo sapiens OX=9606 GN=RPS17 PE=1 SV=2 - [RS17_HUMAN]	3.55352e+09	1.63359e+09	6.01338e+08	1.21146e+09	1.26958e+09	2.03052e+09	0.779407	0.662399
P13645	Keratin, type I cytoskeletal 10 OS=Homo sapiens OX=9606 GN=KRT10 PE=1 SV=6 - [K1C10_HUMAN]	1.14292e+10	8.53356e+09	1.0307e+10	5.19977e+09	5.76031e+09	5.04253e+09	0.528668	0.00546103
P04075	Fructose-bisphosphate aldolase A OS=Homo sapiens OX=9606 GN=ALDOA PE=1 SV=2 - [ALDOA_HUMAN]	2.56805e+08	4.91222e+08	4.02719e+08	3.23368e+08	3.71632e+08	3.08138e+08	0.871727	0.526291
P62906	60S ribosomal protein L10a OS=Homo sapiens OX=9606 GN=RPL10A PE=1 SV=2 - [RL10A_HUMAN]	6.43694e+08	8.3877e+08	9.06794e+08	4.8295e+08	3.15508e+08	3.95198e+08	0.499593	0.0125583
P22087	rRNA 2'-O-methyltransferase fibrillarin OS=Homo sapiens OX=9606 GN=FBL PE=1 SV=2 - [FBRL_HUMAN]	6.80187e+06	9.65537e+06	3.78746e+06	8.27739e+08	9.30674e+08	1.05435e+09	138.938	0.000142617
P21291	Cysteine and glycine-rich protein 1 OS=Homo sapiens OX=9606 GN=CSRP1 PE=1 SV=3 - [CSRP1_HUMAN]	6.89976e+09	5.99079e+09	7.67756e+09	4.98139e+09	5.10513e+09	5.48293e+09	0.75697	0.0309154
P62280	40S ribosomal protein S11 OS=Homo sapiens OX=9606 GN=RPS11 PE=1 SV=3 - [RS11_HUMAN]	6.4771e+09	5.1225e+09	6.00743e+09	5.63473e+09	5.38986e+09	5.5364e+09	0.94059	0.436192
P13647	Keratin, type II cytoskeletal 5 OS=Homo sapiens OX=9606 GN=KRT5 PE=1 SV=3 - [K2C5_HUMAN]	1.88181e+10	1.42733e+10	1.54834e+10	2.73198e+09	2.5485e+09	3.05622e+09	0.171626	0.000604872
P49411	Elongation factor Tu, mitochondrial OS=Homo sapiens OX=9606 GN=TUFM PE=1 SV=2 - [EFTU_HUMAN]	7.91328e+08	6.44945e+08	5.58507e+08	8.8721e+08	8.71303e+08	8.63547e+08	1.31446	0.0376137
P13639	Elongation factor 2 OS=Homo sapiens OX=9606 GN=EEF2 PE=1 SV=4 - [EF2_HUMAN]	4.68281e+08	4.56456e+08	5.02692e+08	2.39321e+09	2.57121e+09	1.90878e+09	4.81509	0.000792293
Q13162	Peroxiredoxin-4 OS=Homo sapiens OX=9606 GN=PRDX4 PE=1 SV=1 - [PRDX4_HUMAN]	4.5064e+08	2.98116e+08	2.41224e+08	6.53087e+08	1.26729e+09	1.22099e+09	3.17316	0.025766
P68366	Tubulin alpha-4A chain OS=Homo sapiens OX=9606 GN=TUBA4A PE=1 SV=1 - [TBA4A_HUMAN]	3.52848e+09	3.13149e+09	2.82304e+09	5.17998e+09	4.61857e+09	4.07909e+09	1.46342	0.0178738
Q9BVA1	Tubulin beta-2B chain OS=Homo sapiens OX=9606 GN=TUBB2B PE=1 SV=1 - [TBB2B_HUMAN]	3.00642e+09	2.29349e+09	2.08529e+09	3.83559e+09	3.25475e+09	3.10662e+09	1.38073	0.0583549
P32969	60S ribosomal protein L9 OS=Homo sapiens OX=9606 GN=RPL9 PE=1 SV=1 - [RL9_HUMAN]	5.02936e+08	1.73321e+09	1.81183e+09	1.78651e+09	2.08659e+09	1.92592e+09	1.43257	0.248555
Q99714	3-hydroxyacyl-CoA dehydrogenase type-2 OS=Homo sapiens OX=9606 GN=HSD17B10 PE=1 SV=3 - [HCD2_HUMAN]	1.17054e+08	5.98563e+07	6.51653e+07	1.89813e+08	1.95081e+08	2.23795e+08	2.51446	0.00440312
P62829	60S ribosomal protein L23 OS=Homo sapiens OX=9606 GN=RPL23 PE=1 SV=1 - [RL23_HUMAN]	4.4877e+08	6.04011e+08	9.12803e+07	2.23407e+08	6.96815e+08	1.15435e+08	0.905246	0.884926
P49915	GMP synthase [glutamine-hydrolyzing] OS=Homo sapiens OX=9606 GN=GMPS PE=1 SV=1 - [GUAA_HUMAN]	8.9571e+06	1.51236e+07	6.72033e+06	4.34626e+08	4.73602e+08	3.78207e+08	41.766	0.000113503
P62987	Ubiquitin-60S ribosomal protein L40 OS=Homo sapiens OX=9606 GN=UBA52 PE=1 SV=2 - [RL40_HUMAN]	4.49602e+09	3.54982e+09	3.91944e+09	1.04412e+11	9.75079e+10	1.13052e+11	26.3239	2.34357e-05
P62241	40S ribosomal protein S8 OS=Homo sapiens OX=9606 GN=RPS8 PE=1 SV=2 - [RS8_HUMAN]	2.76461e+08	2.34417e+08	1.29655e+08	6.43248e+08	5.94541e+08	7.0171e+08	3.02795	0.00126911
P61960	Ubiquitin-fold modifier 1 OS=Homo sapiens OX=9606 GN=UFM1 PE=1 SV=1 - [UFM1_HUMAN]	1.66902e+07	1.00961e+07	4.55052e+06	1.34955e+08	2.31141e+08	9.01547e+07	14.5595	0.0274421
P14866	Heterogeneous nuclear ribonucleoprotein L OS=Homo sapiens OX=9606 GN=HNRNPL PE=1 SV=2 - [HNRPL_HUMAN]	4.9165e+06	2.9072e+06	7.15688e+06	5.57811e+08	5.49369e+08	4.80879e+08	106.008	2.76844e-05
P61978	Heterogeneous nuclear ribonucleoprotein K OS=Homo sapiens OX=9606 GN=HNRNPK PE=1 SV=1 - [HNRPK_HUMAN]	1.97079e+08	1.35104e+08	1.13948e+08	1.26343e+09	1.09988e+09	1.12369e+09	7.81609	5.78828e-05
P10809	60 kDa heat shock protein, mitochondrial OS=Homo sapiens OX=9606 GN=HSPD1 PE=1 SV=2 - [CH60_HUMAN]	3.4067e+08	3.3888e+08	3.08608e+08	7.7472e+08	7.10421e+08	7.88317e+08	2.3007	8.15791e-05
P61513	60S ribosomal protein L37a OS=Homo sapiens OX=9606 GN=RPL37A PE=1 SV=2 - [RL37A_HUMAN]	3.83407e+08	3.72612e+08	1.90458e+08	2.77344e+08	6.41512e+08	2.16066e+08	1.1991	0.690759
P18621	60S ribosomal protein L17 OS=Homo sapiens OX=9606 GN=RPL17 PE=1 SV=3 - [RL17_HUMAN]	8.9611e+08	6.45392e+08	7.85971e+08	7.98767e+08	8.57463e+08	7.74398e+08	1.04432	0.676857
P62805	Histone H4 OS=Homo sapiens OX=9606 GN=H4C1 PE=1 SV=2 - [H4_HUMAN]	4.45462e+07	3.9537e+07	4.51086e+07	7.63843e+08	8.46346e+09	1.13678e+09	80.2224	0.245143
P60174	Triosephosphate isomerase OS=Homo sapiens OX=9606 GN=TPI1 PE=1 SV=4 - [TPIS_HUMAN]	1.68912e+08	1.18179e+08	7.86531e+07	9.07818e+07	9.49589e+07	1.21417e+08	0.839816	0.521504
P26368	Splicing factor U2AF 65 kDa subunit OS=Homo sapiens OX=9606 GN=U2AF2 PE=1 SV=4 - [U2AF2_HUMAN]	7.43316e+08	5.90475e+08	5.44441e+08	9.77553e+08	8.798e+08	9.57236e+08	1.49853	0.00964036
P07355	Annexin A2 OS=Homo sapiens OX=9606 GN=ANXA2 PE=1 SV=2 - [ANXA2_HUMAN]	8.39293e+08	6.1713e+08	8.36564e+08	1.04525e+09	1.087e+09	1.11477e+09	1.41606	0.0140714
O00571	ATP-dependent RNA helicase DDX3X OS=Homo sapiens OX=9606 GN=DDX3X PE=1 SV=3 - [DDX3X_HUMAN]	1.07441e+09	8.09244e+08	7.55785e+08	1.64347e+09	1.23529e+09	9.94503e+08	1.46746	0.126341
Q6P1X5	Transcription initiation factor TFIID subunit 2 OS=Homo sapiens OX=9606 GN=TAF2 PE=1 SV=3 - [TAF2_HUMAN]	8.46128e+08	7.41515e+08	7.18543e+08	6.71667e+09	7.78419e+09	5.15027e+09	8.52105	0.00164981
P62081	40S ribosomal protein S7 OS=Homo sapiens OX=9606 GN=RPS7 PE=1 SV=1 - [RS7_HUMAN]	2.05022e+08	6.86949e+07	1.53749e+08	2.70303e+08	3.46985e+08	3.12266e+08	2.17457	0.0212633
P23284	Peptidyl-prolyl cis-trans isomerase B OS=Homo sapiens OX=9606 GN=PPIB PE=1 SV=2 - [PPIB_HUMAN]	3.20622e+08	5.16047e+07	9.38465e+07	1.31903e+08	2.04128e+08	1.37895e+08	1.01685	0.977354
P06733	Alpha-enolase OS=Homo sapiens OX=9606 GN=ENO1 PE=1 SV=2 - [ENOA_HUMAN]	3.85085e+08	2.27265e+08	2.21925e+08	4.39321e+08	3.36586e+08	3.23278e+08	1.31753	0.245097
Q9P258	Protein RCC2 OS=Homo sapiens OX=9606 GN=RCC2 PE=1 SV=2 - [RCC2_HUMAN]	2.20729e+08	2.04171e+08	2.29147e+08	4.9505e+08	4.41427e+08	4.28702e+08	2.08728	0.00039266
P62266	40S ribosomal protein S23 OS=Homo sapiens OX=9606 GN=RPS23 PE=1 SV=3 - [RS23_HUMAN]	5.87931e+09	4.17231e+09	1.97239e+09	3.79539e+09	3.4251e+09	4.68694e+09	0.990304	0.975538
O00567	Nucleolar protein 56 OS=Homo sapiens OX=9606 GN=NOP56 PE=1 SV=4 - [NOP56_HUMAN]	8.9882e+06	6.1647e+06	7.41595e+06	8.85612e+08	9.38772e+08	8.22135e+08	117.264	1.31305e-05
Q13356	RING-type E3 ubiquitin-protein ligase PPIL2 OS=Homo sapiens OX=9606 GN=PPIL2 PE=1 SV=1 - [PPIL2_HUMAN]	2.72863e+08	2.06419e+08	2.07035e+08	2.48006e+08	2.03803e+08	1.96425e+08	0.944511	0.666145
Q14980	Nuclear mitotic apparatus protein 1 OS=Homo sapiens OX=9606 GN=NUMA1 PE=1 SV=2 - [NUMA1_HUMAN]	8.96579e+06	5.19467e+06	4.36092e+06	4.42806e+08	4.62764e+08	5.23676e+08	77.1674	4.24736e-05
P07910	Heterogeneous nuclear ribonucleoproteins C1/C2 OS=Homo sapiens OX=9606 GN=HNRNPC PE=1 SV=4 - [HNRPC_HUMAN]	1.19012e+07	4.39826e+06	5.33072e+06	3.54098e+09	3.4758e+09	3.21061e+09	472.83	4.64449e-06
P62269	40S ribosomal protein S18 OS=Homo sapiens OX=9606 GN=RPS18 PE=1 SV=3 - [RS18_HUMAN]	3.35608e+08	2.19539e+08	5.46531e+07	1.66992e+08	1.86022e+08	2.48833e+08	0.986958	0.976663
Q08J23	RNA cytosine C(5)-methyltransferase NSUN2 OS=Homo sapiens OX=9606 GN=NSUN2 PE=1 SV=2 - [NSUN2_HUMAN]	6.2683e+08	4.07804e+08	3.86448e+08	5.4914e+08	5.23096e+08	4.18572e+08	1.04907	0.801587
P29401	Transketolase OS=Homo sapiens OX=9606 GN=TKT PE=1 SV=3 - [TKT_HUMAN]	7.02002e+08	6.66117e+08	5.45385e+08	1.03954e+09	9.79113e+08	7.9755e+08	1.47175	0.0256491
P25205	DNA replication licensing factor MCM3 OS=Homo sapiens OX=9606 GN=MCM3 PE=1 SV=3 - [MCM3_HUMAN]	6.00963e+08	2.86369e+08	4.71277e+08	6.71262e+08	6.40179e+08	4.66273e+08	1.30848	0.277952
P63173	60S ribosomal protein L38 OS=Homo sapiens OX=9606 GN=RPL38 PE=1 SV=2 - [RL38_HUMAN]	7.17349e+08	4.12409e+08	1.83309e+08	1.42927e+08	6.69403e+08	3.83566e+08	0.910766	0.865903
P35579	Myosin-9 OS=Homo sapiens OX=9606 GN=MYH9 PE=1 SV=4 - [MYH9_HUMAN]	6.85047e+07	6.53281e+07	5.40054e+07	8.92205e+08	9.77824e+08	1.44698e+09	17.6589	0.00377306
Q8WUA2	Peptidyl-prolyl cis-trans isomerase-like 4 OS=Homo sapiens OX=9606 GN=PPIL4 PE=1 SV=1 - [PPIL4_HUMAN]	1.38065e+09	1.43172e+09	1.31882e+09	1.38535e+09	1.45644e+09	1.70923e+09	1.10162	0.247951
O76021	Ribosomal L1 domain-containing protein 1 OS=Homo sapiens OX=9606 GN=RSL1D1 PE=1 SV=3 - [RL1D1_HUMAN]	7.98466e+06	3.8708e+06	7.28855e+06	4.33333e+08	4.12781e+08	4.11723e+08	65.7039	5.37691e-07
Q04323	UBX domain-containing protein 1 OS=Homo sapiens OX=9606 GN=UBXN1 PE=1 SV=2 - [UBXN1_HUMAN]	5.2044e+06	5.53634e+06	3.05915e+06	1.56969e+08	1.79773e+08	1.26688e+08	33.5821	0.000623366
P08238	Heat shock protein HSP 90-beta OS=Homo sapiens OX=9606 GN=HSP90AB1 PE=1 SV=4 - [HS90B_HUMAN]	8.56988e+08	8.21793e+08	6.82569e+08	1.4617e+09	1.61793e+09	1.26413e+09	1.83952	0.00460251
P15374	Ubiquitin carboxyl-terminal hydrolase isozyme L3 OS=Homo sapiens OX=9606 GN=UCHL3 PE=1 SV=1 - [UCHL3_HUMAN]	7.79058e+06	9.21448e+07	7.09205e+07	1.81375e+08	2.51677e+08	2.59256e+08	4.052	0.00802327
P31327	Carbamoyl-phosphate synthase [ammonia], mitochondrial OS=Homo sapiens OX=9606 GN=CPS1 PE=1 SV=2 - [CPSM_HUMAN]	9.40335e+08	6.30403e+08	6.47139e+08	9.43077e+08	1.03372e+09	1.02204e+09	1.35212	0.0675542
Q8TDN6	Ribosome biogenesis protein BRX1 homolog OS=Homo sapiens OX=9606 GN=BRIX1 PE=1 SV=2 - [BRX1_HUMAN]	7.40927e+06	4.64259e+06	3.14036e+06	2.93442e+08	2.5327e+08	2.23005e+08	50.6652	0.000250535
Q9BVJ6	U3 small nucleolar RNA-associated protein 14 homolog A OS=Homo sapiens OX=9606 GN=UTP14A PE=1 SV=1 - [UT14A_HUMAN]	2.32685e+08	1.52021e+08	1.60145e+08	2.68715e+08	2.65954e+08	2.40857e+08	1.42337	0.0471415
P00966	Argininosuccinate synthase OS=Homo sapiens OX=9606 GN=ASS1 PE=1 SV=2 - [ASSY_HUMAN]	2.60102e+08	2.49489e+08	2.48092e+08	2.68547e+08	2.52464e+08	2.40223e+08	1.00469	0.902088
Q96S55	ATPase WRNIP1 OS=Homo sapiens OX=9606 GN=WRNIP1 PE=1 SV=2 - [WRIP1_HUMAN]	1.31367e+07	8.62863e+06	6.78445e+06	1.21062e+09	1.38967e+09	1.14858e+09	131.31	6.77935e-05
P62913	60S ribosomal protein L11 OS=Homo sapiens OX=9606 GN=RPL11 PE=1 SV=2 - [RL11_HUMAN]	4.04446e+09	2.82499e+09	2.90321e+09	2.69773e+09	3.10705e+09	3.1489e+09	0.916197	0.550747
P33993	DNA replication licensing factor MCM7 OS=Homo sapiens OX=9606 GN=MCM7 PE=1 SV=4 - [MCM7_HUMAN]	1.80268e+09	1.35806e+09	2.92001e+08	4.43482e+08	1.12798e+09	1.12947e+09	0.782258	0.644526
P27635	60S ribosomal protein L10 OS=Homo sapiens OX=9606 GN=RPL10 PE=1 SV=5 - [RL10_HUMAN]	4.31086e+08	4.44837e+08	4.06196e+08	5.0858e+08	3.60819e+08	5.49674e+08	1.10682	0.478403
P09651	Heterogeneous nuclear ribonucleoprotein A1 OS=Homo sapiens OX=9606 GN=HNRNPA1 PE=1 SV=5 - [ROA1_HUMAN]	6.30778e+06	1.0466e+07	1.42929e+07	1.47442e+09	1.50165e+09	1.70603e+09	150.711	2.92643e-05
P62854	40S ribosomal protein S26 OS=Homo sapiens OX=9606 GN=RPS26 PE=1 SV=3 - [RS26_HUMAN]	4.75906e+08	4.39443e+08	1.69264e+08	2.62383e+08	5.4994e+08	4.02692e+08	1.12023	0.750235
Q9Y383	Putative RNA-binding protein Luc7-like 2 OS=Homo sapiens OX=9606 GN=LUC7L2 PE=1 SV=2 - [LC7L2_HUMAN]	1.34066e+09	1.57915e+09	1.6412e+09	2.63691e+09	2.04422e+09	2.10577e+09	1.48802	0.0238924
Q96FW1	Ubiquitin thioesterase OTUB1 OS=Homo sapiens OX=9606 GN=OTUB1 PE=1 SV=2 - [OTUB1_HUMAN]	1.3932e+07	5.72006e+06	2.79245e+06	2.39023e+09	2.16918e+09	2.19428e+09	300.906	5.63303e-06
P46782	40S ribosomal protein S5 OS=Homo sapiens OX=9606 GN=RPS5 PE=1 SV=4 - [RS5_HUMAN]	1.63447e+10	9.92349e+09	9.24099e+09	7.43044e+09	7.33526e+09	1.09423e+10	0.723983	0.270171
P12236	ADP/ATP translocase 3 OS=Homo sapiens OX=9606 GN=SLC25A6 PE=1 SV=4 - [ADT3_HUMAN]	1.84069e+09	1.27655e+09	1.11593e+09	1.49583e+09	1.49676e+09	1.23349e+09	0.998327	0.992516
Q14498	RNA-binding protein 39 OS=Homo sapiens OX=9606 GN=RBM39 PE=1 SV=2 - [RBM39_HUMAN]	2.04167e+09	1.5315e+09	1.44438e+09	3.14737e+09	2.88855e+09	2.835e+09	1.76798	0.00360328
Q9Y450	HBS1-like protein OS=Homo sapiens OX=9606 GN=HBS1L PE=1 SV=1 - [HBS1L_HUMAN]	6.31071e+07	6.73665e+06	3.15295e+07	4.98943e+08	4.4459e+08	3.7536e+08	13.0103	0.00049646
O43143	ATP-dependent RNA helicase DHX15 OS=Homo sapiens OX=9606 GN=DHX15 PE=1 SV=2 - [DHX15_HUMAN]	1.40384e+08	1.17811e+08	1.52719e+08	4.62251e+08	4.77061e+08	4.02524e+08	3.2655	0.000241051
Q16527	Cysteine and glycine-rich protein 2 OS=Homo sapiens OX=9606 GN=CSRP2 PE=1 SV=3 - [CSRP2_HUMAN]	2.97476e+08	2.67192e+08	2.84391e+08	2.04567e+08	1.84789e+08	2.03492e+08	0.698242	0.0014174
P45974	Ubiquitin carboxyl-terminal hydrolase 5 OS=Homo sapiens OX=9606 GN=USP5 PE=1 SV=2 - [UBP5_HUMAN]	2.85206e+07	1.10596e+07	4.64324e+06	8.99719e+08	9.52471e+08	9.26297e+08	62.8284	6.9381e-07
Q14847	LIM and SH3 domain protein 1 OS=Homo sapiens OX=9606 GN=LASP1 PE=1 SV=2 - [LASP1_HUMAN]	6.23969e+08	3.99661e+08	6.89034e+08	4.42745e+08	5.2335e+08	3.64767e+08	0.777071	0.267517
O43707	Alpha-actinin-4 OS=Homo sapiens OX=9606 GN=ACTN4 PE=1 SV=2 - [ACTN4_HUMAN]	2.64397e+07	1.98124e+07	4.39704e+06	4.01465e+08	9.47795e+08	4.99808e+08	36.5074	0.0235275
P21333	Filamin-A OS=Homo sapiens OX=9606 GN=FLNA PE=1 SV=4 - [FLNA_HUMAN]	1.21333e+08	7.82398e+07	8.47377e+07	5.24657e+08	4.69451e+08	4.68087e+08	5.14295	6.85841e-05
Q9NR30	Nucleolar RNA helicase 2 OS=Homo sapiens OX=9606 GN=DDX21 PE=1 SV=5 - [DDX21_HUMAN]	1.01981e+07	1.24825e+07	8.30414e+06	7.94901e+08	8.47889e+08	6.54265e+08	74.1351	0.00019771
P20700	Lamin-B1 OS=Homo sapiens OX=9606 GN=LMNB1 PE=1 SV=2 - [LMNB1_HUMAN]	1.78943e+07	8.99443e+06	2.36613e+06	4.61706e+08	3.88086e+08	3.78023e+08	41.9696	0.000117211
P68431	Histone H3.1 OS=Homo sapiens OX=9606 GN=H3C1 PE=1 SV=2 - [H31_HUMAN]	7.87567e+07	7.04111e+07	2.79226e+06	4.96002e+09	5.89523e+09	6.35128e+09	113.231	0.000157139
P05141	ADP/ATP translocase 2 OS=Homo sapiens OX=9606 GN=SLC25A5 PE=1 SV=7 - [ADT2_HUMAN]	1.97239e+09	1.27655e+09	1.11709e+09	1.56206e+09	1.54751e+09	1.31973e+09	1.01449	0.942358
Q9Y2X3	Nucleolar protein 58 OS=Homo sapiens OX=9606 GN=NOP58 PE=1 SV=1 - [NOP58_HUMAN]	7.98079e+06	5.57523e+06	6.02362e+06	6.84796e+08	6.5268e+08	7.71986e+08	107.738	4.04458e-05
P01116	GTPase KRas OS=Homo sapiens OX=9606 GN=KRAS PE=1 SV=1 - [RASK_HUMAN]	6.37964e+08	2.6302e+08	3.59023e+08	2.57679e+08	2.40957e+08	3.02634e+08	0.635925	0.250722
O75367	Core histone macro-H2A.1 OS=Homo sapiens OX=9606 GN=MACROH2A1 PE=1 SV=4 - [H2AY_HUMAN]	4.43315e+06	8.35206e+06	7.81709e+06	8.4285e+08	9.05162e+08	1.04467e+09	135.552	0.000101545
P46778	60S ribosomal protein L21 OS=Homo sapiens OX=9606 GN=RPL21 PE=1 SV=2 - [RL21_HUMAN]	2.52411e+08	2.73639e+08	268435456	3.86502e+08	3.08116e+08	3.45162e+08	1.30875	0.025446
Q15366	Poly(rC)-binding protein 2 OS=Homo sapiens OX=9606 GN=PCBP2 PE=1 SV=1 - [PCBP2_HUMAN]	5.65127e+08	4.32852e+08	5.37057e+08	8.99719e+08	7.10766e+08	7.7413e+08	1.55346	0.0144944
P62826	GTP-binding nuclear protein Ran OS=Homo sapiens OX=9606 GN=RAN PE=1 SV=3 - [RAN_HUMAN]	3.6454e+08	3.3935e+08	3.22785e+08	5.87739e+08	7.23943e+08	6.8646e+08	1.94623	0.00157827
Q15717	ELAV-like protein 1 OS=Homo sapiens OX=9606 GN=ELAVL1 PE=1 SV=2 - [ELAV1_HUMAN]	7.07108e+06	5.52943e+06	7.03393e+06	3.67763e+08	4.50515e+08	4.92927e+08	66.7808	0.000303841
Q15233	Non-POU domain-containing octamer-binding protein OS=Homo sapiens OX=9606 GN=NONO PE=1 SV=4 - [NONO_HUMAN]	1.25212e+08	1.28243e+08	1.05905e+08	5.48076e+08	4.77161e+08	4.48397e+08	4.10071	0.000258801
Q9BUF5	Tubulin beta-6 chain OS=Homo sapiens OX=9606 GN=TUBB6 PE=1 SV=1 - [TBB6_HUMAN]	1.44068e+09	1.237e+09	1.19743e+09	2.27418e+09	1.50467e+09	1.69355e+09	1.41219	0.0940432
P52597	Heterogeneous nuclear ribonucleoprotein F OS=Homo sapiens OX=9606 GN=HNRNPF PE=1 SV=3 - [HNRPF_HUMAN]	1.94204e+08	1.52159e+08	1.65035e+08	8.00763e+08	6.38185e+08	9.20537e+08	4.61379	0.00173975
P46940	Ras GTPase-activating-like protein IQGAP1 OS=Homo sapiens OX=9606 GN=IQGAP1 PE=1 SV=1 - [IQGA1_HUMAN]	4.38044e+08	3.1577e+08	3.18408e+08	3.86582e+08	3.4209e+08	3.29294e+08	0.986704	0.91902
P31943	Heterogeneous nuclear ribonucleoprotein H OS=Homo sapiens OX=9606 GN=HNRNPH1 PE=1 SV=4 - [HNRH1_HUMAN]	1.89025e+08	1.51895e+08	2.0393e+08	1.25028e+09	1.00894e+09	1.29177e+09	6.51737	0.00036273
P14923	Junction plakoglobin OS=Homo sapiens OX=9606 GN=JUP PE=1 SV=3 - [PLAK_HUMAN]	1.56892e+08	1.20428e+08	1.52877e+08	2.32298e+08	1.97736e+08	2.21311e+08	1.51406	0.00873538
Q13573	SNW domain-containing protein 1 OS=Homo sapiens OX=9606 GN=SNW1 PE=1 SV=1 - [SNW1_HUMAN]	3.3209e+08	2.93544e+08	3.20378e+08	1.92396e+08	2.19007e+08	1.84034e+08	0.629418	0.00167216
P50454	Serpin H1 OS=Homo sapiens OX=9606 GN=SERPINH1 PE=1 SV=2 - [SERPH_HUMAN]	1.93037e+08	1.63941e+08	1.91478e+08	2.53445e+08	2.15692e+08	2.59561e+08	1.32864	0.0226192
P62851	40S ribosomal protein S25 OS=Homo sapiens OX=9606 GN=RPS25 PE=1 SV=1 - [RS25_HUMAN]	4.35372e+09	1.12749e+10	3.04881e+09	3.9968e+09	7.07312e+09	7.35613e+09	0.98654	0.977314
Q14331	Protein FRG1 OS=Homo sapiens OX=9606 GN=FRG1 PE=1 SV=1 - [FRG1_HUMAN]	2.46989e+09	1.86949e+09	2.36403e+09	1.53171e+09	1.67382e+09	1.40556e+09	0.687874	0.0254266
O00159	Unconventional myosin-Ic OS=Homo sapiens OX=9606 GN=MYO1C PE=1 SV=4 - [MYO1C_HUMAN]	5.6104e+07	6.00433e+07	2.97771e+07	5.0777e+08	4.99151e+08	3.90866e+08	9.57884	0.000423539
O14818	Proteasome subunit alpha type-7 OS=Homo sapiens OX=9606 GN=PSMA7 PE=1 SV=1 - [PSA7_HUMAN]	2.07956e+08	2.44447e+10	2.54016e+10	8.80671e+07	1.84328e+08	1.78866e+08	0.00901544	0.115345
P83881	60S ribosomal protein L36a OS=Homo sapiens OX=9606 GN=RPL36A PE=1 SV=2 - [RL36A_HUMAN]	1.67653e+08	1.59358e+08	9.90875e+07	3.3612e+08	2.42734e+08	2.75676e+08	2.00547	0.0148798
Q9BVP2	Guanine nucleotide-binding protein-like 3 OS=Homo sapiens OX=9606 GN=GNL3 PE=1 SV=2 - [GNL3_HUMAN]	1.36677e+08	1.45425e+08	2.108e+08	3.93858e+08	3.91653e+08	3.64236e+08	2.33261	0.000973751
Q12905	Interleukin enhancer-binding factor 2 OS=Homo sapiens OX=9606 GN=ILF2 PE=1 SV=2 - [ILF2_HUMAN]	8.00517e+06	4.78893e+07	5.86448e+07	5.14537e+08	4.91631e+08	4.68898e+08	12.8783	2.36263e-05
Q13509	Tubulin beta-3 chain OS=Homo sapiens OX=9606 GN=TUBB3 PE=1 SV=2 - [TBB3_HUMAN]	2.22321e+09	1.73694e+09	1.57631e+09	3.09974e+09	2.5988e+09	2.43606e+09	1.46928	0.0359812
P11142	Heat shock cognate 71 kDa protein OS=Homo sapiens OX=9606 GN=HSPA8 PE=1 SV=1 - [HSP7C_HUMAN]	3.79125e+08	2.93442e+08	3.35747e+08	6.76118e+08	1.02687e+09	8.66906e+08	2.5487	0.00755454
P49327	Fatty acid synthase OS=Homo sapiens OX=9606 GN=FASN PE=1 SV=3 - [FAS_HUMAN]	3.09722e+08	2.3127e+08	2.20759e+08	6.18844e+08	6.63214e+08	7.56781e+08	2.67652	0.000997022
Q9Y446	Plakophilin-3 OS=Homo sapiens OX=9606 GN=PKP3 PE=1 SV=1 - [PKP3_HUMAN]	3.52122e+08	2.91395e+08	3.1724e+08	3.09293e+08	3.50782e+08	2.75027e+08	0.973298	0.776012
P09874	Poly [ADP-ribose] polymerase 1 OS=Homo sapiens OX=9606 GN=PARP1 PE=1 SV=4 - [PARP1_HUMAN]	1.2711e+08	1.57951e+08	1.25013e+08	6.50061e+08	7.12048e+08	5.43272e+08	4.64644	0.000587899
Q9H089	Large subunit GTPase 1 homolog OS=Homo sapiens OX=9606 GN=LSG1 PE=1 SV=2 - [LSG1_HUMAN]	3.6886e+08	3.07583e+08	2.52989e+08	1.91756e+08	2.30565e+08	1.65471e+08	0.632421	0.0414466
Q05639	Elongation factor 1-alpha 2 OS=Homo sapiens OX=9606 GN=EEF1A2 PE=1 SV=1 - [EF1A2_HUMAN]	1.02742e+10	1.06986e+10	1.06144e+10	1.26078e+10	1.41188e+10	9.67624e+09	1.15246	0.287826
P62937	Peptidyl-prolyl cis-trans isomerase A OS=Homo sapiens OX=9606 GN=PPIA PE=1 SV=2 - [PPIA_HUMAN]	6.97553e+07	9.37945e+07	6.28932e+07	1.06148e+08	1.80735e+08	1.52021e+08	1.93825	0.0401829
P60866	40S ribosomal protein S20 OS=Homo sapiens OX=9606 GN=RPS20 PE=1 SV=1 - [RS20_HUMAN]	2.39591e+08	3.36469e+08	1.35245e+08	1.17607e+08	5.69176e+08	2.32846e+08	1.29287	0.662107
P60842	Eukaryotic initiation factor 4A-I OS=Homo sapiens OX=9606 GN=EIF4A1 PE=1 SV=1 - [IF4A1_HUMAN]	4.68379e+08	3.54915e+08	3.46481e+08	6.62709e+08	5.47696e+08	5.42632e+08	1.49861	0.0248493
Q8WU90	Zinc finger CCCH domain-containing protein 15 OS=Homo sapiens OX=9606 GN=ZC3H15 PE=1 SV=1 - [ZC3HF_HUMAN]	2.42616e+08	2.16396e+08	1.92102e+08	2.21388e+08	2.00274e+08	2.42465e+08	1.01998	0.830643
P42677	40S ribosomal protein S27 OS=Homo sapiens OX=9606 GN=RPS27 PE=1 SV=3 - [RS27_HUMAN]	1.38797e+08	6.41569e+07	4.29462e+06	6.5275e+06	9.50182e+07	6.09448e+07	0.784037	0.765193
Q71UM5	40S ribosomal protein S27-like OS=Homo sapiens OX=9606 GN=RPS27L PE=1 SV=3 - [RS27L_HUMAN]	1.70441e+08	7.08223e+07	2.40399e+06	1.36737e+07	1.18409e+08	6.09448e+07	0.792174	0.7834
P11586	C-1-tetrahydrofolate synthase, cytoplasmic OS=Homo sapiens OX=9606 GN=MTHFD1 PE=1 SV=4 - [C1TC_HUMAN]	5.87576e+08	9.98924e+08	7.57095e+08	4.30339e+08	3.70552e+08	3.31148e+08	0.483035	0.0302446
Q16576	Histone-binding protein RBBP7 OS=Homo sapiens OX=9606 GN=RBBP7 PE=1 SV=1 - [RBBP7_HUMAN]	7.99946e+07	8.90307e+07	7.81856e+07	2.06619e+08	2.01849e+08	1.77212e+08	2.36915	0.000313525
P06748	Nucleophosmin OS=Homo sapiens OX=9606 GN=NPM1 PE=1 SV=2 - [NPM_HUMAN]	1.08679e+08	3.82989e+07	2.71528e+07	2.4039e+08	4.44405e+08	4.32283e+08	6.41516	0.0113576
P36542	ATP synthase subunit gamma, mitochondrial OS=Homo sapiens OX=9606 GN=ATP5F1C PE=1 SV=1 - [ATPG_HUMAN]	1.20143e+09	9.94641e+08	9.69456e+08	7.22088e+08	7.40026e+08	7.16852e+08	0.688343	0.0112055
Q01081	Splicing factor U2AF 35 kDa subunit OS=Homo sapiens OX=9606 GN=U2AF1 PE=1 SV=3 - [U2AF1_HUMAN]	3.38293e+08	4.84023e+08	5.54149e+08	4.46257e+08	7.14124e+08	6.06276e+08	1.28347	0.265197
Q9NVN8	Guanine nucleotide-binding protein-like 3-like protein OS=Homo sapiens OX=9606 GN=GNL3L PE=1 SV=1 - [GNL3L_HUMAN]	3.70475e+08	2.34124e+08	2.90246e+08	2.86071e+08	2.41944e+08	2.10552e+08	0.825358	0.313532
P07195	L-lactate dehydrogenase B chain OS=Homo sapiens OX=9606 GN=LDHB PE=1 SV=2 - [LDHB_HUMAN]	5.75085e+08	5.93511e+08	5.725e+08	1.03868e+09	9.94158e+08	8.63847e+08	1.66371	0.00188639
Q02543	60S ribosomal protein L18a OS=Homo sapiens OX=9606 GN=RPL18A PE=1 SV=2 - [RL18A_HUMAN]	1.99309e+07	5.55209e+06	1.9363e+07	1.08213e+08	6.6872e+07	1.1383e+08	6.44238	0.00635182
P47929	Galectin-7 OS=Homo sapiens OX=9606 GN=LGALS7 PE=1 SV=2 - [LEG7_HUMAN]	6.33526e+07	8.90925e+07	5.51172e+07	4.88694e+06	8.83623e+06	5.04587e+07	0.309217	0.0550266
Q7Z7K6	Centromere protein V OS=Homo sapiens OX=9606 GN=CENPV PE=1 SV=1 - [CENPV_HUMAN]	7.69879e+06	7.99297e+06	2.27258e+06	1.19771e+08	1.10219e+08	1.43741e+08	20.8041	0.000306009
Q9Y2R9	28S ribosomal protein S7, mitochondrial OS=Homo sapiens OX=9606 GN=MRPS7 PE=1 SV=2 - [RT07_HUMAN]	1.88711e+08	2.01025e+08	2.12885e+08	9.97836e+07	1.5484e+08	1.82865e+08	0.725975	0.0959494
Q8WVD3	E3 ubiquitin-protein ligase RNF138 OS=Homo sapiens OX=9606 GN=RNF138 PE=1 SV=1 - [RN138_HUMAN]	5.80635e+06	1.14243e+07	4.62878e+06	5.86977e+07	4.62974e+06	7.14832e+07	6.16716	0.141545
Q9H0A0	RNA cytidine acetyltransferase OS=Homo sapiens OX=9606 GN=NAT10 PE=1 SV=2 - [NAT10_HUMAN]	2.96776e+08	2.4539e+08	2.84963e+08	5.01613e+08	5.78483e+08	5.00606e+08	1.91107	0.00112872
P62277	40S ribosomal protein S13 OS=Homo sapiens OX=9606 GN=RPS13 PE=1 SV=2 - [RS13_HUMAN]	5.36323e+07	5.77504e+06	2.30734e+06	7.40451e+07	9.21512e+07	1.88292e+08	5.74399	0.0671916
P60891	Ribose-phosphate pyrophosphokinase 1 OS=Homo sapiens OX=9606 GN=PRPS1 PE=1 SV=2 - [PRPS1_HUMAN]	2.71655e+08	1.80122e+08	1.67084e+08	3.9424e+08	3.0584e+08	7.06346e+08	2.2726	0.105318
P68133	Actin, alpha skeletal muscle OS=Homo sapiens OX=9606 GN=ACTA1 PE=1 SV=1 - [ACTS_HUMAN]	3.98823e+09	4.27507e+09	4.79339e+09	1.05674e+10	6.57708e+09	7.58814e+09	1.89425	0.033266
Q5T280	Putative methyltransferase C9orf114 OS=Homo sapiens OX=9606 GN=SPOUT1 PE=1 SV=3 - [CI114_HUMAN]	1.35846e+08	1.53642e+08	1.37876e+08	1.56795e+08	1.31255e+08	1.36564e+08	0.993562	0.928491
P55036	26S proteasome non-ATPase regulatory subunit 4 OS=Homo sapiens OX=9606 GN=PSMD4 PE=1 SV=1 - [PSMD4_HUMAN]	1.29889e+08	9.79947e+07	1.25316e+08	4.1545e+08	4.37043e+08	7.33591e+08	4.49061	0.0163288
P05109	Protein S100-A8 OS=Homo sapiens OX=9606 GN=S100A8 PE=1 SV=1 - [S10A8_HUMAN]	3.20911e+08	5.95336e+07	2.79743e+07	6.21533e+06	8.03853e+06	9.4547e+06	0.0580496	0.239337
P61221	ATP-binding cassette sub-family E member 1 OS=Homo sapiens OX=9606 GN=ABCE1 PE=1 SV=1 - [ABCE1_HUMAN]	9.12929e+07	1.11828e+08	1.12762e+08	1.28456e+08	1.13901e+08	1.25082e+08	1.16322	0.106321
Q9BXK1	Krueppel-like factor 16 OS=Homo sapiens OX=9606 GN=KLF16 PE=1 SV=1 - [KLF16_HUMAN]	1.86927e+08	1.56762e+08	1.58961e+08	1.17795e+08	6.67563e+07	1.48368e+08	0.662326	0.09258
P51991	Heterogeneous nuclear ribonucleoprotein A3 OS=Homo sapiens OX=9606 GN=HNRNPA3 PE=1 SV=2 - [ROA3_HUMAN]	1.34939e+07	9.4135e+06	2.26299e+06	5.04857e+08	3.34145e+08	3.87602e+08	48.7321	0.00137089
P46776	60S ribosomal protein L27a OS=Homo sapiens OX=9606 GN=RPL27A PE=1 SV=2 - [RL27A_HUMAN]	8.18496e+08	4.73241e+08	6.76352e+08	1.1871e+09	1.00783e+09	1.13938e+09	1.69419	0.0160226
Q9H0G5	Nuclear speckle splicing regulatory protein 1 OS=Homo sapiens OX=9606 GN=NSRP1 PE=1 SV=1 - [NSRP1_HUMAN]	3.56963e+08	5.07278e+08	5.44554e+08	4.33153e+08	5.0318e+08	3.62976e+08	0.922284	0.630512
P16403	Histone H1.2 OS=Homo sapiens OX=9606 GN=H1-2 PE=1 SV=2 - [H12_HUMAN]	7.20467e+06	8.18925e+06	3.83236e+06	2.46442e+09	2.69736e+09	2.81854e+09	415.073	1.39659e-05
P25705	ATP synthase subunit alpha, mitochondrial OS=Homo sapiens OX=9606 GN=ATP5F1A PE=1 SV=1 - [ATPA_HUMAN]	3.21869e+08	3.20334e+08	3.25278e+08	2.37623e+08	2.2593e+08	1.92863e+08	0.678479	0.00153779
Q8N1G4	Leucine-rich repeat-containing protein 47 OS=Homo sapiens OX=9606 GN=LRRC47 PE=1 SV=1 - [LRC47_HUMAN]	2.00788e+08	1.56784e+08	1.41989e+08	1.65448e+08	1.40014e+08	1.17501e+08	0.846671	0.318759
P08237	ATP-dependent 6-phosphofructokinase, muscle type OS=Homo sapiens OX=9606 GN=PFKM PE=1 SV=2 - [PFKAM_HUMAN]	1.94717e+08	1.77692e+08	1.91637e+08	2.14306e+08	2.13358e+08	1.85584e+08	1.08723	0.202733
P26599	Polypyrimidine tract-binding protein 1 OS=Homo sapiens OX=9606 GN=PTBP1 PE=1 SV=1 - [PTBP1_HUMAN]	9.54888e+06	1.9004e+07	2.36728e+06	3.70321e+08	2.85853e+08	4.88641e+08	37.0249	0.00325912
P07900	Heat shock protein HSP 90-alpha OS=Homo sapiens OX=9606 GN=HSP90AA1 PE=1 SV=5 - [HS90A_HUMAN]	8.38828e+08	8.21793e+08	6.22716e+08	1.46129e+09	1.5982e+09	1.18974e+09	1.86098	0.00912543
P05388	60S acidic ribosomal protein P0 OS=Homo sapiens OX=9606 GN=RPLP0 PE=1 SV=1 - [RLA0_HUMAN]	1.80647e+08	1.17403e+08	9.35997e+07	1.73505e+08	1.92983e+08	2.2395e+08	1.50756	0.0905461
P04843	Dolichyl-diphosphooligosaccharide--protein glycosyltransferase subunit 1 OS=Homo sapiens OX=9606 GN=RPN1 PE=1 SV=1 - [RPN1_HUMAN]	6.28017e+07	6.99151e+07	6.53734e+07	1.45183e+08	1.47179e+08	1.66518e+08	2.31652	0.000257497
P15880	40S ribosomal protein S2 OS=Homo sapiens OX=9606 GN=RPS2 PE=1 SV=2 - [RS2_HUMAN]	3.37357e+08	1.98615e+08	2.28703e+08	5.20203e+08	6.40978e+08	5.06996e+08	2.18155	0.00736242
P22314	Ubiquitin-like modifier-activating enzyme 1 OS=Homo sapiens OX=9606 GN=UBA1 PE=1 SV=3 - [UBA1_HUMAN]	8.54099e+07	6.20488e+07	6.35065e+07	6.05143e+08	6.98556e+08	6.91618e+08	9.45804	4.33939e-05
Q7L014	Probable ATP-dependent RNA helicase DDX46 OS=Homo sapiens OX=9606 GN=DDX46 PE=1 SV=2 - [DDX46_HUMAN]	6.81529e+08	4.03746e+09	3.17945e+08	5.32239e+08	7.38335e+08	5.48874e+08	0.361222	0.416887
P12273	Prolactin-inducible protein OS=Homo sapiens OX=9606 GN=PIP PE=1 SV=1 - [PIP_HUMAN]	5.65138e+07	4.87805e+07	2.85443e+07	4.11874e+07	2.30378e+07	4.44299e+06	0.513067	0.18268
Q00325	Phosphate carrier protein, mitochondrial OS=Homo sapiens OX=9606 GN=SLC25A3 PE=1 SV=2 - [MPCP_HUMAN]	1.86448e+08	6.27265e+08	4.9457e+08	3.98471e+08	4.44929e+08	3.39209e+08	0.90394	0.77036
O43795	Unconventional myosin-Ib OS=Homo sapiens OX=9606 GN=MYO1B PE=1 SV=3 - [MYO1B_HUMAN]	1.61303e+08	1.33698e+08	1.32223e+08	4.12037e+08	5.29884e+08	4.0465e+08	3.15191	0.00181878
O95391	Pre-mRNA-splicing factor SLU7 OS=Homo sapiens OX=9606 GN=SLU7 PE=1 SV=2 - [SLU7_HUMAN]	1.84443e+08	1.04694e+08	9.78386e+07	1.76599e+08	1.46004e+07	1.96506e+08	1.00189	0.997147
Q9BU76	Multiple myeloma tumor-associated protein 2 OS=Homo sapiens OX=9606 GN=MMTAG2 PE=1 SV=1 - [MMTA2_HUMAN]	1.96193e+08	1.57798e+08	2.25273e+08	2.10537e+08	1.09382e+08	2.53586e+08	0.990059	0.969376
P23921	Ribonucleoside-diphosphate reductase large subunit OS=Homo sapiens OX=9606 GN=RRM1 PE=1 SV=1 - [RIR1_HUMAN]	1.32361e+08	1.67444e+08	1.75501e+08	4.53774e+08	4.66144e+08	3.66567e+08	2.70665	0.00135686
Q8N684	Cleavage and polyadenylation specificity factor subunit 7 OS=Homo sapiens OX=9606 GN=CPSF7 PE=1 SV=1 - [CPSF7_HUMAN]	3.57805e+08	3.39397e+08	3.23659e+08	3.19402e+08	2.74228e+08	3.0801e+08	0.883214	0.0768825
Q9HCC0	Methylcrotonoyl-CoA carboxylase beta chain, mitochondrial OS=Homo sapiens OX=9606 GN=MCCC2 PE=1 SV=1 - [MCCB_HUMAN]	2.10027e+08	1.71318e+08	1.57208e+08	2.13895e+07	5.12138e+06	5.37999e+07	0.149123	0.00200462
O43390	Heterogeneous nuclear ribonucleoprotein R OS=Homo sapiens OX=9606 GN=HNRNPR PE=1 SV=1 - [HNRPR_HUMAN]	1.19533e+07	3.05936e+06	7.45874e+06	8.93752e+08	7.80271e+08	7.95838e+08	109.912	2.15104e-05
Q96KK5	Histone H2A type 1-H OS=Homo sapiens OX=9606 GN=H2AC12 PE=1 SV=3 - [H2A1H_HUMAN]	6.13219e+07	5.32693e+07	1.35213e+06	1.8589e+09	3.78672e+09	3.34741e+09	77.564	0.00713079
O60814	Histone H2B type 1-K OS=Homo sapiens OX=9606 GN=H2BC12 PE=1 SV=3 - [H2B1K_HUMAN]	1.28501e+08	1.16924e+08	7.38554e+07	2.93091e+09	4.56763e+09	4.71856e+09	38.2645	0.00228138
P33992	DNA replication licensing factor MCM5 OS=Homo sapiens OX=9606 GN=MCM5 PE=1 SV=5 - [MCM5_HUMAN]	6.86507e+08	4.38074e+08	4.09418e+08	9.57834e+08	7.59303e+08	6.75978e+08	1.56005	0.0776936
Q13490	Baculoviral IAP repeat-containing protein 2 OS=Homo sapiens OX=9606 GN=BIRC2 PE=1 SV=2 - [BIRC2_HUMAN]	8.62504e+06	6.22137e+06	3.67573e+06	1.22703e+08	1.16625e+08	1.19854e+08	19.392	9.45317e-07
Q5JTH9	RRP12-like protein OS=Homo sapiens OX=9606 GN=RRP12 PE=1 SV=2 - [RRP12_HUMAN]	1.92422e+08	2.0076e+08	2.10333e+08	3.55556e+08	4.54593e+08	4.62699e+08	2.10906	0.00305074
Q9UJV9	Probable ATP-dependent RNA helicase DDX41 OS=Homo sapiens OX=9606 GN=DDX41 PE=1 SV=2 - [DDX41_HUMAN]	3.78364e+08	3.12201e+08	2.78095e+08	2.85042e+08	3.32597e+08	2.39624e+08	0.885	0.40403
P18124	60S ribosomal protein L7 OS=Homo sapiens OX=9606 GN=RPL7 PE=1 SV=1 - [RL7_HUMAN]	9.83436e+06	4.46244e+06	6.73525e+06	2.67934e+08	2.87065e+08	2.81449e+08	39.7701	1.31629e-06
P81605	Dermcidin OS=Homo sapiens OX=9606 GN=DCD PE=1 SV=2 - [DCD_HUMAN]	5.18557e+07	4.42639e+06	6.60795e+07	1.27427e+08	5.80704e+07	4.78969e+06	1.55512	0.602469
O60832	H/ACA ribonucleoprotein complex subunit DKC1 OS=Homo sapiens OX=9606 GN=DKC1 PE=1 SV=3 - [DKC1_HUMAN]	1.23243e+07	3.01035e+06	1.15725e+07	3.96652e+08	4.24297e+08	3.58923e+08	43.8498	3.66135e-05
P04908	Histone H2A type 1-B/E OS=Homo sapiens OX=9606 GN=H2AC4 PE=1 SV=2 - [H2A1B_HUMAN]	6.13219e+07	5.32693e+07	3.48566e+06	1.70367e+09	3.78672e+09	3.34741e+09	74.8479	0.0101601
P52272	Heterogeneous nuclear ribonucleoprotein M OS=Homo sapiens OX=9606 GN=HNRNPM PE=1 SV=3 - [HNRPM_HUMAN]	4.64894e+07	4.07812e+07	7.12803e+07	6.5681e+08	6.53087e+08	5.2688e+08	11.5848	0.000214958
P78371	T-complex protein 1 subunit beta OS=Homo sapiens OX=9606 GN=CCT2 PE=1 SV=4 - [TCPB_HUMAN]	1.99927e+08	2.00886e+08	1.27781e+08	3.03138e+08	2.07739e+08	2.95196e+08	1.52494	0.0766309
Q00839	Heterogeneous nuclear ribonucleoprotein U OS=Homo sapiens OX=9606 GN=HNRNPU PE=1 SV=6 - [HNRPU_HUMAN]	1.06546e+08	1.18024e+08	1.11642e+08	2.74812e+09	2.96174e+09	2.6071e+09	24.7373	1.34236e-05
P37802	Transgelin-2 OS=Homo sapiens OX=9606 GN=TAGLN2 PE=1 SV=3 - [TAGL2_HUMAN]	9.5699e+07	4.91198e+07	6.29237e+07	1.07704e+08	1.02121e+08	6.46748e+07	1.32135	0.313586
P27348	14-3-3 protein theta OS=Homo sapiens OX=9606 GN=YWHAQ PE=1 SV=1 - [1433T_HUMAN]	1.67073e+08	1.92182e+08	4.27464e+07	3.11401e+08	2.20515e+08	1.53121e+08	1.70407	0.220835
Q53H12	Acylglycerol kinase, mitochondrial OS=Homo sapiens OX=9606 GN=AGK PE=1 SV=2 - [AGK_HUMAN]	5.81539e+08	3.7497e+08	3.4323e+08	3.17636e+08	2.84904e+08	4.0077e+08	0.771932	0.29607
Q08211	ATP-dependent RNA helicase A OS=Homo sapiens OX=9606 GN=DHX9 PE=1 SV=4 - [DHX9_HUMAN]	5.78134e+07	4.56528e+07	4.04097e+07	1.08986e+09	1.20719e+09	9.89209e+08	22.8409	7.76066e-05
P17844	Probable ATP-dependent RNA helicase DDX5 OS=Homo sapiens OX=9606 GN=DDX5 PE=1 SV=1 - [DDX5_HUMAN]	5.21828e+08	3.89082e+08	4.00659e+08	9.57701e+08	9.19771e+08	8.83405e+08	2.10502	0.000529028
P63241	Eukaryotic translation initiation factor 5A-1 OS=Homo sapiens OX=9606 GN=EIF5A PE=1 SV=2 - [IF5A1_HUMAN]	1.05534e+07	2.17966e+07	1.54961e+07	3.51373e+07	1.97192e+07	4.26606e+07	2.03814	0.0917215
Q9Y3A2	Probable U3 small nucleolar RNA-associated protein 11 OS=Homo sapiens OX=9606 GN=UTP11 PE=1 SV=2 - [UTP11_HUMAN]	6.11988e+07	8.9439e+07	7.86476e+07	1.32013e+08	9.42115e+07	8.21809e+07	1.34507	0.198273
P11413	Glucose-6-phosphate 1-dehydrogenase OS=Homo sapiens OX=9606 GN=G6PD PE=1 SV=4 - [G6PD_HUMAN]	5.44565e+07	6.99296e+07	8.65122e+07	1.92316e+08	1.49887e+08	1.73336e+08	2.44449	0.00272015
P41250	Glycine--tRNA ligase OS=Homo sapiens OX=9606 GN=GARS1 PE=1 SV=3 - [GARS_HUMAN]	1.13082e+08	6.57949e+08	4.26074e+07	4.91631e+08	5.2078e+08	3.98692e+08	1.73431	0.371164
Q9Y5K5	Ubiquitin carboxyl-terminal hydrolase isozyme L5 OS=Homo sapiens OX=9606 GN=UCHL5 PE=1 SV=3 - [UCHL5_HUMAN]	8.75879e+06	1.38061e+07	8.99755e+06	3.3209e+08	3.29728e+08	3.30071e+08	31.4263	6.02028e-09
Q9BQG0	Myb-binding protein 1A OS=Homo sapiens OX=9606 GN=MYBBP1A PE=1 SV=2 - [MBB1A_HUMAN]	1.06903e+07	4.73456e+06	5.24896e+06	4.28108e+08	5.48798e+08	4.59663e+08	69.4873	0.000199496
P39023	60S ribosomal protein L3 OS=Homo sapiens OX=9606 GN=RPL3 PE=1 SV=2 - [RL3_HUMAN]	4.9147e+07	5.82518e+07	6.30241e+07	2.25492e+08	2.04312e+08	2.50147e+08	3.98979	0.000254341
P30050	60S ribosomal protein L12 OS=Homo sapiens OX=9606 GN=RPL12 PE=1 SV=1 - [RL12_HUMAN]	1.28269e+08	7.62482e+07	4.68485e+07	1.51181e+08	8.33801e+07	2.11987e+08	1.77649	0.214307
P0DMU8	Cancer/testis antigen family 45 member A5 OS=Homo sapiens OX=9606 GN=CT45A5 PE=2 SV=1 - [CT455_HUMAN]	1.33318e+08	1.16399e+08	1.09914e+08	1.19879e+08	1.53005e+08	1.07205e+08	1.05688	0.679507
P29508	Serpin B3 OS=Homo sapiens OX=9606 GN=SERPINB3 PE=1 SV=2 - [SPB3_HUMAN]	2.25101e+08	1.87407e+08	2.07466e+08	5.65345e+06	6.17754e+06	8.28575e+06	0.0324477	5.2303e-05
Q9Y305	Acyl-coenzyme A thioesterase 9, mitochondrial OS=Homo sapiens OX=9606 GN=ACOT9 PE=1 SV=2 - [ACOT9_HUMAN]	2.78287e+08	2.86012e+08	2.66157e+08	1.21695e+08	1.75854e+08	1.35095e+08	0.520972	0.0015506
Q8WUM4	Programmed cell death 6-interacting protein OS=Homo sapiens OX=9606 GN=PDCD6IP PE=1 SV=1 - [PDC6I_HUMAN]	1.88479e+07	6.55425e+06	3.09412e+06	2.68194e+08	2.86965e+08	2.0338e+08	26.6189	0.000701014
Q9NY93	Probable ATP-dependent RNA helicase DDX56 OS=Homo sapiens OX=9606 GN=DDX56 PE=1 SV=1 - [DDX56_HUMAN]	1.22686e+08	7.0338e+07	7.64228e+07	1.63929e+08	7.66828e+07	1.25839e+08	1.36001	0.344359
P36578	60S ribosomal protein L4 OS=Homo sapiens OX=9606 GN=RPL4 PE=1 SV=5 - [RL4_HUMAN]	3.36266e+07	3.28161e+07	2.77907e+07	3.94049e+08	3.54325e+08	3.8602e+08	12.0381	9.31174e-06
P62263	40S ribosomal protein S14 OS=Homo sapiens OX=9606 GN=RPS14 PE=1 SV=3 - [RS14_HUMAN]	2.65677e+08	7.36954e+08	4.45061e+07	1.82763e+08	2.35443e+08	2.30869e+08	0.619856	0.552528
Q9BUP3	Oxidoreductase HTATIP2 OS=Homo sapiens OX=9606 GN=HTATIP2 PE=1 SV=2 - [HTAI2_HUMAN]	1.32214e+08	1.20037e+08	1.05759e+08	7.54334e+07	1.78259e+08	7.51568e+07	0.918549	0.795912
O75940	Survival of motor neuron-related-splicing factor 30 OS=Homo sapiens OX=9606 GN=SMNDC1 PE=1 SV=1 - [SPF30_HUMAN]	2.21403e+08	1.58313e+08	1.49814e+08	1.38163e+08	1.71009e+08	1.62144e+08	0.890066	0.474679
P38646	Stress-70 protein, mitochondrial OS=Homo sapiens OX=9606 GN=HSPA9 PE=1 SV=2 - [GRP75_HUMAN]	7.74091e+07	4.89125e+07	5.87669e+07	3.15071e+08	3.14416e+08	2.21204e+08	4.59613	0.00234754
Q9H0U4	Ras-related protein Rab-1B OS=Homo sapiens OX=9606 GN=RAB1B PE=1 SV=1 - [RAB1B_HUMAN]	1.61953e+08	6.0327e+07	3.69738e+07	3.84825e+07	1.69875e+08	9.32758e+07	1.16347	0.806794
Q9H8M2	Bromodomain-containing protein 9 OS=Homo sapiens OX=9606 GN=BRD9 PE=1 SV=2 - [BRD9_HUMAN]	1.35395e+08	1.4192e+08	1.40559e+08	8.30168e+07	1.25143e+08	9.93971e+07	0.736004	0.041529
O15371	Eukaryotic translation initiation factor 3 subunit D OS=Homo sapiens OX=9606 GN=EIF3D PE=1 SV=1 - [EIF3D_HUMAN]	8.84157e+07	1.47588e+08	8.64403e+07	1.20562e+08	6.47286e+07	9.6592e+07	0.874206	0.627523
P0DMV8	Heat shock 70 kDa protein 1A OS=Homo sapiens OX=9606 GN=HSPA1A PE=1 SV=1 - [HS71A_HUMAN]	2.83938e+08	2.32523e+08	2.78461e+08	5.30766e+08	5.76082e+08	4.98079e+08	2.01897	0.000636115
P10412	Histone H1.4 OS=Homo sapiens OX=9606 GN=H1-4 PE=1 SV=2 - [H14_HUMAN]	7.33518e+06	5.00868e+06	1.90541e+07	2.46442e+09	2.69736e+09	2.81854e+09	254.166	1.40956e-05
P01834	Immunoglobulin kappa constant OS=Homo sapiens OX=9606 GN=IGKC PE=1 SV=2 - [IGKC_HUMAN]	6.98037e+07	7.64917e+07	9.78589e+07	6.03407e+06	6.78727e+06	1.18905e+07	0.101214	0.00107524
P06702	Protein S100-A9 OS=Homo sapiens OX=9606 GN=S100A9 PE=1 SV=1 - [S10A9_HUMAN]	3.99633e+08	3.14765e+08	2.19113e+08	4.46367e+06	6.11098e+07	6.3129e+07	0.137869	0.00847856
Q96EY4	Translation machinery-associated protein 16 OS=Homo sapiens OX=9606 GN=TMA16 PE=1 SV=2 - [TMA16_HUMAN]	3.13872e+08	2.21726e+08	1.92516e+08	1.43542e+08	2.61349e+08	2.36719e+08	0.881195	0.603582
P61313	60S ribosomal protein L15 OS=Homo sapiens OX=9606 GN=RPL15 PE=1 SV=2 - [RL15_HUMAN]	9.37833e+06	1.14401e+07	4.49472e+06	9.44338e+07	9.71762e+07	1.16698e+08	12.1797	0.000207452
Q9NX24	H/ACA ribonucleoprotein complex subunit 2 OS=Homo sapiens OX=9606 GN=NHP2 PE=1 SV=1 - [NHP2_HUMAN]	3.57905e+08	1.79163e+08	1.68246e+08	1.62628e+08	2.43948e+08	2.02718e+08	0.863862	0.652165
Q13642	Four and a half LIM domains protein 1 OS=Homo sapiens OX=9606 GN=FHL1 PE=1 SV=4 - [FHL1_HUMAN]	1.29976e+09	1.15946e+09	1.17377e+09	1.17458e+09	1.30364e+09	1.11454e+09	0.988929	0.860207
P0C0S5	Histone H2A.Z OS=Homo sapiens OX=9606 GN=H2AZ1 PE=1 SV=2 - [H2AZ_HUMAN]	6.13219e+07	5.32693e+07	1.5288e+07	1.06345e+09	2.87417e+09	2.10591e+09	46.532	0.0198533
Q16630	Cleavage and polyadenylation specificity factor subunit 6 OS=Homo sapiens OX=9606 GN=CPSF6 PE=1 SV=2 - [CPSF6_HUMAN]	1.70037e+09	1.56694e+09	1.3339e+09	1.71303e+09	1.85787e+09	1.46211e+09	1.09384	0.412718
P50238	Cysteine-rich protein 1 OS=Homo sapiens OX=9606 GN=CRIP1 PE=1 SV=3 - [CRIP1_HUMAN]	1.8694e+08	6.19628e+07	2.79264e+06	6.11449e+06	5.30492e+06	9.94266e+06	0.0848727	0.23025
Q15149	Plectin OS=Homo sapiens OX=9606 GN=PLEC PE=1 SV=3 - [PLEC_HUMAN]	8.19477e+07	1.1768e+08	7.58686e+07	4.55224e+08	4.4496e+08	3.99439e+08	4.71738	9.26318e-05
Q92841	Probable ATP-dependent RNA helicase DDX17 OS=Homo sapiens OX=9606 GN=DDX17 PE=1 SV=2 - [DDX17_HUMAN]	3.90217e+08	2.82622e+08	3.15027e+08	9.00156e+08	9.79588e+08	8.48418e+08	2.76167	0.000308182
P00558	Phosphoglycerate kinase 1 OS=Homo sapiens OX=9606 GN=PGK1 PE=1 SV=3 - [PGK1_HUMAN]	1.15523e+08	8.22094e+07	5.83933e+07	2.80904e+08	1.48645e+08	2.59292e+08	2.68947	0.0309528
P08729	Keratin, type II cytoskeletal 7 OS=Homo sapiens OX=9606 GN=KRT7 PE=1 SV=5 - [K2C7_HUMAN]	4.77151e+09	5.08359e+09	6.3026e+09	3.47099e+09	2.71123e+09	2.98772e+09	0.567528	0.0107926
O43290	U4/U6.U5 tri-snRNP-associated protein 1 OS=Homo sapiens OX=9606 GN=SART1 PE=1 SV=1 - [SNUT1_HUMAN]	1.42195e+08	1.15667e+08	1.08356e+08	1.36054e+08	1.57186e+08	1.36507e+08	1.17347	0.163401
P09429	High mobility group protein B1 OS=Homo sapiens OX=9606 GN=HMGB1 PE=1 SV=3 - [HMGB1_HUMAN]	7.32081e+07	8.03392e+07	8.9882e+06	5.13453e+06	2.09653e+07	4.69274e+06	0.189451	0.132696
O60264	SWI/SNF-related matrix-associated actin-dependent regulator of chromatin subfamily A member 5 OS=Homo sapiens OX=9606 GN=SMARCA5 PE=1 SV=1 - [SMCA5_HUMAN]	1.02676e+07	3.89691e+06	2.66259e+06	2.29592e+08	2.55173e+08	1.82459e+08	39.6517	0.000536907
P40818	Ubiquitin carboxyl-terminal hydrolase 8 OS=Homo sapiens OX=9606 GN=USP8 PE=1 SV=1 - [UBP8_HUMAN]	7.13212e+06	2.48016e+06	7.51895e+06	4.42653e+08	5.35793e+08	5.021e+08	86.4238	5.74485e-05
O43809	Cleavage and polyadenylation specificity factor subunit 5 OS=Homo sapiens OX=9606 GN=NUDT21 PE=1 SV=1 - [CPSF5_HUMAN]	2.9001e+07	8.79756e+07	8.02279e+07	2.09576e+08	2.58215e+08	2.50182e+08	3.64076	0.00189427
P30041	Peroxiredoxin-6 OS=Homo sapiens OX=9606 GN=PRDX6 PE=1 SV=3 - [PRDX6_HUMAN]	5.27585e+07	2.79937e+07	4.64991e+07	1.09807e+08	9.33793e+07	8.43392e+07	2.25951	0.00710813
P46783	40S ribosomal protein S10 OS=Homo sapiens OX=9606 GN=RPS10 PE=1 SV=1 - [RS10_HUMAN]	6.62997e+07	4.23571e+07	5.72601e+06	8.80854e+07	4.02979e+07	9.95212e+07	1.99247	0.208817
Q9BPW8	Protein NipSnap homolog 1 OS=Homo sapiens OX=9606 GN=NIPSNAP1 PE=1 SV=1 - [NIPS1_HUMAN]	6.48004e+07	2.43092e+07	6.84538e+06	1.092e+08	8.0402e+06	6.81792e+06	1.29288	0.817511
P62191	26S proteasome regulatory subunit 4 OS=Homo sapiens OX=9606 GN=PSMC1 PE=1 SV=1 - [PRS4_HUMAN]	1.31219e+08	1.78e+08	1.72653e+08	1.27631e+08	1.78e+08	1.75586e+08	0.99864	0.992579
P63104	14-3-3 protein zeta/delta OS=Homo sapiens OX=9606 GN=YWHAZ PE=1 SV=1 - [1433Z_HUMAN]	2.07021e+08	1.91146e+08	8.65542e+07	2.42263e+08	2.00639e+07	5.51899e+07	0.655051	0.517593
P12814	Alpha-actinin-1 OS=Homo sapiens OX=9606 GN=ACTN1 PE=1 SV=2 - [ACTN1_HUMAN]	2.64397e+07	1.98124e+07	2.92458e+06	4.01465e+08	4.75873e+08	4.99808e+08	28.0041	0.000129801
P12268	Inosine-5'-monophosphate dehydrogenase 2 OS=Homo sapiens OX=9606 GN=IMPDH2 PE=1 SV=2 - [IMDH2_HUMAN]	6.63825e+07	6.28496e+07	6.2963e+07	2.28925e+08	1.65299e+08	1.80835e+08	2.99206	0.0026529
Q99497	Parkinson disease protein 7 OS=Homo sapiens OX=9606 GN=PARK7 PE=1 SV=2 - [PARK7_HUMAN]	9.49523e+07	2.36346e+07	8.02016e+06	6.66684e+07	5.23759e+07	4.58272e+07	1.30223	0.666408
Q13151	Heterogeneous nuclear ribonucleoprotein A0 OS=Homo sapiens OX=9606 GN=HNRNPA0 PE=1 SV=1 - [ROA0_HUMAN]	1.05827e+07	7.03588e+06	7.94767e+06	1.57012e+08	1.66656e+08	1.54926e+08	18.7198	2.31199e-06
Q9BZE4	GTP-binding protein 4 OS=Homo sapiens OX=9606 GN=GTPBP4 PE=1 SV=3 - [GTPB4_HUMAN]	3.18237e+07	4.39726e+07	4.18588e+06	2.62347e+08	3.07604e+08	2.35737e+08	10.0733	0.000549956
P06744	Glucose-6-phosphate isomerase OS=Homo sapiens OX=9606 GN=GPI PE=1 SV=4 - [G6PI_HUMAN]	1.41615e+08	1.01226e+08	1.02967e+08	2.06119e+08	1.76452e+08	2.27754e+08	1.76493	0.0113601
P15924	Desmoplakin OS=Homo sapiens OX=9606 GN=DSP PE=1 SV=3 - [DESP_HUMAN]	1.4265e+08	4.17363e+07	1.8308e+08	1.98725e+08	2.82035e+08	3.46337e+08	2.25081	0.0628868
O43175	D-3-phosphoglycerate dehydrogenase OS=Homo sapiens OX=9606 GN=PHGDH PE=1 SV=4 - [SERA_HUMAN]	1.48121e+08	1.63873e+08	1.42235e+08	2.95749e+08	3.22584e+08	2.82192e+08	1.98254	0.000386836
Q9P031	Thyroid transcription factor 1-associated protein 26 OS=Homo sapiens OX=9606 GN=CCDC59 PE=1 SV=2 - [TAP26_HUMAN]	6.78761e+07	6.91583e+07	6.20789e+07	3.79554e+07	1.07931e+07	2.04912e+07	0.34774	0.00628146
O00233	26S proteasome non-ATPase regulatory subunit 9 OS=Homo sapiens OX=9606 GN=PSMD9 PE=1 SV=3 - [PSMD9_HUMAN]	9.38809e+06	7.45305e+06	3.05555e+06	1.6703e+07	5.75546e+06	1.00473e+07	1.63372	0.318845
P23246	Splicing factor, proline- and glutamine-rich OS=Homo sapiens OX=9606 GN=SFPQ PE=1 SV=2 - [SFPQ_HUMAN]	1.50379e+07	9.3071e+06	5.27449e+06	5.10204e+08	6.47049e+08	5.51811e+08	57.7007	0.000160344
P55795	Heterogeneous nuclear ribonucleoprotein H2 OS=Homo sapiens OX=9606 GN=HNRNPH2 PE=1 SV=1 - [HNRH2_HUMAN]	1.02482e+08	1.98106e+08	2.23996e+08	1.17752e+09	8.48477e+08	1.02345e+09	5.81307	0.00117595
O43660	Pleiotropic regulator 1 OS=Homo sapiens OX=9606 GN=PLRG1 PE=1 SV=1 - [PLRG1_HUMAN]	9.96543e+06	5.87232e+06	5.295e+06	2.22484e+07	4.65185e+07	2.47959e+07	4.42738	0.0369448
Q5T2T1	MAGUK p55 subfamily member 7 OS=Homo sapiens OX=9606 GN=MPP7 PE=1 SV=1 - [MPP7_HUMAN]	8.35016e+07	3.99724e+07	4.98469e+07	5.07252e+07	7.90466e+07	3.66117e+07	0.959974	0.904745
Q9NS86	LanC-like protein 2 OS=Homo sapiens OX=9606 GN=LANCL2 PE=1 SV=1 - [LANC2_HUMAN]	2.70852e+07	5.34886e+06	2.41681e+07	6.23852e+07	7.1786e+07	6.54096e+07	3.52603	0.00292116
Q15323	Keratin, type I cuticular Ha1 OS=Homo sapiens OX=9606 GN=KRT31 PE=1 SV=3 - [K1H1_HUMAN]	3.80223e+09	8.55877e+07	9.14576e+07	6.35253e+06	6.38963e+06	2.22696e+08	0.059166	0.371159
Q9H7B2	Ribosome production factor 2 homolog OS=Homo sapiens OX=9606 GN=RPF2 PE=1 SV=2 - [RPF2_HUMAN]	5.33923e+06	1.31933e+07	7.2931e+06	6.55322e+07	5.67179e+07	8.38147e+07	7.97909	0.00195199
Q99959	Plakophilin-2 OS=Homo sapiens OX=9606 GN=PKP2 PE=1 SV=2 - [PKP2_HUMAN]	2.00695e+07	4.82692e+07	6.21909e+07	8.24148e+07	8.35131e+07	1.37114e+08	2.32163	0.058413
P18085	ADP-ribosylation factor 4 OS=Homo sapiens OX=9606 GN=ARF4 PE=1 SV=3 - [ARF4_HUMAN]	8.22892e+07	1.75188e+07	3.99012e+06	3.55908e+07	2.75586e+07	5.08273e+07	1.09806	0.899035
Q8N0V3	Putative ribosome-binding factor A, mitochondrial OS=Homo sapiens OX=9606 GN=RBFA PE=1 SV=3 - [RBFA_HUMAN]	2.34287e+08	2.74818e+08	1.83118e+08	1.59646e+08	1.75367e+08	1.78024e+08	0.741145	0.0926031
P45973	Chromobox protein homolog 5 OS=Homo sapiens OX=9606 GN=CBX5 PE=1 SV=1 - [CBX5_HUMAN]	1.09665e+07	5.76025e+06	1.08802e+07	1.48285e+08	1.29466e+08	2.466e+08	18.9935	0.0103841
P18754	Regulator of chromosome condensation OS=Homo sapiens OX=9606 GN=RCC1 PE=1 SV=1 - [RCC1_HUMAN]	4.615e+06	9.0457e+06	8.63641e+06	1.69475e+08	1.68456e+08	1.58433e+08	22.2614	1.99066e-06
Q9NX20	39S ribosomal protein L16, mitochondrial OS=Homo sapiens OX=9606 GN=MRPL16 PE=1 SV=1 - [RM16_HUMAN]	3.94815e+08	3.62272e+08	3.50345e+08	2.46583e+08	2.89141e+08	2.25008e+08	0.686934	0.00742524
Q14562	ATP-dependent RNA helicase DHX8 OS=Homo sapiens OX=9606 GN=DHX8 PE=1 SV=1 - [DHX8_HUMAN]	2.95934e+08	2.39541e+08	2.04638e+08	4.53303e+08	5.63992e+08	4.75378e+08	2.01682	0.00431274
Q99729	Heterogeneous nuclear ribonucleoprotein A/B OS=Homo sapiens OX=9606 GN=HNRNPAB PE=1 SV=2 - [ROAA_HUMAN]	1.52584e+07	4.68689e+06	5.28584e+06	2.87363e+08	2.38498e+08	2.24323e+08	29.7325	0.000238873
P62424	60S ribosomal protein L7a OS=Homo sapiens OX=9606 GN=RPL7A PE=1 SV=2 - [RL7A_HUMAN]	4.97961e+06	3.28054e+06	1.15878e+07	1.61158e+08	2.43087e+08	1.90828e+08	29.9817	0.00134815
P11802	Cyclin-dependent kinase 4 OS=Homo sapiens OX=9606 GN=CDK4 PE=1 SV=2 - [CDK4_HUMAN]	1.0722e+08	1.1379e+08	1.13822e+08	1.89997e+08	2.84509e+08	1.04992e+08	1.73071	0.19114
Q00610	Clathrin heavy chain 1 OS=Homo sapiens OX=9606 GN=CLTC PE=1 SV=5 - [CLH1_HUMAN]	8.53803e+07	4.63222e+07	3.88039e+07	2.10493e+08	2.60842e+08	2.78673e+08	4.39871	0.0015114
P82912	28S ribosomal protein S11, mitochondrial OS=Homo sapiens OX=9606 GN=MRPS11 PE=1 SV=2 - [RT11_HUMAN]	5.1809e+07	6.37856e+06	2.94983e+06	2.72963e+07	1.97261e+07	3.43284e+07	1.33062	0.700556
Q9NQ29	Putative RNA-binding protein Luc7-like 1 OS=Homo sapiens OX=9606 GN=LUC7L PE=1 SV=1 - [LUC7L_HUMAN]	8.65165e+08	6.89894e+08	7.23993e+08	1.7373e+09	1.15833e+09	1.23666e+09	1.81316	0.0308932
Q9H5N1	Rab GTPase-binding effector protein 2 OS=Homo sapiens OX=9606 GN=RABEP2 PE=1 SV=2 - [RABE2_HUMAN]	8.03296e+06	5.48249e+06	8.73272e+06	1.21316e+08	1.06635e+08	9.60911e+07	14.5649	0.000167804
Q96IU4	Protein ABHD14B OS=Homo sapiens OX=9606 GN=ABHD14B PE=1 SV=1 - [ABHEB_HUMAN]	4.85208e+07	3.76652e+06	3.00862e+07	1.32125e+07	7.35044e+06	1.97274e+07	0.489118	0.356462
Q9UH62	Armadillo repeat-containing X-linked protein 3 OS=Homo sapiens OX=9606 GN=ARMCX3 PE=1 SV=1 - [ARMX3_HUMAN]	6.07424e+07	6.26886e+07	6.92255e+07	1.27578e+08	9.27343e+07	9.02673e+07	1.61209	0.0331729
Q15084	Protein disulfide-isomerase A6 OS=Homo sapiens OX=9606 GN=PDIA6 PE=1 SV=1 - [PDIA6_HUMAN]	6.3288e+06	6.6929e+06	4.95413e+06	1.80047e+08	2.35982e+08	2.26667e+08	35.7534	0.000273783
Q12906	Interleukin enhancer-binding factor 3 OS=Homo sapiens OX=9606 GN=ILF3 PE=1 SV=3 - [ILF3_HUMAN]	1.24376e+07	6.35165e+06	8.44052e+06	2.50807e+08	3.13155e+08	2.41174e+08	29.5683	0.000331115
O43813	Glutathione S-transferase LANCL1 OS=Homo sapiens OX=9606 GN=LANCL1 PE=1 SV=1 - [LANC1_HUMAN]	1.72247e+08	1.91332e+08	2.25445e+08	2.78365e+08	2.35933e+08	1.73757e+08	1.16813	0.388209
Q13887	Krueppel-like factor 5 OS=Homo sapiens OX=9606 GN=KLF5 PE=1 SV=2 - [KLF5_HUMAN]	2.10917e+08	1.82156e+08	9.82804e+07	8.67464e+07	7.95137e+07	1.16528e+08	0.575529	0.122832
P61224	Ras-related protein Rap-1b OS=Homo sapiens OX=9606 GN=RAP1B PE=1 SV=1 - [RAP1B_HUMAN]	1.3062e+08	4.54224e+07	1.04129e+08	7.98174e+07	6.09068e+07	6.63457e+07	0.739083	0.398303
P62753	40S ribosomal protein S6 OS=Homo sapiens OX=9606 GN=RPS6 PE=1 SV=1 - [RS6_HUMAN]	9.22599e+07	3.40535e+07	5.10391e+07	1.77642e+08	2.77594e+08	3.02425e+08	4.27206	0.00988026
P38159	RNA-binding motif protein, X chromosome OS=Homo sapiens OX=9606 GN=RBMX PE=1 SV=3 - [RBMX_HUMAN]	2.05951e+07	1.3904e+07	5.57523e+06	7.1269e+08	6.63858e+08	5.45461e+08	47.961	0.000229291
P51153	Ras-related protein Rab-13 OS=Homo sapiens OX=9606 GN=RAB13 PE=1 SV=1 - [RAB13_HUMAN]	1.05927e+08	3.74458e+07	2.61934e+07	2.74119e+07	1.0271e+08	8.7477e+07	1.28326	0.661314
P08134	Rho-related GTP-binding protein RhoC OS=Homo sapiens OX=9606 GN=RHOC PE=1 SV=1 - [RHOC_HUMAN]	6.86854e+07	3.91579e+07	5.69266e+07	7.79529e+07	5.97858e+07	9.23751e+07	1.39658	0.162749
P61956	Small ubiquitin-related modifier 2 OS=Homo sapiens OX=9606 GN=SUMO2 PE=1 SV=3 - [SUMO2_HUMAN]	3.57954e+08	5.07067e+08	4.37437e+08	3.74554e+08	3.15049e+08	3.97258e+08	0.834469	0.220658
O95232	Luc7-like protein 3 OS=Homo sapiens OX=9606 GN=LUC7L3 PE=1 SV=2 - [LC7L3_HUMAN]	4.94159e+08	4.38256e+08	4.50671e+08	7.77356e+08	6.85414e+08	7.04537e+08	1.56701	0.00133351
Q01804	OTU domain-containing protein 4 OS=Homo sapiens OX=9606 GN=OTUD4 PE=1 SV=4 - [OTUD4_HUMAN]	1.28272e+07	3.50601e+06	1.1183e+07	2.62711e+08	2.61367e+08	2.38399e+08	27.7101	8.2136e-06
Q9UMY1	Nucleolar protein 7 OS=Homo sapiens OX=9606 GN=NOL7 PE=1 SV=2 - [NOL7_HUMAN]	1.99664e+08	2.02971e+08	1.75647e+08	2.16696e+08	3.2711e+08	3.14961e+08	1.48503	0.0602364
Q96PK6	RNA-binding protein 14 OS=Homo sapiens OX=9606 GN=RBM14 PE=1 SV=2 - [RBM14_HUMAN]	3.81823e+07	2.74976e+07	5.96327e+07	2.34628e+08	2.67525e+08	2.28086e+08	5.82734	0.000198112
Q02878	60S ribosomal protein L6 OS=Homo sapiens OX=9606 GN=RPL6 PE=1 SV=3 - [RL6_HUMAN]	5.23878e+06	1.167e+07	3.55323e+06	1.43652e+08	1.54893e+08	1.64499e+08	22.6294	2.24854e-05
P38919	Eukaryotic initiation factor 4A-III OS=Homo sapiens OX=9606 GN=EIF4A3 PE=1 SV=4 - [IF4A3_HUMAN]	7.76901e+06	3.51659e+08	3.99827e+08	3.54891e+08	2.95524e+08	2.69087e+08	1.21106	0.69347
P26373	60S ribosomal protein L13 OS=Homo sapiens OX=9606 GN=RPL13 PE=1 SV=4 - [RL13_HUMAN]	6.49218e+07	5.47327e+07	5.92618e+07	1.67874e+08	1.71603e+08	1.6742e+08	2.83315	4.5538e-06
P04083	Annexin A1 OS=Homo sapiens OX=9606 GN=ANXA1 PE=1 SV=2 - [ANXA1_HUMAN]	7.59385e+06	6.04567e+07	4.67132e+06	7.39681e+07	4.29454e+07	1.15059e+08	3.18986	0.127345
O15235	28S ribosomal protein S12, mitochondrial OS=Homo sapiens OX=9606 GN=MRPS12 PE=1 SV=1 - [RT12_HUMAN]	1.3449e+07	2.67221e+06	8.91745e+06	9.14974e+06	1.63399e+07	6.55925e+06	1.27998	0.614119
Q9UKM9	RNA-binding protein Raly OS=Homo sapiens OX=9606 GN=RALY PE=1 SV=1 - [RALY_HUMAN]	5.31596e+06	7.25226e+06	7.73999e+06	2.33331e+08	1.86836e+08	2.33525e+08	32.1885	0.000170272
O60701	UDP-glucose 6-dehydrogenase OS=Homo sapiens OX=9606 GN=UGDH PE=1 SV=1 - [UGDH_HUMAN]	1.25039e+08	1.34348e+08	1.1494e+08	8.92284e+07	8.13816e+07	9.71156e+07	0.71522	0.00789644
P09923	Intestinal-type alkaline phosphatase OS=Homo sapiens OX=9606 GN=ALPI PE=1 SV=2 - [PPBI_HUMAN]	3.95158e+06	6.88536e+06	1.11165e+07	3.07924e+08	2.31767e+08	1.86048e+08	33.0581	0.00274857
Q9H0S4	Probable ATP-dependent RNA helicase DDX47 OS=Homo sapiens OX=9606 GN=DDX47 PE=1 SV=1 - [DDX47_HUMAN]	6.30996e+06	1.22987e+07	1.9066e+07	1.30123e+08	4.81322e+07	8.17491e+07	6.9013	0.0370147
Q9Y5B9	FACT complex subunit SPT16 OS=Homo sapiens OX=9606 GN=SUPT16H PE=1 SV=1 - [SP16H_HUMAN]	4.99759e+06	6.1754e+06	1.14274e+07	5.0858e+08	5.25021e+08	4.52361e+08	65.7493	2.48785e-05
Q8N6M0	Deubiquitinase OTUD6B OS=Homo sapiens OX=9606 GN=OTUD6B PE=1 SV=1 - [OTU6B_HUMAN]	1.32162e+07	4.39338e+06	4.28184e+06	1.41047e+08	1.23711e+08	2.05221e+08	21.4687	0.00392453
P02768	Albumin OS=Homo sapiens OX=9606 GN=ALB PE=1 SV=2 - [ALBU_HUMAN]	1.4146e+11	2.02468e+11	2.08824e+11	1.21579e+11	1.20513e+11	9.80909e+10	0.615435	0.035944
Q9UHR4	Brain-specific angiogenesis inhibitor 1-associated protein 2-like protein 1 OS=Homo sapiens OX=9606 GN=BAIAP2L1 PE=1 SV=2 - [BI2L1_HUMAN]	4.24276e+07	5.12518e+07	6.68628e+07	4.69916e+07	3.33758e+07	1.41282e+08	1.38063	0.588443
Q8TC07	TBC1 domain family member 15 OS=Homo sapiens OX=9606 GN=TBC1D15 PE=1 SV=2 - [TBC15_HUMAN]	8.28287e+06	8.04633e+06	4.26259e+06	2.25805e+08	2.21204e+08	1.59901e+08	29.4733	0.000780965
O95478	Ribosome biogenesis protein NSA2 homolog OS=Homo sapiens OX=9606 GN=NSA2 PE=1 SV=1 - [NSA2_HUMAN]	4.44114e+06	1.44333e+07	1.06496e+07	7.44361e+07	9.5752e+07	8.06796e+07	8.49705	0.000449481
Q9BQA1	Methylosome protein 50 OS=Homo sapiens OX=9606 GN=WDR77 PE=1 SV=1 - [MEP50_HUMAN]	1.00452e+07	6.25856e+06	6.21016e+06	5.88414e+06	6.96263e+06	7.32589e+07	3.82455	0.395983
P26639	Threonine--tRNA ligase 1, cytoplasmic OS=Homo sapiens OX=9606 GN=TARS1 PE=1 SV=3 - [SYTC_HUMAN]	1.05927e+08	1.00165e+08	9.52028e+07	1.67026e+08	1.24158e+08	9.61511e+07	1.28557	0.240797
P15170	Eukaryotic peptide chain release factor GTP-binding subunit ERF3A OS=Homo sapiens OX=9606 GN=GSPT1 PE=1 SV=1 - [ERF3A_HUMAN]	6.7585e+07	1.18163e+08	9.27922e+07	1.08468e+08	1.01233e+08	7.83538e+07	1.03416	0.862605
Q2TBE0	CWF19-like protein 2 OS=Homo sapiens OX=9606 GN=CWF19L2 PE=1 SV=4 - [C19L2_HUMAN]	1.48687e+08	1.83232e+08	1.01521e+08	1.69229e+08	2.03013e+08	1.71603e+08	1.25472	0.230817
Q6YN16	Hydroxysteroid dehydrogenase-like protein 2 OS=Homo sapiens OX=9606 GN=HSDL2 PE=1 SV=1 - [HSDL2_HUMAN]	9.98182e+07	1.40257e+08	9.11096e+07	9.04427e+07	1.01366e+08	9.98252e+07	0.880577	0.443508
Q9BZE1	39S ribosomal protein L37, mitochondrial OS=Homo sapiens OX=9606 GN=MRPL37 PE=1 SV=2 - [RM37_HUMAN]	6.22901e+07	6.5057e+07	4.875e+07	6.53371e+07	1.03561e+08	7.57898e+07	1.3895	0.140626
Q96AG4	Leucine-rich repeat-containing protein 59 OS=Homo sapiens OX=9606 GN=LRRC59 PE=1 SV=1 - [LRC59_HUMAN]	1.68924e+08	1.05196e+08	6.95815e+07	9.03236e+07	8.05622e+07	8.28444e+07	0.738229	0.362543
P17987	T-complex protein 1 subunit alpha OS=Homo sapiens OX=9606 GN=TCP1 PE=1 SV=1 - [TCPA_HUMAN]	1.93264e+08	1.76966e+08	1.65345e+08	2.74742e+08	2.8227e+08	2.58377e+08	1.52245	0.000967091
Q8TEW0	Partitioning defective 3 homolog OS=Homo sapiens OX=9606 GN=PARD3 PE=1 SV=2 - [PARD3_HUMAN]	1.67293e+08	1.74071e+08	1.90656e+08	7.7694e+07	7.52558e+07	7.6391e+07	0.431076	0.000132822
Q4KMP7	TBC1 domain family member 10B OS=Homo sapiens OX=9606 GN=TBC1D10B PE=1 SV=3 - [TB10B_HUMAN]	1.8729e+08	1.37533e+08	1.4669e+08	1.47813e+08	1.77642e+08	1.45264e+08	0.998316	0.989263
P08865	40S ribosomal protein SA OS=Homo sapiens OX=9606 GN=RPSA PE=1 SV=4 - [RSSA_HUMAN]	2.76403e+08	2.53147e+08	1.74228e+08	4.03586e+08	4.50765e+08	4.36952e+08	1.83482	0.0044795
P27105	Stomatin OS=Homo sapiens OX=9606 GN=STOM PE=1 SV=3 - [STOM_HUMAN]	3.76887e+06	4.87771e+07	6.31828e+06	1.35649e+08	1.18721e+08	1.14423e+08	6.26514	0.00294154
Q14558	Phosphoribosyl pyrophosphate synthase-associated protein 1 OS=Homo sapiens OX=9606 GN=PRPSAP1 PE=1 SV=2 - [KPRA_HUMAN]	1.6174e+08	1.32701e+08	1.1353e+08	1.37943e+08	1.35451e+08	1.70595e+08	1.08829	0.541608
P43243	Matrin-3 OS=Homo sapiens OX=9606 GN=MATR3 PE=1 SV=2 - [MATR3_HUMAN]	1.05016e+07	1.15838e+07	6.43273e+06	8.9029e+08	1.02559e+09	8.33843e+08	96.4203	9.05902e-05
Q9NPA3	Mid1-interacting protein 1 OS=Homo sapiens OX=9606 GN=MID1IP1 PE=1 SV=1 - [M1IP1_HUMAN]	3.86777e+07	3.24114e+07	2.62479e+07	5.53058e+06	7.8873e+06	1.72656e+07	0.315229	0.0118669
Q01813	ATP-dependent 6-phosphofructokinase, platelet type OS=Homo sapiens OX=9606 GN=PFKP PE=1 SV=2 - [PFKAP_HUMAN]	1.02291e+08	3.83627e+07	8.52502e+07	9.67461e+07	1.07473e+08	7.10682e+07	1.21861	0.495058
P28074	Proteasome subunit beta type-5 OS=Homo sapiens OX=9606 GN=PSMB5 PE=1 SV=3 - [PSB5_HUMAN]	5.05392e+07	6.32166e+07	5.44036e+07	3.73111e+07	3.61602e+07	4.28324e+07	0.691627	0.0156152
P11387	DNA topoisomerase 1 OS=Homo sapiens OX=9606 GN=TOP1 PE=1 SV=2 - [TOP1_HUMAN]	2.46771e+08	1.73385e+08	1.72509e+08	3.02844e+08	3.13307e+08	2.43948e+08	1.45124	0.0528171
P08195	4F2 cell-surface antigen heavy chain OS=Homo sapiens OX=9606 GN=SLC3A2 PE=1 SV=3 - [4F2_HUMAN]	6.88236e+07	5.11383e+07	3.93211e+07	1.2057e+08	1.81124e+08	1.32682e+08	2.72707	0.010844
P35249	Replication factor C subunit 4 OS=Homo sapiens OX=9606 GN=RFC4 PE=1 SV=2 - [RFC4_HUMAN]	3.36919e+07	4.73063e+06	3.28343e+07	5.49913e+07	5.22164e+07	6.64838e+07	2.43754	0.0310325
P50991	T-complex protein 1 subunit delta OS=Homo sapiens OX=9606 GN=CCT4 PE=1 SV=4 - [TCPD_HUMAN]	8.17718e+07	7.86858e+07	8.75073e+07	2.43779e+08	1.86992e+08	2.51992e+08	2.75346	0.00215034
O60506	Heterogeneous nuclear ribonucleoprotein Q OS=Homo sapiens OX=9606 GN=SYNCRIP PE=1 SV=2 - [HNRPQ_HUMAN]	1.67528e+07	6.2218e+06	3.62136e+06	5.10487e+08	4.06731e+08	1.67769e+08	40.7952	0.0254859
Q00403	Transcription initiation factor IIB OS=Homo sapiens OX=9606 GN=GTF2B PE=1 SV=1 - [TF2B_HUMAN]	1.02022e+08	6.06666e+07	3.70225e+07	4.23453e+07	4.89057e+07	5.76253e+07	0.74546	0.433967
Q9BYG3	MKI67 FHA domain-interacting nucleolar phosphoprotein OS=Homo sapiens OX=9606 GN=NIFK PE=1 SV=1 - [MK67I_HUMAN]	4.46894e+06	6.05376e+06	5.31007e+06	6.04819e+07	6.49803e+07	5.24704e+07	11.2383	0.000126135
O75369	Filamin-B OS=Homo sapiens OX=9606 GN=FLNB PE=1 SV=2 - [FLNB_HUMAN]	4.50711e+07	2.85067e+07	2.09377e+07	2.13595e+08	3.73259e+08	2.29624e+08	8.63855	0.00934384
Q9NP64	Nucleolar protein of 40 kDa OS=Homo sapiens OX=9606 GN=ZCCHC17 PE=1 SV=1 - [NO40_HUMAN]	3.85306e+07	2.97441e+07	1.48319e+07	5.61634e+06	1.07363e+07	8.90139e+06	0.303876	0.0527246
O00148	ATP-dependent RNA helicase DDX39A OS=Homo sapiens OX=9606 GN=DDX39A PE=1 SV=2 - [DX39A_HUMAN]	1.17298e+08	9.36581e+07	8.01723e+07	5.03634e+08	4.32403e+08	3.79204e+08	4.51774	0.000819529
P42166	Lamina-associated polypeptide 2, isoform alpha OS=Homo sapiens OX=9606 GN=TMPO PE=1 SV=2 - [LAP2A_HUMAN]	4.14575e+06	1.42524e+07	1.1235e+07	1.99001e+08	2.30613e+08	2.21864e+08	21.9848	3.06113e-05
P00492	Hypoxanthine-guanine phosphoribosyltransferase OS=Homo sapiens OX=9606 GN=HPRT1 PE=1 SV=2 - [HPRT_HUMAN]	8.04299e+06	6.35121e+06	1.01502e+07	8.13704e+07	2.19771e+07	4.81222e+07	6.17126	0.0699349
Q9Y5S9	RNA-binding protein 8A OS=Homo sapiens OX=9606 GN=RBM8A PE=1 SV=1 - [RBM8A_HUMAN]	1.02123e+07	8.6742e+06	4.98064e+06	3.32926e+07	6.72172e+06	3.0197e+07	2.94176	0.144417
Q14137	Ribosome biogenesis protein BOP1 OS=Homo sapiens OX=9606 GN=BOP1 PE=1 SV=2 - [BOP1_HUMAN]	7.06423e+06	7.56758e+06	1.94347e+06	1.9059e+08	1.93546e+08	2.16201e+08	36.2189	1.94973e-05
P50914	60S ribosomal protein L14 OS=Homo sapiens OX=9606 GN=RPL14 PE=1 SV=4 - [RL14_HUMAN]	8.17337e+06	1.14512e+07	6.42427e+06	2.11122e+08	2.13683e+08	1.43006e+08	21.7979	0.0014668
P46777	60S ribosomal protein L5 OS=Homo sapiens OX=9606 GN=RPL5 PE=1 SV=3 - [RL5_HUMAN]	9.84459e+06	3.0751e+06	4.98582e+06	1.01387e+08	1.04209e+08	9.03863e+07	16.5302	3.81216e-05
Q3B726	DNA-directed RNA polymerase I subunit RPA43 OS=Homo sapiens OX=9606 GN=POLR1F PE=1 SV=1 - [RPA43_HUMAN]	3.51269e+08	2.60697e+08	2.81137e+08	2.75657e+08	2.39641e+08	2.56823e+08	0.864538	0.241162
Q13838	Spliceosome RNA helicase DDX39B OS=Homo sapiens OX=9606 GN=DDX39B PE=1 SV=1 - [DX39B_HUMAN]	1.13743e+08	9.36581e+07	1.13184e+08	5.03634e+08	4.32403e+08	3.79204e+08	4.10262	0.000826888
O00541	Pescadillo homolog OS=Homo sapiens OX=9606 GN=PES1 PE=1 SV=1 - [PESC_HUMAN]	2.73e+07	3.61384e+06	1.59619e+06	1.94933e+08	1.64146e+08	1.63226e+08	16.0659	0.000252276
P50402	Emerin OS=Homo sapiens OX=9606 GN=EMD PE=1 SV=1 - [EMD_HUMAN]	7.60175e+06	5.14486e+06	1.06297e+07	7.15377e+07	3.4141e+07	6.94803e+07	7.493	0.0144542
P58107	Epiplakin OS=Homo sapiens OX=9606 GN=EPPK1 PE=1 SV=3 - [EPIPL_HUMAN]	3.71202e+07	7.10731e+07	2.66236e+07	1.41586e+08	1.88514e+08	2.35361e+08	4.19429	0.00896163
P55265	Double-stranded RNA-specific adenosine deaminase OS=Homo sapiens OX=9606 GN=ADAR PE=1 SV=4 - [DSRAD_HUMAN]	1.96143e+07	6.78962e+06	2.05399e+06	4.01187e+08	3.83247e+08	3.31883e+08	39.227	7.13769e-05
Q9NSB2	Keratin, type II cuticular Hb4 OS=Homo sapiens OX=9606 GN=KRT84 PE=2 SV=2 - [KRT84_HUMAN]	6.96222e+09	1.04748e+10	1.3938e+10	1.58375e+09	2.22537e+09	1.5586e+09	0.171083	0.0128485
Q8IY81	pre-rRNA 2'-O-ribose RNA methyltransferase FTSJ3 OS=Homo sapiens OX=9606 GN=FTSJ3 PE=1 SV=2 - [SPB1_HUMAN]	4.89813e+06	4.18762e+06	3.50917e+06	9.13119e+07	1.28679e+08	9.552e+07	25.0506	0.00103197
P62995	Transformer-2 protein homolog beta OS=Homo sapiens OX=9606 GN=TRA2B PE=1 SV=1 - [TRA2B_HUMAN]	7.11583e+06	1.07617e+07	4.19779e+06	2.06062e+08	1.7208e+08	8.22778e+07	20.8567	0.0167913
Q01082	Spectrin beta chain, non-erythrocytic 1 OS=Homo sapiens OX=9606 GN=SPTBN1 PE=1 SV=2 - [SPTB2_HUMAN]	8.44403e+06	1.07901e+07	8.6125e+06	1.39134e+08	2.00302e+08	1.99305e+08	19.3467	0.0010921
Q14103	Heterogeneous nuclear ribonucleoprotein D0 OS=Homo sapiens OX=9606 GN=HNRNPD PE=1 SV=1 - [HNRPD_HUMAN]	1.93308e+07	1.16014e+07	7.59964e+06	4.74588e+08	4.63277e+08	3.85405e+08	34.3422	0.000110303
P30048	Thioredoxin-dependent peroxide reductase, mitochondrial OS=Homo sapiens OX=9606 GN=PRDX3 PE=1 SV=3 - [PRDX3_HUMAN]	2.0135e+07	2.62661e+07	1.9437e+07	1.97695e+08	1.48388e+08	2.03535e+08	8.34802	0.000791927
P83731	60S ribosomal protein L24 OS=Homo sapiens OX=9606 GN=RPL24 PE=1 SV=1 - [RL24_HUMAN]	1.23275e+08	5.15332e+07	7.24107e+07	1.9469e+08	2.44473e+08	2.5166e+08	2.79438	0.00603628
P49756	RNA-binding protein 25 OS=Homo sapiens OX=9606 GN=RBM25 PE=1 SV=3 - [RBM25_HUMAN]	3.30414e+08	1.47139e+08	2.29211e+08	1.33809e+08	1.55528e+08	8.07187e+07	0.523592	0.122552
P68036	Ubiquitin-conjugating enzyme E2 L3 OS=Homo sapiens OX=9606 GN=UBE2L3 PE=1 SV=1 - [UB2L3_HUMAN]	8.57437e+06	4.23286e+06	6.43362e+06	2.95735e+07	6.06624e+07	5.69503e+07	7.64967	0.0124926
P36952	Serpin B5 OS=Homo sapiens OX=9606 GN=SERPINB5 PE=1 SV=2 - [SPB5_HUMAN]	1.32067e+08	1.18499e+08	1.11209e+08	3.19791e+06	4.39673e+06	5.32998e+06	0.0357255	4.58619e-05
P63000	Ras-related C3 botulinum toxin substrate 1 OS=Homo sapiens OX=9606 GN=RAC1 PE=1 SV=1 - [RAC1_HUMAN]	9.61244e+07	1.14717e+08	5.13051e+07	7.76456e+07	1.12037e+08	9.17879e+07	1.07372	0.777435
P39748	Flap endonuclease 1 OS=Homo sapiens OX=9606 GN=FEN1 PE=1 SV=1 - [FEN1_HUMAN]	9.92368e+08	2.87104e+08	2.80378e+08	1.58719e+08	2.20606e+08	1.91411e+08	0.365892	0.236383
O00763	Acetyl-CoA carboxylase 2 OS=Homo sapiens OX=9606 GN=ACACB PE=1 SV=3 - [ACACB_HUMAN]	1.45621e+10	1.17131e+10	1.15807e+10	6.42535e+08	3.30895e+08	3.93258e+08	0.0361024	0.000239529
Q9UHD1	Cysteine and histidine-rich domain-containing protein 1 OS=Homo sapiens OX=9606 GN=CHORDC1 PE=1 SV=2 - [CHRD1_HUMAN]	3.16939e+07	6.43038e+07	6.13432e+07	1.18622e+08	8.09541e+07	1.09594e+08	1.96498	0.0303523
P46781	40S ribosomal protein S9 OS=Homo sapiens OX=9606 GN=RPS9 PE=1 SV=3 - [RS9_HUMAN]	9.58184e+07	5.62676e+07	7.29144e+07	2.03337e+08	2.01416e+08	2.39791e+08	2.86463	0.00117702
Q9HB71	Calcyclin-binding protein OS=Homo sapiens OX=9606 GN=CACYBP PE=1 SV=2 - [CYBP_HUMAN]	1.78349e+07	4.57035e+07	3.71879e+06	8.47083e+07	1.23095e+08	1.27075e+08	4.97907	0.0081797
P35998	26S proteasome regulatory subunit 7 OS=Homo sapiens OX=9606 GN=PSMC2 PE=1 SV=3 - [PRS7_HUMAN]	1.52944e+07	7.39901e+06	1.85353e+08	3.36383e+07	3.41528e+07	5.53047e+07	0.591675	0.653573
Q5TEC6	Histone H3-7 OS=Homo sapiens OX=9606 GN=H3-7 PE=1 SV=1 - [H37_HUMAN]	7.87567e+07	7.04111e+07	5.90007e+06	4.48232e+09	5.56178e+09	5.90627e+09	102.861	0.000254392
Q15397	Pumilio homolog 3 OS=Homo sapiens OX=9606 GN=PUM3 PE=1 SV=3 - [PUM3_HUMAN]	3.51088e+06	6.10602e+06	3.09949e+06	1.25238e+08	1.35423e+08	9.67528e+07	28.1066	0.00058519
Q8N1F7	Nuclear pore complex protein Nup93 OS=Homo sapiens OX=9606 GN=NUP93 PE=1 SV=2 - [NUP93_HUMAN]	5.04212e+06	4.49534e+06	2.14434e+06	1.96316e+08	2.24121e+08	1.84955e+08	51.8234	7.08352e-05
P17096	High mobility group protein HMG-I/HMG-Y OS=Homo sapiens OX=9606 GN=HMGA1 PE=1 SV=3 - [HMGA1_HUMAN]	5.69317e+06	3.70643e+06	1.14417e+07	4.07481e+06	5.91809e+06	1.45697e+08	7.47027	0.392682
Q9BSD7	Cancer-related nucleoside-triphosphatase OS=Homo sapiens OX=9606 GN=NTPCR PE=1 SV=1 - [NTPCR_HUMAN]	2.80909e+07	1.86723e+07	1.08583e+07	4.59512e+07	1.62687e+07	7.94767e+06	1.21773	0.755953
Q6P6C2	RNA demethylase ALKBH5 OS=Homo sapiens OX=9606 GN=ALKBH5 PE=1 SV=2 - [ALKB5_HUMAN]	1.05437e+08	3.13443e+07	4.66411e+07	5.06093e+07	5.47669e+07	8.11113e+07	1.01671	0.968756
Q8WUM0	Nuclear pore complex protein Nup133 OS=Homo sapiens OX=9606 GN=NUP133 PE=1 SV=2 - [NU133_HUMAN]	8.208e+06	6.61496e+06	6.61862e+06	1.42215e+08	1.62729e+08	1.9112e+08	23.1356	0.000368153
Q05086	Ubiquitin-protein ligase E3A OS=Homo sapiens OX=9606 GN=UBE3A PE=1 SV=4 - [UBE3A_HUMAN]	7.9819e+06	3.55742e+06	3.71956e+06	1.46518e+08	1.57459e+08	1.24606e+08	28.0874	0.000146558
P52943	Cysteine-rich protein 2 OS=Homo sapiens OX=9606 GN=CRIP2 PE=1 SV=1 - [CRIP2_HUMAN]	7.31588e+06	1.78692e+08	2.67981e+06	1.04906e+07	1.16012e+08	4.1587e+06	0.692475	0.791188
Q96EP0	E3 ubiquitin-protein ligase RNF31 OS=Homo sapiens OX=9606 GN=RNF31 PE=1 SV=1 - [RNF31_HUMAN]	9.35561e+06	3.14472e+06	4.46553e+06	2.31125e+08	2.87543e+08	2.54325e+08	45.5617	0.000106673
P31947	14-3-3 protein sigma OS=Homo sapiens OX=9606 GN=SFN PE=1 SV=1 - [1433S_HUMAN]	2.009e+08	2.54713e+08	5.53201e+07	1.96234e+08	8.29593e+07	1.02036e+08	0.746143	0.565383
Q13185	Chromobox protein homolog 3 OS=Homo sapiens OX=9606 GN=CBX3 PE=1 SV=4 - [CBX3_HUMAN]	4.78239e+06	1.05358e+07	7.97139e+06	1.81237e+08	2.49264e+08	1.88188e+08	26.565	0.00078966
O75643	U5 small nuclear ribonucleoprotein 200 kDa helicase OS=Homo sapiens OX=9606 GN=SNRNP200 PE=1 SV=2 - [U520_HUMAN]	1.04703e+07	4.55431e+06	4.4507e+06	1.03496e+08	1.55625e+08	1.20137e+08	19.4738	0.00150323
P26641	Elongation factor 1-gamma OS=Homo sapiens OX=9606 GN=EEF1G PE=1 SV=3 - [EF1G_HUMAN]	1.34572e+08	1.00366e+08	9.8294e+07	3.4093e+08	3.03453e+08	3.11769e+08	2.86933	0.000221663
Q9UJ41	Rab5 GDP/GTP exchange factor OS=Homo sapiens OX=9606 GN=RABGEF1 PE=1 SV=3 - [RABX5_HUMAN]	2.22022e+07	2.29204e+06	4.38973e+06	1.21991e+08	9.00985e+07	6.02935e+07	9.43025	0.0127019
P28482	Mitogen-activated protein kinase 1 OS=Homo sapiens OX=9606 GN=MAPK1 PE=1 SV=3 - [MK01_HUMAN]	1.36699e+07	3.88228e+07	2.73834e+07	8.85752e+07	4.93245e+07	6.32078e+07	2.51774	0.0410741
P31930	Cytochrome b-c1 complex subunit 1, mitochondrial OS=Homo sapiens OX=9606 GN=UQCRC1 PE=1 SV=3 - [QCR1_HUMAN]	1.33673e+07	7.60386e+06	1.15733e+07	9.60445e+07	9.45583e+07	8.28099e+07	8.40121	5.89602e-05
P23526	Adenosylhomocysteinase OS=Homo sapiens OX=9606 GN=AHCY PE=1 SV=4 - [SAHH_HUMAN]	7.63064e+07	8.21695e+07	6.31509e+07	2.35198e+08	2.05904e+08	1.93559e+08	2.86365	0.000531001
P05187	Alkaline phosphatase, placental type OS=Homo sapiens OX=9606 GN=ALPP PE=1 SV=2 - [PPB1_HUMAN]	1.23671e+07	6.40559e+06	5.00487e+06	1.82814e+08	1.63748e+08	1.5555e+08	21.1171	4.50718e-05
Q5SSJ5	Heterochromatin protein 1-binding protein 3 OS=Homo sapiens OX=9606 GN=HP1BP3 PE=1 SV=1 - [HP1B3_HUMAN]	1.20581e+07	2.66721e+06	3.14385e+06	2.382e+08	2.15289e+08	1.2674e+08	32.471	0.00535021
P22234	Multifunctional protein ADE2 OS=Homo sapiens OX=9606 GN=PAICS PE=1 SV=3 - [PUR6_HUMAN]	2.81182e+07	2.85028e+07	1.25386e+08	1.24132e+08	2.07495e+08	1.03267e+08	2.38943	0.136897
P10696	Alkaline phosphatase, germ cell type OS=Homo sapiens OX=9606 GN=ALPG PE=1 SV=4 - [PPBN_HUMAN]	7.94491e+06	7.95814e+06	1.09581e+07	1.25804e+08	1.46894e+08	1.35245e+08	15.1871	3.31137e-05
P31153	S-adenosylmethionine synthase isoform type-2 OS=Homo sapiens OX=9606 GN=MAT2A PE=1 SV=1 - [METK2_HUMAN]	5.33432e+07	6.55095e+07	4.02644e+07	1.53568e+08	1.15123e+08	8.43977e+07	2.21905	0.0385457
Q02880	DNA topoisomerase 2-beta OS=Homo sapiens OX=9606 GN=TOP2B PE=1 SV=3 - [TOP2B_HUMAN]	9.7131e+06	1.00891e+07	6.17711e+06	2.81254e+08	3.00752e+08	3.12938e+08	34.4483	6.36192e-06
P31689	DnaJ homolog subfamily A member 1 OS=Homo sapiens OX=9606 GN=DNAJA1 PE=1 SV=2 - [DNJA1_HUMAN]	9.25609e+07	6.65115e+07	6.29455e+07	6.24674e+07	4.52527e+07	6.03772e+07	0.757134	0.171266
Q9NVP1	ATP-dependent RNA helicase DDX18 OS=Homo sapiens OX=9606 GN=DDX18 PE=1 SV=2 - [DDX18_HUMAN]	4.70545e+06	1.65413e+08	6.41714e+06	3.24535e+08	2.84076e+08	2.47354e+08	4.84867	0.0172335
Q9UG63	ATP-binding cassette sub-family F member 2 OS=Homo sapiens OX=9606 GN=ABCF2 PE=1 SV=2 - [ABCF2_HUMAN]	9.20236e+07	4.33341e+07	1.07928e+08	9.86284e+07	8.22094e+07	8.49199e+07	1.09237	0.728106
P55786	Puromycin-sensitive aminopeptidase OS=Homo sapiens OX=9606 GN=NPEPPS PE=1 SV=2 - [PSA_HUMAN]	7.73019e+07	3.38957e+07	5.75176e+07	1.66229e+08	1.60211e+08	1.48039e+08	2.81231	0.00171462
P13489	Ribonuclease inhibitor OS=Homo sapiens OX=9606 GN=RNH1 PE=1 SV=2 - [RINI_HUMAN]	6.18556e+07	1.64126e+07	6.22599e+07	1.41233e+08	1.65942e+08	1.19447e+08	3.03585	0.00931603
Q93009	Ubiquitin carboxyl-terminal hydrolase 7 OS=Homo sapiens OX=9606 GN=USP7 PE=1 SV=2 - [UBP7_HUMAN]	5.27559e+06	1.68916e+07	1.39658e+07	1.65299e+08	1.52296e+08	2.2883e+08	15.1226	0.00205993
Q07065	Cytoskeleton-associated protein 4 OS=Homo sapiens OX=9606 GN=CKAP4 PE=1 SV=2 - [CKAP4_HUMAN]	5.45812e+07	2.39862e+07	4.37749e+07	5.35294e+06	1.11876e+07	5.03688e+06	0.17637	0.0215905
Q16719	Kynureninase OS=Homo sapiens OX=9606 GN=KYNU PE=1 SV=1 - [KYNU_HUMAN]	3.59453e+07	7.86001e+06	2.64049e+07	6.42815e+07	3.83999e+07	7.40759e+07	2.51754	0.057693
P14678	Small nuclear ribonucleoprotein-associated proteins B and B' OS=Homo sapiens OX=9606 GN=SNRPB PE=1 SV=2 - [RSMB_HUMAN]	1.86642e+08	1.53941e+08	1.62752e+08	1.94609e+08	2.0599e+08	1.13893e+08	1.02217	0.909105
Q02978	Mitochondrial 2-oxoglutarate/malate carrier protein OS=Homo sapiens OX=9606 GN=SLC25A11 PE=1 SV=3 - [M2OM_HUMAN]	6.64101e+07	3.99502e+07	2.13185e+07	4.05444e+07	6.18256e+07	4.56528e+07	1.15934	0.665832
Q96DG6	Carboxymethylenebutenolidase homolog OS=Homo sapiens OX=9606 GN=CMBL PE=1 SV=1 - [CMBL_HUMAN]	3.60851e+07	4.35367e+06	3.12727e+07	4.22252e+07	6.19543e+07	3.44643e+07	1.93336	0.156862
P05198	Eukaryotic translation initiation factor 2 subunit 1 OS=Homo sapiens OX=9606 GN=EIF2S1 PE=1 SV=3 - [IF2A_HUMAN]	1.34537e+07	3.08813e+06	4.49971e+06	6.06246e+07	7.41632e+07	7.40502e+07	9.92503	0.000350492
O00116	Alkyldihydroxyacetonephosphate synthase, peroxisomal OS=Homo sapiens OX=9606 GN=AGPS PE=1 SV=1 - [ADAS_HUMAN]	1.11967e+08	6.56185e+07	6.93263e+07	9.69676e+07	8.80976e+07	8.3357e+07	1.08712	0.665646
P62258	14-3-3 protein epsilon OS=Homo sapiens OX=9606 GN=YWHAE PE=1 SV=1 - [1433E_HUMAN]	3.77526e+08	4.69028e+08	4.66194e+06	1.63476e+08	2.5962e+07	2.1117e+07	0.247357	0.226324
Q14697	Neutral alpha-glucosidase AB OS=Homo sapiens OX=9606 GN=GANAB PE=1 SV=3 - [GANAB_HUMAN]	8.01612e+07	9.54142e+07	5.76573e+07	1.02931e+08	1.14613e+08	5.61351e+07	1.17342	0.555161
O75694	Nuclear pore complex protein Nup155 OS=Homo sapiens OX=9606 GN=NUP155 PE=1 SV=1 - [NU155_HUMAN]	7.81221e+06	1.34258e+07	4.40619e+06	3.59222e+08	3.60894e+08	2.79099e+08	38.9646	0.000279434
P48643	T-complex protein 1 subunit epsilon OS=Homo sapiens OX=9606 GN=CCT5 PE=1 SV=1 - [TCPE_HUMAN]	8.22607e+07	9.27922e+07	6.68813e+07	1.01894e+08	6.6872e+07	8.79939e+07	1.06128	0.716151
P37108	Signal recognition particle 14 kDa protein OS=Homo sapiens OX=9606 GN=SRP14 PE=1 SV=2 - [SRP14_HUMAN]	2.17404e+08	1.61953e+08	7.08679e+06	3.40424e+06	1.63694e+07	2.91435e+08	0.805316	0.835323
Q9BRS2	Serine/threonine-protein kinase RIO1 OS=Homo sapiens OX=9606 GN=RIOK1 PE=1 SV=2 - [RIOK1_HUMAN]	1.4426e+08	1.21426e+08	4.38599e+07	1.64009e+08	1.97791e+08	1.18985e+08	1.55319	0.207522
P11021	Endoplasmic reticulum chaperone BiP OS=Homo sapiens OX=9606 GN=HSPA5 PE=1 SV=2 - [BIP_HUMAN]	1.38633e+08	9.27665e+07	1.08883e+08	2.44693e+08	2.47371e+08	2.31751e+08	2.1271	0.000859633
P35268	60S ribosomal protein L22 OS=Homo sapiens OX=9606 GN=RPL22 PE=1 SV=2 - [RL22_HUMAN]	1.62831e+08	134217728	8.13591e+07	1.38624e+08	1.80135e+08	1.77433e+08	1.31126	0.224795
Q15599	Na(+)/H(+) exchange regulatory cofactor NHE-RF2 OS=Homo sapiens OX=9606 GN=SLC9A3R2 PE=1 SV=2 - [NHRF2_HUMAN]	8.17831e+07	4.21871e+07	1.05942e+08	6.74306e+07	6.02237e+06	4.72529e+07	0.525008	0.232901
Q9Y5T5	Ubiquitin carboxyl-terminal hydrolase 16 OS=Homo sapiens OX=9606 GN=USP16 PE=1 SV=1 - [UBP16_HUMAN]	4.26369e+07	2.76026e+07	5.16548e+07	7.95247e+07	7.09058e+07	8.39135e+07	1.92252	0.0093617
Q13123	Protein Red OS=Homo sapiens OX=9606 GN=IK PE=1 SV=3 - [RED_HUMAN]	1.29702e+07	1.93067e+07	4.71286e+07	8.74164e+07	1.2272e+08	1.38068e+08	4.38514	0.00806732
O96000	NADH dehydrogenase [ubiquinone] 1 beta subcomplex subunit 10 OS=Homo sapiens OX=9606 GN=NDUFB10 PE=1 SV=3 - [NDUBA_HUMAN]	7.62391e+06	5.27559e+06	5.537e+07	9.57454e+07	6.36034e+07	6.75148e+07	3.32306	0.051246
P08754	Guanine nucleotide-binding protein G(i) subunit alpha-3 OS=Homo sapiens OX=9606 GN=GNAI3 PE=1 SV=3 - [GNAI3_HUMAN]	1.30141e+08	1.6539e+08	1.93452e+08	3.20911e+08	3.93858e+08	2.64795e+08	2.00327	0.0171038
Q9H0E2	Toll-interacting protein OS=Homo sapiens OX=9606 GN=TOLLIP PE=1 SV=1 - [TOLIP_HUMAN]	5.04108e+06	7.89167e+06	7.31943e+06	9.67863e+07	1.63113e+08	1.56577e+08	20.5646	0.00333561
Q9Y3I0	RNA-splicing ligase RtcB homolog OS=Homo sapiens OX=9606 GN=RTCB PE=1 SV=1 - [RTCB_HUMAN]	1.15862e+07	5.47403e+07	6.0654e+07	1.41792e+08	2.92548e+08	1.07906e+08	4.27031	0.0782272
Q5VT66	Mitochondrial amidoxime-reducing component 1 OS=Homo sapiens OX=9606 GN=MTARC1 PE=1 SV=1 - [MARC1_HUMAN]	6.51608e+07	5.6412e+07	5.45358e+07	8.26837e+07	7.01335e+07	6.86426e+07	1.25752	0.0521634
P13010	X-ray repair cross-complementing protein 5 OS=Homo sapiens OX=9606 GN=XRCC5 PE=1 SV=3 - [XRCC5_HUMAN]	5.43923e+07	6.98196e+06	2.84121e+07	1.21915e+08	1.11271e+08	8.79512e+07	3.57668	0.010494
P49757	Protein numb homolog OS=Homo sapiens OX=9606 GN=NUMB PE=1 SV=2 - [NUMB_HUMAN]	3.81128e+08	4.13353e+08	4.29892e+08	1.14146e+08	1.54893e+08	1.42976e+08	0.336511	0.000133438
Q9NW64	Pre-mRNA-splicing factor RBM22 OS=Homo sapiens OX=9606 GN=RBM22 PE=1 SV=1 - [RBM22_HUMAN]	2.58627e+08	1.44751e+08	2.86389e+08	1.15085e+07	7.69665e+06	2.11609e+07	0.0585213	0.00762871
P78386	Keratin, type II cuticular Hb5 OS=Homo sapiens OX=9606 GN=KRT85 PE=1 SV=1 - [KRT85_HUMAN]	6.23895e+07	6.18856e+07	7.75434e+07	9.48339e+07	8.68908e+07	2.70027e+07	1.03423	0.921729
Q9ULV4	Coronin-1C OS=Homo sapiens OX=9606 GN=CORO1C PE=1 SV=1 - [COR1C_HUMAN]	4.34514e+07	1.60581e+07	2.44021e+07	1.8913e+08	2.43054e+08	1.98271e+08	7.51332	0.000600018
Q99615	DnaJ homolog subfamily C member 7 OS=Homo sapiens OX=9606 GN=DNAJC7 PE=1 SV=2 - [DNJC7_HUMAN]	1.44829e+09	8.63624e+07	6.85285e+07	1.19597e+08	9.44273e+07	1.5344e+08	0.22921	0.418656
Q14690	Protein RRP5 homolog OS=Homo sapiens OX=9606 GN=PDCD11 PE=1 SV=3 - [RRP5_HUMAN]	6.89778e+06	1.78575e+06	4.79434e+06	1.45475e+08	1.65965e+08	1.62549e+08	35.168	1.91657e-05
Q8NAV1	Pre-mRNA-splicing factor 38A OS=Homo sapiens OX=9606 GN=PRPF38A PE=1 SV=1 - [PR38A_HUMAN]	7.06129e+06	2.68e+06	6.68316e+06	9.90395e+07	7.9376e+07	1.0757e+08	17.4122	0.000445822
A0JLT2	Mediator of RNA polymerase II transcription subunit 19 OS=Homo sapiens OX=9606 GN=MED19 PE=1 SV=2 - [MED19_HUMAN]	9.93508e+06	3.24188e+06	3.45528e+07	7.99075e+06	3.43356e+07	2.55745e+07	1.42261	0.612932
Q96GG9	DCN1-like protein 1 OS=Homo sapiens OX=9606 GN=DCUN1D1 PE=1 SV=1 - [DCNL1_HUMAN]	8.67481e+06	1.41972e+07	2.31599e+06	1.36394e+08	1.47404e+08	1.70654e+08	18.0424	0.000178567
P46734	Dual specificity mitogen-activated protein kinase kinase 3 OS=Homo sapiens OX=9606 GN=MAP2K3 PE=1 SV=2 - [MP2K3_HUMAN]	8.53879e+06	9.03003e+06	3.10309e+07	5.89832e+07	9.99517e+06	1.03685e+07	1.63266	0.597156
Q96C19	EF-hand domain-containing protein D2 OS=Homo sapiens OX=9606 GN=EFHD2 PE=1 SV=1 - [EFHD2_HUMAN]	1.04175e+07	1.24747e+07	7.45564e+06	6.11437e+07	7.90466e+07	6.53643e+07	6.7733	0.000476321
P22695	Cytochrome b-c1 complex subunit 2, mitochondrial OS=Homo sapiens OX=9606 GN=UQCRC2 PE=1 SV=3 - [QCR2_HUMAN]	3.52073e+08	1.52232e+08	1.21274e+08	8.84893e+07	6.50479e+07	1.48419e+08	0.482682	0.231158
P62847	40S ribosomal protein S24 OS=Homo sapiens OX=9606 GN=RPS24 PE=1 SV=1 - [RS24_HUMAN]	4.79059e+07	7.1252e+06	9.80102e+06	3.9302e+07	6.19039e+06	5.48048e+07	1.54703	0.576482
P02786	Transferrin receptor protein 1 OS=Homo sapiens OX=9606 GN=TFRC PE=1 SV=2 - [TFR1_HUMAN]	8.4867e+07	6.0591e+07	6.75241e+07	1.2711e+08	1.52496e+08	1.23027e+08	1.89046	0.00569573
P30101	Protein disulfide-isomerase A3 OS=Homo sapiens OX=9606 GN=PDIA3 PE=1 SV=4 - [PDIA3_HUMAN]	1.04175e+07	9.70906e+06	1.50337e+07	8.53152e+07	5.75615e+07	8.15737e+07	6.38364	0.00204967
Q9H8W3	Protein FAM204A OS=Homo sapiens OX=9606 GN=FAM204A PE=1 SV=1 - [F204A_HUMAN]	4.91436e+07	5.10745e+07	3.07333e+07	1.53294e+07	6.06804e+06	1.66509e+07	0.290554	0.0131644
Q14244	Ensconsin OS=Homo sapiens OX=9606 GN=MAP7 PE=1 SV=1 - [MAP7_HUMAN]	2.36621e+08	2.81723e+08	1.81325e+08	1.91358e+08	2.58269e+08	2.36571e+08	0.980749	0.904364
P07741	Adenine phosphoribosyltransferase OS=Homo sapiens OX=9606 GN=APRT PE=1 SV=2 - [APT_HUMAN]	3.61978e+07	1.27068e+07	3.05591e+07	4.64122e+07	4.64669e+07	4.98642e+07	1.79633	0.0423392
Q6P1L8	39S ribosomal protein L14, mitochondrial OS=Homo sapiens OX=9606 GN=MRPL14 PE=1 SV=1 - [RM14_HUMAN]	4.01974e+07	4.09994e+07	2.07556e+07	6.23691e+06	5.13407e+07	4.02699e+07	0.959737	0.932149
P82933	28S ribosomal protein S9, mitochondrial OS=Homo sapiens OX=9606 GN=MRPS9 PE=1 SV=2 - [RT09_HUMAN]	3.74198e+07	5.33543e+07	5.96947e+07	1.81476e+08	3.79527e+07	7.6086e+06	1.50886	0.661255
Q15424	Scaffold attachment factor B1 OS=Homo sapiens OX=9606 GN=SAFB PE=1 SV=4 - [SAFB1_HUMAN]	6.07604e+06	6.27116e+06	1.20489e+07	1.50334e+08	2.04496e+08	1.96084e+08	22.5821	0.000490128
O75533	Splicing factor 3B subunit 1 OS=Homo sapiens OX=9606 GN=SF3B1 PE=1 SV=3 - [SF3B1_HUMAN]	7.92292e+06	1.686e+07	4.63584e+06	2.48746e+08	3.46097e+08	2.47319e+08	28.6267	0.00118512
P25311	Zinc-alpha-2-glycoprotein OS=Homo sapiens OX=9606 GN=AZGP1 PE=1 SV=2 - [ZA2G_HUMAN]	5.13087e+07	2.63852e+06	2.47959e+07	1.05256e+07	4.62974e+06	5.98865e+06	0.268519	0.24721
Q8IX18	Probable ATP-dependent RNA helicase DHX40 OS=Homo sapiens OX=9606 GN=DHX40 PE=1 SV=2 - [DHX40_HUMAN]	7.86803e+07	6.17956e+07	6.3997e+07	1.18122e+08	1.01831e+08	1.01198e+08	1.57063	0.00711303
Q16629	Serine/arginine-rich splicing factor 7 OS=Homo sapiens OX=9606 GN=SRSF7 PE=1 SV=1 - [SRSF7_HUMAN]	9.21786e+06	7.35452e+06	8.60892e+06	1.16665e+08	1.74808e+08	9.33082e+07	15.2805	0.00778568
P04439	HLA class I histocompatibility antigen, A alpha chain OS=Homo sapiens OX=9606 GN=HLA-A PE=1 SV=2 - [HLAA_HUMAN]	7.6981e+07	8.98802e+07	1.3488e+08	6.58783e+07	4.97537e+07	8.45616e+07	0.663461	0.169549
O15067	Phosphoribosylformylglycinamidine synthase OS=Homo sapiens OX=9606 GN=PFAS PE=1 SV=4 - [PUR4_HUMAN]	3.20051e+07	9.73669e+06	6.92412e+06	1.24356e+08	1.30466e+08	1.04108e+08	7.37538	0.000775626
Q16881	Thioredoxin reductase 1, cytoplasmic OS=Homo sapiens OX=9606 GN=TXNRD1 PE=1 SV=3 - [TRXR1_HUMAN]	9.58735e+06	5.00199e+07	1.54425e+07	1.33633e+08	1.15259e+08	1.35067e+08	5.11605	0.00188755
Q00535	Cyclin-dependent-like kinase 5 OS=Homo sapiens OX=9606 GN=CDK5 PE=1 SV=3 - [CDK5_HUMAN]	7.68424e+07	9.7311e+07	1.87316e+08	8.35305e+07	1.15379e+08	9.01547e+07	0.799691	0.531611
P35232	Prohibitin 1 OS=Homo sapiens OX=9606 GN=PHB1 PE=1 SV=1 - [PHB1_HUMAN]	6.11522e+07	3.3166e+07	4.34785e+07	4.56243e+07	6.65622e+07	2.57274e+07	1.00085	0.997957
P49368	T-complex protein 1 subunit gamma OS=Homo sapiens OX=9606 GN=CCT3 PE=1 SV=4 - [TCPG_HUMAN]	9.9342e+07	8.42165e+07	9.19279e+07	1.15835e+08	9.39832e+07	1.18483e+08	1.19171	0.119268
P34897	Serine hydroxymethyltransferase, mitochondrial OS=Homo sapiens OX=9606 GN=SHMT2 PE=1 SV=3 - [GLYM_HUMAN]	9.19216e+07	1.17241e+08	2.67091e+06	9.16988e+07	7.55642e+07	6.23765e+07	1.08406	0.876249
Q9UMS4	Pre-mRNA-processing factor 19 OS=Homo sapiens OX=9606 GN=PRPF19 PE=1 SV=1 - [PRP19_HUMAN]	4.61596e+06	1.97497e+06	7.12076e+06	5.32065e+07	1.04534e+08	8.75316e+07	17.8878	0.00703836
Q16186	Proteasomal ubiquitin receptor ADRM1 OS=Homo sapiens OX=9606 GN=ADRM1 PE=1 SV=2 - [ADRM1_HUMAN]	5.79027e+06	1.27925e+07	7.77171e+06	1.54197e+08	1.42679e+08	1.4597e+08	16.8034	4.15015e-06
P14868	Aspartate--tRNA ligase, cytoplasmic OS=Homo sapiens OX=9606 GN=DARS1 PE=1 SV=2 - [SYDC_HUMAN]	1.91521e+07	1.64593e+07	1.28797e+07	6.45449e+07	4.02895e+07	6.50254e+07	3.5029	0.0084259
Q9H4F8	SPARC-related modular calcium-binding protein 1 OS=Homo sapiens OX=9606 GN=SMOC1 PE=1 SV=1 - [SMOC1_HUMAN]	1.54582e+08	1.63079e+08	1.48388e+08	8.95941e+07	9.96385e+07	9.99082e+07	0.620407	0.000412549
Q9H9J2	39S ribosomal protein L44, mitochondrial OS=Homo sapiens OX=9606 GN=MRPL44 PE=1 SV=1 - [RM44_HUMAN]	2.67846e+07	3.34685e+07	2.91118e+07	3.47191e+06	9.69225e+06	6.45909e+06	0.219586	0.00094138
P08243	Asparagine synthetase [glutamine-hydrolyzing] OS=Homo sapiens OX=9606 GN=ASNS PE=1 SV=4 - [ASNS_HUMAN]	1.71999e+07	6.04789e+06	7.43176e+07	6.9649e+07	1.78188e+07	1.13625e+08	2.0611	0.377976
P46087	Probable 28S rRNA (cytosine(4447)-C(5))-methyltransferase OS=Homo sapiens OX=9606 GN=NOP2 PE=1 SV=2 - [NOP2_HUMAN]	9.14467e+06	3.60183e+06	6.8973e+06	2.82035e+08	2.85279e+08	2.5112e+08	41.6637	1.73088e-05
Q8TEM1	Nuclear pore membrane glycoprotein 210 OS=Homo sapiens OX=9606 GN=NUP210 PE=1 SV=3 - [PO210_HUMAN]	7.67322e+06	5.4658e+06	3.72472e+06	4.45392e+08	3.38622e+08	3.49205e+08	67.1986	0.000395098
P04899	Guanine nucleotide-binding protein G(i) subunit alpha-2 OS=Homo sapiens OX=9606 GN=GNAI2 PE=1 SV=3 - [GNAI2_HUMAN]	1.30141e+08	1.6539e+08	1.93452e+08	2.82759e+08	3.93858e+08	2.83171e+08	1.96283	0.0190348
O95299	NADH dehydrogenase [ubiquinone] 1 alpha subcomplex subunit 10, mitochondrial OS=Homo sapiens OX=9606 GN=NDUFA10 PE=1 SV=1 - [NDUAA_HUMAN]	1.793e+08	1.50804e+08	1.69793e+08	2.25586e+08	134217728	1.8275e+08	1.08533	0.63466
O60784	Target of Myb protein 1 OS=Homo sapiens OX=9606 GN=TOM1 PE=1 SV=2 - [TOM1_HUMAN]	1.49144e+07	7.32095e+06	4.07735e+06	1.0603e+08	5.53776e+07	9.0136e+07	9.5598	0.0079985
P61088	Ubiquitin-conjugating enzyme E2 N OS=Homo sapiens OX=9606 GN=UBE2N PE=1 SV=1 - [UBE2N_HUMAN]	6.44121e+06	9.06641e+06	5.20079e+06	1.46721e+08	1.21746e+08	1.47067e+08	20.066	9.97006e-05
Q7Z6Z7	E3 ubiquitin-protein ligase HUWE1 OS=Homo sapiens OX=9606 GN=HUWE1 PE=1 SV=3 - [HUWE1_HUMAN]	8.50866e+06	7.10843e+06	6.18525e+06	2.96037e+08	5.44856e+08	4.74423e+08	60.3291	0.00433258
P11388	DNA topoisomerase 2-alpha OS=Homo sapiens OX=9606 GN=TOP2A PE=1 SV=3 - [TOP2A_HUMAN]	1.36557e+07	1.34556e+07	3.93137e+06	2.82544e+08	3.00169e+08	3.14002e+08	28.8866	7.4556e-06
P54886	Delta-1-pyrroline-5-carboxylate synthase OS=Homo sapiens OX=9606 GN=ALDH18A1 PE=1 SV=2 - [P5CS_HUMAN]	2.02353e+08	3.31384e+07	9.38353e+06	2.43745e+08	1.15619e+08	1.12348e+08	1.92634	0.368017
Q9Y4W2	Ribosomal biogenesis protein LAS1L OS=Homo sapiens OX=9606 GN=LAS1L PE=1 SV=2 - [LAS1L_HUMAN]	1.27677e+07	2.91891e+06	1.82214e+06	1.41802e+08	8.87412e+07	1.3824e+08	21.0627	0.00258084
Q9Y221	60S ribosome subunit biogenesis protein NIP7 homolog OS=Homo sapiens OX=9606 GN=NIP7 PE=1 SV=1 - [NIP7_HUMAN]	1.1632e+07	2.87374e+06	1.17162e+07	8.92222e+07	5.2405e+07	7.98838e+07	8.44754	0.00470003
Q9NZ01	Very-long-chain enoyl-CoA reductase OS=Homo sapiens OX=9606 GN=TECR PE=1 SV=1 - [TECR_HUMAN]	1.21241e+08	7.72537e+07	8.50908e+07	9.08259e+07	1.35414e+08	9.0807e+07	1.11799	0.608727
Q9BYM8	RanBP-type and C3HC4-type zinc finger-containing protein 1 OS=Homo sapiens OX=9606 GN=RBCK1 PE=1 SV=2 - [HOIL1_HUMAN]	2.10337e+07	2.47518e+06	6.02404e+06	5.56778e+07	1.12918e+08	3.46488e+07	6.88197	0.0738884
P53396	ATP-citrate synthase OS=Homo sapiens OX=9606 GN=ACLY PE=1 SV=3 - [ACLY_HUMAN]	8.50377e+07	6.30416e+07	5.77493e+07	1.442e+08	1.39057e+08	1.32049e+08	2.01773	0.00152964
P12004	Proliferating cell nuclear antigen OS=Homo sapiens OX=9606 GN=PCNA PE=1 SV=1 - [PCNA_HUMAN]	7.98949e+07	3.93429e+07	7.53878e+06	6.33745e+07	5.56701e+07	8.85323e+07	1.63734	0.309695
P53621	Coatomer subunit alpha OS=Homo sapiens OX=9606 GN=COPA PE=1 SV=2 - [COPA_HUMAN]	1.05993e+08	8.03447e+07	7.17612e+07	1.13837e+08	1.17787e+08	8.04116e+07	1.20897	0.315835
P57740	Nuclear pore complex protein Nup107 OS=Homo sapiens OX=9606 GN=NUP107 PE=1 SV=1 - [NU107_HUMAN]	1.29361e+07	6.15232e+06	2.13514e+06	1.74143e+08	1.74023e+08	1.27075e+08	22.3921	0.000694061
P42766	60S ribosomal protein L35 OS=Homo sapiens OX=9606 GN=RPL35 PE=1 SV=2 - [RL35_HUMAN]	5.27878e+07	6.18096e+06	4.58757e+06	4.55589e+06	1.39646e+08	3.98203e+07	2.89542	0.407537
P62917	60S ribosomal protein L8 OS=Homo sapiens OX=9606 GN=RPL8 PE=1 SV=2 - [RL8_HUMAN]	4.58462e+07	8.29133e+07	5.37403e+07	9.29982e+07	1.2227e+08	2.40456e+08	2.49713	0.121523
O95433	Activator of 90 kDa heat shock protein ATPase homolog 1 OS=Homo sapiens OX=9606 GN=AHSA1 PE=1 SV=1 - [AHSA1_HUMAN]	1.23505e+08	1.35837e+08	7.30257e+07	7.62588e+07	5.28024e+07	9.35802e+07	0.669864	0.180232
P41091	Eukaryotic translation initiation factor 2 subunit 3 OS=Homo sapiens OX=9606 GN=EIF2S3 PE=1 SV=3 - [IF2G_HUMAN]	3.24339e+07	3.35847e+07	4.43429e+07	1.08408e+08	1.76098e+08	5.66079e+07	3.09088	0.0916144
P47756	F-actin-capping protein subunit beta OS=Homo sapiens OX=9606 GN=CAPZB PE=1 SV=4 - [CAPZB_HUMAN]	3.0306e+07	6.24328e+07	2.41301e+06	2.03239e+08	2.21818e+08	1.45819e+08	5.99963	0.00524346
Q14974	Importin subunit beta-1 OS=Homo sapiens OX=9606 GN=KPNB1 PE=1 SV=2 - [IMB1_HUMAN]	7.42469e+06	1.56972e+07	5.35395e+07	5.05067e+08	4.83017e+08	4.06985e+08	18.1978	0.000182187
Q562R1	Beta-actin-like protein 2 OS=Homo sapiens OX=9606 GN=ACTBL2 PE=1 SV=2 - [ACTBL_HUMAN]	2.30257e+09	1.96707e+09	1.77614e+09	5.21384e+09	4.28753e+09	4.57302e+09	2.32797	0.00104163
P28340	DNA polymerase delta catalytic subunit OS=Homo sapiens OX=9606 GN=POLD1 PE=1 SV=2 - [DPOD1_HUMAN]	4.53689e+07	1.84383e+07	8.0324e+06	5.26452e+07	1.02546e+08	4.01612e+07	2.71929	0.135503
Q1KMD3	Heterogeneous nuclear ribonucleoprotein U-like protein 2 OS=Homo sapiens OX=9606 GN=HNRNPUL2 PE=1 SV=1 - [HNRL2_HUMAN]	2.44686e+06	3.44507e+06	5.00105e+06	2.36375e+08	1.7666e+08	2.12016e+08	57.3811	0.000295339
Q6P2Q9	Pre-mRNA-processing-splicing factor 8 OS=Homo sapiens OX=9606 GN=PRPF8 PE=1 SV=2 - [PRP8_HUMAN]	8.23764e+06	6.81792e+06	1.17528e+07	7.14188e+07	1.06605e+08	5.62041e+08	27.6058	0.206857
P41743	Protein kinase C iota type OS=Homo sapiens OX=9606 GN=PRKCI PE=1 SV=2 - [KPCI_HUMAN]	6.17283e+06	7.96642e+06	7.96808e+06	1.89169e+08	1.55744e+08	1.42887e+08	22.0651	0.000356426
P56192	Methionine--tRNA ligase, cytoplasmic OS=Homo sapiens OX=9606 GN=MARS1 PE=1 SV=2 - [SYMC_HUMAN]	7.28083e+07	8.20557e+07	6.65299e+07	2.52726e+08	2.12163e+08	1.43214e+08	2.7467	0.0162236
Q96DI7	U5 small nuclear ribonucleoprotein 40 kDa protein OS=Homo sapiens OX=9606 GN=SNRNP40 PE=1 SV=1 - [SNR40_HUMAN]	1.13548e+07	4.27235e+06	7.59912e+06	4.26931e+07	1.27333e+07	3.67089e+06	2.54441	0.374262
Q15276	Rab GTPase-binding effector protein 1 OS=Homo sapiens OX=9606 GN=RABEP1 PE=1 SV=2 - [RABE1_HUMAN]	9.01565e+06	7.04906e+06	5.14022e+06	1.2114e+08	1.37171e+08	1.04216e+08	17.0963	0.000287868
P11940	Polyadenylate-binding protein 1 OS=Homo sapiens OX=9606 GN=PABPC1 PE=1 SV=2 - [PABP1_HUMAN]	1.40893e+07	1.36958e+06	3.06998e+06	1.04122e+08	7.52141e+07	4.92357e+07	12.336	0.0128131
Q6UN15	Pre-mRNA 3'-end-processing factor FIP1 OS=Homo sapiens OX=9606 GN=FIP1L1 PE=1 SV=1 - [FIP1_HUMAN]	2.2972e+08	1.55528e+08	1.24158e+08	1.88071e+08	1.73733e+08	1.85135e+08	1.07368	0.71239
P78549	Endonuclease III-like protein 1 OS=Homo sapiens OX=9606 GN=NTHL1 PE=1 SV=2 - [NTH_HUMAN]	1.34786e+08	1.10734e+07	6.65853e+07	4.39704e+06	6.20703e+07	1.33235e+08	0.940019	0.938415
Q8IWA0	WD repeat-containing protein 75 OS=Homo sapiens OX=9606 GN=WDR75 PE=1 SV=1 - [WDR75_HUMAN]	7.86165e+06	4.96444e+06	3.96366e+06	8.02445e+07	1.02227e+08	9.91768e+07	16.775	0.000224254
Q9BVI4	Nucleolar complex protein 4 homolog OS=Homo sapiens OX=9606 GN=NOC4L PE=1 SV=1 - [NOC4L_HUMAN]	2.44241e+07	7.01835e+06	7.57545e+06	8.5754e+07	6.56458e+07	3.4757e+07	4.77107	0.0367122
Q9NWT1	p21-activated protein kinase-interacting protein 1 OS=Homo sapiens OX=9606 GN=PAK1IP1 PE=1 SV=2 - [PK1IP_HUMAN]	8.04187e+06	4.18907e+06	1.07946e+07	4.25985e+07	4.97261e+07	4.06767e+07	5.77626	0.000397784
Q5QJE6	Deoxynucleotidyltransferase terminal-interacting protein 2 OS=Homo sapiens OX=9606 GN=DNTTIP2 PE=1 SV=2 - [TDIF2_HUMAN]	1.70752e+07	4.34252e+06	1.40581e+07	6.91296e+07	8.3687e+07	5.97196e+07	5.99101	0.00176564
Q9Y508	E3 ubiquitin-protein ligase RNF114 OS=Homo sapiens OX=9606 GN=RNF114 PE=1 SV=1 - [RN114_HUMAN]	5.45028e+06	4.32899e+06	3.76573e+06	6.0327e+07	9.34376e+07	7.36152e+07	16.787	0.00177918
P46779	60S ribosomal protein L28 OS=Homo sapiens OX=9606 GN=RPL28 PE=1 SV=3 - [RL28_HUMAN]	6.60612e+07	1.82223e+07	6.45193e+06	1.77338e+07	9.85415e+06	3.07845e+07	0.643326	0.604606
Q08945	FACT complex subunit SSRP1 OS=Homo sapiens OX=9606 GN=SSRP1 PE=1 SV=1 - [SSRP1_HUMAN]	1.59882e+07	4.7244e+06	2.8389e+06	2.57001e+08	3.10281e+08	2.35459e+08	34.0846	0.000328006
Q14247	Src substrate cortactin OS=Homo sapiens OX=9606 GN=CTTN PE=1 SV=2 - [SRC8_HUMAN]	7.47775e+07	6.39792e+07	5.96203e+07	2.41241e+08	9.96178e+07	9.58384e+07	2.20135	0.1737
P17812	CTP synthase 1 OS=Homo sapiens OX=9606 GN=CTPS1 PE=1 SV=2 - [PYRG1_HUMAN]	5.15118e+07	3.33411e+07	3.25195e+07	1.40939e+08	1.41164e+08	1.1494e+08	3.38276	0.000950944
Q06210	Glutamine--fructose-6-phosphate aminotransferase [isomerizing] 1 OS=Homo sapiens OX=9606 GN=GFPT1 PE=1 SV=3 - [GFPT1_HUMAN]	6.68211e+07	6.97553e+07	6.39305e+07	8.53685e+07	8.79146e+07	1.02298e+08	1.37442	0.0106289
P01857	Immunoglobulin heavy constant gamma 1 OS=Homo sapiens OX=9606 GN=IGHG1 PE=1 SV=1 - [IGHG1_HUMAN]	9.44993e+07	6.56822e+07	5.54468e+07	7.16383e+06	6.94335e+06	8.54352e+06	0.105045	0.00533839
Q8NCN4	E3 ubiquitin-protein ligase RNF169 OS=Homo sapiens OX=9606 GN=RNF169 PE=1 SV=2 - [RN169_HUMAN]	5.85972e+06	3.18619e+06	8.98321e+06	2.57149e+07	7.29194e+07	6.96973e+07	9.33665	0.0307692
P00505	Aspartate aminotransferase, mitochondrial OS=Homo sapiens OX=9606 GN=GOT2 PE=1 SV=3 - [AATM_HUMAN]	6.96394e+07	6.68581e+07	9.63713e+07	6.03897e+07	9.18324e+07	9.38465e+07	1.05668	0.774398
P09211	Glutathione S-transferase P OS=Homo sapiens OX=9606 GN=GSTP1 PE=1 SV=2 - [GSTP1_HUMAN]	2.11034e+08	1.17371e+08	1.21401e+08	9.73399e+06	7.05284e+07	8.30456e+07	0.363063	0.0660349
Q96A35	39S ribosomal protein L24, mitochondrial OS=Homo sapiens OX=9606 GN=MRPL24 PE=1 SV=1 - [RM24_HUMAN]	8.80427e+07	9.47748e+07	9.79403e+07	8.3687e+07	5.09543e+07	1.04426e+08	0.851506	0.429732
P49366	Deoxyhypusine synthase OS=Homo sapiens OX=9606 GN=DHPS PE=1 SV=1 - [DHYS_HUMAN]	1.08666e+07	6.96407e+06	1.8205e+06	1.31702e+08	9.92387e+07	6.67054e+07	15.1465	0.00809446
Q8IZV5	Retinol dehydrogenase 10 OS=Homo sapiens OX=9606 GN=RDH10 PE=1 SV=1 - [RDH10_HUMAN]	4.92776e+06	3.56031e+07	1.03104e+07	6.70996e+07	8.18796e+07	5.17122e+07	3.94741	0.0177604
P16152	Carbonyl reductase [NADPH] 1 OS=Homo sapiens OX=9606 GN=CBR1 PE=1 SV=3 - [CBR1_HUMAN]	1.00661e+07	1.28565e+07	7.48878e+06	4.44238e+06	9.50991e+06	1.07498e+07	0.812262	0.48478
Q9Y265	RuvB-like 1 OS=Homo sapiens OX=9606 GN=RUVBL1 PE=1 SV=1 - [RUVB1_HUMAN]	6.20101e+07	4.32081e+07	4.18986e+07	1.32517e+08	1.12076e+08	1.15331e+08	2.44651	0.00144787
Q9Y3F4	Serine-threonine kinase receptor-associated protein OS=Homo sapiens OX=9606 GN=STRAP PE=1 SV=1 - [STRAP_HUMAN]	1.27077e+07	5.887e+06	7.6828e+06	8.80139e+06	3.07845e+07	4.74301e+07	3.31143	0.149603
Q8TAF3	WD repeat-containing protein 48 OS=Homo sapiens OX=9606 GN=WDR48 PE=1 SV=1 - [WDR48_HUMAN]	9.79607e+07	6.62814e+07	1.09087e+08	6.66915e+07	1.76269e+08	8.73376e+07	1.20843	0.625569
Q8TED0	U3 small nucleolar RNA-associated protein 15 homolog OS=Homo sapiens OX=9606 GN=UTP15 PE=1 SV=3 - [UTP15_HUMAN]	1.20056e+07	2.75057e+06	3.23784e+06	6.8192e+07	7.50371e+07	7.5402e+07	12.1502	6.20613e-05
Q12874	Splicing factor 3A subunit 3 OS=Homo sapiens OX=9606 GN=SF3A3 PE=1 SV=1 - [SF3A3_HUMAN]	8.95524e+06	4.5169e+06	8.17224e+06	4.72202e+07	6.23821e+06	3.82194e+07	4.23564	0.135447
P46013	Proliferation marker protein Ki-67 OS=Homo sapiens OX=9606 GN=MKI67 PE=1 SV=2 - [KI67_HUMAN]	1.40435e+07	6.9994e+06	3.42649e+06	2.14648e+08	3.1192e+08	2.18385e+08	30.4443	0.00168097
P53007	Tricarboxylate transport protein, mitochondrial OS=Homo sapiens OX=9606 GN=SLC25A1 PE=1 SV=2 - [TXTP_HUMAN]	2.11049e+08	1.54058e+08	9.85737e+07	1.52549e+08	1.51317e+08	1.55194e+08	0.990037	0.964468
Q92621	Nuclear pore complex protein Nup205 OS=Homo sapiens OX=9606 GN=NUP205 PE=1 SV=3 - [NU205_HUMAN]	7.33467e+06	5.84957e+06	3.23874e+06	1.47445e+08	2.07365e+08	1.82776e+08	32.7338	0.000569433
P61254	60S ribosomal protein L26 OS=Homo sapiens OX=9606 GN=RPL26 PE=1 SV=1 - [RL26_HUMAN]	1.11899e+07	5.33035e+06	1.60425e+07	7.72338e+06	5.40401e+06	5.68044e+07	2.14759	0.505386
P49588	Alanine--tRNA ligase, cytoplasmic OS=Homo sapiens OX=9606 GN=AARS1 PE=1 SV=2 - [SYAC_HUMAN]	3.65787e+07	6.75582e+06	3.07233e+06	6.88475e+07	1.04353e+08	7.26319e+07	5.29734	0.0126707
P05166	Propionyl-CoA carboxylase beta chain, mitochondrial OS=Homo sapiens OX=9606 GN=PCCB PE=1 SV=3 - [PCCB_HUMAN]	6.37579e+07	4.31184e+07	5.62169e+07	6.8269e+06	8.9963e+06	9.78744e+06	0.157031	0.00167413
P61026	Ras-related protein Rab-10 OS=Homo sapiens OX=9606 GN=RAB10 PE=1 SV=1 - [RAB10_HUMAN]	1.30069e+08	4.37636e+06	4.04217e+06	2.15472e+07	9.45517e+07	1.03095e+08	1.58277	0.614231
P06493	Cyclin-dependent kinase 1 OS=Homo sapiens OX=9606 GN=CDK1 PE=1 SV=3 - [CDK1_HUMAN]	1.77655e+08	1.79387e+08	1.36602e+08	9.21385e+07	2.84509e+08	1.19009e+08	1.00408	0.991848
Q9HA64	Ketosamine-3-kinase OS=Homo sapiens OX=9606 GN=FN3KRP PE=1 SV=2 - [KT3K_HUMAN]	6.73198e+06	5.38606e+06	7.71642e+06	6.75335e+07	5.90691e+07	7.07928e+07	9.95214	7.65418e-05
P31025	Lipocalin-1 OS=Homo sapiens OX=9606 GN=LCN1 PE=1 SV=1 - [LCN1_HUMAN]	5.3177e+07	3.94228e+06	1.23351e+08	9.95695e+07	1.14035e+08	9.93695e+07	1.73421	0.275369
Q9NSD9	Phenylalanine--tRNA ligase beta subunit OS=Homo sapiens OX=9606 GN=FARSB PE=1 SV=3 - [SYFB_HUMAN]	7.50853e+06	3.75141e+06	3.08e+06	5.53201e+07	8.03949e+07	5.26781e+07	13.1376	0.00290522
Q9UJS0	Calcium-binding mitochondrial carrier protein Aralar2 OS=Homo sapiens OX=9606 GN=SLC25A13 PE=1 SV=2 - [CMC2_HUMAN]	8.02334e+07	4.19219e+07	3.7641e+07	7.45911e+07	6.54051e+07	5.17014e+07	1.19964	0.519753
Q5UCC4	ER membrane protein complex subunit 10 OS=Homo sapiens OX=9606 GN=EMC10 PE=1 SV=1 - [EMC10_HUMAN]	2.08967e+08	1.14783e+07	1.09566e+07	5.57484e+06	1.71321e+07	9.44225e+06	0.138932	0.37122
Q15029	116 kDa U5 small nuclear ribonucleoprotein component OS=Homo sapiens OX=9606 GN=EFTUD2 PE=1 SV=1 - [U5S1_HUMAN]	3.06497e+08	4.08539e+08	4.32103e+08	4.61163e+08	6.87555e+08	4.52016e+08	1.39541	0.154065
P27695	DNA-(apurinic or apyrimidinic site) endonuclease OS=Homo sapiens OX=9606 GN=APEX1 PE=1 SV=2 - [APEX1_HUMAN]	6.40825e+06	8.83195e+06	4.8778e+06	3.75635e+06	1.15229e+07	1.88871e+07	1.6983	0.35848
Q9BXS6	Nucleolar and spindle-associated protein 1 OS=Homo sapiens OX=9606 GN=NUSAP1 PE=1 SV=1 - [NUSAP_HUMAN]	7.50371e+07	2.33805e+07	6.90338e+07	7.06409e+07	7.07059e+06	1.67064e+07	0.563853	0.396114
Q96DV4	39S ribosomal protein L38, mitochondrial OS=Homo sapiens OX=9606 GN=MRPL38 PE=1 SV=2 - [RM38_HUMAN]	4.69168e+07	7.07536e+07	5.0319e+07	2.89428e+07	4.1771e+07	4.28651e+07	0.676108	0.104961
P00390	Glutathione reductase, mitochondrial OS=Homo sapiens OX=9606 GN=GSR PE=1 SV=2 - [GSHR_HUMAN]	1.73256e+07	4.42333e+06	3.13558e+06	6.87521e+07	5.76253e+07	1.00061e+08	9.09957	0.00759
P23193	Transcription elongation factor A protein 1 OS=Homo sapiens OX=9606 GN=TCEA1 PE=1 SV=2 - [TCEA1_HUMAN]	9.54028e+06	9.12315e+06	3.61878e+07	7.47205e+07	6.59435e+06	5.30188e+07	2.44905	0.294822
P61626	Lysozyme C OS=Homo sapiens OX=9606 GN=LYZ PE=1 SV=1 - [LYSC_HUMAN]	1.65689e+08	9.59913e+07	5.06454e+06	1.2597e+08	9.26508e+07	6.70438e+07	1.07093	0.904832
P62333	26S proteasome regulatory subunit 10B OS=Homo sapiens OX=9606 GN=PSMC6 PE=1 SV=1 - [PRS10_HUMAN]	1.0628e+08	6.95718e+07	6.38817e+07	1.52496e+08	1.3131e+08	1.73361e+08	1.90698	0.0157697
Q92552	28S ribosomal protein S27, mitochondrial OS=Homo sapiens OX=9606 GN=MRPS27 PE=1 SV=3 - [RT27_HUMAN]	5.6655e+07	6.67933e+07	7.51412e+07	7.63646e+07	5.86855e+07	9.76624e+07	1.17183	0.41334
P19013	Keratin, type II cytoskeletal 4 OS=Homo sapiens OX=9606 GN=KRT4 PE=1 SV=5 - [K2C4_HUMAN]	6.27427e+09	5.50235e+09	6.16776e+09	2.91248e+09	2.21537e+09	2.7071e+09	0.436624	0.000448684
Q6DCA0	AMMECR1-like protein OS=Homo sapiens OX=9606 GN=AMMECR1L PE=1 SV=1 - [AMERL_HUMAN]	9.95695e+07	6.38198e+07	4.85073e+07	4.53846e+07	4.04266e+07	6.25671e+07	0.700239	0.269938
P30740	Leukocyte elastase inhibitor OS=Homo sapiens OX=9606 GN=SERPINB1 PE=1 SV=1 - [ILEU_HUMAN]	1.93134e+07	7.15143e+06	1.80688e+07	7.72322e+07	5.66001e+07	6.56049e+07	4.47835	0.001912
P42704	Leucine-rich PPR motif-containing protein, mitochondrial OS=Homo sapiens OX=9606 GN=LRPPRC PE=1 SV=3 - [LPPRC_HUMAN]	3.84319e+07	2.34503e+07	3.34337e+07	7.72001e+07	7.99946e+07	6.85665e+07	2.36856	0.00147083
O95926	Pre-mRNA-splicing factor SYF2 OS=Homo sapiens OX=9606 GN=SYF2 PE=1 SV=1 - [SYF2_HUMAN]	3.30169e+07	2.42621e+07	2.19087e+07	6.75442e+06	8.21597e+06	4.9734e+06	0.251855	0.0048939
O76080	AN1-type zinc finger protein 5 OS=Homo sapiens OX=9606 GN=ZFAND5 PE=1 SV=1 - [ZFAN5_HUMAN]	5.38233e+06	3.97879e+06	2.09294e+06	5.55583e+07	4.6242e+07	1.6349e+07	10.3151	0.0400436
O94888	UBX domain-containing protein 7 OS=Homo sapiens OX=9606 GN=UBXN7 PE=1 SV=2 - [UBXN7_HUMAN]	9.42917e+06	4.48632e+06	7.78465e+06	1.35649e+08	1.34292e+08	1.47353e+08	19.23	7.33854e-06
Q13148	TAR DNA-binding protein 43 OS=Homo sapiens OX=9606 GN=TARDBP PE=1 SV=1 - [TADBP_HUMAN]	6.17613e+07	3.48076e+07	2.81748e+07	1.19406e+08	1.86113e+08	1.98822e+08	4.04301	0.00902478
P21964	Catechol O-methyltransferase OS=Homo sapiens OX=9606 GN=COMT PE=1 SV=2 - [COMT_HUMAN]	3.98976e+07	8.51987e+06	6.6416e+06	4.44445e+07	3.28935e+07	2.56615e+07	1.87071	0.256891
P60900	Proteasome subunit alpha type-6 OS=Homo sapiens OX=9606 GN=PSMA6 PE=1 SV=1 - [PSA6_HUMAN]	1.97411e+07	7.50177e+06	6.09798e+06	3.06185e+07	2.3885e+07	3.36313e+07	2.64344	0.0246656
P07384	Calpain-1 catalytic subunit OS=Homo sapiens OX=9606 GN=CAPN1 PE=1 SV=1 - [CAN1_HUMAN]	3.03123e+07	2.8414e+07	2.29056e+07	6.66777e+07	5.22237e+07	3.94713e+07	1.94008	0.0351097
Q9ULX3	RNA-binding protein NOB1 OS=Homo sapiens OX=9606 GN=NOB1 PE=1 SV=1 - [NOB1_HUMAN]	3.12321e+06	3.51672e+06	2.82765e+07	5.31586e+07	6.03186e+07	6.50479e+07	5.11293	0.00603153
Q14151	Scaffold attachment factor B2 OS=Homo sapiens OX=9606 GN=SAFB2 PE=1 SV=1 - [SAFB2_HUMAN]	9.51782e+06	9.6634e+06	6.43452e+06	1.29718e+08	1.71615e+08	1.536e+08	17.7599	0.000300187
Q9P2R3	Rabankyrin-5 OS=Homo sapiens OX=9606 GN=ANKFY1 PE=1 SV=2 - [ANFY1_HUMAN]	7.41272e+07	6.44466e+07	5.21983e+07	1.91504e+08	1.35395e+08	1.52771e+08	2.51436	0.00560406
Q96CU9	FAD-dependent oxidoreductase domain-containing protein 1 OS=Homo sapiens OX=9606 GN=FOXRED1 PE=1 SV=2 - [FXRD1_HUMAN]	1.12777e+08	6.12922e+07	4.6425e+07	3.02556e+07	1.04752e+08	7.51359e+07	0.953055	0.912669
Q14566	DNA replication licensing factor MCM6 OS=Homo sapiens OX=9606 GN=MCM6 PE=1 SV=1 - [MCM6_HUMAN]	3.20184e+07	3.09214e+07	6.16074e+07	2.13565e+08	2.02353e+08	1.19059e+08	4.29538	0.0121675
Q12872	Splicing factor, suppressor of white-apricot homolog OS=Homo sapiens OX=9606 GN=SFSWAP PE=1 SV=3 - [SFSWA_HUMAN]	8.21638e+07	6.59057e+07	7.73876e+07	1.22381e+08	8.99363e+07	1.03877e+08	1.40246	0.0457729
Q9Y295	Developmentally-regulated GTP-binding protein 1 OS=Homo sapiens OX=9606 GN=DRG1 PE=1 SV=1 - [DRG1_HUMAN]	6.29673e+07	3.8584e+07	6.91919e+07	6.57779e+07	4.50586e+07	5.91715e+07	0.995694	0.983534
P31040	Succinate dehydrogenase [ubiquinone] flavoprotein subunit, mitochondrial OS=Homo sapiens OX=9606 GN=SDHA PE=1 SV=2 - [SDHA_HUMAN]	2.6818e+07	1.90925e+07	2.27175e+07	3.62054e+07	7.66737e+06	33554432	1.12822	0.769964
P33316	Deoxyuridine 5'-triphosphate nucleotidohydrolase, mitochondrial OS=Homo sapiens OX=9606 GN=DUT PE=1 SV=4 - [DUT_HUMAN]	1.09104e+07	3.14494e+06	2.66093e+06	2.16626e+07	3.93866e+07	1.51751e+07	4.55988	0.0618784
P24752	Acetyl-CoA acetyltransferase, mitochondrial OS=Homo sapiens OX=9606 GN=ACAT1 PE=1 SV=1 - [THIL_HUMAN]	8.06867e+06	7.38247e+07	4.40427e+07	5.80865e+07	2.17936e+07	4.06176e+07	0.956816	0.937457
Q00059	Transcription factor A, mitochondrial OS=Homo sapiens OX=9606 GN=TFAM PE=1 SV=1 - [TFAM_HUMAN]	7.52715e+07	9.26701e+07	7.62112e+07	6.05952e+07	6.99538e+07	6.38242e+07	0.796113	0.0574666
Q9NRX2	39S ribosomal protein L17, mitochondrial OS=Homo sapiens OX=9606 GN=MRPL17 PE=1 SV=1 - [RM17_HUMAN]	4.1062e+07	2.70946e+07	7.39952e+06	1.02399e+07	7.63078e+06	7.63449e+06	0.337566	0.163988
P33991	DNA replication licensing factor MCM4 OS=Homo sapiens OX=9606 GN=MCM4 PE=1 SV=5 - [MCM4_HUMAN]	7.26484e+06	5.31007e+06	6.69383e+06	6.16843e+07	7.32944e+07	2.4582e+07	8.28081	0.0335053
Q92995	Ubiquitin carboxyl-terminal hydrolase 13 OS=Homo sapiens OX=9606 GN=USP13 PE=1 SV=2 - [UBP13_HUMAN]	3.15433e+06	4.9165e+06	1.00215e+07	3.14046e+08	2.81391e+08	2.5065e+08	46.7649	0.000115559
P62750	60S ribosomal protein L23a OS=Homo sapiens OX=9606 GN=RPL23A PE=1 SV=1 - [RL23A_HUMAN]	4.31103e+06	5.59459e+06	6.98134e+07	1.55463e+08	2.06992e+08	2.11503e+08	7.19977	0.00423565
Q99816	Tumor susceptibility gene 101 protein OS=Homo sapiens OX=9606 GN=TSG101 PE=1 SV=2 - [TS101_HUMAN]	3.82678e+06	3.36273e+06	2.99536e+06	3.11472e+07	2.79065e+07	2.84022e+07	8.58685	1.55439e-05
Q99848	Probable rRNA-processing protein EBP2 OS=Homo sapiens OX=9606 GN=EBNA1BP2 PE=1 SV=2 - [EBP2_HUMAN]	1.4989e+07	2.89153e+06	1.24152e+07	5.90568e+07	1.37898e+07	5.78615e+07	4.31441	0.094563
Q15050	Ribosome biogenesis regulatory protein homolog OS=Homo sapiens OX=9606 GN=RRS1 PE=1 SV=2 - [RRS1_HUMAN]	1.51352e+07	8.28977e+06	3.10422e+06	3.14684e+07	3.99779e+07	3.12467e+07	3.87095	0.00492467
Q92796	Disks large homolog 3 OS=Homo sapiens OX=9606 GN=DLG3 PE=1 SV=2 - [DLG3_HUMAN]	3.20445e+08	2.16321e+08	1.99139e+08	2.50894e+08	2.07222e+08	2.66655e+08	0.98487	0.93361
Q05519	Serine/arginine-rich splicing factor 11 OS=Homo sapiens OX=9606 GN=SRSF11 PE=1 SV=1 - [SRS11_HUMAN]	2.05135e+08	9.82872e+07	1.09724e+08	1.67049e+08	1.79312e+08	2.41341e+08	1.42251	0.228284
P62195	26S proteasome regulatory subunit 8 OS=Homo sapiens OX=9606 GN=PSMC5 PE=1 SV=1 - [PRS8_HUMAN]	8.81282e+07	7.38093e+07	6.83008e+07	1.09769e+08	9.96247e+07	8.60159e+07	1.28306	0.0747544
Q08379	Golgin subfamily A member 2 OS=Homo sapiens OX=9606 GN=GOLGA2 PE=1 SV=3 - [GOGA2_HUMAN]	1.48955e+08	4.39056e+07	3.29392e+07	6.26365e+07	9.13562e+07	6.63917e+07	0.976018	0.964449
P46063	ATP-dependent DNA helicase Q1 OS=Homo sapiens OX=9606 GN=RECQL PE=1 SV=3 - [RECQ1_HUMAN]	5.11737e+07	6.24371e+07	4.47669e+06	8.80305e+07	1.00861e+08	6.88761e+07	2.18286	0.0807333
Q6DRA6	Putative histone H2B type 2-D OS=Homo sapiens OX=9606 GN=H2BC19P PE=5 SV=3 - [H2B2D_HUMAN]	4.92298e+06	3.06552e+06	5.8512e+06	3.36586e+08	5.85462e+08	5.39594e+08	105.612	0.00322423
O60488	Long-chain-fatty-acid--CoA ligase 4 OS=Homo sapiens OX=9606 GN=ACSL4 PE=1 SV=2 - [ACSL4_HUMAN]	1.31092e+08	1.41802e+08	1.55873e+08	9.69475e+07	5.83893e+07	8.73679e+07	0.566053	0.0104213
Q9Y6C9	Mitochondrial carrier homolog 2 OS=Homo sapiens OX=9606 GN=MTCH2 PE=1 SV=1 - [MTCH2_HUMAN]	6.11988e+07	5.00799e+06	3.82466e+06	5.86977e+07	7.87786e+07	5.98356e+07	2.81747	0.101424
Q9Y3T9	Nucleolar complex protein 2 homolog OS=Homo sapiens OX=9606 GN=NOC2L PE=1 SV=4 - [NOC2L_HUMAN]	7.49553e+06	5.74629e+06	3.1655e+06	1.65988e+08	1.42699e+08	1.02909e+08	25.0861	0.00203887
P07814	Bifunctional glutamate/proline--tRNA ligase OS=Homo sapiens OX=9606 GN=EPRS1 PE=1 SV=5 - [SYEP_HUMAN]	5.54122e+07	1.23149e+07	2.3145e+07	6.37534e+07	7.22803e+07	4.56275e+07	1.99909	0.116314
Q8NE71	ATP-binding cassette sub-family F member 1 OS=Homo sapiens OX=9606 GN=ABCF1 PE=1 SV=2 - [ABCF1_HUMAN]	6.56244e+06	4.96607e+07	4.09824e+07	7.20552e+07	7.10534e+07	4.48405e+07	1.93352	0.129746
P52907	F-actin-capping protein subunit alpha-1 OS=Homo sapiens OX=9606 GN=CAPZA1 PE=1 SV=3 - [CAZA1_HUMAN]	7.55814e+06	5.82812e+06	2.27033e+07	1.22457e+08	8.00446e+07	7.78773e+07	7.76897	0.00623928
Q9GZR7	ATP-dependent RNA helicase DDX24 OS=Homo sapiens OX=9606 GN=DDX24 PE=1 SV=1 - [DDX24_HUMAN]	8.19152e+06	4.29194e+06	5.10649e+06	7.05039e+07	5.17193e+07	8.54471e+06	7.43424	0.109381
P02746	Complement C1q subcomponent subunit B OS=Homo sapiens OX=9606 GN=C1QB PE=1 SV=3 - [C1QB_HUMAN]	5.86785e+06	7.45615e+06	6.63582e+08	9.80917e+06	5.97456e+06	5.37972e+06	0.031265	0.374681
Q8WU68	Splicing factor U2AF 26 kDa subunit OS=Homo sapiens OX=9606 GN=U2AF1L4 PE=1 SV=2 - [U2AF4_HUMAN]	1.20958e+07	1.56624e+07	5.83055e+06	7.63184e+06	7.68972e+06	9.10546e+06	0.727239	0.353743
O00750	Phosphatidylinositol 4-phosphate 3-kinase C2 domain-containing subunit beta OS=Homo sapiens OX=9606 GN=PIK3C2B PE=1 SV=2 - [P3C2B_HUMAN]	5.70186e+06	5.47148e+06	6.48466e+06	1.35865e+08	1.24072e+08	1.1742e+08	21.3703	2.43907e-05
Q9UBX3	Mitochondrial dicarboxylate carrier OS=Homo sapiens OX=9606 GN=SLC25A10 PE=1 SV=2 - [DIC_HUMAN]	5.9956e+07	6.9765e+07	4.83898e+07	2.0375e+07	8.24548e+07	8.24948e+07	1.0405	0.916729
Q7RTS7	Keratin, type II cytoskeletal 74 OS=Homo sapiens OX=9606 GN=KRT74 PE=1 SV=2 - [K2C74_HUMAN]	3.4389e+09	5.01186e+09	6.19948e+09	1.19057e+09	9.7735e+08	8.80898e+08	0.208107	0.00861274
P26196	Probable ATP-dependent RNA helicase DDX6 OS=Homo sapiens OX=9606 GN=DDX6 PE=1 SV=2 - [DDX6_HUMAN]	1.20646e+08	3.18067e+06	4.05958e+06	1.57623e+08	3.50327e+07	8.07579e+07	2.13795	0.411229
Q6PL18	ATPase family AAA domain-containing protein 2 OS=Homo sapiens OX=9606 GN=ATAD2 PE=1 SV=1 - [ATAD2_HUMAN]	5.22971e+06	4.04722e+06	6.86249e+06	9.30885e+07	7.67626e+07	8.65242e+07	15.885	7.64239e-05
Q7L0Y3	tRNA methyltransferase 10 homolog C OS=Homo sapiens OX=9606 GN=TRMT10C PE=1 SV=2 - [TM10C_HUMAN]	8.64822e+07	8.81282e+07	7.96903e+07	4.6842e+07	9.79811e+07	3.59578e+07	0.710894	0.272881
P30049	ATP synthase subunit delta, mitochondrial OS=Homo sapiens OX=9606 GN=ATP5F1D PE=1 SV=2 - [ATPD_HUMAN]	6.38741e+06	6.96442e+07	4.83673e+06	4.64904e+06	6.81745e+06	1.42188e+07	0.317619	0.441337
Q13084	39S ribosomal protein L28, mitochondrial OS=Homo sapiens OX=9606 GN=MRPL28 PE=1 SV=4 - [RM28_HUMAN]	6.9461e+07	5.49532e+07	3.71871e+07	5.40214e+06	4.97788e+06	3.44906e+07	0.277662	0.0450018
Q5SY16	Polynucleotide 5'-hydroxyl-kinase NOL9 OS=Homo sapiens OX=9606 GN=NOL9 PE=1 SV=1 - [NOL9_HUMAN]	8.22908e+06	1.21378e+07	1.06364e+07	5.99269e+07	8.40125e+07	9.42507e+07	7.68276	0.00251665
O14929	Histone acetyltransferase type B catalytic subunit OS=Homo sapiens OX=9606 GN=HAT1 PE=1 SV=2 - [HAT1_HUMAN]	7.555e+06	5.54968e+07	4.20878e+07	1.057e+08	1.27613e+08	1.31246e+08	3.46738	0.00614434
O94901	SUN domain-containing protein 1 OS=Homo sapiens OX=9606 GN=SUN1 PE=1 SV=4 - [SUN1_HUMAN]	8.83256e+06	7.95152e+06	2.20081e+06	5.6506e+07	7.77748e+07	6.11818e+07	10.2957	0.00097103
Q99832	T-complex protein 1 subunit eta OS=Homo sapiens OX=9606 GN=CCT7 PE=1 SV=2 - [TCPH_HUMAN]	7.98356e+06	6.68641e+06	4.03741e+06	4.54255e+07	1.79864e+07	2.41999e+07	4.68328	0.0519929
P35250	Replication factor C subunit 2 OS=Homo sapiens OX=9606 GN=RFC2 PE=1 SV=3 - [RFC2_HUMAN]	5.78025e+06	8.58567e+06	3.23089e+06	5.36472e+07	3.27026e+07	5.18378e+07	7.85299	0.00427107
Q8IYD1	Eukaryotic peptide chain release factor GTP-binding subunit ERF3B OS=Homo sapiens OX=9606 GN=GSPT2 PE=1 SV=2 - [ERF3B_HUMAN]	6.7585e+07	1.18163e+08	9.27922e+07	1.27516e+08	1.26705e+08	1.01408e+08	1.27676	0.203675
P22102	Trifunctional purine biosynthetic protein adenosine-3 OS=Homo sapiens OX=9606 GN=GART PE=1 SV=1 - [PUR2_HUMAN]	3.78529e+07	3.08721e+07	2.74842e+07	7.25916e+07	1.24589e+08	1.05788e+08	3.14906	0.0112885
Q86Y46	Keratin, type II cytoskeletal 73 OS=Homo sapiens OX=9606 GN=KRT73 PE=1 SV=1 - [K2C73_HUMAN]	3.64482e+09	5.01186e+09	6.3804e+09	1.19057e+09	9.7735e+08	8.80898e+08	0.202753	0.00735067
O60762	Dolichol-phosphate mannosyltransferase subunit 1 OS=Homo sapiens OX=9606 GN=DPM1 PE=1 SV=1 - [DPM1_HUMAN]	1.12192e+08	6.17839e+06	5.68517e+07	7.09254e+07	5.90241e+07	7.13693e+07	1.14893	0.792145
Q9Y314	Nitric oxide synthase-interacting protein OS=Homo sapiens OX=9606 GN=NOSIP PE=1 SV=1 - [NOSIP_HUMAN]	7.16731e+06	3.67981e+06	6.0182e+06	4.56085e+07	9.00254e+06	4.35087e+07	5.81784	0.0853704
Q96BW9	Phosphatidate cytidylyltransferase, mitochondrial OS=Homo sapiens OX=9606 GN=TAMM41 PE=1 SV=2 - [TAM41_HUMAN]	1.603e+08	1.46935e+08	1.70418e+08	1.16213e+08	1.24528e+08	1.28929e+08	0.773932	0.00972578
O95573	Fatty acid CoA ligase Acsl3 OS=Homo sapiens OX=9606 GN=ACSL3 PE=1 SV=3 - [ACSL3_HUMAN]	1.39743e+08	8.32011e+07	1.70111e+08	1.04585e+08	9.3723e+07	9.05807e+07	0.734983	0.249828
Q8IZ07	Ankyrin repeat domain-containing protein 13A OS=Homo sapiens OX=9606 GN=ANKRD13A PE=1 SV=3 - [AN13A_HUMAN]	4.36848e+06	8.6706e+06	4.59235e+06	7.87786e+07	6.29106e+07	5.20863e+07	10.9903	0.00173003
Q99873	Protein arginine N-methyltransferase 1 OS=Homo sapiens OX=9606 GN=PRMT1 PE=1 SV=3 - [ANM1_HUMAN]	1.81429e+07	2.04561e+06	3.81433e+06	1.07332e+08	1.15932e+08	5.75535e+07	11.6993	0.0105758
P40939	Trifunctional enzyme subunit alpha, mitochondrial OS=Homo sapiens OX=9606 GN=HADHA PE=1 SV=2 - [ECHA_HUMAN]	1.27799e+08	9.56724e+07	9.28501e+07	1.18122e+08	1.29144e+08	6.69091e+07	0.993213	0.975838
Q3YEC7	Rab-like protein 6 OS=Homo sapiens OX=9606 GN=RABL6 PE=1 SV=2 - [RABL6_HUMAN]	3.1033e+07	6.83909e+07	3.33157e+07	2.68944e+07	4.39269e+07	1.60392e+07	0.654367	0.352874
P22392	Nucleoside diphosphate kinase B OS=Homo sapiens OX=9606 GN=NME2 PE=1 SV=1 - [NDKB_HUMAN]	1.47101e+07	7.63487e+07	3.96173e+06	5.5728e+07	1.30367e+08	9.33923e+07	2.94133	0.119978
Q9Y6N5	Sulfide:quinone oxidoreductase, mitochondrial OS=Homo sapiens OX=9606 GN=SQOR PE=1 SV=1 - [SQOR_HUMAN]	1.00652e+08	5.05042e+07	5.4498e+07	8.70777e+07	1.59538e+07	1.11835e+08	1.0448	0.930197
Q12769	Nuclear pore complex protein Nup160 OS=Homo sapiens OX=9606 GN=NUP160 PE=1 SV=3 - [NU160_HUMAN]	8.08547e+06	6.79103e+06	4.82936e+06	1.36848e+08	1.83474e+08	1.77839e+08	25.2799	0.000412142
P62273	40S ribosomal protein S29 OS=Homo sapiens OX=9606 GN=RPS29 PE=1 SV=2 - [RS29_HUMAN]	6.99164e+06	9.94059e+06	4.46275e+06	1.34852e+08	6.61496e+06	7.36421e+06	6.95635	0.375636
P01040	Cystatin-A OS=Homo sapiens OX=9606 GN=CSTA PE=1 SV=1 - [CYTA_HUMAN]	4.57234e+06	2.87733e+06	3.4326e+07	9.59931e+06	6.37945e+06	1.24764e+07	0.681142	0.690373
Q8IVT2	Mitotic interactor and substrate of PLK1 OS=Homo sapiens OX=9606 GN=MISP PE=1 SV=1 - [MISP_HUMAN]	7.6007e+06	4.71688e+06	3.33349e+06	4.00889e+07	2.9594e+07	4.35751e+07	7.23644	0.00176192
P51858	Hepatoma-derived growth factor OS=Homo sapiens OX=9606 GN=HDGF PE=1 SV=1 - [HDGF_HUMAN]	1.2571e+07	4.51596e+06	9.66006e+06	8.47377e+07	1.06253e+07	3.42073e+07	4.84428	0.194042
Q9GZP7	Vomeronasal type-1 receptor 1 OS=Homo sapiens OX=9606 GN=VN1R1 PE=2 SV=1 - [VN1R1_HUMAN]	5.65619e+06	5.03933e+06	8.35379e+06	7.13015e+06	5.54901e+06	6.99067e+06	1.03257	0.864412
Q15393	Splicing factor 3B subunit 3 OS=Homo sapiens OX=9606 GN=SF3B3 PE=1 SV=4 - [SF3B3_HUMAN]	2.12934e+07	2.23504e+07	2.41781e+07	1.85713e+08	2.07265e+08	1.83449e+08	8.49911	2.43652e-05
Q9Y3C1	Nucleolar protein 16 OS=Homo sapiens OX=9606 GN=NOP16 PE=1 SV=2 - [NOP16_HUMAN]	7.93061e+06	8.51869e+06	6.20414e+06	9.20573e+06	9.07018e+06	3.08443e+07	2.16833	0.291619
Q9Y3A4	Ribosomal RNA-processing protein 7 homolog A OS=Homo sapiens OX=9606 GN=RRP7A PE=1 SV=2 - [RRP7A_HUMAN]	1.00968e+07	4.72964e+06	2.36592e+07	1.01078e+08	1.26846e+08	7.56428e+07	7.88778	0.00503731
O76031	ATP-dependent Clp protease ATP-binding subunit clpX-like, mitochondrial OS=Homo sapiens OX=9606 GN=CLPX PE=1 SV=2 - [CLPX_HUMAN]	5.01241e+07	3.26459e+07	4.33191e+07	5.53853e+07	5.84703e+07	3.49987e+07	1.18055	0.444253
P52209	6-phosphogluconate dehydrogenase, decarboxylating OS=Homo sapiens OX=9606 GN=PGD PE=1 SV=3 - [6PGD_HUMAN]	5.86622e+06	3.53089e+06	6.2287e+06	8.50748e+06	6.85142e+07	4.06514e+07	7.53068	0.121598
P62244	40S ribosomal protein S15a OS=Homo sapiens OX=9606 GN=RPS15A PE=1 SV=2 - [RS15A_HUMAN]	1.05731e+07	6.2877e+06	6.78163e+06	3.76573e+06	7.80503e+07	5.90048e+06	3.71012	0.431694
P56134	ATP synthase subunit f, mitochondrial OS=Homo sapiens OX=9606 GN=ATP5MF PE=1 SV=3 - [ATPK_HUMAN]	2.28723e+07	2.41229e+07	5.70304e+06	4.19459e+06	3.06992e+07	1.12553e+07	0.875724	0.836357
Q07020	60S ribosomal protein L18 OS=Homo sapiens OX=9606 GN=RPL18 PE=1 SV=2 - [RL18_HUMAN]	3.99344e+06	3.74387e+06	2.364e+06	2.2171e+08	2.16366e+08	2.14515e+08	64.6046	6.87212e-08
Q587J8	KH domain-containing protein 3 OS=Homo sapiens OX=9606 GN=KHDC3L PE=1 SV=1 - [KHDC3_HUMAN]	1.35727e+07	1.12889e+07	7.55919e+06	1.23328e+07	6.8544e+06	4.15035e+06	0.719835	0.366703
Q53GS9	U4/U6.U5 tri-snRNP-associated protein 2 OS=Homo sapiens OX=9606 GN=USP39 PE=1 SV=2 - [SNUT2_HUMAN]	1.43914e+07	7.99463e+06	6.00736e+06	6.84478e+07	5.9579e+07	5.13799e+07	6.31861	0.000813185
Q9UKD2	mRNA turnover protein 4 homolog OS=Homo sapiens OX=9606 GN=MRTO4 PE=1 SV=2 - [MRT4_HUMAN]	4.71622e+06	3.14428e+06	9.99587e+06	2.44478e+07	5.26536e+06	5.01911e+06	1.94509	0.452182
O75400	Pre-mRNA-processing factor 40 homolog A OS=Homo sapiens OX=9606 GN=PRPF40A PE=1 SV=2 - [PR40A_HUMAN]	1.19688e+08	7.98174e+07	1.15051e+08	1.08657e+08	1.40491e+08	8.90863e+07	1.07527	0.707313
Q7Z7H8	39S ribosomal protein L10, mitochondrial OS=Homo sapiens OX=9606 GN=MRPL10 PE=1 SV=3 - [RM10_HUMAN]	3.65642e+06	6.79245e+06	5.06093e+07	4.89813e+06	4.90527e+06	8.4493e+06	0.298939	0.401064
P28370	Probable global transcription activator SNF2L1 OS=Homo sapiens OX=9606 GN=SMARCA1 PE=1 SV=2 - [SMCA1_HUMAN]	2.60906e+06	4.1314e+06	4.20391e+06	1.96044e+08	2.16381e+08	1.46061e+08	51.0295	0.000947115
Q8NC51	Plasminogen activator inhibitor 1 RNA-binding protein OS=Homo sapiens OX=9606 GN=SERBP1 PE=1 SV=2 - [PAIRB_HUMAN]	5.97527e+07	5.34394e+07	1.78164e+07	8.78415e+07	4.72464e+07	9.01485e+07	1.71925	0.175291
Q6DKI1	60S ribosomal protein L7-like 1 OS=Homo sapiens OX=9606 GN=RPL7L1 PE=1 SV=2 - [RL7L_HUMAN]	7.104e+06	4.52724e+06	5.55633e+06	1.05196e+08	1.2458e+08	1.23275e+08	20.541	5.89145e-05
Q7Z794	Keratin, type II cytoskeletal 1b OS=Homo sapiens OX=9606 GN=KRT77 PE=1 SV=3 - [K2C1B_HUMAN]	1.76249e+10	1.62037e+10	1.88782e+10	8.46698e+09	7.74222e+09	7.38576e+09	0.447665	0.000314036
Q14694	Ubiquitin carboxyl-terminal hydrolase 10 OS=Homo sapiens OX=9606 GN=USP10 PE=1 SV=2 - [UBP10_HUMAN]	2.24094e+07	4.8883e+06	6.31872e+06	5.20682e+07	4.06119e+07	6.13049e+07	4.58065	0.00811247
P41252	Isoleucine--tRNA ligase, cytoplasmic OS=Homo sapiens OX=9606 GN=IARS1 PE=1 SV=2 - [SYIC_HUMAN]	6.44198e+07	4.18087e+07	5.43886e+07	6.69741e+07	8.1942e+07	6.34449e+07	1.32216	0.117112
O43790	Keratin, type II cuticular Hb6 OS=Homo sapiens OX=9606 GN=KRT86 PE=1 SV=1 - [KRT86_HUMAN]	6.36695e+07	5.99601e+07	7.75434e+07	4.91597e+08	9.75696e+06	2.11576e+08	3.54386	0.289422
Q9H583	HEAT repeat-containing protein 1 OS=Homo sapiens OX=9606 GN=HEATR1 PE=1 SV=3 - [HEAT1_HUMAN]	1.10313e+07	7.0917e+06	4.30595e+06	1.15867e+08	1.52148e+08	3.53026e+08	27.6893	0.0538419
Q99567	Nuclear pore complex protein Nup88 OS=Homo sapiens OX=9606 GN=NUP88 PE=1 SV=2 - [NUP88_HUMAN]	8.68503e+06	8.9938e+06	5.22319e+06	5.66118e+07	6.71507e+07	4.63382e+07	7.42732	0.00132005
P40938	Replication factor C subunit 3 OS=Homo sapiens OX=9606 GN=RFC3 PE=1 SV=2 - [RFC3_HUMAN]	3.54455e+07	2.55869e+07	4.08434e+07	2.67382e+07	6.87711e+07	3.74795e+07	1.3054	0.481414
P98170	E3 ubiquitin-protein ligase XIAP OS=Homo sapiens OX=9606 GN=XIAP PE=1 SV=2 - [XIAP_HUMAN]	1.03426e+07	1.67819e+07	7.36064e+06	6.23117e+07	4.95884e+07	6.77022e+07	5.20811	0.00132417
Q8NFJ5	Retinoic acid-induced protein 3 OS=Homo sapiens OX=9606 GN=GPRC5A PE=1 SV=2 - [RAI3_HUMAN]	1.25859e+07	5.36855e+06	2.05058e+06	2.04681e+08	1.76795e+08	1.84341e+08	28.2838	3.36565e-05
Q8TF42	Ubiquitin-associated and SH3 domain-containing protein B OS=Homo sapiens OX=9606 GN=UBASH3B PE=1 SV=2 - [UBS3B_HUMAN]	5.56249e+06	4.0447e+06	4.83405e+06	5.33913e+07	4.27612e+07	4.09653e+07	9.49488	0.000468701
Q96EE3	Nucleoporin SEH1 OS=Homo sapiens OX=9606 GN=SEH1L PE=1 SV=3 - [SEH1_HUMAN]	1.7231e+07	3.41606e+06	6.58568e+06	4.52558e+07	8.1551e+07	6.92255e+07	7.19842	0.00795214
P42330	Aldo-keto reductase family 1 member C3 OS=Homo sapiens OX=9606 GN=AKR1C3 PE=1 SV=4 - [AK1C3_HUMAN]	4.24785e+06	1.07074e+07	4.22846e+06	4.90517e+07	4.31573e+07	2.72226e+07	6.22569	0.00824367
P36873	Serine/threonine-protein phosphatase PP1-gamma catalytic subunit OS=Homo sapiens OX=9606 GN=PPP1CC PE=1 SV=1 - [PP1G_HUMAN]	2.448e+07	4.58113e+07	3.47408e+06	6.61437e+07	4.68031e+07	9.58782e+07	2.83094	0.0746859
Q6UB35	Monofunctional C1-tetrahydrofolate synthase, mitochondrial OS=Homo sapiens OX=9606 GN=MTHFD1L PE=1 SV=1 - [C1TM_HUMAN]	9.24986e+06	1.82602e+07	1.02116e+07	8.58967e+07	7.98229e+07	5.40728e+07	5.8267	0.00395217
Q02750	Dual specificity mitogen-activated protein kinase kinase 1 OS=Homo sapiens OX=9606 GN=MAP2K1 PE=1 SV=2 - [MP2K1_HUMAN]	7.75879e+06	2.0567e+06	7.35299e+06	6.90961e+07	1.14132e+07	6.11776e+07	8.25273	0.0841073
P16615	Sarcoplasmic/endoplasmic reticulum calcium ATPase 2 OS=Homo sapiens OX=9606 GN=ATP2A2 PE=1 SV=1 - [AT2A2_HUMAN]	4.33912e+07	9.13626e+07	5.26489e+07	5.03609e+07	4.10791e+07	5.4381e+07	0.778116	0.413737
O75955	Flotillin-1 OS=Homo sapiens OX=9606 GN=FLOT1 PE=1 SV=3 - [FLOT1_HUMAN]	9.41089e+06	6.52615e+06	2.07101e+06	7.49123e+07	4.76542e+07	3.98368e+07	9.01838	0.0113446
P39019	40S ribosomal protein S19 OS=Homo sapiens OX=9606 GN=RPS19 PE=1 SV=2 - [RS19_HUMAN]	8.90016e+06	2.85127e+07	3.44841e+06	5.47034e+06	1.46815e+07	1.72585e+07	0.915546	0.897812
P0CW18	Serine protease 56 OS=Homo sapiens OX=9606 GN=PRSS56 PE=1 SV=1 - [PRS56_HUMAN]	7.33808e+07	5.71678e+07	4.95403e+07	6.28409e+07	4.71254e+07	5.14084e+07	0.896083	0.501367
P29372	DNA-3-methyladenine glycosylase OS=Homo sapiens OX=9606 GN=MPG PE=1 SV=3 - [3MG_HUMAN]	1.06229e+08	8.6951e+07	1.16149e+08	1.37552e+08	9.48405e+07	1.12926e+08	1.11635	0.470193
Q5JVF3	PCI domain-containing protein 2 OS=Homo sapiens OX=9606 GN=PCID2 PE=1 SV=2 - [PCID2_HUMAN]	4.93186e+06	6.25683e+06	5.08001e+06	9.8221e+06	7.61267e+07	3.23105e+07	7.26913	0.155758
P13797	Plastin-3 OS=Homo sapiens OX=9606 GN=PLS3 PE=1 SV=4 - [PLST_HUMAN]	4.08887e+07	5.50496e+06	5.88892e+07	9.26572e+07	9.23879e+07	9.04928e+07	2.61712	0.0224407
Q9NXF1	Testis-expressed protein 10 OS=Homo sapiens OX=9606 GN=TEX10 PE=1 SV=2 - [TEX10_HUMAN]	7.63804e+07	3.61452e+07	4.52778e+07	1.37991e+08	1.72342e+08	1.4189e+08	2.86574	0.00384779
Q53EL6	Programmed cell death protein 4 OS=Homo sapiens OX=9606 GN=PDCD4 PE=1 SV=2 - [PDCD4_HUMAN]	4.59235e+06	1.78105e+06	2.66222e+06	1.7863e+08	1.93117e+08	1.68025e+08	59.7382	1.73825e-05
Q96FV9	THO complex subunit 1 OS=Homo sapiens OX=9606 GN=THOC1 PE=1 SV=1 - [THOC1_HUMAN]	6.75629e+06	7.82848e+06	4.77279e+06	5.20141e+07	7.03721e+07	6.13347e+07	9.49092	0.000521781
P43686	26S proteasome regulatory subunit 6B OS=Homo sapiens OX=9606 GN=PSMC4 PE=1 SV=2 - [PRS6B_HUMAN]	7.06031e+06	3.9213e+06	9.85278e+06	2.75835e+07	6.11703e+06	2.96659e+07	3.04143	0.140142
Q9UJZ1	Stomatin-like protein 2, mitochondrial OS=Homo sapiens OX=9606 GN=STOML2 PE=1 SV=1 - [STML2_HUMAN]	6.61129e+06	7.90591e+06	2.11492e+07	1.09695e+07	1.4706e+07	1.08546e+07	1.02422	0.955184
P21266	Glutathione S-transferase Mu 3 OS=Homo sapiens OX=9606 GN=GSTM3 PE=1 SV=3 - [GSTM3_HUMAN]	1.55197e+07	7.87092e+06	2.25574e+07	1.0529e+08	1.13428e+08	1.20278e+08	7.37782	8.67616e-05
Q12788	Transducin beta-like protein 3 OS=Homo sapiens OX=9606 GN=TBL3 PE=1 SV=2 - [TBL3_HUMAN]	1.85884e+07	5.3678e+06	6.037e+06	9.21768e+07	7.52663e+07	7.33402e+07	8.02792	0.000675348
Q86UV5	Ubiquitin carboxyl-terminal hydrolase 48 OS=Homo sapiens OX=9606 GN=USP48 PE=1 SV=1 - [UBP48_HUMAN]	3.00425e+07	5.05542e+06	3.92592e+06	1.22398e+08	1.55011e+08	1.18335e+08	10.1411	0.00117379
Q9UKV3	Apoptotic chromatin condensation inducer in the nucleus OS=Homo sapiens OX=9606 GN=ACIN1 PE=1 SV=2 - [ACINU_HUMAN]	6.92508e+06	5.30897e+06	4.76221e+06	8.31089e+07	4.7969e+07	9.99567e+07	13.5933	0.00962775
P49792	E3 SUMO-protein ligase RanBP2 OS=Homo sapiens OX=9606 GN=RANBP2 PE=1 SV=2 - [RBP2_HUMAN]	9.76034e+06	3.01056e+06	7.70626e+06	2.94849e+08	2.92934e+08	2.62674e+08	41.532	1.28528e-05
P84103	Serine/arginine-rich splicing factor 3 OS=Homo sapiens OX=9606 GN=SRSF3 PE=1 SV=1 - [SRSF3_HUMAN]	8.41598e+06	1.55187e+07	1.20916e+07	2.14708e+08	2.57465e+08	2.18052e+08	19.159	9.59097e-05
P35237	Serpin B6 OS=Homo sapiens OX=9606 GN=SERPINB6 PE=1 SV=3 - [SPB6_HUMAN]	4.50992e+07	5.92618e+07	4.83228e+07	1.68585e+08	2.23144e+08	2.21219e+08	4.01449	0.00112619
Q86U42	Polyadenylate-binding protein 2 OS=Homo sapiens OX=9606 GN=PABPN1 PE=1 SV=3 - [PABP2_HUMAN]	1.13257e+07	6.27029e+06	6.67483e+06	1.11117e+08	8.92037e+07	1.05576e+08	12.6034	0.000157297
Q9BUQ8	Probable ATP-dependent RNA helicase DDX23 OS=Homo sapiens OX=9606 GN=DDX23 PE=1 SV=3 - [DDX23_HUMAN]	8.85139e+07	6.08604e+07	3.84699e+06	9.00486e+07	7.95578e+07	1.79686e+08	2.27966	0.180882
Q92522	Histone H1.10 OS=Homo sapiens OX=9606 GN=H1-10 PE=1 SV=1 - [H1X_HUMAN]	1.26339e+07	3.68185e+06	4.7074e+06	4.38569e+07	1.36677e+08	7.56586e+07	12.1862	0.0457908
P55072	Transitional endoplasmic reticulum ATPase OS=Homo sapiens OX=9606 GN=VCP PE=1 SV=4 - [TERA_HUMAN]	4.15257e+07	3.17605e+06	8.64359e+06	5.45056e+07	5.5144e+07	5.84824e+07	3.15177	0.0335994
Q9Y324	rRNA-processing protein FCF1 homolog OS=Homo sapiens OX=9606 GN=FCF1 PE=1 SV=1 - [FCF1_HUMAN]	2.9074e+06	1.79767e+06	3.79508e+06	8.90757e+06	1.33272e+08	1.07876e+08	29.4178	0.101095
Q9NR56	Muscleblind-like protein 1 OS=Homo sapiens OX=9606 GN=MBNL1 PE=1 SV=2 - [MBNL1_HUMAN]	5.41328e+07	2.97441e+07	2.88346e+07	1.13006e+07	9.7082e+07	8.62684e+06	1.03813	0.964448
P49736	DNA replication licensing factor MCM2 OS=Homo sapiens OX=9606 GN=MCM2 PE=1 SV=4 - [MCM2_HUMAN]	6.43216e+07	1.96705e+06	3.79396e+07	8.69812e+07	1.8046e+08	6.20445e+07	3.16119	0.136035
P49005	DNA polymerase delta subunit 2 OS=Homo sapiens OX=9606 GN=POLD2 PE=1 SV=1 - [DPOD2_HUMAN]	1.73172e+07	1.58009e+07	6.00403e+06	7.37326e+07	1.05167e+08	7.86328e+06	4.77384	0.163661
Q14166	Tubulin--tyrosine ligase-like protein 12 OS=Homo sapiens OX=9606 GN=TTLL12 PE=1 SV=2 - [TTL12_HUMAN]	8.18244e+06	2.99994e+06	7.56863e+06	6.82961e+07	6.71461e+07	5.12234e+07	9.95497	0.000622346
P48594	Serpin B4 OS=Homo sapiens OX=9606 GN=SERPINB4 PE=1 SV=2 - [SPB4_HUMAN]	1.13122e+08	3.22725e+07	4.15314e+07	6.46088e+06	9.43375e+06	4.6352e+06	0.109829	0.0960379
P04181	Ornithine aminotransferase, mitochondrial OS=Homo sapiens OX=9606 GN=OAT PE=1 SV=1 - [OAT_HUMAN]	2.39463e+07	6.23852e+07	2.84751e+07	3.59129e+07	1.99571e+07	2.26216e+07	0.683686	0.407575
P19525	Interferon-induced, double-stranded RNA-activated protein kinase OS=Homo sapiens OX=9606 GN=EIF2AK2 PE=1 SV=2 - [E2AK2_HUMAN]	8.46102e+06	7.45409e+06	8.67841e+06	4.76905e+07	5.04867e+07	3.78686e+07	5.53178	0.00064168
P41223	Protein BUD31 homolog OS=Homo sapiens OX=9606 GN=BUD31 PE=1 SV=2 - [BUD31_HUMAN]	1.00068e+08	6.39748e+07	1.66475e+07	4.80456e+07	5.4532e+07	5.79859e+07	0.888614	0.796399
P21912	Succinate dehydrogenase [ubiquinone] iron-sulfur subunit, mitochondrial OS=Homo sapiens OX=9606 GN=SDHB PE=1 SV=3 - [SDHB_HUMAN]	1.48398e+08	1.04288e+08	8.46848e+07	9.96938e+07	8.99675e+07	2.76179e+07	0.644036	0.245074
O00410	Importin-5 OS=Homo sapiens OX=9606 GN=IPO5 PE=1 SV=4 - [IPO5_HUMAN]	1.23303e+07	3.843e+06	6.29816e+06	1.94379e+08	2.10464e+08	1.73577e+08	25.7403	7.2015e-05
Q86VN1	Vacuolar protein-sorting-associated protein 36 OS=Homo sapiens OX=9606 GN=VPS36 PE=1 SV=1 - [VPS36_HUMAN]	6.00112e+06	6.44746e+06	3.65515e+06	5.37142e+07	7.30408e+07	7.19205e+07	12.3372	0.000651753
Q14254	Flotillin-2 OS=Homo sapiens OX=9606 GN=FLOT2 PE=1 SV=2 - [FLOT2_HUMAN]	4.40222e+06	4.38061e+06	3.60108e+06	8.61233e+07	1.02568e+08	6.91536e+07	20.8209	0.00106059
Q96L92	Sorting nexin-27 OS=Homo sapiens OX=9606 GN=SNX27 PE=1 SV=2 - [SNX27_HUMAN]	7.12125e+06	1.04522e+07	5.22174e+06	9.32952e+07	6.79561e+07	8.8932e+07	10.9753	0.000682159
Q96EU6	Ribosomal RNA processing protein 36 homolog OS=Homo sapiens OX=9606 GN=RRP36 PE=1 SV=1 - [RRP36_HUMAN]	7.44273e+06	4.9147e+07	6.98777e+06	8.76365e+06	9.07647e+06	9.61063e+06	0.431768	0.437599
P49790	Nuclear pore complex protein Nup153 OS=Homo sapiens OX=9606 GN=NUP153 PE=1 SV=2 - [NU153_HUMAN]	4.29275e+07	1.59196e+07	2.71171e+07	1.29637e+08	1.19854e+08	1.67804e+08	4.85428	0.00264664
Q92499	ATP-dependent RNA helicase DDX1 OS=Homo sapiens OX=9606 GN=DDX1 PE=1 SV=2 - [DDX1_HUMAN]	4.42968e+07	3.3823e+07	3.08144e+07	9.93144e+07	8.55225e+07	4.45123e+07	2.10539	0.0770696
P52294	Importin subunit alpha-5 OS=Homo sapiens OX=9606 GN=KPNA1 PE=1 SV=3 - [IMA5_HUMAN]	9.55815e+06	5.05472e+06	6.5679e+06	8.18001e+07	6.87902e+07	7.70398e+07	10.747	6.85865e-05
Q86UY6	N-alpha-acetyltransferase 40 OS=Homo sapiens OX=9606 GN=NAA40 PE=1 SV=1 - [NAA40_HUMAN]	5.04552e+07	8.15357e+06	2.82608e+07	6.08477e+07	8.5138e+07	8.6004e+07	2.67055	0.0304392
Q12931	Heat shock protein 75 kDa, mitochondrial OS=Homo sapiens OX=9606 GN=TRAP1 PE=1 SV=3 - [TRAP1_HUMAN]	1.17515e+09	1.12955e+09	4.65774e+06	7.33387e+08	8.13124e+08	5.69729e+08	0.916376	0.876728
O43837	Isocitrate dehydrogenase [NAD] subunit beta, mitochondrial OS=Homo sapiens OX=9606 GN=IDH3B PE=1 SV=2 - [IDH3B_HUMAN]	2.62789e+07	3.90367e+06	1.68285e+07	3.27502e+07	1.04979e+07	1.04081e+07	1.14135	0.833325
P07237	Protein disulfide-isomerase OS=Homo sapiens OX=9606 GN=P4HB PE=1 SV=3 - [PDIA1_HUMAN]	4.36606e+06	2.15741e+07	3.38893e+06	4.66185e+07	5.50294e+07	6.36431e+07	5.63573	0.00413214
O43913	Origin recognition complex subunit 5 OS=Homo sapiens OX=9606 GN=ORC5 PE=1 SV=1 - [ORC5_HUMAN]	5.53201e+07	3.34987e+07	1.00327e+07	4.52401e+07	3.68025e+07	4.57098e+07	1.29237	0.511725
P31942	Heterogeneous nuclear ribonucleoprotein H3 OS=Homo sapiens OX=9606 GN=HNRNPH3 PE=1 SV=2 - [HNRH3_HUMAN]	6.95491e+06	6.25683e+06	4.14201e+06	9.9535e+07	1.19704e+08	1.44511e+08	20.9609	0.000896617
Q13813	Spectrin alpha chain, non-erythrocytic 1 OS=Homo sapiens OX=9606 GN=SPTAN1 PE=1 SV=3 - [SPTN1_HUMAN]	1.22324e+07	7.94216e+06	4.2558e+06	1.08762e+08	1.23283e+08	8.99301e+07	13.1793	0.000563783
Q8WTT2	Nucleolar complex protein 3 homolog OS=Homo sapiens OX=9606 GN=NOC3L PE=1 SV=1 - [NOC3L_HUMAN]	9.64199e+06	1.19864e+07	2.1654e+06	1.29027e+08	1.33402e+08	1.54325e+08	17.5152	9.64194e-05
Q9BRF8	Serine/threonine-protein phosphatase CPPED1 OS=Homo sapiens OX=9606 GN=CPPED1 PE=1 SV=3 - [CPPED_HUMAN]	5.62063e+06	1.33256e+07	8.12198e+06	2.20886e+07	6.2093e+06	2.5665e+07	1.99359	0.233597
P61106	Ras-related protein Rab-14 OS=Homo sapiens OX=9606 GN=RAB14 PE=1 SV=4 - [RAB14_HUMAN]	3.43498e+07	8.65079e+06	4.50189e+06	6.91501e+06	9.24345e+06	1.1587e+07	0.584083	0.523492
O60716	Catenin delta-1 OS=Homo sapiens OX=9606 GN=CTNND1 PE=1 SV=1 - [CTND1_HUMAN]	8.80549e+07	5.42568e+07	5.8714e+07	1.48378e+08	1.64248e+08	1.36715e+08	2.23524	0.00336475
Q96AQ6	Pre-B-cell leukemia transcription factor-interacting protein 1 OS=Homo sapiens OX=9606 GN=PBXIP1 PE=1 SV=1 - [PBIP1_HUMAN]	1.12871e+08	7.19305e+07	5.65177e+07	6.36563e+07	7.89973e+07	3.43737e+07	0.733581	0.371461
Q9BRR8	G patch domain-containing protein 1 OS=Homo sapiens OX=9606 GN=GPATCH1 PE=1 SV=1 - [GPTC1_HUMAN]	4.97192e+07	1.0918e+07	5.59847e+06	2.88827e+07	1.78568e+08	7.95799e+07	4.33348	0.18562
Q6FIF0	AN1-type zinc finger protein 6 OS=Homo sapiens OX=9606 GN=ZFAND6 PE=1 SV=2 - [ZFAN6_HUMAN]	5.91071e+06	8.05526e+06	8.51751e+06	1.04115e+08	5.38233e+06	1.20087e+08	10.2112	0.12668
Q9Y2R4	Probable ATP-dependent RNA helicase DDX52 OS=Homo sapiens OX=9606 GN=DDX52 PE=1 SV=4 - [DDX52_HUMAN]	7.54506e+06	1.93728e+06	7.84368e+06	4.9916e+07	7.00121e+07	4.58717e+07	9.56941	0.00302418
Q92598	Heat shock protein 105 kDa OS=Homo sapiens OX=9606 GN=HSPH1 PE=1 SV=1 - [HS105_HUMAN]	7.24172e+06	3.35917e+07	2.2323e+06	1.53493e+08	5.89546e+07	5.10285e+07	6.11801	0.0990094
Q9UGU5	HMG domain-containing protein 4 OS=Homo sapiens OX=9606 GN=HMGXB4 PE=1 SV=2 - [HMGX4_HUMAN]	7.55171e+07	8.77259e+07	6.79844e+07	5.10179e+07	8.94824e+07	7.56428e+07	0.934764	0.710962
O94906	Pre-mRNA-processing factor 6 OS=Homo sapiens OX=9606 GN=PRPF6 PE=1 SV=1 - [PRP6_HUMAN]	8.64539e+06	4.18704e+06	6.84491e+06	1.08161e+08	1.17469e+08	8.20159e+07	15.6345	0.000851547
Q9UIG0	Tyrosine-protein kinase BAZ1B OS=Homo sapiens OX=9606 GN=BAZ1B PE=1 SV=2 - [BAZ1B_HUMAN]	6.43006e+06	5.36855e+06	4.24226e+06	1.32682e+08	2.16231e+08	1.3595e+08	30.2268	0.00462745
Q02413	Desmoglein-1 OS=Homo sapiens OX=9606 GN=DSG1 PE=1 SV=2 - [DSG1_HUMAN]	2.2747e+08	9.50511e+07	9.29531e+07	4.20645e+07	1.49123e+07	8.91172e+07	0.351632	0.143831
Q8TAE8	Growth arrest and DNA damage-inducible proteins-interacting protein 1 OS=Homo sapiens OX=9606 GN=GADD45GIP1 PE=1 SV=1 - [G45IP_HUMAN]	2.65646e+07	9.98202e+06	7.42315e+06	5.94193e+06	6.07183e+06	1.33663e+07	0.577217	0.39322
P78527	DNA-dependent protein kinase catalytic subunit OS=Homo sapiens OX=9606 GN=PRKDC PE=1 SV=3 - [PRKDC_HUMAN]	7.67519e+07	3.77428e+07	4.5656e+07	1.7622e+08	1.90921e+08	2.02536e+08	3.55712	0.000642564
Q86Y79	Probable peptidyl-tRNA hydrolase OS=Homo sapiens OX=9606 GN=PTRH1 PE=1 SV=1 - [PTH_HUMAN]	4.91343e+06	4.17132e+07	6.84823e+06	7.56863e+06	9.11809e+06	3.45511e+06	0.37666	0.409591
O14979	Heterogeneous nuclear ribonucleoprotein D-like OS=Homo sapiens OX=9606 GN=HNRNPDL PE=1 SV=3 - [HNRDL_HUMAN]	1.63184e+07	2.78279e+06	7.82414e+06	2.51329e+08	1.99997e+08	1.83029e+08	23.5597	0.000636251
P07339	Cathepsin D OS=Homo sapiens OX=9606 GN=CTSD PE=1 SV=1 - [CATD_HUMAN]	8.38903e+07	7.3775e+06	5.38372e+07	2.18359e+07	1.37278e+07	1.04652e+07	0.317212	0.216257
P62714	Serine/threonine-protein phosphatase 2A catalytic subunit beta isoform OS=Homo sapiens OX=9606 GN=PPP2CB PE=1 SV=1 - [PP2AB_HUMAN]	2.8572e+07	3.50109e+07	1.16377e+07	1.49465e+07	4.61651e+07	3.14204e+07	1.23014	0.63926
P01861	Immunoglobulin heavy constant gamma 4 OS=Homo sapiens OX=9606 GN=IGHG4 PE=1 SV=1 - [IGHG4_HUMAN]	2.20733e+07	4.56148e+07	4.03007e+07	6.90352e+06	6.1647e+06	1.95505e+07	0.302056	0.039567
Q96T88	E3 ubiquitin-protein ligase UHRF1 OS=Homo sapiens OX=9606 GN=UHRF1 PE=1 SV=1 - [UHRF1_HUMAN]	1.04812e+07	1.2861e+07	7.27896e+06	6.25671e+07	4.43368e+07	5.25322e+07	5.20673	0.00146674
Q13200	26S proteasome non-ATPase regulatory subunit 2 OS=Homo sapiens OX=9606 GN=PSMD2 PE=1 SV=3 - [PSMD2_HUMAN]	3.14625e+06	5.68646e+06	1.19251e+07	1.06827e+08	9.66858e+07	9.04113e+07	14.1597	7.50549e-05
Q8NI27	THO complex subunit 2 OS=Homo sapiens OX=9606 GN=THOC2 PE=1 SV=2 - [THOC2_HUMAN]	1.0697e+07	5.20801e+06	1.18149e+07	1.15331e+08	1.28759e+08	1.26881e+08	13.3829	1.64461e-05
Q14126	Desmoglein-2 OS=Homo sapiens OX=9606 GN=DSG2 PE=1 SV=2 - [DSG2_HUMAN]	6.94142e+06	2.79768e+06	4.7123e+06	6.03646e+07	5.96327e+07	5.28793e+07	11.9626	3.83466e-05
P07737	Profilin-1 OS=Homo sapiens OX=9606 GN=PFN1 PE=1 SV=2 - [PROF1_HUMAN]	4.23051e+06	6.42427e+06	7.97637e+06	2.635e+07	7.49279e+07	3.15164e+07	7.12755	0.0693694
Q9NWB6	Arginine and glutamate-rich protein 1 OS=Homo sapiens OX=9606 GN=ARGLU1 PE=1 SV=1 - [ARGL1_HUMAN]	2.11122e+08	1.42087e+08	2.08634e+08	1.04353e+08	1.27799e+08	1.19538e+08	0.625959	0.0413592
P52292	Importin subunit alpha-1 OS=Homo sapiens OX=9606 GN=KPNA2 PE=1 SV=1 - [IMA1_HUMAN]	5.52445e+06	3.73913e+07	4.68819e+06	7.79746e+07	1.865e+08	1.27357e+08	8.23106	0.0258268
Q96GQ7	Probable ATP-dependent RNA helicase DDX27 OS=Homo sapiens OX=9606 GN=DDX27 PE=1 SV=2 - [DDX27_HUMAN]	6.54699e+06	6.15915e+06	7.18073e+06	1.0877e+08	1.00868e+08	7.71253e+07	14.4197	0.000728371
Q13242	Serine/arginine-rich splicing factor 9 OS=Homo sapiens OX=9606 GN=SRSF9 PE=1 SV=1 - [SRSF9_HUMAN]	9.07395e+06	4.93254e+06	4.80465e+06	1.13414e+07	6.68919e+06	5.99405e+06	1.27715	0.471369
Q09028	Histone-binding protein RBBP4 OS=Homo sapiens OX=9606 GN=RBBP4 PE=1 SV=3 - [RBBP4_HUMAN]	7.99946e+07	1.1104e+08	5.86855e+07	2.15349e+08	2.33201e+08	2.11913e+08	2.64482	0.00117069
Q6KB66	Keratin, type II cytoskeletal 80 OS=Homo sapiens OX=9606 GN=KRT80 PE=1 SV=2 - [K2C80_HUMAN]	2.45657e+09	4.68824e+09	2.43876e+09	3.64406e+09	2.78051e+09	3.09394e+09	0.993211	0.979371
Q13263	Transcription intermediary factor 1-beta OS=Homo sapiens OX=9606 GN=TRIM28 PE=1 SV=5 - [TIF1B_HUMAN]	6.21737e+07	6.38817e+07	5.75934e+07	1.73661e+08	1.59745e+08	1.42689e+08	2.59243	0.00043974
P17858	ATP-dependent 6-phosphofructokinase, liver type OS=Homo sapiens OX=9606 GN=PFKL PE=1 SV=6 - [PFKAL_HUMAN]	1.1868e+08	9.14703e+07	1.00359e+08	8.70475e+07	6.77727e+07	9.55598e+07	0.806352	0.155682
Q8NBS9	Thioredoxin domain-containing protein 5 OS=Homo sapiens OX=9606 GN=TXNDC5 PE=1 SV=2 - [TXND5_HUMAN]	9.33617e+06	4.03518e+06	2.53069e+06	4.62676e+07	3.61051e+07	4.15142e+07	7.79063	0.000555463
Q9BV38	WD repeat-containing protein 18 OS=Homo sapiens OX=9606 GN=WDR18 PE=1 SV=2 - [WDR18_HUMAN]	2.02778e+07	8.53051e+06	5.98824e+06	2.50864e+07	7.19219e+06	4.14452e+07	2.11871	0.296858
P24941	Cyclin-dependent kinase 2 OS=Homo sapiens OX=9606 GN=CDK2 PE=1 SV=2 - [CDK2_HUMAN]	1.77655e+08	1.79387e+08	1.87316e+08	1.89997e+08	1.71448e+08	2.28149e+08	1.0831	0.424042
Q6ZVM7	TOM1-like protein 2 OS=Homo sapiens OX=9606 GN=TOM1L2 PE=1 SV=1 - [TM1L2_HUMAN]	9.45798e+06	1.03326e+07	1.03879e+07	6.68165e+07	1.02064e+08	1.38528e+08	10.1863	0.0111321
P30153	Serine/threonine-protein phosphatase 2A 65 kDa regulatory subunit A alpha isoform OS=Homo sapiens OX=9606 GN=PPP2R1A PE=1 SV=4 - [2AAA_HUMAN]	4.7208e+06	1.1075e+07	4.52379e+06	3.52984e+07	8.29535e+07	2.34064e+07	6.97153	0.0918622
O76011	Keratin, type I cuticular Ha4 OS=Homo sapiens OX=9606 GN=KRT34 PE=1 SV=2 - [KRT34_HUMAN]	1.12965e+08	9.41854e+07	9.14576e+07	5.39316e+06	9.36599e+06	1.97161e+08	0.709694	0.673295
P60953	Cell division control protein 42 homolog OS=Homo sapiens OX=9606 GN=CDC42 PE=1 SV=2 - [CDC42_HUMAN]	1.66359e+07	1.74319e+06	5.26937e+06	5.69909e+06	5.5061e+06	7.07977e+07	3.46757	0.430229
Q86VP6	Cullin-associated NEDD8-dissociated protein 1 OS=Homo sapiens OX=9606 GN=CAND1 PE=1 SV=2 - [CAND1_HUMAN]	3.99613e+07	2.37282e+07	5.93452e+06	1.09079e+08	1.38614e+08	1.08672e+08	5.11842	0.00238038
O75616	GTPase Era, mitochondrial OS=Homo sapiens OX=9606 GN=ERAL1 PE=1 SV=2 - [ERAL1_HUMAN]	5.15082e+07	6.80753e+06	3.2259e+07	4.19925e+06	1.06844e+07	1.00215e+07	0.274968	0.170254
Q92804	TATA-binding protein-associated factor 2N OS=Homo sapiens OX=9606 GN=TAF15 PE=1 SV=1 - [RBP56_HUMAN]	5.36631e+06	5.52177e+06	3.09928e+06	9.4205e+07	8.37334e+07	9.69072e+07	19.6496	2.90244e-05
O14980	Exportin-1 OS=Homo sapiens OX=9606 GN=XPO1 PE=1 SV=1 - [XPO1_HUMAN]	1.18933e+09	4.69061e+08	7.37159e+08	1.02227e+08	3.99107e+08	6.92255e+07	0.238175	0.0606976
Q6ZVX7	F-box only protein 50 OS=Homo sapiens OX=9606 GN=NCCRP1 PE=1 SV=1 - [FBX50_HUMAN]	9.78725e+07	2.71515e+06	1.10191e+07	2.1777e+07	1.69232e+07	4.46553e+06	0.386766	0.500824
Q9BTE3	Mini-chromosome maintenance complex-binding protein OS=Homo sapiens OX=9606 GN=MCMBP PE=1 SV=2 - [MCMBP_HUMAN]	1.89908e+07	8.0922e+06	1.99949e+06	3.86911e+07	2.86712e+07	3.2664e+07	3.4394	0.014789
P31151	Protein S100-A7 OS=Homo sapiens OX=9606 GN=S100A7 PE=1 SV=4 - [S10A7_HUMAN]	2.56348e+07	5.80273e+06	1.19053e+07	8.55241e+06	5.70581e+06	1.04754e+07	0.570651	0.361461
P45880	Voltage-dependent anion-selective channel protein 2 OS=Homo sapiens OX=9606 GN=VDAC2 PE=1 SV=2 - [VDAC2_HUMAN]	7.82398e+07	4.12053e+06	5.67386e+06	1.26199e+07	1.40228e+08	9.40028e+07	2.80403	0.30092
Q10471	Polypeptide N-acetylgalactosaminyltransferase 2 OS=Homo sapiens OX=9606 GN=GALNT2 PE=1 SV=1 - [GALT2_HUMAN]	4.28918e+07	4.78031e+07	3.98175e+07	3.60551e+07	6.2023e+07	7.95208e+06	0.812414	0.632437
Q99986	Serine/threonine-protein kinase VRK1 OS=Homo sapiens OX=9606 GN=VRK1 PE=1 SV=1 - [VRK1_HUMAN]	1.13257e+07	1.02406e+07	5.36557e+06	1.99322e+07	4.41313e+07	4.95678e+07	4.21921	0.0358566
Q9H0F6	Sharpin OS=Homo sapiens OX=9606 GN=SHARPIN PE=1 SV=1 - [SHRPN_HUMAN]	7.51322e+06	1.53337e+07	6.57929e+06	1.25647e+08	6.78432e+07	1.76648e+08	12.5785	0.0227687
Q96LP6	Uncharacterized protein C12orf42 OS=Homo sapiens OX=9606 GN=C12orf42 PE=2 SV=2 - [CL042_HUMAN]	7.68013e+06	459307	9.47175e+06	1.18116e+07	9.66407e+06	7.62127e+06	1.65218	0.272103
Q16666	Gamma-interferon-inducible protein 16 OS=Homo sapiens OX=9606 GN=IFI16 PE=1 SV=3 - [IF16_HUMAN]	4.08329e+06	3.44244e+06	9.98271e+06	6.38463e+07	5.78695e+07	7.60318e+07	11.2944	0.000469357
Q9H5V9	STING ER exit protein OS=Homo sapiens OX=9606 GN=STEEP1 PE=1 SV=1 - [STEEP_HUMAN]	7.90192e+07	1.00125e+07	6.9107e+06	9.84118e+06	1.52373e+07	1.05817e+08	1.36432	0.78016
P43246	DNA mismatch repair protein Msh2 OS=Homo sapiens OX=9606 GN=MSH2 PE=1 SV=1 - [MSH2_HUMAN]	8.71639e+06	1.39214e+07	5.6979e+06	7.15724e+07	8.02501e+07	5.77293e+07	7.39533	0.00098288
Q9NVU7	Protein SDA1 homolog OS=Homo sapiens OX=9606 GN=SDAD1 PE=1 SV=3 - [SDA1_HUMAN]	5.09472e+07	5.57435e+07	1.04776e+07	3.94658e+07	5.36138e+07	4.50087e+07	1.17855	0.664852
Q14145	Kelch-like ECH-associated protein 1 OS=Homo sapiens OX=9606 GN=KEAP1 PE=1 SV=2 - [KEAP1_HUMAN]	4.76948e+06	8.572e+06	1.05249e+07	3.86456e+07	1.98193e+07	2.28058e+07	3.40524	0.0346278
P27708	CAD protein OS=Homo sapiens OX=9606 GN=CAD PE=1 SV=3 - [PYR1_HUMAN]	1.07242e+08	3.70379e+07	4.29067e+07	1.31301e+08	1.65505e+08	1.40218e+08	2.33469	0.0280392
Q9UHX1	Poly(U)-binding-splicing factor PUF60 OS=Homo sapiens OX=9606 GN=PUF60 PE=1 SV=1 - [PUF60_HUMAN]	7.1887e+06	1.81483e+06	5.02841e+07	8.41698e+07	1.64225e+08	9.85123e+07	5.85126	0.0298581
Q99933	BAG family molecular chaperone regulator 1 OS=Homo sapiens OX=9606 GN=BAG1 PE=1 SV=4 - [BAG1_HUMAN]	1.08305e+07	1.32272e+07	4.66971e+06	1.49796e+07	3.53694e+07	6.05292e+06	1.96335	0.365332
P55060	Exportin-2 OS=Homo sapiens OX=9606 GN=CSE1L PE=1 SV=3 - [XPO2_HUMAN]	5.45028e+06	4.05958e+06	1.30171e+07	8.07467e+07	8.97992e+07	8.90801e+07	11.5251	3.96004e-05
Q9Y5M8	Signal recognition particle receptor subunit beta OS=Homo sapiens OX=9606 GN=SRPRB PE=1 SV=3 - [SRPRB_HUMAN]	6.81697e+06	9.47569e+06	5.13773e+06	4.88278e+07	3.37808e+07	2.63646e+07	5.08498	0.0122777
Q13155	Aminoacyl tRNA synthase complex-interacting multifunctional protein 2 OS=Homo sapiens OX=9606 GN=AIMP2 PE=1 SV=2 - [AIMP2_HUMAN]	2.94732e+07	1.69361e+07	2.17212e+07	3.15186e+07	2.84495e+07	2.87608e+07	1.30234	0.143528
P51659	Peroxisomal multifunctional enzyme type 2 OS=Homo sapiens OX=9606 GN=HSD17B4 PE=1 SV=3 - [DHB4_HUMAN]	7.41169e+07	5.26781e+07	7.29498e+07	6.23895e+07	6.9029e+07	8.20671e+07	1.06879	0.639287
Q9Y277	Voltage-dependent anion-selective channel protein 3 OS=Homo sapiens OX=9606 GN=VDAC3 PE=1 SV=1 - [VDAC3_HUMAN]	5.76944e+06	8.59163e+06	4.6134e+06	1.23474e+07	9.48424e+06	6.88918e+06	1.51365	0.174456
P21796	Voltage-dependent anion-selective channel protein 1 OS=Homo sapiens OX=9606 GN=VDAC1 PE=1 SV=2 - [VDAC1_HUMAN]	8.06141e+06	8.59163e+06	1.99336e+07	1.023e+07	4.06381e+06	1.04819e+07	0.677179	0.421894
O75808	Calpain-15 OS=Homo sapiens OX=9606 GN=CAPN15 PE=1 SV=1 - [CAN15_HUMAN]	1.23877e+07	7.1683e+06	7.22517e+06	4.0052e+08	1.76954e+08	2.25023e+08	29.965	0.0190297
Q8TBB5	Kelch domain-containing protein 4 OS=Homo sapiens OX=9606 GN=KLHDC4 PE=1 SV=1 - [KLDC4_HUMAN]	4.71254e+07	3.86402e+07	2.37529e+07	5.82276e+07	3.56995e+07	3.3065e+07	1.15955	0.608905
P19784	Casein kinase II subunit alpha' OS=Homo sapiens OX=9606 GN=CSNK2A2 PE=1 SV=1 - [CSK22_HUMAN]	1.74243e+07	3.51526e+06	5.43821e+06	5.73504e+07	9.09221e+06	1.68979e+09	66.5801	0.355475
P52948	Nuclear pore complex protein Nup98-Nup96 OS=Homo sapiens OX=9606 GN=NUP98 PE=1 SV=4 - [NUP98_HUMAN]	2.03525e+07	1.16336e+07	4.4677e+06	1.39221e+08	1.60534e+08	1.10815e+09	38.6215	0.22574
P30566	Adenylosuccinate lyase OS=Homo sapiens OX=9606 GN=ADSL PE=1 SV=2 - [PUR8_HUMAN]	8.08939e+06	1.75455e+07	4.24726e+06	2.54189e+07	1.40874e+07	9.60863e+06	1.64362	0.355644
O43474	Krueppel-like factor 4 OS=Homo sapiens OX=9606 GN=KLF4 PE=1 SV=3 - [KLF4_HUMAN]	6.18599e+07	4.96434e+07	6.8107e+07	4.04883e+07	4.32531e+07	4.28235e+07	0.704664	0.0322518
Q7Z5A8	Chemokine-like protein TAFA-3 OS=Homo sapiens OX=9606 GN=TAFA3 PE=2 SV=1 - [TAFA3_HUMAN]	1.23081e+07	8.41481e+06	5.08353e+06	3.36692e+06	1.54542e+07	9.29227e+06	1.0894	0.859209
Q13601	KRR1 small subunit processome component homolog OS=Homo sapiens OX=9606 GN=KRR1 PE=1 SV=4 - [KRR1_HUMAN]	9.69023e+06	2.23679e+06	3.20879e+06	6.08182e+07	7.55171e+07	7.97345e+07	14.2754	0.000414426
O00422	Histone deacetylase complex subunit SAP18 OS=Homo sapiens OX=9606 GN=SAP18 PE=1 SV=1 - [SAP18_HUMAN]	1.10443e+07	5.3496e+06	3.42696e+06	1.14298e+07	5.56586e+07	2.09576e+08	13.9582	0.227369
P23381	Tryptophan--tRNA ligase, cytoplasmic OS=Homo sapiens OX=9606 GN=WARS1 PE=1 SV=2 - [SYWC_HUMAN]	6.73232e+07	9.6273e+06	5.59138e+07	1.67258e+08	6.05071e+07	9.76963e+07	2.44958	0.148385
Q12765	Secernin-1 OS=Homo sapiens OX=9606 GN=SCRN1 PE=1 SV=2 - [SCRN1_HUMAN]	9.30158e+08	5.99654e+06	5.83176e+06	1.02236e+07	1.00808e+07	8.30414e+06	0.0303704	0.378979
Q52LJ0	Protein FAM98B OS=Homo sapiens OX=9606 GN=FAM98B PE=1 SV=2 - [FA98B_HUMAN]	1.28619e+07	3.81215e+07	1.72095e+07	3.60776e+07	5.52588e+07	3.26007e+07	1.81745	0.151748
Q9BW27	Nuclear pore complex protein Nup85 OS=Homo sapiens OX=9606 GN=NUP85 PE=1 SV=1 - [NUP85_HUMAN]	5.12493e+06	7.43705e+06	4.3929e+08	1.31403e+07	3.6285e+08	3.07817e+08	1.51334	0.690625
P11182	Lipoamide acyltransferase component of branched-chain alpha-keto acid dehydrogenase complex, mitochondrial OS=Homo sapiens OX=9606 GN=DBT PE=1 SV=3 - [ODB2_HUMAN]	5.05462e+07	4.24453e+07	3.35312e+07	1.22341e+07	1.1105e+07	9.1599e+06	0.256862	0.00329349
Q9NZ09	Ubiquitin-associated protein 1 OS=Homo sapiens OX=9606 GN=UBAP1 PE=1 SV=1 - [UBAP1_HUMAN]	3.43815e+06	5.23406e+06	2.20309e+06	6.34273e+07	5.39493e+07	6.19941e+06	11.363	0.101486
Q9Y6V7	Probable ATP-dependent RNA helicase DDX49 OS=Homo sapiens OX=9606 GN=DDX49 PE=1 SV=1 - [DDX49_HUMAN]	2.65922e+07	1.53741e+07	1.88675e+07	5.04063e+07	3.65584e+07	3.42215e+07	1.99209	0.0291018
Q9BSC4	Nucleolar protein 10 OS=Homo sapiens OX=9606 GN=NOL10 PE=1 SV=1 - [NOL10_HUMAN]	6.03616e+06	6.37989e+06	4.54989e+06	6.94129e+07	9.64849e+07	6.68257e+07	13.7171	0.00163299
Q9H845	Complex I assembly factor ACAD9, mitochondrial OS=Homo sapiens OX=9606 GN=ACAD9 PE=1 SV=1 - [ACAD9_HUMAN]	4.10534e+07	2.68757e+07	2.15562e+07	5.26416e+07	5.63339e+07	7.14931e+07	2.01674	0.0208052
P30989	Neurotensin receptor type 1 OS=Homo sapiens OX=9606 GN=NTSR1 PE=1 SV=2 - [NTR1_HUMAN]	7.09908e+06	3.58582e+07	6.80187e+06	5.91112e+06	5.66757e+06	6.52977e+06	0.363922	0.335238
Q8N556	Actin filament-associated protein 1 OS=Homo sapiens OX=9606 GN=AFAP1 PE=1 SV=2 - [AFAP1_HUMAN]	6.43362e+06	6.35253e+06	6.74132e+06	4.40794e+07	6.48409e+07	4.43368e+07	7.84827	0.00292313
P05023	Sodium/potassium-transporting ATPase subunit alpha-1 OS=Homo sapiens OX=9606 GN=ATP1A1 PE=1 SV=1 - [AT1A1_HUMAN]	1.12286e+08	4.16929e+07	8.39077e+07	1.37463e+09	1.39672e+09	1.70982e+09	18.8375	0.000212123
Q9BR76	Coronin-1B OS=Homo sapiens OX=9606 GN=CORO1B PE=1 SV=1 - [COR1B_HUMAN]	7.49709e+06	8.71337e+06	1.34546e+07	4.56307e+07	3.71768e+07	3.51665e+07	3.97686	0.00133171
Q9BTD8	RNA-binding protein 42 OS=Homo sapiens OX=9606 GN=RBM42 PE=1 SV=1 - [RBM42_HUMAN]	5.05217e+07	4.52182e+07	4.79624e+07	5.671e+07	4.23189e+07	5.55006e+07	1.07535	0.498664
P11172	Uridine 5'-monophosphate synthase OS=Homo sapiens OX=9606 GN=UMPS PE=1 SV=1 - [UMPS_HUMAN]	7.58581e+07	3.69328e+07	3.19807e+07	8.21866e+07	4.91163e+07	7.56848e+07	1.42975	0.293642
Q9Y4E8	Ubiquitin carboxyl-terminal hydrolase 15 OS=Homo sapiens OX=9606 GN=USP15 PE=1 SV=3 - [UBP15_HUMAN]	8.48451e+06	6.47074e+06	8.69045e+06	7.8948e+07	7.87022e+07	5.28024e+07	8.90025	0.00201962
Q8NEZ5	F-box only protein 22 OS=Homo sapiens OX=9606 GN=FBXO22 PE=1 SV=1 - [FBX22_HUMAN]	4.94829e+06	8.0235e+06	3.85313e+06	4.78395e+07	7.90959e+07	8.61054e+07	12.6622	0.00522623
Q9UK22	F-box only protein 2 OS=Homo sapiens OX=9606 GN=FBXO2 PE=1 SV=2 - [FBX2_HUMAN]	3.29489e+06	1.08178e+07	2.90197e+06	1.1429e+07	6.32341e+07	4.86463e+06	4.67408	0.326186
P35659	Protein DEK OS=Homo sapiens OX=9606 GN=DEK PE=1 SV=1 - [DEK_HUMAN]	3.62387e+06	5.75506e+06	5.50725e+06	7.27478e+07	8.58015e+07	6.60337e+07	15.0867	0.000279677
P40763	Signal transducer and activator of transcription 3 OS=Homo sapiens OX=9606 GN=STAT3 PE=1 SV=2 - [STAT3_HUMAN]	3.80898e+07	3.89421e+06	3.91823e+07	1.09549e+08	1.41595e+08	1.26872e+08	4.65731	0.00262331
O95336	6-phosphogluconolactonase OS=Homo sapiens OX=9606 GN=PGLS PE=1 SV=2 - [6PGL_HUMAN]	4.60063e+06	1.65795e+07	8.41481e+06	5.61129e+06	6.92364e+06	7.30625e+06	0.670424	0.413997
P63151	Serine/threonine-protein phosphatase 2A 55 kDa regulatory subunit B alpha isoform OS=Homo sapiens OX=9606 GN=PPP2R2A PE=1 SV=1 - [2ABA_HUMAN]	1.40815e+07	1.72728e+07	1.65164e+07	4.80622e+07	1.0138e+08	7.89097e+07	4.77018	0.0177635
O43670	BUB3-interacting and GLEBS motif-containing protein ZNF207 OS=Homo sapiens OX=9606 GN=ZNF207 PE=1 SV=1 - [ZN207_HUMAN]	6.41956e+08	5.78644e+08	6.77948e+08	4.55571e+08	3.37404e+08	5.48e+08	0.706315	0.0512015
Q9H479	Fructosamine-3-kinase OS=Homo sapiens OX=9606 GN=FN3K PE=1 SV=1 - [FN3K_HUMAN]	1.32584e+07	1.14703e+07	7.03296e+06	8.94097e+06	7.31385e+06	3.46759e+06	0.620951	0.178334
Q6L8Q7	2',5'-phosphodiesterase 12 OS=Homo sapiens OX=9606 GN=PDE12 PE=1 SV=2 - [PDE12_HUMAN]	5.58993e+06	1.29523e+07	4.93254e+06	3.75263e+07	4.70275e+07	5.69227e+07	6.02676	0.00308979
Q9UKG1	DCC-interacting protein 13-alpha OS=Homo sapiens OX=9606 GN=APPL1 PE=1 SV=1 - [DP13A_HUMAN]	4.69274e+06	3.56236e+06	5.64131e+06	6.76647e+07	9.96938e+07	3.14597e+07	14.3072	0.0353228
P08559	Pyruvate dehydrogenase E1 component subunit alpha, somatic form, mitochondrial OS=Homo sapiens OX=9606 GN=PDHA1 PE=1 SV=3 - [ODPA_HUMAN]	5.58103e+06	1.00952e+08	1.02874e+08	1.10319e+08	6.73232e+07	5.12589e+07	1.09309	0.867845
P35080	Profilin-2 OS=Homo sapiens OX=9606 GN=PFN2 PE=1 SV=3 - [PROF2_HUMAN]	5.03374e+06	9.14531e+06	1.82593e+06	5.71095e+06	5.85606e+06	1.69303e+07	1.78053	0.385404
P11310	Medium-chain specific acyl-CoA dehydrogenase, mitochondrial OS=Homo sapiens OX=9606 GN=ACADM PE=1 SV=1 - [ACADM_HUMAN]	6.75114e+06	4.01167e+07	1.48247e+07	1.84997e+07	9.19042e+06	6.92028e+06	0.561015	0.444629
Q7Z2W4	Zinc finger CCCH-type antiviral protein 1 OS=Homo sapiens OX=9606 GN=ZC3HAV1 PE=1 SV=3 - [ZCCHV_HUMAN]	4.01203e+06	4.6778e+06	2.00778e+07	3.9953e+07	6.46434e+07	4.98262e+07	5.36792	0.00922719
Q9Y5Y2	Cytosolic Fe-S cluster assembly factor NUBP2 OS=Homo sapiens OX=9606 GN=NUBP2 PE=1 SV=1 - [NUBP2_HUMAN]	4.8363e+07	2.32963e+07	5.64444e+06	9.62997e+06	1.58986e+07	5.58789e+07	1.05309	0.946241
O60547	GDP-mannose 4,6 dehydratase OS=Homo sapiens OX=9606 GN=GMDS PE=1 SV=1 - [GMDS_HUMAN]	6.17112e+06	3.73972e+06	9.56279e+06	6.64759e+06	1.14958e+07	7.3391e+07	4.70043	0.327493
P84095	Rho-related GTP-binding protein RhoG OS=Homo sapiens OX=9606 GN=RHOG PE=1 SV=1 - [RHOG_HUMAN]	1.10244e+07	3.51453e+06	1.47192e+07	4.4646e+06	1.10612e+07	6.966e+06	0.768734	0.586282
Q53EZ4	Centrosomal protein of 55 kDa OS=Homo sapiens OX=9606 GN=CEP55 PE=1 SV=3 - [CEP55_HUMAN]	1.54757e+07	4.07339e+06	3.59286e+06	4.07501e+07	4.32861e+07	2.54824e+07	4.73247	0.0132073
P51812	Ribosomal protein S6 kinase alpha-3 OS=Homo sapiens OX=9606 GN=RPS6KA3 PE=1 SV=1 - [KS6A3_HUMAN]	8.97637e+06	5.35665e+06	1.11993e+07	3.01635e+07	3.57713e+07	1.95139e+07	3.34669	0.0168885
Q9H0D6	5'-3' exoribonuclease 2 OS=Homo sapiens OX=9606 GN=XRN2 PE=1 SV=1 - [XRN2_HUMAN]	7.74321e+06	6.10179e+06	3.61434e+06	6.4527e+07	5.87192e+06	5.57512e+07	7.22537	0.118903
Q9H6R4	Nucleolar protein 6 OS=Homo sapiens OX=9606 GN=NOL6 PE=1 SV=2 - [NOL6_HUMAN]	3.28213e+06	5.00938e+06	5.47793e+06	4.48312e+07	4.59544e+07	4.53846e+07	9.88931	6.5578e-07
Q9UI43	rRNA methyltransferase 2, mitochondrial OS=Homo sapiens OX=9606 GN=MRM2 PE=1 SV=1 - [MRM2_HUMAN]	7.5538e+07	8.52105e+06	7.56271e+07	5.43067e+06	3.79298e+06	4.70447e+06	0.0872218	0.0954881
Q9Y6K5	2'-5'-oligoadenylate synthase 3 OS=Homo sapiens OX=9606 GN=OAS3 PE=1 SV=3 - [OAS3_HUMAN]	8.64882e+07	4.25159e+07	3.99779e+07	5.62247e+07	5.16226e+07	6.55912e+07	1.02637	0.928932
Q99456	Keratin, type I cytoskeletal 12 OS=Homo sapiens OX=9606 GN=KRT12 PE=1 SV=1 - [K1C12_HUMAN]	5.73124e+09	4.33805e+09	1.18429e+10	2.47881e+09	2.41103e+09	2.45913e+09	0.335383	0.102935
P35221	Catenin alpha-1 OS=Homo sapiens OX=9606 GN=CTNNA1 PE=1 SV=1 - [CTNA1_HUMAN]	4.65636e+07	6.42293e+06	2.62807e+07	5.19817e+07	2.79608e+07	3.17995e+07	1.40969	0.475935
Q8TAT6	Nuclear protein localization protein 4 homolog OS=Homo sapiens OX=9606 GN=NPLOC4 PE=1 SV=3 - [NPL4_HUMAN]	1.80138e+07	4.79168e+06	2.80954e+06	7.03672e+07	1.06923e+08	6.00766e+07	9.26671	0.00925695
Q9NY12	H/ACA ribonucleoprotein complex subunit 1 OS=Homo sapiens OX=9606 GN=GAR1 PE=1 SV=1 - [GAR1_HUMAN]	7.57913e+06	5.80313e+06	5.81199e+06	6.53973e+06	5.2576e+07	6.22901e+07	6.32512	0.118762
Q7KZF4	Staphylococcal nuclease domain-containing protein 1 OS=Homo sapiens OX=9606 GN=SND1 PE=1 SV=1 - [SND1_HUMAN]	8.87921e+06	4.02512e+06	2.27742e+07	7.37786e+07	5.14761e+07	4.44291e+07	4.7559	0.0130266
Q9Y697	Cysteine desulfurase, mitochondrial OS=Homo sapiens OX=9606 GN=NFS1 PE=1 SV=3 - [NFS1_HUMAN]	4.75651e+07	3.65838e+07	2.48269e+07	5.79859e+07	4.55485e+07	2.65922e+07	1.19409	0.564631
P62910	60S ribosomal protein L32 OS=Homo sapiens OX=9606 GN=RPL32 PE=1 SV=2 - [RL32_HUMAN]	8.27886e+06	3.96475e+06	2.21488e+06	5.14094e+06	1.25606e+07	3.87778e+06	1.4925	0.506034
P61158	Actin-related protein 3 OS=Homo sapiens OX=9606 GN=ACTR3 PE=1 SV=3 - [ARP3_HUMAN]	1.20757e+07	1.40105e+07	3.31643e+06	6.37446e+07	1.39407e+07	9.72522e+06	2.97289	0.334963
Q9UI10	Translation initiation factor eIF-2B subunit delta OS=Homo sapiens OX=9606 GN=EIF2B4 PE=1 SV=2 - [EI2BD_HUMAN]	9.44749e+06	6.16031e+07	3.89252e+07	7.89879e+06	4.61331e+07	5.31328e+07	0.97444	0.965949
O75629	Protein CREG1 OS=Homo sapiens OX=9606 GN=CREG1 PE=1 SV=1 - [CREG1_HUMAN]	3.26346e+07	2.14697e+07	2.29458e+06	1.11621e+07	8.51102e+06	4.77742e+06	0.433528	0.304593
Q16658	Fascin OS=Homo sapiens OX=9606 GN=FSCN1 PE=1 SV=3 - [FSCN1_HUMAN]	5.96203e+07	6.05112e+07	4.88143e+07	5.88974e+07	9.56857e+07	9.38986e+07	1.47078	0.102244
Q9NRG9	Aladin OS=Homo sapiens OX=9606 GN=AAAS PE=1 SV=1 - [AAAS_HUMAN]	2.49442e+07	7.66365e+06	3.90909e+06	5.80342e+07	3.60951e+07	5.06795e+07	3.96553	0.0168193
O60563	Cyclin-T1 OS=Homo sapiens OX=9606 GN=CCNT1 PE=1 SV=1 - [CCNT1_HUMAN]	7.29902e+07	4.27079e+07	9.52292e+07	1.03412e+07	1.23183e+07	5.75415e+07	0.380231	0.114599
P49589	Cysteine--tRNA ligase, cytoplasmic OS=Homo sapiens OX=9606 GN=CARS1 PE=1 SV=3 - [SYCC_HUMAN]	9.22297e+06	5.57137e+06	6.80234e+06	2.47994e+07	4.24423e+07	3.06418e+07	4.53234	0.00865377
Q8IVM0	Coiled-coil domain-containing protein 50 OS=Homo sapiens OX=9606 GN=CCDC50 PE=1 SV=1 - [CCD50_HUMAN]	4.55462e+06	3.97411e+06	1.59926e+07	7.14004e+06	2.42268e+07	9.05762e+06	1.64854	0.471386
O43488	Aflatoxin B1 aldehyde reductase member 2 OS=Homo sapiens OX=9606 GN=AKR7A2 PE=1 SV=3 - [ARK72_HUMAN]	3.54504e+07	1.01431e+07	6.05376e+06	1.02555e+07	4.33732e+07	2.17513e+07	1.45951	0.585888
Q12792	Twinfilin-1 OS=Homo sapiens OX=9606 GN=TWF1 PE=1 SV=3 - [TWF1_HUMAN]	8.22965e+06	6.00736e+06	8.47981e+06	7.44634e+06	3.48535e+07	2.3129e+07	2.88019	0.148889
Q15796	Mothers against decapentaplegic homolog 2 OS=Homo sapiens OX=9606 GN=SMAD2 PE=1 SV=1 - [SMAD2_HUMAN]	2.49852e+08	2.4014e+08	1.61852e+08	2.80806e+08	3.07839e+08	2.30789e+08	1.2571	0.194194
P47897	Glutamine--tRNA ligase OS=Homo sapiens OX=9606 GN=QARS1 PE=1 SV=1 - [SYQ_HUMAN]	4.91504e+07	3.3584e+08	1.74727e+07	2.96803e+07	2.43716e+07	1.49745e+07	0.17151	0.334374
P13987	CD59 glycoprotein OS=Homo sapiens OX=9606 GN=CD59 PE=1 SV=1 - [CD59_HUMAN]	4.06775e+06	6.58385e+06	3.79771e+06	1.70989e+07	1.31085e+07	1.40562e+07	3.06337	0.00266058
Q3ZCQ8	Mitochondrial import inner membrane translocase subunit TIM50 OS=Homo sapiens OX=9606 GN=TIMM50 PE=1 SV=2 - [TIM50_HUMAN]	8.60815e+07	4.41558e+07	3.28304e+06	5.43896e+06	7.8611e+06	5.12919e+06	0.138026	0.183989
Q9Y5J1	U3 small nucleolar RNA-associated protein 18 homolog OS=Homo sapiens OX=9606 GN=UTP18 PE=1 SV=3 - [UTP18_HUMAN]	1.65692e+07	1.13635e+07	4.72768e+06	6.66315e+07	1.4799e+07	5.38484e+07	4.14199	0.0987591
P59780	AP-3 complex subunit sigma-2 OS=Homo sapiens OX=9606 GN=AP3S2 PE=2 SV=1 - [AP3S2_HUMAN]	7.6419e+06	9.30065e+06	4.67521e+06	6.57655e+06	7.36881e+06	1.0284e+07	1.12081	0.646978
O75131	Copine-3 OS=Homo sapiens OX=9606 GN=CPNE3 PE=1 SV=1 - [CPNE3_HUMAN]	4.5679e+06	9.98755e+06	7.86383e+06	4.69656e+07	2.30522e+07	9.28197e+06	3.53712	0.163421
P50990	T-complex protein 1 subunit theta OS=Homo sapiens OX=9606 GN=CCT8 PE=1 SV=4 - [TCPQ_HUMAN]	1.24773e+07	1.91578e+06	3.20679e+06	6.17313e+07	4.26791e+06	6.82251e+07	7.62645	0.132102
P52788	Spermine synthase OS=Homo sapiens OX=9606 GN=SMS PE=1 SV=2 - [SPSY_HUMAN]	7.40465e+06	7.98024e+06	1.88365e+06	6.46223e+06	1.4797e+07	5.83419e+06	1.56895	0.400133
Q5T6F0	DDB1- and CUL4-associated factor 12 OS=Homo sapiens OX=9606 GN=DCAF12 PE=1 SV=1 - [DCA12_HUMAN]	3.64218e+07	2.36707e+07	2.72584e+07	6.91981e+06	2.49481e+06	1.33839e+07	0.260999	0.0121071
Q7Z2W9	39S ribosomal protein L21, mitochondrial OS=Homo sapiens OX=9606 GN=MRPL21 PE=1 SV=2 - [RM21_HUMAN]	5.65961e+07	1.59583e+07	4.44176e+06	3.67388e+07	4.24255e+06	4.52903e+07	1.12047	0.885556
P63092	Guanine nucleotide-binding protein G(s) subunit alpha isoforms short OS=Homo sapiens OX=9606 GN=GNAS PE=1 SV=1 - [GNAS2_HUMAN]	1.30141e+08	1.6539e+08	1.93452e+08	5.5296e+08	3.42707e+08	5.38996e+08	2.93397	0.0109584
Q6GQQ9	OTU domain-containing protein 7B OS=Homo sapiens OX=9606 GN=OTUD7B PE=1 SV=1 - [OTU7B_HUMAN]	8.26911e+06	6.16812e+06	5.83742e+06	8.50495e+07	9.68132e+07	6.87473e+07	12.3608	0.00071539
Q6RFH5	WD repeat-containing protein 74 OS=Homo sapiens OX=9606 GN=WDR74 PE=1 SV=1 - [WDR74_HUMAN]	2.62084e+06	5.92301e+06	4.32449e+06	3.16434e+07	5.60535e+07	3.18486e+06	7.06242	0.164564
P38606	V-type proton ATPase catalytic subunit A OS=Homo sapiens OX=9606 GN=ATP6V1A PE=1 SV=2 - [VATA_HUMAN]	6.49996e+06	1.20356e+07	3.53089e+06	1.38156e+07	1.21117e+07	1.5523e+07	1.87844	0.0734503
Q99439	Calponin-2 OS=Homo sapiens OX=9606 GN=CNN2 PE=1 SV=4 - [CNN2_HUMAN]	2.92311e+07	3.97852e+06	7.77494e+06	7.35044e+06	3.6442e+07	5.83043e+07	2.49111	0.290078
P05089	Arginase-1 OS=Homo sapiens OX=9606 GN=ARG1 PE=1 SV=2 - [ARGI1_HUMAN]	3.11149e+07	7.71161e+06	4.51493e+07	2.12875e+07	6.55334e+06	8.96766e+06	0.438322	0.254727
P07948	Tyrosine-protein kinase Lyn OS=Homo sapiens OX=9606 GN=LYN PE=1 SV=3 - [LYN_HUMAN]	1.77655e+08	1.79387e+08	1.87316e+08	8.43977e+07	1.59901e+08	1.30349e+08	0.688237	0.0631705
P25787	Proteasome subunit alpha type-2 OS=Homo sapiens OX=9606 GN=PSMA2 PE=1 SV=2 - [PSA2_HUMAN]	3.94174e+06	5.19539e+06	6.34593e+06	1.19392e+07	5.67662e+06	1.48741e+07	2.09842	0.112886
P53597	Succinate--CoA ligase [ADP/GDP-forming] subunit alpha, mitochondrial OS=Homo sapiens OX=9606 GN=SUCLG1 PE=1 SV=4 - [SUCA_HUMAN]	7.06227e+06	4.72342e+06	6.20402e+07	4.39543e+07	3.6851e+07	2.39032e+07	1.41832	0.627647
P27694	Replication protein A 70 kDa DNA-binding subunit OS=Homo sapiens OX=9606 GN=RPA1 PE=1 SV=2 - [RFA1_HUMAN]	2.53117e+07	4.68494e+06	8.77702e+06	9.1415e+06	8.92425e+06	3.89603e+07	1.47074	0.633362
O75083	WD repeat-containing protein 1 OS=Homo sapiens OX=9606 GN=WDR1 PE=1 SV=4 - [WDR1_HUMAN]	5.55402e+06	8.16771e+06	3.75167e+06	3.92857e+07	6.31903e+07	2.99655e+07	7.57961	0.0184427
P40926	Malate dehydrogenase, mitochondrial OS=Homo sapiens OX=9606 GN=MDH2 PE=1 SV=3 - [MDHM_HUMAN]	5.32951e+07	2.82706e+07	4.88457e+06	2.5747e+07	1.15309e+07	6.49096e+06	0.506289	0.400004
Q9NYL2	Mitogen-activated protein kinase kinase kinase 20 OS=Homo sapiens OX=9606 GN=MAP3K20 PE=1 SV=3 - [M3K20_HUMAN]	7.69292e+06	9.41872e+06	7.85457e+06	3.77481e+07	3.06971e+07	5.16737e+06	2.94849	0.17719
P35580	Myosin-10 OS=Homo sapiens OX=9606 GN=MYH10 PE=1 SV=3 - [MYH10_HUMAN]	6.84776e+06	1.48226e+07	5.29747e+07	4.70005e+08	4.70755e+08	4.15537e+08	18.1699	5.09086e-05
O75746	Calcium-binding mitochondrial carrier protein Aralar1 OS=Homo sapiens OX=9606 GN=SLC25A12 PE=1 SV=2 - [CMC1_HUMAN]	9.00111e+07	5.4938e+07	4.35419e+07	6.49443e+07	5.81873e+07	3.77716e+07	0.853639	0.60048
Q9NTK5	Obg-like ATPase 1 OS=Homo sapiens OX=9606 GN=OLA1 PE=1 SV=2 - [OLA1_HUMAN]	4.7857e+06	9.3972e+06	8.33991e+06	6.81731e+07	1.54875e+07	4.46637e+07	5.69753	0.082508
Q9P035	Very-long-chain (3R)-3-hydroxyacyl-CoA dehydratase 3 OS=Homo sapiens OX=9606 GN=HACD3 PE=1 SV=2 - [HACD3_HUMAN]	2.89073e+06	7.09711e+06	3.73532e+06	4.83807e+06	1.10742e+07	5.0013e+07	4.80395	0.287418
Q14565	Meiotic recombination protein DMC1/LIM15 homolog OS=Homo sapiens OX=9606 GN=DMC1 PE=1 SV=2 - [DMC1_HUMAN]	1.51425e+07	5.90375e+06	2.35354e+06	7.56863e+06	3.04676e+08	8.71156e+06	13.7162	0.372747
Q96T37	RNA-binding protein 15 OS=Homo sapiens OX=9606 GN=RBM15 PE=1 SV=2 - [RBM15_HUMAN]	9.16879e+06	5.39952e+06	3.59435e+06	4.10023e+07	8.24278e+06	4.35207e+07	5.1075	0.0962395
P49720	Proteasome subunit beta type-3 OS=Homo sapiens OX=9606 GN=PSMB3 PE=1 SV=2 - [PSB3_HUMAN]	2.53556e+07	1.53507e+07	1.32758e+07	1.51688e+07	9.48752e+06	1.76565e+07	0.783831	0.430854
P52701	DNA mismatch repair protein Msh6 OS=Homo sapiens OX=9606 GN=MSH6 PE=1 SV=2 - [MSH6_HUMAN]	8.62684e+06	4.73382e+07	4.14883e+07	7.09353e+07	1.53813e+08	5.42831e+07	2.86323	0.141033
P61081	NEDD8-conjugating enzyme Ubc12 OS=Homo sapiens OX=9606 GN=UBE2M PE=1 SV=1 - [UBC12_HUMAN]	7.8339e+06	3.5375e+06	3.05491e+06	1.24246e+07	1.29164e+07	7.79436e+06	2.29687	0.0489316
Q09161	Nuclear cap-binding protein subunit 1 OS=Homo sapiens OX=9606 GN=NCBP1 PE=1 SV=1 - [NCBP1_HUMAN]	1.14274e+07	4.84915e+06	7.51322e+06	1.19117e+08	4.02392e+07	3.59578e+07	8.20997	0.102533
P06307	Cholecystokinin OS=Homo sapiens OX=9606 GN=CCK PE=1 SV=1 - [CCKN_HUMAN]	1.36321e+07	6.67853e+06	5.89271e+06	1.29702e+07	9.59333e+06	562152	0.882549	0.828836
Q86YZ3	Hornerin OS=Homo sapiens OX=9606 GN=HRNR PE=1 SV=2 - [HORN_HUMAN]	6.21306e+07	3.67905e+06	3.37621e+07	5.51642e+06	4.15437e+06	1.04543e+07	0.202117	0.19395
P60660	Myosin light polypeptide 6 OS=Homo sapiens OX=9606 GN=MYL6 PE=1 SV=2 - [MYL6_HUMAN]	6.00153e+06	6.02864e+06	3.2282e+06	1.883e+06	1.52436e+07	3.70046e+07	3.54764	0.275898
P10599	Thioredoxin OS=Homo sapiens OX=9606 GN=TXN PE=1 SV=3 - [THIO_HUMAN]	1.17479e+07	7.25025e+06	1.0334e+07	7.77871e+06	4.1641e+07	9.46453e+06	2.00749	0.42486
O14880	Microsomal glutathione S-transferase 3 OS=Homo sapiens OX=9606 GN=MGST3 PE=1 SV=1 - [MGST3_HUMAN]	3.49672e+07	2.87229e+07	3.58365e+06	3.21229e+07	5.46152e+07	4.02058e+07	1.88697	0.162406
Q86W42	THO complex subunit 6 homolog OS=Homo sapiens OX=9606 GN=THOC6 PE=1 SV=1 - [THOC6_HUMAN]	7.90427e+06	4.6051e+06	3.03844e+06	6.55425e+06	4.77676e+06	9.17515e+06	1.31891	0.437984
P62633	CCHC-type zinc finger nucleic acid binding protein OS=Homo sapiens OX=9606 GN=CNBP PE=1 SV=1 - [CNBP_HUMAN]	1.62346e+08	7.47012e+06	5.79498e+07	2.11166e+08	1.33911e+08	1.53408e+08	2.18858	0.152545
Q8NI36	WD repeat-containing protein 36 OS=Homo sapiens OX=9606 GN=WDR36 PE=1 SV=1 - [WDR36_HUMAN]	1.40942e+07	1.49672e+07	4.10031e+06	7.83212e+07	1.05145e+08	5.81671e+07	7.2865	0.00777622
Q8TAP9	M-phase-specific PLK1-interacting protein OS=Homo sapiens OX=9606 GN=MPLKIP PE=1 SV=1 - [MPLKI_HUMAN]	1.9196e+07	4.7266e+07	6.96649e+06	2.02329e+07	7.86601e+06	6.46312e+06	0.47069	0.365561
Q12974	Protein tyrosine phosphatase type IVA 2 OS=Homo sapiens OX=9606 GN=PTP4A2 PE=1 SV=1 - [TP4A2_HUMAN]	6.09122e+06	7.66684e+06	8.95027e+06	3.37831e+07	8.08883e+06	5.70502e+06	2.09513	0.410392
Q92688	Acidic leucine-rich nuclear phosphoprotein 32 family member B OS=Homo sapiens OX=9606 GN=ANP32B PE=1 SV=1 - [AN32B_HUMAN]	1.46054e+07	1.66256e+07	1.12818e+07	8.11691e+06	1.41991e+07	1.29648e+07	0.829888	0.376146
P40429	60S ribosomal protein L13a OS=Homo sapiens OX=9606 GN=RPL13A PE=1 SV=2 - [RL13A_HUMAN]	5.9226e+06	7.62127e+06	4.71884e+06	1.80685e+08	2.11664e+08	1.88645e+08	31.8131	3.60725e-05
P12956	X-ray repair cross-complementing protein 6 OS=Homo sapiens OX=9606 GN=XRCC6 PE=1 SV=2 - [XRCC6_HUMAN]	1.87255e+07	1.907e+07	5.58877e+06	6.31553e+07	7.97345e+07	4.3002e+07	4.28478	0.0145295
Q96EI5	Transcription elongation factor A protein-like 4 OS=Homo sapiens OX=9606 GN=TCEAL4 PE=1 SV=2 - [TCAL4_HUMAN]	6.61725e+06	3.34847e+07	6.16416e+07	5.52982e+06	1.07577e+08	1.3905e+07	1.24836	0.828189
Q5UIP0	Telomere-associated protein RIF1 OS=Homo sapiens OX=9606 GN=RIF1 PE=1 SV=2 - [RIF1_HUMAN]	4.66518e+06	6.04663e+06	6.40737e+06	6.88856e+07	2.27679e+07	9.02047e+07	10.6231	0.0509386
O14744	Protein arginine N-methyltransferase 5 OS=Homo sapiens OX=9606 GN=PRMT5 PE=1 SV=4 - [ANM5_HUMAN]	1.79043e+07	5.14914e+06	4.55525e+06	3.50279e+07	4.09767e+07	7.23204e+07	5.37241	0.0312102
Q16643	Drebrin OS=Homo sapiens OX=9606 GN=DBN1 PE=1 SV=4 - [DREB_HUMAN]	4.18269e+06	1.06378e+07	2.9175e+06	3.96275e+07	6.94562e+07	1.7772e+07	7.15163	0.0745269
Q15181	Inorganic pyrophosphatase OS=Homo sapiens OX=9606 GN=PPA1 PE=1 SV=2 - [IPYR_HUMAN]	5.46617e+06	3.53873e+06	6.75723e+06	5.34219e+06	3.5186e+07	7.08531e+06	3.02076	0.335888
Q16822	Phosphoenolpyruvate carboxykinase [GTP], mitochondrial OS=Homo sapiens OX=9606 GN=PCK2 PE=1 SV=4 - [PCKGM_HUMAN]	6.95815e+07	4.40885e+07	6.0911e+07	5.97278e+07	5.46986e+07	4.72988e+07	0.926362	0.633218
Q8N1N4	Keratin, type II cytoskeletal 78 OS=Homo sapiens OX=9606 GN=KRT78 PE=1 SV=2 - [K2C78_HUMAN]	6.61791e+08	9.17988e+08	9.26683e+08	1.4436e+08	1.18196e+08	1.37399e+08	0.15957	0.00129345
Q15269	Periodic tryptophan protein 2 homolog OS=Homo sapiens OX=9606 GN=PWP2 PE=1 SV=2 - [PWP2_HUMAN]	1.46999e+07	2.68874e+06	6.43808e+06	5.8523e+07	8.58313e+07	6.52105e+07	8.79537	0.00229275
Q15061	WD repeat-containing protein 43 OS=Homo sapiens OX=9606 GN=WDR43 PE=1 SV=3 - [WDR43_HUMAN]	7.7674e+06	3.68338e+06	4.3876e+06	3.87717e+07	5.60301e+07	8.0926e+07	11.0951	0.0123203
Q9Y4X5	E3 ubiquitin-protein ligase ARIH1 OS=Homo sapiens OX=9606 GN=ARIH1 PE=1 SV=2 - [ARI1_HUMAN]	1.03269e+07	5.45293e+06	2.83084e+06	3.89657e+07	5.46152e+07	8.46923e+06	5.48343	0.112683
P27816	Microtubule-associated protein 4 OS=Homo sapiens OX=9606 GN=MAP4 PE=1 SV=3 - [MAP4_HUMAN]	6.25683e+06	4.99897e+06	6.97567e+06	3.37457e+07	7.15823e+07	3.65204e+07	7.78042	0.0277769
P18583	Protein SON OS=Homo sapiens OX=9606 GN=SON PE=1 SV=4 - [SON_HUMAN]	1.59417e+07	3.43005e+06	3.36966e+07	7.55852e+07	9.49392e+07	1.17746e+08	5.43205	0.00642652
Q86U38	Nucleolar protein 9 OS=Homo sapiens OX=9606 GN=NOP9 PE=1 SV=1 - [NOP9_HUMAN]	3.41055e+07	3.50449e+07	1.84204e+07	2.27443e+07	4.44999e+07	4.64927e+07	1.2988	0.402476
Q8TC12	Retinol dehydrogenase 11 OS=Homo sapiens OX=9606 GN=RDH11 PE=1 SV=2 - [RDH11_HUMAN]	2.00709e+07	4.19372e+06	4.15775e+07	1.72369e+07	7.48048e+06	7.09957e+06	0.483232	0.373423
Q03701	CCAAT/enhancer-binding protein zeta OS=Homo sapiens OX=9606 GN=CEBPZ PE=1 SV=3 - [CEBPZ_HUMAN]	1.12506e+07	2.17186e+06	4.29016e+06	6.26148e+07	9.70618e+07	7.84081e+07	13.4415	0.00206356
Q9NV31	U3 small nucleolar ribonucleoprotein protein IMP3 OS=Homo sapiens OX=9606 GN=IMP3 PE=1 SV=1 - [IMP3_HUMAN]	5.50572e+06	3.74933e+06	5.23915e+06	3.63796e+06	4.61843e+07	5.2961e+06	3.80279	0.385883
Q96P63	Serpin B12 OS=Homo sapiens OX=9606 GN=SERPINB12 PE=1 SV=1 - [SPB12_HUMAN]	1.05239e+08	7.07193e+07	7.29498e+07	4.16352e+07	4.53155e+07	4.96307e+06	0.369267	0.0372469
Q14527	Helicase-like transcription factor OS=Homo sapiens OX=9606 GN=HLTF PE=1 SV=2 - [HLTF_HUMAN]	5.1227e+07	3.77952e+07	2.91078e+07	5.92085e+07	7.22052e+07	6.20101e+07	1.63738	0.029254
P17480	Nucleolar transcription factor 1 OS=Homo sapiens OX=9606 GN=UBTF PE=1 SV=1 - [UBF1_HUMAN]	7.00765e+06	7.50958e+06	7.06863e+06	5.00165e+07	4.32891e+07	4.18e+07	6.25898	0.000116849
P17676	CCAAT/enhancer-binding protein beta OS=Homo sapiens OX=9606 GN=CEBPB PE=1 SV=2 - [CEBPB_HUMAN]	4.18849e+06	9.66006e+06	6.21016e+06	5.17659e+07	9.33747e+06	5.67257e+07	5.87421	0.0974233
Q9Y617	Phosphoserine aminotransferase OS=Homo sapiens OX=9606 GN=PSAT1 PE=1 SV=2 - [SERC_HUMAN]	4.31521e+06	2.94166e+06	3.28388e+07	1.66048e+07	5.94935e+06	1.36709e+07	0.903464	0.905903
Q14258	E3 ubiquitin/ISG15 ligase TRIM25 OS=Homo sapiens OX=9606 GN=TRIM25 PE=1 SV=2 - [TRI25_HUMAN]	4.33191e+07	6.56926e+06	4.36122e+06	2.96556e+07	2.67104e+07	2.2495e+07	1.45367	0.556561
O95714	E3 ubiquitin-protein ligase HERC2 OS=Homo sapiens OX=9606 GN=HERC2 PE=1 SV=2 - [HERC2_HUMAN]	6.03491e+06	3.39646e+06	4.58694e+06	8.92037e+07	9.1217e+07	9.13689e+07	19.3882	1.25646e-07
Q9H857	5'-nucleotidase domain-containing protein 2 OS=Homo sapiens OX=9606 GN=NT5DC2 PE=1 SV=1 - [NT5D2_HUMAN]	4.11568e+06	2.59859e+06	1.5057e+06	1.85177e+07	1.24955e+07	8.85892e+06	4.85063	0.0224013
Q7L2E3	ATP-dependent RNA helicase DHX30 OS=Homo sapiens OX=9606 GN=DHX30 PE=1 SV=1 - [DHX30_HUMAN]	3.28736e+06	6.27594e+06	7.17825e+06	1.79375e+08	1.86862e+08	1.60045e+08	31.4357	3.02015e-05
P07954	Fumarate hydratase, mitochondrial OS=Homo sapiens OX=9606 GN=FH PE=1 SV=3 - [FUMH_HUMAN]	1.46236e+07	1.23688e+07	4.77609e+06	2.42184e+07	3.73247e+06	1.62091e+07	1.39005	0.568901
P56182	Ribosomal RNA processing protein 1 homolog A OS=Homo sapiens OX=9606 GN=RRP1 PE=1 SV=1 - [RRP1_HUMAN]	1.54382e+07	1.59815e+07	8.94469e+06	1.05981e+07	1.35058e+08	6.23809e+07	5.15396	0.197158
Q66PJ3	ADP-ribosylation factor-like protein 6-interacting protein 4 OS=Homo sapiens OX=9606 GN=ARL6IP4 PE=1 SV=3 - [AR6P4_HUMAN]	1.30469e+07	4.45996e+06	8.39617e+06	1.03584e+07	3.87529e+07	3.36973e+06	2.02606	0.469503
Q92759	General transcription factor IIH subunit 4 OS=Homo sapiens OX=9606 GN=GTF2H4 PE=1 SV=1 - [TF2H4_HUMAN]	6.59435e+06	3.31551e+06	1.00243e+07	1.66475e+07	2.44105e+07	4.53258e+06	2.28706	0.233525
P29084	Transcription initiation factor IIE subunit beta OS=Homo sapiens OX=9606 GN=GTF2E2 PE=1 SV=1 - [T2EB_HUMAN]	9.68419e+06	2.96541e+06	4.69632e+06	8.78981e+06	1.49485e+07	6.21146e+06	1.72662	0.269752
P20618	Proteasome subunit beta type-1 OS=Homo sapiens OX=9606 GN=PSMB1 PE=1 SV=2 - [PSB1_HUMAN]	1.61765e+07	5.24605e+06	2.75796e+07	2.71246e+07	1.07706e+07	8.19436e+06	0.940562	0.917074
P53618	Coatomer subunit beta OS=Homo sapiens OX=9606 GN=COPB1 PE=1 SV=3 - [COPB_HUMAN]	1.29855e+07	3.36669e+06	1.2789e+07	1.62451e+07	7.20966e+06	2.66549e+07	1.71955	0.339651
Q8IWX8	Calcium homeostasis endoplasmic reticulum protein OS=Homo sapiens OX=9606 GN=CHERP PE=1 SV=3 - [CHERP_HUMAN]	1.00464e+08	6.11098e+07	4.896e+07	6.16587e+07	4.31274e+07	4.63318e+07	0.717785	0.297815
Q00796	Sorbitol dehydrogenase OS=Homo sapiens OX=9606 GN=SORD PE=1 SV=4 - [DHSO_HUMAN]	1.11505e+07	4.50252e+06	4.12282e+06	6.51291e+07	8.01516e+06	8.31336e+06	4.11906	0.342873
Q2NL82	Pre-rRNA-processing protein TSR1 homolog OS=Homo sapiens OX=9606 GN=TSR1 PE=1 SV=1 - [TSR1_HUMAN]	9.33876e+06	4.44907e+07	6.17154e+06	7.73072e+07	4.14136e+07	2.11184e+07	2.33062	0.264203
O15037	Protein KHNYN OS=Homo sapiens OX=9606 GN=KHNYN PE=1 SV=3 - [KHNYN_HUMAN]	7.12669e+06	8.97637e+06	4.34583e+06	5.20069e+07	4.38295e+07	3.836e+07	6.56253	0.000824396
O75821	Eukaryotic translation initiation factor 3 subunit G OS=Homo sapiens OX=9606 GN=EIF3G PE=1 SV=2 - [EIF3G_HUMAN]	7.96145e+06	2.84166e+06	1.05329e+07	4.98676e+07	2.65333e+07	4.53783e+07	5.70769	0.0111108
P42765	3-ketoacyl-CoA thiolase, mitochondrial OS=Homo sapiens OX=9606 GN=ACAA2 PE=1 SV=2 - [THIM_HUMAN]	3.84052e+07	2.00597e+07	3.30038e+06	6.10771e+06	7.52729e+06	5.57755e+06	0.311057	0.234958
P61647	Alpha-2,8-sialyltransferase 8F OS=Homo sapiens OX=9606 GN=ST8SIA6 PE=2 SV=1 - [SIA8F_HUMAN]	1.30505e+07	1.40845e+07	1.86862e+08	4.78139e+06	1.75549e+08	1.0503e+07	0.891757	0.928156
P41240	Tyrosine-protein kinase CSK OS=Homo sapiens OX=9606 GN=CSK PE=1 SV=1 - [CSK_HUMAN]	3.41552e+07	8.35959e+06	1.31394e+07	5.35395e+07	6.4028e+07	6.57642e+07	3.29412	0.00840659
Q49A26	Putative oxidoreductase GLYR1 OS=Homo sapiens OX=9606 GN=GLYR1 PE=1 SV=4 - [GLYR1_HUMAN]	1.99101e+07	7.91688e+06	4.05087e+06	5.97154e+07	3.823e+07	3.42761e+07	4.14775	0.0223106
O60884	DnaJ homolog subfamily A member 2 OS=Homo sapiens OX=9606 GN=DNAJA2 PE=1 SV=1 - [DNJA2_HUMAN]	5.90293e+06	1.57877e+07	2.24767e+06	4.13026e+06	4.26399e+07	4.15697e+06	2.12743	0.540326
Q9UDY4	DnaJ homolog subfamily B member 4 OS=Homo sapiens OX=9606 GN=DNAJB4 PE=1 SV=1 - [DNJB4_HUMAN]	5.45131e+07	7.7771e+06	4.0988e+07	8.15284e+07	4.80955e+07	6.09533e+07	1.84528	0.161314
Q9HC52	Chromobox protein homolog 8 OS=Homo sapiens OX=9606 GN=CBX8 PE=1 SV=3 - [CBX8_HUMAN]	8.59758e+06	3.65559e+07	3.01913e+06	6.36475e+07	1.33877e+07	6.57473e+06	1.73563	0.600002
P0CG39	POTE ankyrin domain family member J OS=Homo sapiens OX=9606 GN=POTEJ PE=3 SV=1 - [POTEJ_HUMAN]	1.89244e+09	1.94861e+09	2.04039e+09	4.24878e+09	3.62466e+09	2.57835e+09	1.77708	0.0357326
P04183	Thymidine kinase, cytosolic OS=Homo sapiens OX=9606 GN=TK1 PE=1 SV=2 - [KITH_HUMAN]	2.64787e+06	5.54248e+06	3.4584e+07	3.78503e+07	7.96587e+06	1.98165e+07	1.53439	0.599931
Q9UHP3	Ubiquitin carboxyl-terminal hydrolase 25 OS=Homo sapiens OX=9606 GN=USP25 PE=1 SV=4 - [UBP25_HUMAN]	9.52046e+06	3.39976e+06	4.83103e+06	6.05616e+07	3.98286e+07	5.02737e+07	8.48751	0.00210881
Q12965	Unconventional myosin-Ie OS=Homo sapiens OX=9606 GN=MYO1E PE=1 SV=2 - [MYO1E_HUMAN]	6.69568e+06	2.94554e+06	2.19502e+06	3.41031e+07	2.34486e+07	2.98722e+07	7.38612	0.00176095
P30876	DNA-directed RNA polymerase II subunit RPB2 OS=Homo sapiens OX=9606 GN=POLR2B PE=1 SV=1 - [RPB2_HUMAN]	1.23619e+07	3.2563e+06	3.71106e+06	4.71548e+07	4.18377e+07	4.17421e+07	6.76355	0.000427335
O14732	Inositol monophosphatase 2 OS=Homo sapiens OX=9606 GN=IMPA2 PE=1 SV=1 - [IMPA2_HUMAN]	5.21622e+07	5.27585e+07	4.16208e+07	4.72005e+07	5.81469e+07	4.03174e+07	0.994019	0.965384
O75600	2-amino-3-ketobutyrate coenzyme A ligase, mitochondrial OS=Homo sapiens OX=9606 GN=GCAT PE=1 SV=1 - [KBL_HUMAN]	9.47701e+06	4.7867e+06	1.20891e+07	4.71165e+06	4.15639e+06	3.32373e+07	1.59776	0.62178
Q8N8J0	Putative inactive phosphatidylinositol 4-kinase alpha-like protein P1 OS=Homo sapiens OX=9606 GN=PI4KAP1 PE=5 SV=1 - [PI4P1_HUMAN]	1.41128e+07	3.51015e+06	1.58031e+07	4.10656e+06	7.19219e+06	4.26821e+06	0.465714	0.208636
P00491	Purine nucleoside phosphorylase OS=Homo sapiens OX=9606 GN=PNP PE=1 SV=2 - [PNPH_HUMAN]	5.07674e+07	4.74926e+07	3.74354e+07	4.15746e+07	1.16345e+07	5.05367e+06	0.429364	0.0965646
Q9NQ55	Suppressor of SWI4 1 homolog OS=Homo sapiens OX=9606 GN=PPAN PE=2 SV=1 - [SSF1_HUMAN]	9.85688e+06	3.56112e+06	6.07393e+06	5.76893e+07	5.87547e+07	5.71718e+07	8.90705	1.08486e-05
Q6PJT7	Zinc finger CCCH domain-containing protein 14 OS=Homo sapiens OX=9606 GN=ZC3H14 PE=1 SV=1 - [ZC3HE_HUMAN]	2.68348e+07	4.77908e+06	2.5862e+06	4.56845e+07	5.18198e+07	4.07219e+07	4.04169	0.0144139
P14625	Endoplasmin OS=Homo sapiens OX=9606 GN=HSP90B1 PE=1 SV=1 - [ENPL_HUMAN]	2.77671e+08	2.47285e+08	2.36817e+08	4.13497e+08	4.70168e+08	5.08862e+08	1.82801	0.00226002
Q9UM54	Unconventional myosin-VI OS=Homo sapiens OX=9606 GN=MYO6 PE=1 SV=4 - [MYO6_HUMAN]	8.7679e+06	4.74541e+06	1.00188e+07	4.92835e+07	4.81689e+07	4.44969e+07	6.03216	5.17663e-05
Q9P2J5	Leucine--tRNA ligase, cytoplasmic OS=Homo sapiens OX=9606 GN=LARS1 PE=1 SV=2 - [SYLC_HUMAN]	3.8659e+07	5.62063e+06	3.27911e+07	1.88244e+07	5.12909e+07	4.45709e+07	1.48807	0.426926
Q15386	Ubiquitin-protein ligase E3C OS=Homo sapiens OX=9606 GN=UBE3C PE=1 SV=3 - [UBE3C_HUMAN]	2.07111e+07	5.50572e+06	1.64402e+06	2.54026e+08	1.95586e+07	1.62857e+07	10.4042	0.330528
Q9BQP7	Mitochondrial genome maintenance exonuclease 1 OS=Homo sapiens OX=9606 GN=MGME1 PE=1 SV=1 - [MGME1_HUMAN]	2.26154e+07	5.93617e+06	5.89639e+06	6.18868e+06	4.18936e+06	7.1892e+06	0.509965	0.37458
Q9UL25	Ras-related protein Rab-21 OS=Homo sapiens OX=9606 GN=RAB21 PE=1 SV=3 - [RAB21_HUMAN]	4.28481e+06	5.38494e+06	3.22083e+06	7.3683e+06	8.31855e+06	1.12834e+07	2.09224	0.0245092
Q14160	Protein scribble homolog OS=Homo sapiens OX=9606 GN=SCRIB PE=1 SV=5 - [SCRIB_HUMAN]	8.50866e+06	8.54945e+06	3.18464e+06	4.91198e+07	7.14089e+07	2.81611e+07	7.34533	0.0274141
P62861	FAU ubiquitin-like and ribosomal protein S30 OS=Homo sapiens OX=9606 GN=FAU PE=1 SV=2 - [RS30_HUMAN]	4.99274e+06	1.49641e+07	5.15521e+06	3.88531e+06	9.25994e+07	4.30825e+07	5.55779	0.214418
P61077	Ubiquitin-conjugating enzyme E2 D3 OS=Homo sapiens OX=9606 GN=UBE2D3 PE=1 SV=1 - [UB2D3_HUMAN]	5.97497e+06	5.99654e+06	1.06084e+07	6.89109e+06	6.32867e+07	6.85488e+06	3.41156	0.39052
O76003	Glutaredoxin-3 OS=Homo sapiens OX=9606 GN=GLRX3 PE=1 SV=2 - [GLRX3_HUMAN]	1.35435e+07	3.86303e+06	4.91445e+06	4.61171e+07	1.09642e+07	1.17178e+07	3.08226	0.266001
P61163	Alpha-centractin OS=Homo sapiens OX=9606 GN=ACTR1A PE=1 SV=1 - [ACTZ_HUMAN]	1.36056e+07	3.16406e+08	3.49825e+06	6.72706e+08	7.57808e+06	8.66099e+06	2.06574	0.652878
Q9H9Y2	Ribosome production factor 1 OS=Homo sapiens OX=9606 GN=RPF1 PE=1 SV=2 - [RPF1_HUMAN]	8.76243e+06	2.90499e+06	8.58091e+06	2.21822e+07	8.44754e+06	1.53146e+07	2.26904	0.123841
Q9NV06	DDB1- and CUL4-associated factor 13 OS=Homo sapiens OX=9606 GN=DCAF13 PE=1 SV=2 - [DCA13_HUMAN]	4.1887e+07	4.6529e+06	5.09094e+06	6.59743e+07	6.04065e+07	2.6308e+07	2.95732	0.12643
Q96QK1	Vacuolar protein sorting-associated protein 35 OS=Homo sapiens OX=9606 GN=VPS35 PE=1 SV=2 - [VPS35_HUMAN]	4.79291e+07	1.72728e+07	1.62158e+07	3.17026e+07	7.1632e+07	5.0785e+07	1.89295	0.193607
Q9H7Z3	Nuclear exosome regulator NRDE2 OS=Homo sapiens OX=9606 GN=NRDE2 PE=1 SV=3 - [NRDE2_HUMAN]	1.10955e+08	6.40369e+07	6.01433e+07	9.32758e+07	1.26688e+08	9.43161e+07	1.33659	0.250926
P18074	General transcription and DNA repair factor IIH helicase subunit XPD OS=Homo sapiens OX=9606 GN=ERCC2 PE=1 SV=1 - [ERCC2_HUMAN]	1.01319e+07	2.94717e+06	7.89879e+06	4.73874e+07	1.4799e+07	7.4515e+06	3.31959	0.262719
P01876	Immunoglobulin heavy constant alpha 1 OS=Homo sapiens OX=9606 GN=IGHA1 PE=1 SV=2 - [IGHA1_HUMAN]	4.72562e+07	4.48663e+06	2.30298e+07	6.03951e+06	1.83046e+07	1.71131e+07	0.554443	0.440591
Q9UHA3	Probable ribosome biogenesis protein RLP24 OS=Homo sapiens OX=9606 GN=RSL24D1 PE=1 SV=1 - [RLP24_HUMAN]	8.05303e+06	8.44754e+06	8.81299e+06	3.53897e+06	9.32177e+07	1.14296e+08	8.33753	0.142328
Q8IYW5	E3 ubiquitin-protein ligase RNF168 OS=Homo sapiens OX=9606 GN=RNF168 PE=1 SV=1 - [RN168_HUMAN]	1.1118e+07	8.52282e+06	5.56326e+06	2.78698e+07	9.86508e+06	2.49183e+07	2.48583	0.0977957
Q16181	Septin-7 OS=Homo sapiens OX=9606 GN=SEPTIN7 PE=1 SV=2 - [SEPT7_HUMAN]	5.16666e+06	2.26358e+07	2.54771e+07	3.85012e+07	4.07444e+07	4.53123e+07	2.33782	0.0234118
Q9UNX4	WD repeat-containing protein 3 OS=Homo sapiens OX=9606 GN=WDR3 PE=1 SV=1 - [WDR3_HUMAN]	1.02477e+07	6.29555e+06	3.27191e+06	6.82204e+07	4.69395e+07	4.41466e+07	8.03962	0.0040999
Q96HA8	Protein N-terminal glutamine amidohydrolase OS=Homo sapiens OX=9606 GN=NTAQ1 PE=1 SV=2 - [NTAQ1_HUMAN]	1.299e+07	3.4288e+07	9.88699e+06	8.55834e+06	9.73872e+06	1.15349e+07	0.521857	0.30319
Q5T440	Putative transferase CAF17, mitochondrial OS=Homo sapiens OX=9606 GN=IBA57 PE=1 SV=1 - [CAF17_HUMAN]	5.14022e+06	3.66073e+06	5.50725e+06	1.2558e+07	7.18273e+06	9.39069e+06	2.03599	0.0407965
Q76FK4	Nucleolar protein 8 OS=Homo sapiens OX=9606 GN=NOL8 PE=1 SV=1 - [NOL8_HUMAN]	6.3852e+06	1.67377e+07	6.15958e+06	1.65669e+07	2.24669e+07	1.9866e+07	2.01144	0.0638709
P10155	RNA-binding protein RO60 OS=Homo sapiens OX=9606 GN=RO60 PE=1 SV=2 - [RO60_HUMAN]	6.76285e+06	2.15716e+06	2.72193e+06	2.34979e+06	1.37698e+07	2.39231e+07	3.43952	0.213047
P30084	Enoyl-CoA hydratase, mitochondrial OS=Homo sapiens OX=9606 GN=ECHS1 PE=1 SV=4 - [ECHM_HUMAN]	8.51574e+06	4.02372e+06	8.6718e+06	9.69206e+07	9.08322e+07	7.3051e+07	12.2955	0.000400989
P52789	Hexokinase-2 OS=Homo sapiens OX=9606 GN=HK2 PE=1 SV=2 - [HXK2_HUMAN]	7.00183e+06	7.20317e+06	3.67115e+06	4.6655e+06	3.74017e+07	3.91253e+07	4.54195	0.134376
Q5SRE5	Nucleoporin NUP188 OS=Homo sapiens OX=9606 GN=NUP188 PE=1 SV=1 - [NU188_HUMAN]	4.6397e+06	5.38308e+06	4.56189e+06	2.25746e+07	5.23759e+07	2.51438e+07	6.86299	0.040403
Q9H9B4	Sideroflexin-1 OS=Homo sapiens OX=9606 GN=SFXN1 PE=1 SV=4 - [SFXN1_HUMAN]	3.64673e+07	4.39147e+07	3.27071e+07	2.7104e+07	1.57998e+07	4.776e+07	0.801702	0.49303
Q9UNF1	Melanoma-associated antigen D2 OS=Homo sapiens OX=9606 GN=MAGED2 PE=1 SV=2 - [MAGD2_HUMAN]	1.55219e+07	7.92292e+06	4.06409e+06	1.04965e+07	2.59225e+07	1.50859e+07	1.8723	0.231721
Q9BQ69	ADP-ribose glycohydrolase MACROD1 OS=Homo sapiens OX=9606 GN=MACROD1 PE=1 SV=2 - [MACD1_HUMAN]	5.2873e+06	1.02222e+07	3.7673e+06	5.21162e+06	1.68857e+07	9.91444e+06	1.66064	0.338785
Q9NUQ8	ATP-binding cassette sub-family F member 3 OS=Homo sapiens OX=9606 GN=ABCF3 PE=1 SV=2 - [ABCF3_HUMAN]	3.42737e+07	3.22328e+06	2.68032e+07	9.44142e+07	4.83194e+07	4.83094e+07	2.97111	0.0786672
Q9NTI5	Sister chromatid cohesion protein PDS5 homolog B OS=Homo sapiens OX=9606 GN=PDS5B PE=1 SV=1 - [PDS5B_HUMAN]	7.31639e+06	6.99601e+06	9.61663e+06	1.61385e+07	4.33041e+07	1.61373e+07	3.1585	0.131228
Q5T2D3	OTU domain-containing protein 3 OS=Homo sapiens OX=9606 GN=OTUD3 PE=1 SV=1 - [OTUD3_HUMAN]	4.29254e+06	7.15688e+06	1.28512e+07	3.88235e+06	5.92589e+06	7.51478e+06	0.712863	0.441645
Q13435	Splicing factor 3B subunit 2 OS=Homo sapiens OX=9606 GN=SF3B2 PE=1 SV=2 - [SF3B2_HUMAN]	6.8014e+06	7.19718e+06	5.54017e+06	5.69029e+07	5.45056e+07	4.19771e+07	7.85033	0.000662025
Q8WYP5	Protein ELYS OS=Homo sapiens OX=9606 GN=AHCTF1 PE=1 SV=3 - [ELYS_HUMAN]	6.73012e+06	3.15258e+06	2.96603e+06	7.79691e+07	7.24208e+07	7.41169e+07	17.4731	4.23686e-06
Q9NW81	Distal membrane-arm assembly complex protein 2 OS=Homo sapiens OX=9606 GN=DMAC2 PE=1 SV=3 - [DMAC2_HUMAN]	1.06224e+07	4.46615e+06	6.85298e+06	8.19039e+06	8.76486e+06	7.24573e+06	1.10298	0.704158
Q9BXY0	Protein MAK16 homolog OS=Homo sapiens OX=9606 GN=MAK16 PE=1 SV=2 - [MAK16_HUMAN]	7.55395e+06	4.99932e+06	1.36236e+07	8.69889e+06	1.15653e+07	4.53563e+07	2.50682	0.336373
Q15392	Delta(24)-sterol reductase OS=Homo sapiens OX=9606 GN=DHCR24 PE=1 SV=2 - [DHC24_HUMAN]	8.2124e+07	9.50972e+07	9.27279e+07	7.03087e+07	6.36298e+07	1.83656e+07	0.564196	0.0798332
O95071	E3 ubiquitin-protein ligase UBR5 OS=Homo sapiens OX=9606 GN=UBR5 PE=1 SV=2 - [UBR5_HUMAN]	8.06364e+06	1.25981e+07	2.90177e+06	6.16416e+07	4.68063e+07	5.51172e+07	6.94147	0.000807302
P55209	Nucleosome assembly protein 1-like 1 OS=Homo sapiens OX=9606 GN=NAP1L1 PE=1 SV=1 - [NP1L1_HUMAN]	6.70776e+06	1.32418e+07	5.37041e+06	3.60027e+07	3.57168e+07	5.30555e+07	4.92792	0.00598992
P25789	Proteasome subunit alpha type-4 OS=Homo sapiens OX=9606 GN=PSMA4 PE=1 SV=1 - [PSA4_HUMAN]	8.29551e+06	4.94408e+07	2.0756e+06	8.2268e+06	5.50381e+06	1.88022e+07	0.543919	0.586727
Q92973	Transportin-1 OS=Homo sapiens OX=9606 GN=TNPO1 PE=1 SV=2 - [TNPO1_HUMAN]	4.18182e+06	2.68837e+06	3.63746e+06	1.09306e+08	1.12605e+08	9.36321e+07	30.0299	6.51399e-05
Q99598	Translin-associated protein X OS=Homo sapiens OX=9606 GN=TSNAX PE=1 SV=1 - [TSNAX_HUMAN]	5.79108e+06	9.592e+06	5.17024e+06	3.1282e+06	9.74209e+06	3.93382e+06	0.817586	0.643417
P82930	28S ribosomal protein S34, mitochondrial OS=Homo sapiens OX=9606 GN=MRPS34 PE=1 SV=2 - [RT34_HUMAN]	4.04097e+07	5.62793e+07	3.47474e+07	3.95973e+07	3.51787e+07	2.23985e+07	0.739328	0.23865
P62495	Eukaryotic peptide chain release factor subunit 1 OS=Homo sapiens OX=9606 GN=ETF1 PE=1 SV=3 - [ERF1_HUMAN]	5.00244e+06	5.83783e+06	6.70916e+06	5.14298e+07	5.40541e+07	5.39904e+07	9.08715	1.1703e-06
O75521	Enoyl-CoA delta isomerase 2 OS=Homo sapiens OX=9606 GN=ECI2 PE=1 SV=4 - [ECI2_HUMAN]	1.73954e+07	4.88694e+06	3.46302e+06	1.95017e+07	9.46191e+06	1.25536e+07	1.61261	0.379742
Q8N3E9	1-phosphatidylinositol 4,5-bisphosphate phosphodiesterase delta-3 OS=Homo sapiens OX=9606 GN=PLCD3 PE=1 SV=3 - [PLCD3_HUMAN]	2.81299e+07	1.21453e+07	1.01734e+07	2.29327e+07	1.81983e+07	2.82021e+07	1.37433	0.379498
Q14197	Peptidyl-tRNA hydrolase ICT1, mitochondrial OS=Homo sapiens OX=9606 GN=MRPL58 PE=1 SV=1 - [ICT1_HUMAN]	7.39527e+07	7.73355e+06	5.44451e+07	4.37052e+07	2.51159e+07	1.6047e+07	0.623428	0.466703
Q9NZ52	ADP-ribosylation factor-binding protein GGA3 OS=Homo sapiens OX=9606 GN=GGA3 PE=1 SV=1 - [GGA3_HUMAN]	1.22536e+07	5.94399e+06	6.97518e+06	4.55106e+07	7.27075e+07	5.33543e+07	6.8158	0.00420917
O75534	Cold shock domain-containing protein E1 OS=Homo sapiens OX=9606 GN=CSDE1 PE=1 SV=2 - [CSDE1_HUMAN]	6.99261e+06	2.72533e+06	3.2917e+06	5.11418e+07	3.43165e+07	3.11667e+07	8.96451	0.00552481
Q96P11	28S rRNA (cytosine-C(5))-methyltransferase OS=Homo sapiens OX=9606 GN=NSUN5 PE=1 SV=2 - [NSUN5_HUMAN]	6.6493e+07	4.61747e+07	9.04238e+07	7.29144e+07	6.57551e+07	7.44774e+07	1.04951	0.810207
Q14146	Unhealthy ribosome biogenesis protein 2 homolog OS=Homo sapiens OX=9606 GN=URB2 PE=1 SV=2 - [URB2_HUMAN]	6.71474e+06	7.73784e+06	5.85688e+06	8.35247e+07	8.70837e+07	7.55171e+07	12.1188	2.6513e-05
Q5BKZ1	DBIRD complex subunit ZNF326 OS=Homo sapiens OX=9606 GN=ZNF326 PE=1 SV=2 - [ZN326_HUMAN]	8.52814e+06	8.3735e+06	4.21821e+06	1.27781e+08	1.05473e+08	1.57404e+08	18.4972	0.00123126
P07305	Histone H1.0 OS=Homo sapiens OX=9606 GN=H1-0 PE=1 SV=3 - [H10_HUMAN]	8.90139e+06	6.85916e+06	7.71588e+06	9.37768e+06	2.57863e+07	7.54662e+06	1.8193	0.333118
P60981	Destrin OS=Homo sapiens OX=9606 GN=DSTN PE=1 SV=3 - [DEST_HUMAN]	2.48441e+07	5.88006e+06	5.64327e+06	8.39717e+07	9.38484e+06	1.08333e+08	5.54589	0.14446
P78316	Nucleolar protein 14 OS=Homo sapiens OX=9606 GN=NOP14 PE=1 SV=3 - [NOP14_HUMAN]	1.24289e+07	5.24641e+06	3.35574e+06	1.92743e+08	4.81055e+07	5.57126e+07	14.1011	0.122828
Q8NFF5	FAD synthase OS=Homo sapiens OX=9606 GN=FLAD1 PE=1 SV=1 - [FAD1_HUMAN]	8.43292e+06	3.83129e+06	6.84681e+06	1.96755e+07	3.83095e+07	4.25661e+07	5.26142	0.0192219
O75663	TIP41-like protein OS=Homo sapiens OX=9606 GN=TIPRL PE=1 SV=2 - [TIPRL_HUMAN]	8.72244e+06	5.25624e+06	3.06446e+06	6.65451e+06	4.88254e+06	3.47715e+07	2.71713	0.376759
O15042	U2 snRNP-associated SURP motif-containing protein OS=Homo sapiens OX=9606 GN=U2SURP PE=1 SV=2 - [SR140_HUMAN]	7.37582e+07	5.11489e+07	5.84824e+07	9.08511e+07	1.03668e+08	6.06414e+07	1.39136	0.171707
Q8NCW5	NAD(P)H-hydrate epimerase OS=Homo sapiens OX=9606 GN=NAXE PE=1 SV=2 - [NNRE_HUMAN]	1.12928e+07	9.28004e+06	5.45936e+06	1.27669e+07	1.43684e+07	5.79831e+06	1.26511	0.50415
Q9Y679	Lipid droplet-regulating VLDL assembly factor AUP1 OS=Homo sapiens OX=9606 GN=AUP1 PE=1 SV=2 - [AUP1_HUMAN]	8.75029e+06	2.65983e+06	3.44793e+06	7.81492e+06	1.17797e+07	4.72333e+07	4.49776	0.243525
Q86X55	Histone-arginine methyltransferase CARM1 OS=Homo sapiens OX=9606 GN=CARM1 PE=1 SV=3 - [CARM1_HUMAN]	1.2578e+07	8.65799e+06	5.22536e+06	1.10734e+07	8.88414e+06	5.37179e+07	2.78427	0.346014
Q15631	Translin OS=Homo sapiens OX=9606 GN=TSN PE=1 SV=1 - [TSN_HUMAN]	8.12761e+06	9.43114e+06	6.27507e+06	2.00042e+07	1.10742e+07	2.81611e+07	2.48552	0.0783709
Q96K76	Ubiquitin carboxyl-terminal hydrolase 47 OS=Homo sapiens OX=9606 GN=USP47 PE=1 SV=3 - [UBP47_HUMAN]	6.5352e+06	5.38943e+06	3.86785e+06	2.45123e+07	3.87341e+07	4.19713e+07	6.66252	0.00532055
Q9Y6I4	Ubiquitin carboxyl-terminal hydrolase 3 OS=Homo sapiens OX=9606 GN=USP3 PE=1 SV=2 - [UBP3_HUMAN]	2.18526e+07	5.93658e+06	8.12705e+06	6.16043e+06	2.89789e+07	7.34943e+06	1.183	0.818333
P48729	Casein kinase I isoform alpha OS=Homo sapiens OX=9606 GN=CSNK1A1 PE=1 SV=2 - [KC1A_HUMAN]	1.19202e+07	5.08424e+06	9.24665e+06	2.25559e+07	5.16129e+06	1.0884e+07	1.47046	0.495127
P36404	ADP-ribosylation factor-like protein 2 OS=Homo sapiens OX=9606 GN=ARL2 PE=1 SV=4 - [ARL2_HUMAN]	6.53112e+06	9.12125e+06	8.87244e+06	1.13069e+07	6.02947e+06	2.63573e+07	1.78161	0.357193
P61619	Protein transport protein Sec61 subunit alpha isoform 1 OS=Homo sapiens OX=9606 GN=SEC61A1 PE=1 SV=2 - [S61A1_HUMAN]	6.33802e+06	4.96056e+07	2.86255e+07	3.36126e+07	6.63332e+06	3.43951e+07	0.882604	0.841078
P43304	Glycerol-3-phosphate dehydrogenase, mitochondrial OS=Homo sapiens OX=9606 GN=GPD2 PE=1 SV=3 - [GPDM_HUMAN]	1.90066e+07	2.20672e+07	1.21252e+07	4.28295e+07	4.42109e+07	4.02867e+07	2.39341	0.00143775
Q14192	Four and a half LIM domains protein 2 OS=Homo sapiens OX=9606 GN=FHL2 PE=1 SV=3 - [FHL2_HUMAN]	7.56548e+06	6.04915e+06	5.10578e+06	1.05239e+08	9.63913e+07	1.17428e+08	17.0434	8.28123e-05
Q5T6F2	Ubiquitin-associated protein 2 OS=Homo sapiens OX=9606 GN=UBAP2 PE=1 SV=1 - [UBAP2_HUMAN]	9.26847e+06	4.85924e+06	2.05813e+06	3.12012e+07	3.20029e+07	2.31002e+07	5.33209	0.0027097
Q9BW92	Threonine--tRNA ligase, mitochondrial OS=Homo sapiens OX=9606 GN=TARS2 PE=1 SV=1 - [SYTM_HUMAN]	9.66273e+06	4.7431e+06	3.35132e+06	3.79527e+07	1.00077e+07	7.36013e+06	3.11539	0.277581
Q9UNQ2	Probable dimethyladenosine transferase OS=Homo sapiens OX=9606 GN=DIMT1 PE=1 SV=1 - [DIM1_HUMAN]	9.92407e+06	3.53481e+06	4.87746e+06	2.16731e+07	6.67252e+06	1.28574e+07	2.24707	0.185094
Q96D46	60S ribosomal export protein NMD3 OS=Homo sapiens OX=9606 GN=NMD3 PE=1 SV=1 - [NMD3_HUMAN]	2.15383e+07	4.05902e+06	1.33044e+07	2.13185e+07	1.11892e+07	6.25726e+06	0.996483	0.99491
Q68CQ4	U3 small nucleolar RNA-associated protein 25 homolog OS=Homo sapiens OX=9606 GN=UTP25 PE=1 SV=2 - [UTP25_HUMAN]	1.24583e+07	1.16627e+07	2.65688e+06	2.29788e+07	9.56942e+06	2.09827e+07	1.99908	0.163213
Q96ME7	Zinc finger protein 512 OS=Homo sapiens OX=9606 GN=ZNF512 PE=1 SV=2 - [ZN512_HUMAN]	7.4753e+06	9.26012e+06	3.63595e+06	2.29025e+07	3.66403e+06	6.4694e+06	1.62168	0.5349
Q9Y5Z4	Heme-binding protein 2 OS=Homo sapiens OX=9606 GN=HEBP2 PE=1 SV=1 - [HEBP2_HUMAN]	6.15616e+06	5.50038e+06	8.23022e+06	6.42605e+06	6.30297e+06	4.69274e+06	0.876048	0.455039
O00629	Importin subunit alpha-3 OS=Homo sapiens OX=9606 GN=KPNA4 PE=1 SV=1 - [IMA3_HUMAN]	6.69568e+06	2.22561e+07	4.06944e+06	5.55006e+07	3.28206e+07	6.62997e+07	4.68247	0.023557
Q27J81	Inverted formin-2 OS=Homo sapiens OX=9606 GN=INF2 PE=1 SV=2 - [INF2_HUMAN]	8.48569e+06	8.08771e+06	4.37606e+06	2.40045e+07	1.49703e+07	2.04543e+07	2.83678	0.0119744
Q9NRW3	DNA dC->dU-editing enzyme APOBEC-3C OS=Homo sapiens OX=9606 GN=APOBEC3C PE=1 SV=2 - [ABC3C_HUMAN]	5.2446e+06	5.62492e+06	4.11226e+06	7.52312e+06	1.10573e+07	2.30202e+07	2.77675	0.132748
Q8IYU4	Ubiquilin-like protein OS=Homo sapiens OX=9606 GN=UBQLNL PE=1 SV=3 - [UBQLN_HUMAN]	2.13066e+07	3.21815e+06	1.09089e+07	1.03047e+07	1.04074e+07	8.03129e+06	0.811187	0.695447
P12277	Creatine kinase B-type OS=Homo sapiens OX=9606 GN=CKB PE=1 SV=1 - [KCRB_HUMAN]	1.0557e+07	2.25387e+07	3.66447e+07	5.77744e+06	4.17285e+06	6.48781e+06	0.235704	0.0787712
P08651	Nuclear factor 1 C-type OS=Homo sapiens OX=9606 GN=NFIC PE=1 SV=2 - [NFIC_HUMAN]	9.76305e+06	4.6397e+06	4.83673e+06	1.17211e+07	8.87244e+06	5.46114e+07	3.90889	0.278473
Q9NYR9	NF-kappa-B inhibitor-interacting Ras-like protein 2 OS=Homo sapiens OX=9606 GN=NKIRAS2 PE=1 SV=1 - [KBRS2_HUMAN]	5.15047e+07	3.09262e+06	7.89113e+06	5.36669e+06	7.35503e+06	6.16342e+06	0.302218	0.399016
P35637	RNA-binding protein FUS OS=Homo sapiens OX=9606 GN=FUS PE=1 SV=1 - [FUS_HUMAN]	4.65548e+06	1.15253e+07	3.73661e+06	7.04404e+07	6.57642e+07	8.63205e+07	11.1724	0.00054139
Q9BT22	Chitobiosyldiphosphodolichol beta-mannosyltransferase OS=Homo sapiens OX=9606 GN=ALG1 PE=1 SV=2 - [ALG1_HUMAN]	2.25793e+07	1.05629e+07	3.66327e+06	4.07255e+06	7.73463e+06	8.16884e+06	0.542746	0.379043
Q9BQ61	Telomerase RNA component interacting RNase OS=Homo sapiens OX=9606 GN=TRIR PE=1 SV=1 - [TRIR_HUMAN]	2.99973e+06	1.63762e+07	1.4649e+07	6.59116e+06	1.02577e+07	6.40959e+06	0.683569	0.458938
Q8NFW8	N-acylneuraminate cytidylyltransferase OS=Homo sapiens OX=9606 GN=CMAS PE=1 SV=2 - [NEUA_HUMAN]	3.99012e+06	6.98583e+06	4.00342e+06	2.37315e+07	3.92313e+07	2.63756e+07	5.96409	0.00713514
O76013	Keratin, type I cuticular Ha6 OS=Homo sapiens OX=9606 GN=KRT36 PE=1 SV=1 - [KRT36_HUMAN]	5.64138e+09	2.26432e+08	1.65689e+08	7.87201e+06	5.19323e+06	1.01859e+08	0.0190477	0.338274
Q8IXT5	RNA-binding protein 12B OS=Homo sapiens OX=9606 GN=RBM12B PE=1 SV=2 - [RB12B_HUMAN]	1.68553e+07	4.69404e+06	2.49775e+06	6.16941e+06	7.4417e+06	3.01071e+07	1.81802	0.505147
O15145	Actin-related protein 2/3 complex subunit 3 OS=Homo sapiens OX=9606 GN=ARPC3 PE=1 SV=3 - [ARPC3_HUMAN]	6.19457e+07	5.15879e+06	6.18782e+06	4.638e+07	9.29485e+06	7.16469e+07	1.73718	0.527715
P09543	2',3'-cyclic-nucleotide 3'-phosphodiesterase OS=Homo sapiens OX=9606 GN=CNP PE=1 SV=2 - [CN37_HUMAN]	5.9065e+07	5.67257e+07	5.06409e+07	1.02128e+08	1.07066e+07	7.40964e+07	1.12317	0.81374
P40937	Replication factor C subunit 5 OS=Homo sapiens OX=9606 GN=RFC5 PE=1 SV=1 - [RFC5_HUMAN]	5.13738e+06	6.63654e+06	2.97668e+07	2.77023e+07	3.34066e+06	4.696e+06	0.860335	0.87159
Q9BSF4	Mitochondrial import inner membrane translocase subunit Tim29 OS=Homo sapiens OX=9606 GN=TIMM29 PE=1 SV=2 - [TIM29_HUMAN]	7.87801e+06	5.21053e+06	9.24217e+06	4.6307e+06	3.91606e+07	2.93875e+07	3.27705	0.176644
Q96G28	Cilia- and flagella-associated protein 36 OS=Homo sapiens OX=9606 GN=CFAP36 PE=1 SV=2 - [CFA36_HUMAN]	1.20539e+07	1.77822e+06	1.06985e+07	2.87767e+07	9.69091e+06	1.0257e+07	1.98628	0.316442
P52888	Thimet oligopeptidase OS=Homo sapiens OX=9606 GN=THOP1 PE=1 SV=2 - [THOP1_HUMAN]	1.19268e+07	5.83297e+06	3.70053e+06	2.86891e+07	2.54013e+07	3.31867e+07	4.06691	0.00278477
O43148	mRNA cap guanine-N7 methyltransferase OS=Homo sapiens OX=9606 GN=RNMT PE=1 SV=1 - [MCES_HUMAN]	5.05778e+07	4.53469e+07	3.64724e+07	9.93833e+07	7.88879e+07	8.43977e+07	1.98395	0.0041678
Q9ULT8	E3 ubiquitin-protein ligase HECTD1 OS=Homo sapiens OX=9606 GN=HECTD1 PE=1 SV=4 - [HECD1_HUMAN]	4.66388e+06	5.70818e+06	5.46163e+06	4.95438e+07	6.13772e+07	8.04618e+07	12.0871	0.00290158
P54252	Ataxin-3 OS=Homo sapiens OX=9606 GN=ATXN3 PE=1 SV=5 - [ATX3_HUMAN]	6.35958e+06	8.00128e+06	6.27246e+06	1.41497e+08	1.4017e+08	9.57852e+07	18.2933	0.0013803
P63010	AP-2 complex subunit beta OS=Homo sapiens OX=9606 GN=AP2B1 PE=1 SV=1 - [AP2B1_HUMAN]	6.44433e+06	5.48857e+06	6.26334e+06	1.86374e+07	2.55408e+07	2.47959e+07	3.79057	0.00155434
Q9BSH4	Translational activator of cytochrome c oxidase 1 OS=Homo sapiens OX=9606 GN=TACO1 PE=1 SV=1 - [TACO1_HUMAN]	4.30565e+06	8.28444e+07	5.15154e+07	1.00227e+08	5.54402e+06	8.91233e+07	1.4055	0.644335
P25490	Transcriptional repressor protein YY1 OS=Homo sapiens OX=9606 GN=YY1 PE=1 SV=2 - [TYY1_HUMAN]	6.44287e+07	3.3971e+07	2.82687e+07	7.25967e+07	5.17552e+07	5.77813e+07	1.43787	0.222694
Q8TDD1	ATP-dependent RNA helicase DDX54 OS=Homo sapiens OX=9606 GN=DDX54 PE=1 SV=2 - [DDX54_HUMAN]	8.53228e+06	8.45398e+06	4.25964e+06	5.21405e+07	1.53826e+07	3.20873e+07	4.68845	0.0714451
Q8IZL8	Proline-, glutamic acid- and leucine-rich protein 1 OS=Homo sapiens OX=9606 GN=PELP1 PE=1 SV=2 - [PELP1_HUMAN]	1.08787e+07	2.56211e+06	2.61716e+07	1.07265e+08	1.04926e+08	8.89814e+07	7.60298	0.000632455
O60287	Nucleolar pre-ribosomal-associated protein 1 OS=Homo sapiens OX=9606 GN=URB1 PE=1 SV=4 - [NPA1P_HUMAN]	5.18244e+06	6.96842e+06	1.02797e+07	5.95459e+07	3.66726e+07	4.44198e+07	6.26994	0.0046029
Q92878	DNA repair protein RAD50 OS=Homo sapiens OX=9606 GN=RAD50 PE=1 SV=1 - [RAD50_HUMAN]	7.96461e+07	5.43632e+06	4.34402e+06	5.2173e+07	5.89873e+07	5.02423e+07	1.80486	0.392613
Q9NSE4	Isoleucine--tRNA ligase, mitochondrial OS=Homo sapiens OX=9606 GN=IARS2 PE=1 SV=2 - [SYIM_HUMAN]	3.64269e+07	3.08037e+07	3.81717e+07	4.46235e+07	5.10533e+07	2.12993e+07	1.10981	0.699801
Q53GA4	Pleckstrin homology-like domain family A member 2 OS=Homo sapiens OX=9606 GN=PHLDA2 PE=1 SV=2 - [PHLA2_HUMAN]	3.66396e+07	8.80932e+06	7.20317e+06	5.42014e+06	9.46453e+06	5.48439e+06	0.386862	0.327219
Q9Y2Y9	Krueppel-like factor 13 OS=Homo sapiens OX=9606 GN=KLF13 PE=1 SV=1 - [KLF13_HUMAN]	3.50012e+07	2.84298e+07	4.37961e+07	4.51783e+06	6.4421e+06	7.5393e+06	0.172524	0.00286166
P26038	Moesin OS=Homo sapiens OX=9606 GN=MSN PE=1 SV=3 - [MOES_HUMAN]	6.98666e+07	1.12265e+07	2.26514e+07	1.22993e+08	7.54282e+07	7.04795e+07	2.59195	0.0883252
P50336	Protoporphyrinogen oxidase OS=Homo sapiens OX=9606 GN=PPOX PE=1 SV=1 - [PPOX_HUMAN]	6.32573e+06	2.07384e+07	1.23782e+07	8.09051e+06	6.92604e+06	7.48204e+06	0.570418	0.249126
Q2TAY7	WD40 repeat-containing protein SMU1 OS=Homo sapiens OX=9606 GN=SMU1 PE=1 SV=2 - [SMU1_HUMAN]	4.55841e+06	3.40872e+06	1.89085e+06	7.11569e+07	3.4307e+07	4.80356e+07	15.5711	0.0113196
Q9NVI7	ATPase family AAA domain-containing protein 3A OS=Homo sapiens OX=9606 GN=ATAD3A PE=1 SV=2 - [ATD3A_HUMAN]	3.3744e+06	3.36663e+07	2.8572e+07	4.12188e+07	5.64707e+07	5.50561e+07	2.32799	0.0512557
P48507	Glutamate--cysteine ligase regulatory subunit OS=Homo sapiens OX=9606 GN=GCLM PE=1 SV=1 - [GSH0_HUMAN]	8.3857e+06	1.39736e+07	2.49758e+06	9.87329e+06	2.41446e+07	5.48515e+06	1.58922	0.496542
Q969X6	U3 small nucleolar RNA-associated protein 4 homolog OS=Homo sapiens OX=9606 GN=UTP4 PE=1 SV=1 - [UTP4_HUMAN]	6.82359e+06	8.1972e+06	5.37413e+06	4.91572e+07	4.02448e+07	4.93758e+07	6.80453	0.000223988
P09936	Ubiquitin carboxyl-terminal hydrolase isozyme L1 OS=Homo sapiens OX=9606 GN=UCHL1 PE=1 SV=2 - [UCHL1_HUMAN]	6.9246e+06	1.26752e+07	4.45842e+06	1.60303e+07	2.09305e+07	8.9323e+06	1.90759	0.161903
Q96HA9	Peroxisomal membrane protein 11C OS=Homo sapiens OX=9606 GN=PEX11G PE=1 SV=1 - [PX11C_HUMAN]	9.82891e+06	5.13239e+06	4.35035e+06	7.89496e+06	4.55494e+06	5.23795e+07	3.35701	0.383334
Q13619	Cullin-4A OS=Homo sapiens OX=9606 GN=CUL4A PE=1 SV=3 - [CUL4A_HUMAN]	1.82944e+07	1.00431e+07	1.1292e+07	1.75091e+07	2.00611e+07	1.20529e+08	3.98942	0.31028
Q9NVH0	Exonuclease 3'-5' domain-containing protein 2 OS=Homo sapiens OX=9606 GN=EXD2 PE=1 SV=2 - [EXD2_HUMAN]	3.94057e+07	7.38415e+06	5.61946e+06	3.03018e+07	7.89824e+06	4.41689e+06	0.813156	0.822765
Q68CZ6	HAUS augmin-like complex subunit 3 OS=Homo sapiens OX=9606 GN=HAUS3 PE=1 SV=1 - [HAUS3_HUMAN]	7.05933e+06	3.34761e+06	4.11426e+06	1.57135e+07	1.33654e+07	8.46571e+06	2.5855	0.0336577
Q9UHD8	Septin-9 OS=Homo sapiens OX=9606 GN=SEPTIN9 PE=1 SV=2 - [SEPT9_HUMAN]	2.18586e+07	5.54094e+06	2.77201e+06	4.59895e+07	2.33724e+07	1.24126e+07	2.71031	0.210351
Q9BTX1	Nucleoporin NDC1 OS=Homo sapiens OX=9606 GN=NDC1 PE=1 SV=2 - [NDC1_HUMAN]	2.36183e+07	6.22482e+06	5.06875e+06	4.776e+07	6.60933e+07	5.62988e+07	4.87376	0.00488763
Q9UL40	Zinc finger protein 346 OS=Homo sapiens OX=9606 GN=ZNF346 PE=1 SV=1 - [ZN346_HUMAN]	4.97744e+07	5.54814e+07	5.73742e+07	4.8822e+06	4.16987e+07	5.19133e+07	0.605634	0.213459
Q8IYL3	UPF0688 protein C1orf174 OS=Homo sapiens OX=9606 GN=C1orf174 PE=1 SV=2 - [CA174_HUMAN]	4.61692e+06	1.80889e+07	4.47257e+07	9.79423e+06	2.1025e+07	1.73136e+07	0.713802	0.626944
Q92506	(3R)-3-hydroxyacyl-CoA dehydrogenase OS=Homo sapiens OX=9606 GN=HSD17B8 PE=1 SV=2 - [DHB8_HUMAN]	1.47039e+07	3.52649e+06	6.52977e+06	1.27015e+07	1.20907e+07	3.20762e+07	2.29677	0.219747
Q5VVQ6	Ubiquitin thioesterase OTU1 OS=Homo sapiens OX=9606 GN=YOD1 PE=1 SV=1 - [OTU1_HUMAN]	1.19615e+07	5.67504e+06	4.26703e+06	1.75054e+07	3.18906e+06	1.85936e+07	1.79368	0.351362
O43172	U4/U6 small nuclear ribonucleoprotein Prp4 OS=Homo sapiens OX=9606 GN=PRPF4 PE=1 SV=2 - [PRP4_HUMAN]	6.72266e+06	9.60531e+06	5.00695e+06	1.66686e+06	1.61519e+07	1.78386e+07	1.67132	0.419041
P53004	Biliverdin reductase A OS=Homo sapiens OX=9606 GN=BLVRA PE=1 SV=2 - [BIEA_HUMAN]	2.67123e+07	8.7509e+06	2.92824e+06	9.88768e+06	1.96687e+07	1.05973e+07	1.0459	0.943724
Q92979	Ribosomal RNA small subunit methyltransferase NEP1 OS=Homo sapiens OX=9606 GN=EMG1 PE=1 SV=4 - [NEP1_HUMAN]	1.9441e+07	9.80645e+06	1.40864e+07	7.96752e+06	4.86555e+07	7.3729e+06	1.47681	0.647254
P49841	Glycogen synthase kinase-3 beta OS=Homo sapiens OX=9606 GN=GSK3B PE=1 SV=2 - [GSK3B_HUMAN]	4.93655e+07	7.48982e+06	4.65387e+06	9.59314e+07	5.18629e+07	9.3749e+07	3.92695	0.042077
A1L0T0	2-hydroxyacyl-CoA lyase 2 OS=Homo sapiens OX=9606 GN=ILVBL PE=1 SV=2 - [HACL2_HUMAN]	3.75003e+07	6.52796e+06	3.51989e+06	5.1828e+06	1.22061e+07	1.38377e+07	0.656736	0.651984
P32929	Cystathionine gamma-lyase OS=Homo sapiens OX=9606 GN=CTH PE=1 SV=3 - [CGL_HUMAN]	1.17178e+07	3.78353e+06	5.41752e+06	7.82576e+06	7.32146e+06	8.93973e+06	1.15145	0.69049
Q0VG06	Fanconi anemia core complex-associated protein 100 OS=Homo sapiens OX=9606 GN=FAAP100 PE=1 SV=3 - [FP100_HUMAN]	3.39434e+06	4.18124e+06	1.64813e+06	5.61351e+07	7.42815e+07	1.78287e+07	16.0722	0.0497069
Q6P1J9	Parafibromin OS=Homo sapiens OX=9606 GN=CDC73 PE=1 SV=1 - [CDC73_HUMAN]	1.10911e+07	1.86361e+07	7.23469e+06	5.3826e+07	3.72439e+07	4.71973e+07	3.7408	0.00452161
Q9GZT9	Egl nine homolog 1 OS=Homo sapiens OX=9606 GN=EGLN1 PE=1 SV=1 - [EGLN1_HUMAN]	1.56895e+07	7.00668e+06	4.46522e+06	5.2961e+06	5.14236e+06	8.89893e+06	0.711943	0.51032
O75364	Pituitary homeobox 3 OS=Homo sapiens OX=9606 GN=PITX3 PE=1 SV=1 - [PITX3_HUMAN]	4.88447e+07	3.97651e+07	1.40552e+07	3.53891e+07	9.68083e+06	6.15147e+06	0.498917	0.285111
Q9Y3D5	28S ribosomal protein S18c, mitochondrial OS=Homo sapiens OX=9606 GN=MRPS18C PE=1 SV=1 - [RT18C_HUMAN]	6.33626e+06	2.05281e+07	5.55594e+06	2.1227e+07	2.21576e+07	1.03613e+07	1.65778	0.313148
Q99459	Cell division cycle 5-like protein OS=Homo sapiens OX=9606 GN=CDC5L PE=1 SV=2 - [CDC5L_HUMAN]	8.5122e+06	1.37526e+07	3.22977e+06	2.7783e+07	2.13126e+07	1.05819e+07	2.34079	0.123942
P54750	Calcium/calmodulin-dependent 3',5'-cyclic nucleotide phosphodiesterase 1A OS=Homo sapiens OX=9606 GN=PDE1A PE=1 SV=2 - [PDE1A_HUMAN]	8.56487e+06	1.94316e+07	8.92054e+06	3.90089e+07	3.31154e+07	1.46054e+07	2.34932	0.111924
O94966	Ubiquitin carboxyl-terminal hydrolase 19 OS=Homo sapiens OX=9606 GN=USP19 PE=1 SV=2 - [UBP19_HUMAN]	1.23089e+07	1.23337e+07	3.47023e+06	7.57387e+06	3.32765e+07	4.51243e+07	3.0582	0.167924
Q8NCA5	Protein FAM98A OS=Homo sapiens OX=9606 GN=FAM98A PE=1 SV=2 - [FA98A_HUMAN]	4.08924e+06	3.81215e+07	7.46081e+06	5.33025e+07	5.52588e+07	7.19903e+07	3.63491	0.0241368
Q9BUN8	Derlin-1 OS=Homo sapiens OX=9606 GN=DERL1 PE=1 SV=1 - [DERL1_HUMAN]	1.56483e+07	1.22493e+07	3.08257e+06	1.2142e+07	1.37545e+07	4.52379e+06	0.981927	0.970291
P31939	Bifunctional purine biosynthesis protein ATIC OS=Homo sapiens OX=9606 GN=ATIC PE=1 SV=3 - [PUR9_HUMAN]	2.44766e+07	6.39539e+06	1.70859e+07	3.98507e+07	2.9136e+07	3.70328e+07	2.21068	0.0346253
Q15645	Pachytene checkpoint protein 2 homolog OS=Homo sapiens OX=9606 GN=TRIP13 PE=1 SV=2 - [PCH2_HUMAN]	3.3891e+07	3.15689e+07	3.03102e+07	7.44981e+07	6.58829e+07	6.72346e+07	2.16785	0.000203559
O95456	Proteasome assembly chaperone 1 OS=Homo sapiens OX=9606 GN=PSMG1 PE=1 SV=1 - [PSMG1_HUMAN]	5.41714e+06	5.03968e+06	7.69132e+06	2.09203e+07	4.56537e+06	1.0108e+07	1.96129	0.298685
Q92504	Zinc transporter SLC39A7 OS=Homo sapiens OX=9606 GN=SLC39A7 PE=1 SV=2 - [S39A7_HUMAN]	1.06526e+07	2.00018e+06	1.0487e+07	7.07452e+06	6.35649e+06	5.24423e+06	0.807062	0.63557
P15259	Phosphoglycerate mutase 2 OS=Homo sapiens OX=9606 GN=PGAM2 PE=1 SV=3 - [PGAM2_HUMAN]	1.08146e+08	6.59468e+07	8.27468e+07	5.2474e+07	6.51472e+07	7.8034e+07	0.761781	0.227337
Q8N5P1	Zinc finger CCCH domain-containing protein 8 OS=Homo sapiens OX=9606 GN=ZC3H8 PE=1 SV=2 - [ZC3H8_HUMAN]	4.2308e+06	9.57075e+06	5.30529e+06	1.11621e+07	3.74829e+06	1.77375e+07	1.7087	0.358777
P14324	Farnesyl pyrophosphate synthase OS=Homo sapiens OX=9606 GN=FDPS PE=1 SV=4 - [FPPS_HUMAN]	4.06465e+06	1.14013e+07	1.71856e+07	8.01001e+07	6.27321e+07	8.34321e+07	6.92965	0.000980085
P54105	Methylosome subunit pICln OS=Homo sapiens OX=9606 GN=CLNS1A PE=1 SV=1 - [ICLN_HUMAN]	6.93421e+06	1.38195e+07	4.99863e+06	7.85402e+06	5.14084e+07	5.48097e+06	2.51408	0.439801
Q96EY5	Multivesicular body subunit 12A OS=Homo sapiens OX=9606 GN=MVB12A PE=1 SV=1 - [MB12A_HUMAN]	6.79056e+06	8.52046e+06	1.11227e+07	5.33146e+06	2.55851e+07	2.39596e+07	2.07599	0.225261
P06576	ATP synthase subunit beta, mitochondrial OS=Homo sapiens OX=9606 GN=ATP5F1B PE=1 SV=3 - [ATPB_HUMAN]	1.0835e+07	4.05087e+06	2.907e+06	3.93137e+06	6.81272e+06	9.53367e+06	1.13965	0.793212
P34932	Heat shock 70 kDa protein 4 OS=Homo sapiens OX=9606 GN=HSPA4 PE=1 SV=4 - [HSP74_HUMAN]	7.6594e+06	3.35917e+07	8.89584e+06	5.48923e+07	6.40635e+07	6.62446e+07	3.69316	0.0078798
P32780	General transcription factor IIH subunit 1 OS=Homo sapiens OX=9606 GN=GTF2H1 PE=1 SV=1 - [TF2H1_HUMAN]	1.26427e+07	4.11996e+06	7.96145e+06	1.05971e+08	1.29727e+08	1.05568e+08	13.803	0.000226658
O43818	U3 small nucleolar RNA-interacting protein 2 OS=Homo sapiens OX=9606 GN=RRP9 PE=1 SV=1 - [U3IP2_HUMAN]	3.933e+06	7.38005e+06	1.37841e+07	8.91807e+06	4.85376e+07	4.08293e+07	3.91618	0.121982
P35658	Nuclear pore complex protein Nup214 OS=Homo sapiens OX=9606 GN=NUP214 PE=1 SV=2 - [NU214_HUMAN]	1.36273e+07	4.61308e+06	8.47511e+06	2.28723e+07	4.984e+07	5.85636e+07	4.91384	0.0344259
O95707	Ribonuclease P protein subunit p29 OS=Homo sapiens OX=9606 GN=POP4 PE=1 SV=2 - [RPP29_HUMAN]	3.98266e+06	4.72669e+06	5.12848e+06	5.89802e+06	1.62383e+07	2.48097e+07	3.39259	0.114176
O00764	Pyridoxal kinase OS=Homo sapiens OX=9606 GN=PDXK PE=1 SV=1 - [PDXK_HUMAN]	1.15077e+07	2.46661e+06	5.57137e+06	4.4739e+06	1.06814e+07	8.49746e+06	1.21013	0.692197
Q9H307	Pinin OS=Homo sapiens OX=9606 GN=PNN PE=1 SV=5 - [PININ_HUMAN]	1.55974e+07	6.06973e+06	4.84579e+06	4.251e+07	5.56393e+07	3.77743e+07	5.1267	0.00450934
P04839	Cytochrome b-245 heavy chain OS=Homo sapiens OX=9606 GN=CYBB PE=1 SV=2 - [CY24B_HUMAN]	5.53365e+06	4.76386e+06	3.84246e+06	8.54649e+06	1.32777e+07	3.39976e+06	1.78387	0.270794
P36776	Lon protease homolog, mitochondrial OS=Homo sapiens OX=9606 GN=LONP1 PE=1 SV=2 - [LONM_HUMAN]	1.14021e+07	1.00229e+07	6.25553e+06	3.83574e+07	3.69712e+07	3.06142e+07	3.82733	0.000776889
A6NH21	Serine incorporator 4 OS=Homo sapiens OX=9606 GN=SERINC4 PE=2 SV=1 - [SERC4_HUMAN]	1.62936e+07	1.70291e+07	8.17904e+06	9.95852e+06	4.88355e+06	1.52183e+07	0.724315	0.406583
Q16763	Ubiquitin-conjugating enzyme E2 S OS=Homo sapiens OX=9606 GN=UBE2S PE=1 SV=2 - [UBE2S_HUMAN]	4.01028e+07	4.89745e+06	3.71363e+06	6.00653e+06	8.87675e+06	3.70053e+06	0.381489	0.450787
Q9H4L4	Sentrin-specific protease 3 OS=Homo sapiens OX=9606 GN=SENP3 PE=1 SV=2 - [SENP3_HUMAN]	8.20914e+06	9.27683e+06	9.47898e+06	4.40183e+07	4.65636e+07	4.88109e+07	5.16941	1.29286e-05
O60216	Double-strand-break repair protein rad21 homolog OS=Homo sapiens OX=9606 GN=RAD21 PE=1 SV=2 - [RAD21_HUMAN]	7.42366e+06	1.12662e+07	6.19125e+06	6.56868e+07	3.80423e+07	4.6722e+07	6.04679	0.00727975
Q92974	Rho guanine nucleotide exchange factor 2 OS=Homo sapiens OX=9606 GN=ARHGEF2 PE=1 SV=4 - [ARHG2_HUMAN]	1.39959e+07	1.01108e+07	2.09265e+06	4.28829e+07	3.34754e+07	3.51714e+07	4.25696	0.00332673
Q96EK7	Constitutive coactivator of peroxisome proliferator-activated receptor gamma OS=Homo sapiens OX=9606 GN=FAM120B PE=1 SV=1 - [F120B_HUMAN]	4.96434e+07	1.24929e+07	2.60901e+07	4.29127e+07	7.13693e+07	8.39601e+07	2.24697	0.0874489
Q5T3I0	G patch domain-containing protein 4 OS=Homo sapiens OX=9606 GN=GPATCH4 PE=1 SV=2 - [GPTC4_HUMAN]	1.06614e+07	6.82123e+06	8.72486e+06	6.93757e+06	1.23448e+07	6.19039e+06	0.971964	0.917962
Q13724	Mannosyl-oligosaccharide glucosidase OS=Homo sapiens OX=9606 GN=MOGS PE=1 SV=5 - [MOGS_HUMAN]	2.78872e+07	2.28391e+07	6.64562e+07	4.45895e+07	5.25395e+07	4.0242e+07	1.17228	0.661095
Q9P2N5	RNA-binding protein 27 OS=Homo sapiens OX=9606 GN=RBM27 PE=1 SV=2 - [RBM27_HUMAN]	4.17487e+06	4.00869e+06	1.12725e+07	2.42486e+07	2.83491e+07	3.49987e+07	4.50228	0.00450295
P28331	NADH-ubiquinone oxidoreductase 75 kDa subunit, mitochondrial OS=Homo sapiens OX=9606 GN=NDUFS1 PE=1 SV=3 - [NDUS1_HUMAN]	3.11565e+06	6.51349e+06	3.37276e+06	4.31513e+07	6.5224e+07	4.88312e+07	12.091	0.00200643
Q9HBH1	Peptide deformylase, mitochondrial OS=Homo sapiens OX=9606 GN=PDF PE=1 SV=1 - [DEFM_HUMAN]	1.09498e+07	7.24473e+06	4.90459e+06	5.27083e+06	3.48583e+07	4.80032e+06	1.94507	0.510947
Q9NWN3	F-box only protein 34 OS=Homo sapiens OX=9606 GN=FBXO34 PE=1 SV=2 - [FBX34_HUMAN]	1.23931e+06	6.27463e+06	4.49971e+06	7.03247e+06	1.09011e+08	8.67841e+06	10.3817	0.32807
O75880	Protein SCO1 homolog, mitochondrial OS=Homo sapiens OX=9606 GN=SCO1 PE=1 SV=1 - [SCO1_HUMAN]	2.71416e+07	4.45996e+06	6.47523e+06	6.58705e+06	1.28183e+07	1.21571e+07	0.828917	0.786914
Q13057	Bifunctional coenzyme A synthase OS=Homo sapiens OX=9606 GN=COASY PE=1 SV=4 - [COASY_HUMAN]	6.23994e+06	3.15476e+06	6.70265e+06	1.4709e+07	5.72641e+06	7.83212e+07	6.13497	0.294804
Q8N3C0	Activating signal cointegrator 1 complex subunit 3 OS=Homo sapiens OX=9606 GN=ASCC3 PE=1 SV=3 - [ASCC3_HUMAN]	3.72859e+06	3.49219e+06	5.46655e+06	7.22202e+07	1.11758e+08	5.55853e+07	18.8821	0.0105252
O60313	Dynamin-like 120 kDa protein, mitochondrial OS=Homo sapiens OX=9606 GN=OPA1 PE=1 SV=3 - [OPA1_HUMAN]	2.02947e+07	3.69489e+06	1.94437e+07	9.53414e+07	5.25322e+07	6.36828e+07	4.87084	0.0157544
O00429	Dynamin-1-like protein OS=Homo sapiens OX=9606 GN=DNM1L PE=1 SV=2 - [DNM1L_HUMAN]	8.84726e+06	1.31577e+07	8.90016e+06	6.572e+06	5.55479e+06	5.51718e+06	0.570908	0.0396066
Q8TDX7	Serine/threonine-protein kinase Nek7 OS=Homo sapiens OX=9606 GN=NEK7 PE=1 SV=1 - [NEK7_HUMAN]	6.39482e+07	5.03165e+06	4.09966e+07	6.75803e+07	6.97795e+07	5.50523e+07	1.74958	0.196484
P26640	Valine--tRNA ligase OS=Homo sapiens OX=9606 GN=VARS1 PE=1 SV=4 - [SYVC_HUMAN]	5.39567e+07	3.25736e+07	3.09385e+07	3.85493e+07	3.94412e+07	4.73316e+07	1.06685	0.757681
O60341	Lysine-specific histone demethylase 1A OS=Homo sapiens OX=9606 GN=KDM1A PE=1 SV=2 - [KDM1A_HUMAN]	6.36664e+06	5.18064e+06	3.64276e+06	1.14053e+07	4.87341e+06	2.38949e+07	2.64473	0.213544
O75475	PC4 and SFRS1-interacting protein OS=Homo sapiens OX=9606 GN=PSIP1 PE=1 SV=1 - [PSIP1_HUMAN]	3.25517e+06	4.36182e+06	1.2829e+07	7.30966e+07	5.0778e+07	9.07629e+07	10.4978	0.00564143
Q9NW13	RNA-binding protein 28 OS=Homo sapiens OX=9606 GN=RBM28 PE=1 SV=3 - [RBM28_HUMAN]	8.31451e+06	2.02277e+06	4.99308e+06	5.98273e+07	6.67933e+07	4.26665e+07	11.0426	0.00226528
P40227	T-complex protein 1 subunit zeta OS=Homo sapiens OX=9606 GN=CCT6A PE=1 SV=3 - [TCPZ_HUMAN]	2.39829e+07	2.27096e+07	3.14074e+07	8.97184e+07	1.43814e+07	5.58905e+07	2.04854	0.281625
Q9C0K7	STE20-related kinase adapter protein beta OS=Homo sapiens OX=9606 GN=STRADB PE=1 SV=1 - [STRAB_HUMAN]	1.30559e+07	2.44703e+06	3.96173e+06	4.63584e+06	1.26822e+07	8.25348e+07	5.12995	0.343391
P43897	Elongation factor Ts, mitochondrial OS=Homo sapiens OX=9606 GN=TSFM PE=1 SV=2 - [EFTS_HUMAN]	5.902e+07	9.04695e+06	3.50771e+06	3.17296e+06	1.26839e+07	1.48916e+07	0.429601	0.492065
Q8NBM4	Ubiquitin-associated domain-containing protein 2 OS=Homo sapiens OX=9606 GN=UBAC2 PE=1 SV=1 - [UBAC2_HUMAN]	4.33861e+06	8.23764e+06	6.78069e+06	3.97797e+06	7.5414e+06	2.55957e+07	1.91741	0.432377
Q9GZZ9	Ubiquitin-like modifier-activating enzyme 5 OS=Homo sapiens OX=9606 GN=UBA5 PE=1 SV=1 - [UBA5_HUMAN]	6.34153e+06	4.2688e+06	7.6181e+06	6.07141e+06	6.99455e+06	2.86752e+07	2.28989	0.352128
Q5VSY0	G kinase-anchoring protein 1 OS=Homo sapiens OX=9606 GN=GKAP1 PE=1 SV=2 - [GKAP1_HUMAN]	4.72276e+06	1.30225e+07	6.67437e+06	8.98446e+06	5.59642e+07	1.00028e+07	3.06931	0.34359
P50395	Rab GDP dissociation inhibitor beta OS=Homo sapiens OX=9606 GN=GDI2 PE=1 SV=2 - [GDIB_HUMAN]	3.54898e+07	3.97576e+06	7.17974e+06	5.87669e+07	5.66157e+07	5.64981e+07	3.68485	0.0141723
Q9BQ39	ATP-dependent RNA helicase DDX50 OS=Homo sapiens OX=9606 GN=DDX50 PE=1 SV=1 - [DDX50_HUMAN]	4.68267e+06	7.6292e+06	6.10856e+06	4.66402e+08	3.52855e+08	3.26385e+08	62.1941	0.00094126
P51532	Transcription activator BRG1 OS=Homo sapiens OX=9606 GN=SMARCA4 PE=1 SV=2 - [SMCA4_HUMAN]	7.06863e+06	5.02433e+06	5.11251e+06	4.16035e+07	2.62679e+07	5.11879e+07	6.91985	0.00959999
Q8N9Q2	Protein SREK1IP1 OS=Homo sapiens OX=9606 GN=SREK1IP1 PE=1 SV=1 - [SR1IP_HUMAN]	5.00695e+06	6.23432e+06	9.20062e+06	3.4789e+06	1.70926e+08	1.19119e+07	9.11448	0.367543
Q9UL15	BAG family molecular chaperone regulator 5 OS=Homo sapiens OX=9606 GN=BAG5 PE=1 SV=1 - [BAG5_HUMAN]	5.88618e+06	5.98658e+06	3.60558e+06	7.47582e+06	9.79694e+06	6.51665e+06	1.53695	0.090282
P51648	Aldehyde dehydrogenase family 3 member A2 OS=Homo sapiens OX=9606 GN=ALDH3A2 PE=1 SV=1 - [AL3A2_HUMAN]	6.54291e+06	6.41803e+06	1.02812e+07	6.06846e+06	3.40087e+07	3.49333e+07	3.22735	0.145247
Q2M2I5	Keratin, type I cytoskeletal 24 OS=Homo sapiens OX=9606 GN=KRT24 PE=1 SV=1 - [K1C24_HUMAN]	4.11944e+09	7.67505e+08	4.27545e+08	5.07489e+08	4.73143e+08	4.13726e+08	0.262369	0.329652
P30044	Peroxiredoxin-5, mitochondrial OS=Homo sapiens OX=9606 GN=PRDX5 PE=1 SV=4 - [PRDX5_HUMAN]	1.06386e+07	8.46043e+06	6.29075e+06	6.91645e+06	5.50829e+07	2.11389e+07	3.27448	0.250676
Q8NB91	Fanconi anemia group B protein OS=Homo sapiens OX=9606 GN=FANCB PE=1 SV=1 - [FANCB_HUMAN]	7.41338e+06	8.7825e+06	4.88626e+06	2.5989e+07	1.17813e+07	3.38558e+07	3.39748	0.0620758
Q9UMS0	NFU1 iron-sulfur cluster scaffold homolog, mitochondrial OS=Homo sapiens OX=9606 GN=NFU1 PE=1 SV=2 - [NFU1_HUMAN]	5.20692e+06	9.66474e+06	4.22904e+06	2.04047e+07	2.50829e+07	1.70977e+07	3.2766	0.00711625
P13804	Electron transfer flavoprotein subunit alpha, mitochondrial OS=Homo sapiens OX=9606 GN=ETFA PE=1 SV=1 - [ETFA_HUMAN]	2.10994e+07	9.29614e+06	6.53022e+06	5.0066e+06	1.11907e+07	1.92146e+07	0.959003	0.937764
Q53H96	Pyrroline-5-carboxylate reductase 3 OS=Homo sapiens OX=9606 GN=PYCR3 PE=1 SV=3 - [P5CR3_HUMAN]	5.10295e+06	2.55448e+06	6.16641e+06	4.84411e+06	1.15253e+07	6.60304e+06	1.6618	0.250036
Q96K21	Abscission/NoCut checkpoint regulator OS=Homo sapiens OX=9606 GN=ZFYVE19 PE=1 SV=3 - [ANCHR_HUMAN]	1.09969e+07	5.53173e+06	6.33011e+06	2.18662e+07	1.37956e+07	3.23313e+06	1.70153	0.398263
P57081	tRNA (guanine-N(7)-)-methyltransferase non-catalytic subunit WDR4 OS=Homo sapiens OX=9606 GN=WDR4 PE=1 SV=2 - [WDR4_HUMAN]	1.10512e+07	4.58948e+06	5.473e+06	3.20962e+07	6.41448e+06	1.10865e+07	2.34905	0.308916
Q15738	Sterol-4-alpha-carboxylate 3-dehydrogenase, decarboxylating OS=Homo sapiens OX=9606 GN=NSDHL PE=1 SV=2 - [NSDHL_HUMAN]	1.61038e+07	5.69317e+06	1.16385e+07	4.16475e+06	4.65065e+06	6.80046e+06	0.467045	0.129874
P61160	Actin-related protein 2 OS=Homo sapiens OX=9606 GN=ACTR2 PE=1 SV=1 - [ARP2_HUMAN]	1.76676e+07	1.76195e+08	6.09544e+06	3.52366e+08	1.31531e+07	4.87095e+07	2.07158	0.586192
O15213	WD repeat-containing protein 46 OS=Homo sapiens OX=9606 GN=WDR46 PE=1 SV=3 - [WDR46_HUMAN]	1.59616e+07	1.17601e+07	3.86865e+06	3.50303e+07	3.26844e+07	4.11654e+06	2.27384	0.272476
O15226	NF-kappa-B-repressing factor OS=Homo sapiens OX=9606 GN=NKRF PE=1 SV=2 - [NKRF_HUMAN]	8.40724e+06	5.32297e+06	2.44466e+06	3.90124e+06	6.8107e+07	4.78438e+06	4.74765	0.397043
P28702	Retinoic acid receptor RXR-beta OS=Homo sapiens OX=9606 GN=RXRB PE=1 SV=2 - [RXRB_HUMAN]	3.55052e+06	3.60608e+06	1.55165e+07	2.64873e+07	2.97364e+06	7.6796e+06	1.63809	0.588577
Q99445	Glycosyl-phosphatidylinositol-anchored molecule-like protein OS=Homo sapiens OX=9606 GN=GML PE=2 SV=1 - [GML_HUMAN]	8.2525e+06	1.15643e+08	3.68032e+06	1.41422e+07	6.67761e+06	8.05861e+06	0.226363	0.420167
Q13823	Nucleolar GTP-binding protein 2 OS=Homo sapiens OX=9606 GN=GNL2 PE=1 SV=1 - [NOG2_HUMAN]	1.00891e+07	3.12062e+06	8.62803e+06	3.74095e+07	5.53623e+07	5.15976e+07	6.61099	0.00223244
Q99613	Eukaryotic translation initiation factor 3 subunit C OS=Homo sapiens OX=9606 GN=EIF3C PE=1 SV=1 - [EIF3C_HUMAN]	1.02179e+07	4.39308e+06	3.73066e+06	5.62364e+07	3.88443e+07	5.35665e+06	5.47591	0.143609
O75319	RNA/RNP complex-1-interacting phosphatase OS=Homo sapiens OX=9606 GN=DUSP11 PE=1 SV=2 - [DUS11_HUMAN]	1.19906e+07	4.42425e+06	2.90136e+06	1.09855e+07	1.70091e+07	4.63938e+06	1.68946	0.383962
P40692	DNA mismatch repair protein Mlh1 OS=Homo sapiens OX=9606 GN=MLH1 PE=1 SV=1 - [MLH1_HUMAN]	1.00773e+07	6.61862e+06	4.50002e+06	1.12905e+07	2.15204e+07	1.43227e+07	2.22371	0.0659072
O14734	Acyl-coenzyme A thioesterase 8 OS=Homo sapiens OX=9606 GN=ACOT8 PE=1 SV=1 - [ACOT8_HUMAN]	6.25596e+06	1.93161e+07	7.56338e+06	5.69198e+06	6.90974e+06	2.53925e+07	1.14663	0.841809
Q9UJW0	Dynactin subunit 4 OS=Homo sapiens OX=9606 GN=DCTN4 PE=1 SV=1 - [DCTN4_HUMAN]	7.91688e+06	3.67726e+06	7.10597e+06	9.85825e+06	1.02002e+07	6.28682e+06	1.40883	0.230613
Q96IJ6	Mannose-1-phosphate guanyltransferase alpha OS=Homo sapiens OX=9606 GN=GMPPA PE=1 SV=1 - [GMPPA_HUMAN]	1.15285e+07	1.65474e+07	2.62843e+07	2.04685e+07	8.65139e+06	1.1026e+07	0.738515	0.447991
P16520	Guanine nucleotide-binding protein G(I)/G(S)/G(T) subunit beta-3 OS=Homo sapiens OX=9606 GN=GNB3 PE=1 SV=1 - [GBB3_HUMAN]	6.88393e+06	5.82045e+06	4.99655e+06	3.09756e+06	1.07037e+07	4.0767e+07	3.08279	0.345938
Q96PU8	Protein quaking OS=Homo sapiens OX=9606 GN=QKI PE=1 SV=1 - [QKI_HUMAN]	2.26201e+07	1.18032e+08	4.80498e+06	2.19345e+07	4.06268e+06	5.25478e+06	0.214854	0.345415
Q13595	Transformer-2 protein homolog alpha OS=Homo sapiens OX=9606 GN=TRA2A PE=1 SV=1 - [TRA2A_HUMAN]	8.3619e+06	7.18472e+06	5.66012e+06	1.03532e+08	2.31643e+07	1.17885e+08	11.5332	0.0649862
P35900	Keratin, type I cytoskeletal 20 OS=Homo sapiens OX=9606 GN=KRT20 PE=1 SV=1 - [K1C20_HUMAN]	5.86507e+09	8.64429e+09	1.03707e+10	8.8801e+08	7.81299e+08	8.50066e+08	0.101261	0.00474951
Q9NVX2	Notchless protein homolog 1 OS=Homo sapiens OX=9606 GN=NLE1 PE=1 SV=4 - [NLE1_HUMAN]	5.42879e+06	2.45433e+06	9.88493e+06	5.06173e+06	8.70432e+06	5.60701e+06	1.09033	0.837115
O94776	Metastasis-associated protein MTA2 OS=Homo sapiens OX=9606 GN=MTA2 PE=1 SV=1 - [MTA2_HUMAN]	1.20322e+07	9.42133e+06	4.88152e+06	7.65515e+06	1.74509e+07	1.02435e+07	1.3423	0.450747
O95292	Vesicle-associated membrane protein-associated protein B/C OS=Homo sapiens OX=9606 GN=VAPB PE=1 SV=3 - [VAPB_HUMAN]	1.10336e+07	1.12608e+07	6.20801e+06	9.20317e+06	1.19698e+07	9.48884e+06	1.07577	0.71949
Q13620	Cullin-4B OS=Homo sapiens OX=9606 GN=CUL4B PE=1 SV=4 - [CUL4B_HUMAN]	1.28905e+07	5.08001e+06	5.87558e+06	1.75091e+07	2.5029e+07	1.20529e+08	6.83831	0.235299
O95747	Serine/threonine-protein kinase OSR1 OS=Homo sapiens OX=9606 GN=OXSR1 PE=1 SV=1 - [OXSR1_HUMAN]	7.02662e+06	7.93611e+06	6.79151e+06	6.73712e+06	2.38933e+07	1.66894e+06	1.48474	0.629232
Q9HAU0	Pleckstrin homology domain-containing family A member 5 OS=Homo sapiens OX=9606 GN=PLEKHA5 PE=1 SV=1 - [PKHA5_HUMAN]	6.79702e+07	5.77813e+07	1.27022e+08	6.72219e+06	6.93565e+06	5.37562e+06	0.0752986	0.0225775
Q9Y3L5	Ras-related protein Rap-2c OS=Homo sapiens OX=9606 GN=RAP2C PE=1 SV=1 - [RAP2C_HUMAN]	2.29645e+07	3.84859e+06	1.24695e+07	6.79951e+06	4.07452e+06	2.52101e+07	0.91858	0.907722
Q92945	Far upstream element-binding protein 2 OS=Homo sapiens OX=9606 GN=KHSRP PE=1 SV=4 - [FUBP2_HUMAN]	1.27784e+07	4.11682e+06	2.31856e+06	1.0022e+08	1.08634e+08	1.03181e+08	16.2402	1.77853e-05
O60841	Eukaryotic translation initiation factor 5B OS=Homo sapiens OX=9606 GN=EIF5B PE=1 SV=4 - [IF2P_HUMAN]	4.13283e+06	3.20857e+06	6.23086e+06	6.69138e+07	7.26369e+07	5.99518e+07	14.6993	8.05912e-05
Q15287	RNA-binding protein with serine-rich domain 1 OS=Homo sapiens OX=9606 GN=RNPS1 PE=1 SV=1 - [RNPS1_HUMAN]	1.42722e+07	5.2961e+06	2.96151e+06	4.70014e+07	7.91523e+06	3.43999e+07	3.96438	0.137726
Q13637	Ras-related protein Rab-32 OS=Homo sapiens OX=9606 GN=RAB32 PE=1 SV=3 - [RAB32_HUMAN]	1.31723e+07	5.45482e+06	6.48331e+06	6.81839e+06	1.58656e+07	1.47639e+08	6.78297	0.348037
Q7Z417	Nuclear fragile X mental retardation-interacting protein 2 OS=Homo sapiens OX=9606 GN=NUFIP2 PE=1 SV=1 - [NUFP2_HUMAN]	1.68226e+07	5.28756e+07	4.25749e+07	5.80434e+06	6.35165e+06	5.22066e+06	0.154771	0.0420117
Q13011	Delta(3,5)-Delta(2,4)-dienoyl-CoA isomerase, mitochondrial OS=Homo sapiens OX=9606 GN=ECH1 PE=1 SV=2 - [ECH1_HUMAN]	1.246e+07	7.36932e+06	3.28213e+06	7.14202e+06	1.00146e+07	6.93854e+06	1.04256	0.913476
Q05048	Cleavage stimulation factor subunit 1 OS=Homo sapiens OX=9606 GN=CSTF1 PE=1 SV=1 - [CSTF1_HUMAN]	7.83934e+06	1.23012e+07	3.70079e+06	3.84265e+07	1.99723e+07	4.12217e+07	4.17848	0.0237813
Q9UHB6	LIM domain and actin-binding protein 1 OS=Homo sapiens OX=9606 GN=LIMA1 PE=1 SV=1 - [LIMA1_HUMAN]	9.53896e+06	2.97179e+06	4.65613e+06	1.3393e+08	4.43991e+06	3.32189e+07	9.99532	0.260487
Q86UK7	E3 ubiquitin-protein ligase ZNF598 OS=Homo sapiens OX=9606 GN=ZNF598 PE=1 SV=1 - [ZN598_HUMAN]	1.94006e+07	6.37238e+06	1.47601e+07	9.67882e+06	9.47832e+06	2.43548e+07	1.07349	0.881071
Q9UIV8	Serpin B13 OS=Homo sapiens OX=9606 GN=SERPINB13 PE=1 SV=2 - [SPB13_HUMAN]	1.49765e+07	4.04806e+06	4.54633e+07	1.04667e+07	6.18011e+06	8.06532e+06	0.383205	0.347048
P57088	Transmembrane protein 33 OS=Homo sapiens OX=9606 GN=TMEM33 PE=1 SV=2 - [TMM33_HUMAN]	1.34069e+08	8.69993e+07	6.37667e+07	3.05443e+07	8.06237e+07	6.25844e+07	0.610011	0.217746
Q9UET6	Putative tRNA (cytidine(32)/guanosine(34)-2'-O)-methyltransferase OS=Homo sapiens OX=9606 GN=FTSJ1 PE=1 SV=2 - [TRM7_HUMAN]	2.16926e+07	1.86039e+07	6.21232e+06	7.9609e+06	4.37355e+07	5.38223e+07	2.26879	0.251764
O14562	Ubiquitin domain-containing protein UBFD1 OS=Homo sapiens OX=9606 GN=UBFD1 PE=1 SV=2 - [UBFD1_HUMAN]	1.5016e+07	6.21964e+06	3.70464e+06	7.85783e+06	5.23697e+06	9.16434e+06	0.892497	0.817064
O15143	Actin-related protein 2/3 complex subunit 1B OS=Homo sapiens OX=9606 GN=ARPC1B PE=1 SV=3 - [ARC1B_HUMAN]	2.63099e+07	2.41212e+07	4.38508e+07	7.56114e+07	4.39582e+06	2.90977e+07	1.15722	0.831737
P07199	Major centromere autoantigen B OS=Homo sapiens OX=9606 GN=CENPB PE=1 SV=2 - [CENPB_HUMAN]	9.21339e+06	5.3433e+06	6.65451e+06	3.41836e+07	3.14837e+07	3.17114e+07	4.59091	5.8774e-05
O15260	Surfeit locus protein 4 OS=Homo sapiens OX=9606 GN=SURF4 PE=1 SV=3 - [SURF4_HUMAN]	2.50886e+06	6.81036e+06	4.92947e+06	1.21285e+07	1.09286e+07	1.44764e+07	2.63417	0.00876927
Q14444	Caprin-1 OS=Homo sapiens OX=9606 GN=CAPRIN1 PE=1 SV=2 - [CAPR1_HUMAN]	4.23902e+06	5.15271e+06	3.4647e+06	4.89338e+06	8.36928e+07	6.36078e+07	11.838	0.120969
Q969V3	Nicalin OS=Homo sapiens OX=9606 GN=NCLN PE=1 SV=2 - [NCLN_HUMAN]	1.25137e+07	3.5155e+06	5.63975e+06	1.55391e+07	7.80935e+07	7.85006e+07	7.94379	0.0761921
Q96RS6	NudC domain-containing protein 1 OS=Homo sapiens OX=9606 GN=NUDCD1 PE=1 SV=2 - [NUDC1_HUMAN]	7.62021e+06	4.63006e+06	7.75879e+06	6.07171e+07	1.99281e+07	7.69292e+06	4.41491	0.229163
Q9HD33	39S ribosomal protein L47, mitochondrial OS=Homo sapiens OX=9606 GN=MRPL47 PE=1 SV=2 - [RM47_HUMAN]	2.93712e+07	2.81728e+07	1.38099e+07	8.74908e+06	9.80102e+06	5.75068e+06	0.340567	0.0380741
Q12933	TNF receptor-associated factor 2 OS=Homo sapiens OX=9606 GN=TRAF2 PE=1 SV=2 - [TRAF2_HUMAN]	1.35595e+07	3.74095e+07	2.85048e+07	1.94029e+08	2.30453e+08	1.4188e+08	7.12642	0.00366512
P02788	Lactotransferrin OS=Homo sapiens OX=9606 GN=LTF PE=1 SV=6 - [TRFL_HUMAN]	1.99129e+07	6.66374e+06	3.5456e+06	7.33249e+07	1.03901e+07	9.50727e+06	3.0948	0.387582
Q9HBH5	Retinol dehydrogenase 14 OS=Homo sapiens OX=9606 GN=RDH14 PE=1 SV=1 - [RDH14_HUMAN]	4.25994e+06	1.24048e+07	7.22817e+06	1.511e+07	1.4837e+07	7.96311e+06	1.58667	0.233965
P59998	Actin-related protein 2/3 complex subunit 4 OS=Homo sapiens OX=9606 GN=ARPC4 PE=1 SV=3 - [ARPC4_HUMAN]	2.22022e+07	4.10059e+06	5.02816e+06	9.89316e+06	2.75281e+07	1.26208e+07	1.59721	0.481311
P61201	COP9 signalosome complex subunit 2 OS=Homo sapiens OX=9606 GN=COPS2 PE=1 SV=1 - [CSN2_HUMAN]	1.83949e+07	5.54363e+06	3.68977e+06	6.87629e+06	7.42109e+06	3.00972e+06	0.626428	0.515445
O60427	Acyl-CoA (8-3)-desaturase OS=Homo sapiens OX=9606 GN=FADS1 PE=1 SV=3 - [FADS1_HUMAN]	5.38569e+06	2.5575e+06	6.96456e+06	4.24991e+06	8.73151e+06	9.95852e+06	1.53879	0.283175
Q9H8G2	Caspase activity and apoptosis inhibitor 1 OS=Homo sapiens OX=9606 GN=CAAP1 PE=1 SV=2 - [CAAP1_HUMAN]	1.51761e+07	5.36185e+06	6.35738e+06	8.27369e+06	4.29522e+06	1.36358e+07	0.974323	0.958215
P38117	Electron transfer flavoprotein subunit beta OS=Homo sapiens OX=9606 GN=ETFB PE=1 SV=3 - [ETFB_HUMAN]	4.10315e+06	3.38096e+06	8.13381e+06	3.23486e+07	7.18621e+06	4.02392e+07	5.10786	0.101055
Q08554	Desmocollin-1 OS=Homo sapiens OX=9606 GN=DSC1 PE=1 SV=2 - [DSC1_HUMAN]	7.58108e+07	4.15717e+07	6.00974e+07	3.51934e+07	7.69025e+06	5.21188e+07	0.535285	0.166835
O75439	Mitochondrial-processing peptidase subunit beta OS=Homo sapiens OX=9606 GN=PMPCB PE=1 SV=2 - [MPPB_HUMAN]	8.01905e+06	4.24902e+06	7.33823e+06	2.82647e+07	1.22247e+07	7.95649e+06	2.47094	0.201152
Q9C0D3	Protein zyg-11 homolog B OS=Homo sapiens OX=9606 GN=ZYG11B PE=1 SV=2 - [ZY11B_HUMAN]	7.90536e+06	1.01438e+07	3.823e+07	1.17854e+07	1.15773e+07	2.31499e+07	0.826463	0.771565
Q9NYH9	U3 small nucleolar RNA-associated protein 6 homolog OS=Homo sapiens OX=9606 GN=UTP6 PE=1 SV=2 - [UTP6_HUMAN]	1.84779e+07	9.27361e+06	5.02155e+06	5.30702e+07	4.26694e+07	5.46077e+07	4.58752	0.00199733
Q8IWS0	PHD finger protein 6 OS=Homo sapiens OX=9606 GN=PHF6 PE=1 SV=1 - [PHF6_HUMAN]	1.01916e+08	5.47821e+07	8.36986e+07	6.63181e+07	9.76353e+07	9.04489e+07	1.05826	0.79336
Q6XQN6	Nicotinate phosphoribosyltransferase OS=Homo sapiens OX=9606 GN=NAPRT PE=1 SV=2 - [PNCB_HUMAN]	1.09187e+07	6.72499e+06	1.4836e+07	2.99344e+07	1.01375e+07	5.99156e+06	1.41822	0.590411
Q13884	Beta-1-syntrophin OS=Homo sapiens OX=9606 GN=SNTB1 PE=1 SV=3 - [SNTB1_HUMAN]	5.37264e+06	3.51502e+06	6.48376e+06	1.36169e+07	5.12528e+06	1.30469e+07	2.06806	0.129621
Q13247	Serine/arginine-rich splicing factor 6 OS=Homo sapiens OX=9606 GN=SRSF6 PE=1 SV=2 - [SRSF6_HUMAN]	1.93014e+07	5.04982e+06	6.85393e+06	7.23305e+07	1.65692e+07	1.11134e+07	3.20502	0.316801
O60443	Gasdermin-E OS=Homo sapiens OX=9606 GN=GSDME PE=1 SV=2 - [GSDME_HUMAN]	3.41251e+06	5.81279e+06	1.00891e+07	4.94957e+07	6.28278e+07	4.69233e+07	8.24496	0.00092069
Q7Z2T5	TRMT1-like protein OS=Homo sapiens OX=9606 GN=TRMT1L PE=1 SV=2 - [TRM1L_HUMAN]	4.89813e+06	4.81532e+06	3.37019e+06	4.20266e+07	4.30437e+07	6.66928e+06	7.01178	0.0936384
P31350	Ribonucleoside-diphosphate reductase subunit M2 OS=Homo sapiens OX=9606 GN=RRM2 PE=1 SV=1 - [RIR2_HUMAN]	1.11652e+07	1.00612e+07	7.22417e+06	4.28116e+07	8.07427e+06	7.20516e+06	2.04183	0.449008
Q7L3T8	Probable proline--tRNA ligase, mitochondrial OS=Homo sapiens OX=9606 GN=PARS2 PE=1 SV=1 - [SYPM_HUMAN]	5.27778e+06	1.24989e+07	1.64833e+07	5.45028e+06	3.48124e+07	1.44193e+07	1.59609	0.504145
Q6IAN0	Dehydrogenase/reductase SDR family member 7B OS=Homo sapiens OX=9606 GN=DHRS7B PE=1 SV=2 - [DRS7B_HUMAN]	4.02233e+06	9.19488e+06	5.84187e+06	1.31376e+07	6.49861e+06	3.46975e+06	1.21233	0.697833
Q9NXE4	Sphingomyelin phosphodiesterase 4 OS=Homo sapiens OX=9606 GN=SMPD4 PE=1 SV=3 - [NSMA3_HUMAN]	2.80603e+06	1.42297e+07	9.29356e+06	4.05529e+07	3.47257e+07	1.97685e+07	3.60994	0.0309712
P78347	General transcription factor II-I OS=Homo sapiens OX=9606 GN=GTF2I PE=1 SV=2 - [GTF2I_HUMAN]	1.13911e+07	6.15232e+06	8.71035e+06	2.82236e+07	5.24631e+07	5.42605e+07	5.14011	0.0131875
O14828	Secretory carrier-associated membrane protein 3 OS=Homo sapiens OX=9606 GN=SCAMP3 PE=1 SV=3 - [SCAM3_HUMAN]	1.16967e+07	1.55674e+06	8.79895e+06	3.97631e+06	7.01105e+06	9.33812e+06	0.92169	0.87346
P62993	Growth factor receptor-bound protein 2 OS=Homo sapiens OX=9606 GN=GRB2 PE=1 SV=1 - [GRB2_HUMAN]	8.37118e+06	5.16022e+06	4.24873e+06	6.65866e+06	5.74072e+06	3.51958e+07	2.67687	0.365665
Q9NQG5	Regulation of nuclear pre-mRNA domain-containing protein 1B OS=Homo sapiens OX=9606 GN=RPRD1B PE=1 SV=1 - [RPR1B_HUMAN]	9.93715e+06	6.6347e+06	9.00191e+06	5.57291e+06	1.71713e+07	8.27943e+06	1.21311	0.643794
P28072	Proteasome subunit beta type-6 OS=Homo sapiens OX=9606 GN=PSMB6 PE=1 SV=4 - [PSB6_HUMAN]	7.18123e+06	2.84402e+06	1.44203e+07	6.27637e+06	7.62655e+06	6.21706e+06	0.823052	0.693977
P84098	60S ribosomal protein L19 OS=Homo sapiens OX=9606 GN=RPL19 PE=1 SV=1 - [RL19_HUMAN]	7.46287e+06	7.95097e+06	4.26555e+06	7.10534e+07	6.63608e+06	8.51557e+07	8.27491	0.11985
Q9NVS2	39S ribosomal protein S18a, mitochondrial OS=Homo sapiens OX=9606 GN=MRPS18A PE=1 SV=1 - [RT18A_HUMAN]	6.54641e+07	6.86249e+06	5.60496e+07	8.25079e+06	1.2492e+07	5.02851e+06	0.200748	0.134953
Q9Y678	Coatomer subunit gamma-1 OS=Homo sapiens OX=9606 GN=COPG1 PE=1 SV=1 - [COPG1_HUMAN]	4.15351e+06	1.49092e+07	3.46855e+06	2.99116e+07	4.60245e+07	1.15653e+07	3.88356	0.111076
Q9UN37	Vacuolar protein sorting-associated protein 4A OS=Homo sapiens OX=9606 GN=VPS4A PE=1 SV=1 - [VPS4A_HUMAN]	5.59497e+06	6.572e+06	3.36343e+06	8.17451e+06	3.82432e+07	4.04077e+06	3.24901	0.342479
Q5XPI4	E3 ubiquitin-protein ligase RNF123 OS=Homo sapiens OX=9606 GN=RNF123 PE=1 SV=1 - [RN123_HUMAN]	1.16641e+08	6.38375e+07	6.60671e+06	4.60765e+06	5.99851e+07	6.17356e+07	0.675245	0.612279
P04040	Catalase OS=Homo sapiens OX=9606 GN=CAT PE=1 SV=3 - [CATA_HUMAN]	9.76575e+06	4.36455e+06	1.44754e+07	3.99953e+06	1.03685e+07	1.13477e+07	0.898972	0.808452
Q9Y6E2	eIF5-mimic protein 1 OS=Homo sapiens OX=9606 GN=BZW2 PE=1 SV=1 - [5MP1_HUMAN]	1.26752e+07	4.01648e+06	4.03965e+06	3.4122e+07	8.56012e+06	4.86227e+06	2.29337	0.406331
O95373	Importin-7 OS=Homo sapiens OX=9606 GN=IPO7 PE=1 SV=1 - [IPO7_HUMAN]	1.3931e+07	7.87474e+06	5.81078e+06	2.85839e+07	9.08259e+07	2.01657e+07	5.05405	0.171272
Q9Y266	Nuclear migration protein nudC OS=Homo sapiens OX=9606 GN=NUDC PE=1 SV=1 - [NUDC_HUMAN]	9.21019e+06	6.95828e+06	1.53074e+06	3.47739e+07	2.52101e+07	1.80663e+07	4.40982	0.0197678
Q96T51	RUN and FYVE domain-containing protein 1 OS=Homo sapiens OX=9606 GN=RUFY1 PE=1 SV=2 - [RUFY1_HUMAN]	4.87949e+06	5.71372e+06	6.38431e+06	8.39601e+07	4.47359e+06	1.19268e+07	5.91137	0.334447
O75390	Citrate synthase, mitochondrial OS=Homo sapiens OX=9606 GN=CS PE=1 SV=2 - [CISY_HUMAN]	6.09955e+07	6.79009e+06	8.19436e+06	7.67041e+07	8.43392e+07	6.3357e+07	2.95341	0.0586313
O60231	Pre-mRNA-splicing factor ATP-dependent RNA helicase DHX16 OS=Homo sapiens OX=9606 GN=DHX16 PE=1 SV=2 - [DHX16_HUMAN]	1.44922e+08	5.08212e+06	8.51692e+06	3.88443e+07	2.69672e+07	7.04258e+07	0.859428	0.884138
Q9BY77	Polymerase delta-interacting protein 3 OS=Homo sapiens OX=9606 GN=POLDIP3 PE=1 SV=2 - [PDIP3_HUMAN]	2.03214e+07	8.5536e+06	5.2127e+06	9.68956e+06	4.34432e+06	5.94058e+07	2.15443	0.509189
Q9HCD5	Nuclear receptor coactivator 5 OS=Homo sapiens OX=9606 GN=NCOA5 PE=1 SV=2 - [NCOA5_HUMAN]	8.94779e+06	1.06003e+07	7.19768e+06	2.82178e+07	4.67642e+07	3.00841e+07	3.92833	0.0119882
Q9NXE8	Pre-mRNA-splicing factor CWC25 homolog OS=Homo sapiens OX=9606 GN=CWC25 PE=1 SV=1 - [CWC25_HUMAN]	7.58701e+06	1.46085e+07	3.05958e+06	6.77458e+06	3.36359e+07	5.89505e+07	3.9343	0.184747
O95239	Chromosome-associated kinesin KIF4A OS=Homo sapiens OX=9606 GN=KIF4A PE=1 SV=3 - [KIF4A_HUMAN]	7.4515e+06	4.75924e+06	5.10897e+06	3.55045e+07	3.15011e+07	3.78188e+07	6.05232	0.000136252
P11177	Pyruvate dehydrogenase E1 component subunit beta, mitochondrial OS=Homo sapiens OX=9606 GN=PDHB PE=1 SV=3 - [ODPB_HUMAN]	6.2287e+06	1.06866e+07	7.61757e+06	1.31659e+07	5.16881e+06	4.23579e+06	0.920009	0.844429
O95155	Ubiquitin conjugation factor E4 B OS=Homo sapiens OX=9606 GN=UBE4B PE=1 SV=1 - [UBE4B_HUMAN]	1.03026e+07	4.57787e+08	9.37407e+08	4.55052e+06	2.06939e+07	2.99842e+07	0.0392947	0.168104
Q9BRX9	WD repeat domain-containing protein 83 OS=Homo sapiens OX=9606 GN=WDR83 PE=1 SV=1 - [WDR83_HUMAN]	7.26736e+06	7.03393e+06	7.08335e+06	1.55553e+07	1.04609e+07	5.12386e+06	1.45619	0.341123
Q12824	SWI/SNF-related matrix-associated actin-dependent regulator of chromatin subfamily B member 1 OS=Homo sapiens OX=9606 GN=SMARCB1 PE=1 SV=2 - [SNF5_HUMAN]	6.57838e+06	6.35165e+06	9.04632e+06	2.90795e+07	1.14441e+07	4.00889e+07	3.66815	0.0802129
P00403	Cytochrome c oxidase subunit 2 OS=Homo sapiens OX=9606 GN=MT-CO2 PE=1 SV=1 - [COX2_HUMAN]	8.87719e+07	3.49382e+07	4.24982e+07	8.12576e+07	5.96327e+07	1.07101e+08	1.49205	0.277608
O94986	Centrosomal protein of 152 kDa OS=Homo sapiens OX=9606 GN=CEP152 PE=1 SV=4 - [CE152_HUMAN]	6.00861e+06	4.95963e+06	3.81011e+06	4.68267e+06	1.25937e+07	6.94287e+06	1.63883	0.26612
Q9UKF6	Cleavage and polyadenylation specificity factor subunit 3 OS=Homo sapiens OX=9606 GN=CPSF3 PE=1 SV=1 - [CPSF3_HUMAN]	1.07565e+07	3.22999e+06	2.91144e+06	5.41366e+07	4.71417e+07	3.88982e+07	8.2955	0.0012842
Q9UPT9	Ubiquitin carboxyl-terminal hydrolase 22 OS=Homo sapiens OX=9606 GN=USP22 PE=1 SV=2 - [UBP22_HUMAN]	1.3616e+07	2.03694e+07	7.59648e+06	3.15711e+07	1.18501e+07	1.25597e+07	1.34628	0.553889
Q96H79	Zinc finger CCCH-type antiviral protein 1-like OS=Homo sapiens OX=9606 GN=ZC3HAV1L PE=1 SV=2 - [ZCCHL_HUMAN]	4.01954e+06	5.25806e+06	3.07894e+06	4.88186e+06	8.71821e+06	5.73992e+06	1.56516	0.153233
Q96DA0	Zymogen granule protein 16 homolog B OS=Homo sapiens OX=9606 GN=ZG16B PE=1 SV=3 - [ZG16B_HUMAN]	8.47099e+06	7.66312e+06	4.28006e+06	1.62192e+07	7.33263e+06	4.39856e+06	1.36917	0.542513
O75152	Zinc finger CCCH domain-containing protein 11A OS=Homo sapiens OX=9606 GN=ZC3H11A PE=1 SV=3 - [ZC11A_HUMAN]	2.47844e+06	9.00905e+08	1.08651e+07	5.90609e+07	1.71069e+08	6.83056e+07	0.326427	0.531723
P01008	Antithrombin-III OS=Homo sapiens OX=9606 GN=SERPINC1 PE=1 SV=1 - [ANT3_HUMAN]	5.82841e+07	6.89525e+07	7.27579e+07	5.42305e+07	7.2647e+07	6.20875e+07	0.944851	0.621037
Q8N999	Uncharacterized protein C12orf29 OS=Homo sapiens OX=9606 GN=C12orf29 PE=1 SV=2 - [CL029_HUMAN]	1.87047e+07	6.70869e+06	9.47438e+06	9.13517e+06	3.93764e+06	3.8222e+07	1.47028	0.652795
P35914	Hydroxymethylglutaryl-CoA lyase, mitochondrial OS=Homo sapiens OX=9606 GN=HMGCL PE=1 SV=2 - [HMGCL_HUMAN]	8.89769e+06	3.03381e+06	3.87724e+06	8.572e+06	9.3024e+07	7.14386e+07	10.9455	0.108019
Q709C8	Vacuolar protein sorting-associated protein 13C OS=Homo sapiens OX=9606 GN=VPS13C PE=1 SV=1 - [VP13C_HUMAN]	9.18215e+06	1.35887e+07	1.85463e+06	4.94032e+07	5.69819e+07	6.35461e+07	6.90063	0.000813053
Q86V81	THO complex subunit 4 OS=Homo sapiens OX=9606 GN=ALYREF PE=1 SV=3 - [THOC4_HUMAN]	3.94939e+06	7.03735e+06	5.22573e+06	2.86275e+07	5.6464e+06	1.57386e+07	3.08482	0.16846
P29692	Elongation factor 1-delta OS=Homo sapiens OX=9606 GN=EEF1D PE=1 SV=5 - [EF1D_HUMAN]	1.46765e+07	6.609e+06	5.66208e+06	5.47641e+06	1.36993e+07	3.26437e+07	1.92297	0.386464
O00170	AH receptor-interacting protein OS=Homo sapiens OX=9606 GN=AIP PE=1 SV=3 - [AIP_HUMAN]	1.1115e+07	6.30559e+06	9.20317e+06	5.40177e+06	8.83317e+06	2.4901e+07	1.46996	0.536158
Q10570	Cleavage and polyadenylation specificity factor subunit 1 OS=Homo sapiens OX=9606 GN=CPSF1 PE=1 SV=2 - [CPSF1_HUMAN]	1.1365e+07	4.84377e+06	3.26964e+06	1.19497e+08	3.94467e+07	3.13682e+07	9.77038	0.113918
P12270	Nucleoprotein TPR OS=Homo sapiens OX=9606 GN=TPR PE=1 SV=3 - [TPR_HUMAN]	4.44607e+06	2.92154e+06	3.12755e+06	5.50523e+07	3.71073e+07	6.32122e+07	14.8041	0.00333865
Q14683	Structural maintenance of chromosomes protein 1A OS=Homo sapiens OX=9606 GN=SMC1A PE=1 SV=2 - [SMC1A_HUMAN]	8.6113e+06	1.16935e+07	3.85794e+06	2.74823e+07	6.62952e+07	3.32857e+07	5.25865	0.0493813
O15381	Nuclear valosin-containing protein-like OS=Homo sapiens OX=9606 GN=NVL PE=1 SV=1 - [NVL_HUMAN]	1.45781e+07	4.78736e+06	4.81766e+06	8.14001e+06	2.21868e+07	1.07639e+07	1.69915	0.355933
Q8WXF0	Serine/arginine-rich splicing factor 12 OS=Homo sapiens OX=9606 GN=SRSF12 PE=2 SV=1 - [SRS12_HUMAN]	1.7292e+07	7.41801e+06	6.53701e+06	2.71491e+07	8.32662e+06	8.76486e+06	1.41583	0.574601
O00487	26S proteasome non-ATPase regulatory subunit 14 OS=Homo sapiens OX=9606 GN=PSMD14 PE=1 SV=1 - [PSDE_HUMAN]	3.55791e+06	2.8072e+06	7.06178e+06	4.12731e+07	7.79815e+06	9.82142e+06	4.38618	0.237342
P51114	Fragile X mental retardation syndrome-related protein 1 OS=Homo sapiens OX=9606 GN=FXR1 PE=1 SV=3 - [FXR1_HUMAN]	1.19433e+07	7.13015e+06	3.74933e+06	3.81876e+07	6.26408e+07	1.12233e+07	4.90964	0.119093
P56270	Myc-associated zinc finger protein OS=Homo sapiens OX=9606 GN=MAZ PE=1 SV=1 - [MAZ_HUMAN]	4.95953e+07	9.39637e+07	9.45386e+07	6.60841e+07	5.79659e+07	5.55545e+07	0.754331	0.269485
P25786	Proteasome subunit alpha type-1 OS=Homo sapiens OX=9606 GN=PSMA1 PE=1 SV=1 - [PSA1_HUMAN]	6.70066e+07	6.20531e+07	4.03761e+07	3.52202e+07	9.08654e+06	9.93921e+06	0.320156	0.0316448
P49916	DNA ligase 3 OS=Homo sapiens OX=9606 GN=LIG3 PE=1 SV=2 - [DNLI3_HUMAN]	8.40782e+06	4.17313e+06	4.0048e+06	4.03901e+07	4.69395e+07	3.32973e+07	7.27292	0.0011675
Q12888	TP53-binding protein 1 OS=Homo sapiens OX=9606 GN=TP53BP1 PE=1 SV=2 - [TP53B_HUMAN]	5.95058e+06	6.34021e+06	2.91305e+06	9.0996e+07	1.38144e+08	1.18171e+08	22.8436	0.00127663
Q687X5	Metalloreductase STEAP4 OS=Homo sapiens OX=9606 GN=STEAP4 PE=1 SV=1 - [STEA4_HUMAN]	1.09825e+07	4.18646e+06	2.15701e+06	1.04616e+07	1.12467e+07	6.89395e+06	1.65083	0.276551
O14964	Hepatocyte growth factor-regulated tyrosine kinase substrate OS=Homo sapiens OX=9606 GN=HGS PE=1 SV=1 - [HGS_HUMAN]	8.76122e+06	8.14227e+06	2.85033e+06	9.11096e+07	1.83258e+08	1.24192e+08	20.1763	0.00949144
P08621	U1 small nuclear ribonucleoprotein 70 kDa OS=Homo sapiens OX=9606 GN=SNRNP70 PE=1 SV=2 - [RU17_HUMAN]	4.18501e+06	1.31951e+07	5.03653e+06	2.54401e+07	2.77811e+07	4.05452e+06	2.55505	0.223647
O75306	NADH dehydrogenase [ubiquinone] iron-sulfur protein 2, mitochondrial OS=Homo sapiens OX=9606 GN=NDUFS2 PE=1 SV=2 - [NDUS2_HUMAN]	1.74497e+07	1.10092e+07	8.25994e+06	2.9003e+07	8.39384e+06	8.25193e+06	1.2432	0.708506
Q9Y230	RuvB-like 2 OS=Homo sapiens OX=9606 GN=RUVBL2 PE=1 SV=3 - [RUVB2_HUMAN]	5.30014e+06	7.01105e+06	3.63739e+07	1.52088e+07	1.42692e+07	1.63173e+07	0.940643	0.928621
Q9ULW3	Activator of basal transcription 1 OS=Homo sapiens OX=9606 GN=ABT1 PE=1 SV=1 - [ABT1_HUMAN]	5.6841e+06	7.23068e+06	4.33049e+06	3.92293e+06	8.56546e+06	9.97164e+06	1.30239	0.436017
Q9H5Q4	Dimethyladenosine transferase 2, mitochondrial OS=Homo sapiens OX=9606 GN=TFB2M PE=1 SV=1 - [TFB2M_HUMAN]	9.27168e+06	7.77817e+06	2.30367e+06	2.33076e+07	5.49962e+06	5.45142e+06	1.77015	0.475103
O43663	Protein regulator of cytokinesis 1 OS=Homo sapiens OX=9606 GN=PRC1 PE=1 SV=2 - [PRC1_HUMAN]	6.10729e+06	4.34583e+06	1.27598e+07	7.86219e+06	1.10344e+07	1.74969e+07	1.56781	0.314288
Q9BXW7	Haloacid dehalogenase-like hydrolase domain-containing 5 OS=Homo sapiens OX=9606 GN=HDHD5 PE=1 SV=1 - [HDHD5_HUMAN]	6.48826e+06	7.02029e+06	1.07163e+07	6.40857e+07	5.84338e+07	8.2512e+07	8.46369	0.00123043
O75764	Transcription elongation factor A protein 3 OS=Homo sapiens OX=9606 GN=TCEA3 PE=1 SV=2 - [TCEA3_HUMAN]	1.47496e+08	1.45859e+08	1.31401e+08	1.4092e+08	1.39511e+08	1.77716e+08	1.07861	0.456375
Q92797	Symplekin OS=Homo sapiens OX=9606 GN=SYMPK PE=1 SV=2 - [SYMPK_HUMAN]	1.44925e+07	7.44428e+06	1.17862e+07	6.0437e+06	2.1205e+07	1.46328e+07	1.24193	0.604613
Q14152	Eukaryotic translation initiation factor 3 subunit A OS=Homo sapiens OX=9606 GN=EIF3A PE=1 SV=1 - [EIF3A_HUMAN]	7.76794e+06	7.08679e+06	1.19466e+07	5.08872e+07	4.49121e+07	6.19972e+07	5.88763	0.00112608
Q9UQ88	Cyclin-dependent kinase 11A OS=Homo sapiens OX=9606 GN=CDK11A PE=1 SV=4 - [CD11A_HUMAN]	6.81319e+06	3.71106e+06	6.93373e+06	2.58113e+07	5.66589e+07	3.41836e+07	6.68198	0.0234415
P46109	Crk-like protein OS=Homo sapiens OX=9606 GN=CRKL PE=1 SV=1 - [CRKL_HUMAN]	8.34396e+06	4.73489e+06	5.01007e+06	6.92268e+06	6.53429e+06	2.17724e+07	1.94757	0.32931
Q8IY67	Ribonucleoprotein PTB-binding 1 OS=Homo sapiens OX=9606 GN=RAVER1 PE=1 SV=1 - [RAVR1_HUMAN]	6.06426e+06	2.93942e+06	3.65009e+06	1.19533e+07	1.30432e+07	7.83608e+06	2.59469	0.0219003
Q14728	Major facilitator superfamily domain-containing protein 10 OS=Homo sapiens OX=9606 GN=MFSD10 PE=1 SV=1 - [MFS10_HUMAN]	7.65728e+06	2.61939e+06	5.62297e+06	8.8534e+06	1.42959e+07	4.18356e+06	1.71909	0.308322
P54136	Arginine--tRNA ligase, cytoplasmic OS=Homo sapiens OX=9606 GN=RARS1 PE=1 SV=2 - [SYRC_HUMAN]	4.34764e+06	5.94894e+06	3.16089e+06	2.74195e+07	2.95448e+07	7.54244e+06	4.79338	0.0733501
P68402	Platelet-activating factor acetylhydrolase IB subunit alpha2 OS=Homo sapiens OX=9606 GN=PAFAH1B2 PE=1 SV=1 - [PA1B2_HUMAN]	7.66152e+06	4.8515e+06	2.74087e+06	9.69628e+06	9.41807e+06	8.153e+06	1.78757	0.0560622
Q96EP5	DAZ-associated protein 1 OS=Homo sapiens OX=9606 GN=DAZAP1 PE=1 SV=1 - [DAZP1_HUMAN]	8.05861e+06	3.65059e+06	7.77063e+06	1.13871e+07	5.45434e+07	5.14833e+07	6.02745	0.07975
P21281	V-type proton ATPase subunit B, brain isoform OS=Homo sapiens OX=9606 GN=ATP6V1B2 PE=1 SV=3 - [VATB2_HUMAN]	7.00765e+06	5.59265e+06	7.24272e+06	8.61488e+06	1.12249e+07	5.83459e+06	1.29387	0.301376
Q9Y3B9	RRP15-like protein OS=Homo sapiens OX=9606 GN=RRP15 PE=1 SV=2 - [RRP15_HUMAN]	7.74267e+06	4.8778e+06	4.80199e+06	7.89973e+07	8.81771e+07	1.24321e+08	16.731	0.00274978
Q14318	Peptidyl-prolyl cis-trans isomerase FKBP8 OS=Homo sapiens OX=9606 GN=FKBP8 PE=1 SV=2 - [FKBP8_HUMAN]	5.62141e+06	4.6529e+06	2.28189e+06	8.10118e+06	5.76733e+07	6.21103e+06	5.73306	0.305605
Q04637	Eukaryotic translation initiation factor 4 gamma 1 OS=Homo sapiens OX=9606 GN=EIF4G1 PE=1 SV=4 - [IF4G1_HUMAN]	1.11791e+07	5.29023e+06	1.16506e+07	2.79181e+07	3.3189e+07	5.02667e+07	3.96067	0.0169992
Q9ULW0	Targeting protein for Xklp2 OS=Homo sapiens OX=9606 GN=TPX2 PE=1 SV=2 - [TPX2_HUMAN]	8.17451e+06	1.15493e+07	1.49113e+07	9.04381e+06	4.53217e+07	5.45925e+07	3.14589	0.152255
P01889	HLA class I histocompatibility antigen, B alpha chain OS=Homo sapiens OX=9606 GN=HLA-B PE=1 SV=3 - [HLAB_HUMAN]	1.03755e+08	1.00533e+08	9.09141e+07	1.11073e+07	7.2476e+07	1.00457e+08	0.623438	0.23702
Q96HC4	PDZ and LIM domain protein 5 OS=Homo sapiens OX=9606 GN=PDLIM5 PE=1 SV=5 - [PDLI5_HUMAN]	2.11551e+07	3.05915e+06	6.74646e+06	2.54718e+07	3.42025e+07	3.85626e+07	3.17296	0.029047
Q15008	26S proteasome non-ATPase regulatory subunit 6 OS=Homo sapiens OX=9606 GN=PSMD6 PE=1 SV=1 - [PSMD6_HUMAN]	6.20371e+06	3.22597e+06	1.08553e+07	6.92412e+06	2.43666e+07	7.29562e+06	1.90221	0.378538
P06396	Gelsolin OS=Homo sapiens OX=9606 GN=GSN PE=1 SV=1 - [GELS_HUMAN]	1.81592e+07	1.25859e+07	4.15322e+06	6.61175e+06	1.39833e+07	9.85278e+06	0.872472	0.763038
Q07666	KH domain-containing, RNA-binding, signal transduction-associated protein 1 OS=Homo sapiens OX=9606 GN=KHDRBS1 PE=1 SV=1 - [KHDR1_HUMAN]	3.47408e+06	1.37879e+07	5.45822e+06	1.06879e+08	5.35135e+07	8.94018e+07	10.9944	0.00914405
Q14573	Inositol 1,4,5-trisphosphate receptor type 3 OS=Homo sapiens OX=9606 GN=ITPR3 PE=1 SV=2 - [ITPR3_HUMAN]	8.40257e+06	2.51408e+06	3.27735e+06	4.62452e+07	2.85028e+07	3.72749e+07	7.89226	0.00390987
Q9Y6K9	NF-kappa-B essential modulator OS=Homo sapiens OX=9606 GN=IKBKG PE=1 SV=2 - [NEMO_HUMAN]	1.67122e+07	1.22485e+07	2.35599e+06	7.21566e+06	1.48031e+07	1.54972e+07	1.19795	0.700756
Q9HAV4	Exportin-5 OS=Homo sapiens OX=9606 GN=XPO5 PE=1 SV=1 - [XPO5_HUMAN]	4.31103e+06	9.68889e+06	6.58933e+06	5.84836e+06	1.77892e+07	1.34873e+07	1.80312	0.222884
Q96KR1	Zinc finger RNA-binding protein OS=Homo sapiens OX=9606 GN=ZFR PE=1 SV=2 - [ZFR_HUMAN]	1.09028e+07	7.16532e+06	7.64349e+06	4.64959e+07	9.10041e+06	6.27899e+06	2.40651	0.406733
Q96ST3	Paired amphipathic helix protein Sin3a OS=Homo sapiens OX=9606 GN=SIN3A PE=1 SV=2 - [SIN3A_HUMAN]	9.15101e+06	3.50577e+06	1.90466e+06	2.99033e+07	1.12045e+08	1.20206e+07	10.5737	0.206758
Q15637	Splicing factor 1 OS=Homo sapiens OX=9606 GN=SF1 PE=1 SV=4 - [SF01_HUMAN]	2.16847e+08	1.07846e+08	8.07971e+07	6.58144e+07	8.12689e+07	5.17337e+07	0.490313	0.179914
Q8IYB3	Serine/arginine repetitive matrix protein 1 OS=Homo sapiens OX=9606 GN=SRRM1 PE=1 SV=2 - [SRRM1_HUMAN]	2.11976e+07	4.44084e+06	6.39583e+06	2.27002e+07	4.44515e+06	9.86372e+06	1.15529	0.8373
P46060	Ran GTPase-activating protein 1 OS=Homo sapiens OX=9606 GN=RANGAP1 PE=1 SV=1 - [RAGP1_HUMAN]	8.68684e+06	3.06e+06	6.99795e+06	2.2e+07	4.67294e+06	8.98134e+06	1.90209	0.360919
P49590	Histidine--tRNA ligase, mitochondrial OS=Homo sapiens OX=9606 GN=HARS2 PE=1 SV=1 - [SYHM_HUMAN]	3.87724e+06	7.06521e+06	3.30427e+06	1.82138e+06	1.10298e+07	9.36145e+06	1.55914	0.435147
Q96SK2	Transmembrane protein 209 OS=Homo sapiens OX=9606 GN=TMEM209 PE=1 SV=2 - [TM209_HUMAN]	7.46287e+06	9.03442e+06	7.38517e+06	3.23486e+07	1.24109e+07	5.99904e+06	2.12535	0.322908
O00299	Chloride intracellular channel protein 1 OS=Homo sapiens OX=9606 GN=CLIC1 PE=1 SV=4 - [CLIC1_HUMAN]	9.04068e+06	1.6583e+07	5.02259e+06	3.41694e+07	2.95223e+07	2.27522e+07	2.8207	0.0171942
Q71RC2	La-related protein 4 OS=Homo sapiens OX=9606 GN=LARP4 PE=1 SV=3 - [LARP4_HUMAN]	1.27739e+07	4.90459e+06	2.39119e+06	1.06925e+07	1.32799e+09	9.1707e+06	67.1587	0.370756
Q8WWQ0	PH-interacting protein OS=Homo sapiens OX=9606 GN=PHIP PE=1 SV=2 - [PHIP_HUMAN]	7.29714e+06	6.42961e+06	4.6198e+06	6.2616e+06	2.64635e+07	4.51556e+07	4.24497	0.152737
O75170	Serine/threonine-protein phosphatase 6 regulatory subunit 2 OS=Homo sapiens OX=9606 GN=PPP6R2 PE=1 SV=2 - [PP6R2_HUMAN]	7.27139e+06	1.13344e+07	5.41076e+06	8.83133e+06	1.83783e+07	5.41264e+06	1.35833	0.537223
Q9BZI7	Regulator of nonsense transcripts 3B OS=Homo sapiens OX=9606 GN=UPF3B PE=1 SV=1 - [REN3B_HUMAN]	4.80232e+06	1.13879e+07	2.73479e+06	1.7659e+07	1.11497e+07	6.72452e+06	1.87758	0.249227
Q9UJU6	Drebrin-like protein OS=Homo sapiens OX=9606 GN=DBNL PE=1 SV=1 - [DBNL_HUMAN]	5.56596e+06	3.25697e+06	9.02565e+06	5.162e+06	2.99634e+07	1.23868e+07	2.66196	0.260621
A8MYJ7	Tetratricopeptide repeat protein 34 OS=Homo sapiens OX=9606 GN=TTC34 PE=2 SV=2 - [TTC34_HUMAN]	1.09521e+07	3.07936e+06	3.65186e+06	8.26567e+06	5.24449e+07	7.89003e+06	3.8794	0.321225
Q02790	Peptidyl-prolyl cis-trans isomerase FKBP4 OS=Homo sapiens OX=9606 GN=FKBP4 PE=1 SV=3 - [FKBP4_HUMAN]	3.87456e+06	6.93517e+06	2.59823e+06	6.20488e+07	3.33019e+07	3.33689e+07	9.60023	0.0163994
Q9Y6J9	TAF6-like RNA polymerase II p300/CBP-associated factor-associated factor 65 kDa subunit 6L OS=Homo sapiens OX=9606 GN=TAF6L PE=1 SV=1 - [TAF6L_HUMAN]	1.54639e+07	7.32908e+06	5.02398e+06	5.69475e+06	5.71095e+06	6.07141e+06	0.62829	0.337901
Q7L7X3	Serine/threonine-protein kinase TAO1 OS=Homo sapiens OX=9606 GN=TAOK1 PE=1 SV=1 - [TAOK1_HUMAN]	1.42031e+07	1.24307e+07	9.05071e+06	5.5973e+06	5.24605e+06	6.01653e+06	0.472471	0.014761
Q8WVV9	Heterogeneous nuclear ribonucleoprotein L-like OS=Homo sapiens OX=9606 GN=HNRNPLL PE=1 SV=1 - [HNRLL_HUMAN]	7.62497e+06	1.3616e+07	4.65129e+06	5.65452e+07	2.85166e+07	9.41985e+07	6.92331	0.0563184
P48059	LIM and senescent cell antigen-like-containing domain protein 1 OS=Homo sapiens OX=9606 GN=LIMS1 PE=1 SV=4 - [LIMS1_HUMAN]	1.17235e+07	1.1606e+08	9.40223e+07	4.09207e+06	6.01361e+06	2.15099e+07	0.142537	0.12054
Q8N4S0	Coiled-coil domain-containing protein 82 OS=Homo sapiens OX=9606 GN=CCDC82 PE=1 SV=2 - [CCD82_HUMAN]	1.00591e+07	1.08742e+07	5.13595e+06	8.7752e+06	6.037e+06	4.41567e+06	0.737569	0.358094
O43824	Putative GTP-binding protein 6 OS=Homo sapiens OX=9606 GN=GTPBP6 PE=1 SV=4 - [GTPB6_HUMAN]	1.07074e+07	8.76608e+06	4.84075e+06	1.43714e+07	1.78832e+07	5.96504e+06	1.57191	0.304059
Q9Y6H3	Mitochondrial inner membrane protease ATP23 homolog OS=Homo sapiens OX=9606 GN=ATP23 PE=1 SV=3 - [ATP23_HUMAN]	4.68852e+06	5.2221e+06	2.46639e+07	2.3285e+07	1.11111e+07	2.45225e+07	1.7041	0.35922
Q9NXR7	BRISC and BRCA1-A complex member 2 OS=Homo sapiens OX=9606 GN=BABAM2 PE=1 SV=2 - [BABA2_HUMAN]	5.30529e+06	1.25658e+07	5.5233e+06	2.74138e+07	3.58483e+07	3.91064e+07	4.37577	0.00337037
Q13283	Ras GTPase-activating protein-binding protein 1 OS=Homo sapiens OX=9606 GN=G3BP1 PE=1 SV=1 - [G3BP1_HUMAN]	6.03616e+06	5.41039e+06	1.02179e+07	3.72413e+07	1.99364e+07	5.03085e+07	4.9614	0.0327308
Q9H8H0	Nucleolar protein 11 OS=Homo sapiens OX=9606 GN=NOL11 PE=1 SV=1 - [NOL11_HUMAN]	6.37635e+06	2.50869e+06	5.28474e+06	7.83755e+07	7.27881e+07	8.34958e+07	16.5606	2.40437e-05
Q9NZL9	Methionine adenosyltransferase 2 subunit beta OS=Homo sapiens OX=9606 GN=MAT2B PE=1 SV=1 - [MAT2B_HUMAN]	9.44487e+06	8.11354e+06	6.02446e+06	2.57291e+07	4.68648e+07	4.57859e+07	5.01974	0.0104142
P61964	WD repeat-containing protein 5 OS=Homo sapiens OX=9606 GN=WDR5 PE=1 SV=1 - [WDR5_HUMAN]	6.26681e+06	6.13486e+06	8.12987e+06	4.5913e+07	7.09402e+07	6.10167e+07	8.66325	0.00199298
Q9UBB4	Ataxin-10 OS=Homo sapiens OX=9606 GN=ATXN10 PE=1 SV=1 - [ATX10_HUMAN]	6.31521e+06	3.30833e+07	3.5238e+06	4.47226e+07	7.18422e+06	1.18337e+07	1.48502	0.669931
Q96JM3	Chromosome alignment-maintaining phosphoprotein 1 OS=Homo sapiens OX=9606 GN=CHAMP1 PE=1 SV=2 - [CHAP1_HUMAN]	5.14308e+06	9.38809e+06	4.09264e+06	3.19785e+07	2.1895e+07	2.98722e+07	4.4967	0.00333515
P08047	Transcription factor Sp1 OS=Homo sapiens OX=9606 GN=SP1 PE=1 SV=3 - [SP1_HUMAN]	1.56147e+07	1.52235e+07	4.64485e+06	1.02128e+08	1.64887e+08	7.09254e+07	9.52398	0.0223871
Q14839	Chromodomain-helicase-DNA-binding protein 4 OS=Homo sapiens OX=9606 GN=CHD4 PE=1 SV=2 - [CHD4_HUMAN]	6.82217e+06	1.1142e+07	8.74241e+06	3.3823e+07	2.52171e+07	1.13863e+07	2.63705	0.093661
P36871	Phosphoglucomutase-1 OS=Homo sapiens OX=9606 GN=PGM1 PE=1 SV=3 - [PGM1_HUMAN]	6.92364e+06	4.46584e+06	6.087e+06	2.46264e+07	7.31487e+06	7.68493e+06	2.2674	0.268826
Q99755	Phosphatidylinositol 4-phosphate 5-kinase type-1 alpha OS=Homo sapiens OX=9606 GN=PIP5K1A PE=1 SV=1 - [PI51A_HUMAN]	2.1391e+07	5.17096e+06	3.29186e+07	1.20164e+07	9.69964e+06	7.09613e+06	0.484396	0.279159
Q14669	E3 ubiquitin-protein ligase TRIP12 OS=Homo sapiens OX=9606 GN=TRIP12 PE=1 SV=1 - [TRIPC_HUMAN]	2.25825e+07	6.51304e+06	6.30734e+06	2.30202e+07	6.7862e+07	4.58876e+07	3.86324	0.0735946
Q9UK61	Protein TASOR OS=Homo sapiens OX=9606 GN=TASOR PE=1 SV=3 - [TASOR_HUMAN]	1.23388e+07	6.56244e+06	3.71904e+06	2.42453e+07	3.40511e+07	1.14393e+07	3.08289	0.0889156
Q9UJT1	Tubulin delta chain OS=Homo sapiens OX=9606 GN=TUBD1 PE=2 SV=2 - [TBD_HUMAN]	2.032e+07	6.88345e+06	5.55325e+06	1.0416e+07	1.48237e+07	9.26783e+06	1.05345	0.912899
Q9UKN8	General transcription factor 3C polypeptide 4 OS=Homo sapiens OX=9606 GN=GTF3C4 PE=1 SV=2 - [TF3C4_HUMAN]	2.099e+07	4.0073e+06	4.63616e+06	8.60713e+06	1.37107e+07	5.03688e+06	0.923102	0.906943
Q9UJK0	18S rRNA aminocarboxypropyltransferase OS=Homo sapiens OX=9606 GN=TSR3 PE=1 SV=1 - [TSR3_HUMAN]	4.49753e+06	4.53258e+06	8.80444e+06	4.30476e+06	1.26892e+07	5.79177e+07	4.20037	0.318484
Q96A33	PAT complex subunit CCDC47 OS=Homo sapiens OX=9606 GN=CCDC47 PE=1 SV=1 - [CCD47_HUMAN]	5.61284e+06	1.29218e+07	2.01885e+06	2.85542e+07	9.43637e+06	8.03073e+06	2.2391	0.312711
P19338	Nucleolin OS=Homo sapiens OX=9606 GN=NCL PE=1 SV=3 - [NUCL_HUMAN]	1.14085e+07	1.41275e+07	4.52222e+06	3.312e+07	8.25765e+06	1.4648e+07	1.86391	0.339251
O95470	Sphingosine-1-phosphate lyase 1 OS=Homo sapiens OX=9606 GN=SGPL1 PE=1 SV=3 - [SGPL1_HUMAN]	7.46805e+06	5.11393e+06	3.51112e+06	9.44422e+06	1.33349e+07	1.24117e+07	2.1867	0.0179078
O43159	Ribosomal RNA-processing protein 8 OS=Homo sapiens OX=9606 GN=RRP8 PE=1 SV=2 - [RRP8_HUMAN]	5.56944e+06	1.14298e+07	3.23874e+06	9.93852e+06	3.60733e+06	2.11565e+07	1.71471	0.443798
Q96JC1	Vam6/Vps39-like protein OS=Homo sapiens OX=9606 GN=VPS39 PE=1 SV=2 - [VPS39_HUMAN]	9.38418e+06	4.10799e+06	3.79929e+06	1.18987e+07	1.82957e+07	8.8706e+06	2.25921	0.0938955
Q16836	Hydroxyacyl-coenzyme A dehydrogenase, mitochondrial OS=Homo sapiens OX=9606 GN=HADH PE=1 SV=3 - [HCDH_HUMAN]	7.7475e+06	6.83874e+06	5.37227e+06	4.61628e+06	7.08188e+06	1.38339e+07	1.27925	0.548799
Q13045	Protein flightless-1 homolog OS=Homo sapiens OX=9606 GN=FLII PE=1 SV=2 - [FLII_HUMAN]	4.47638e+06	4.70577e+06	1.12881e+07	1.71666e+07	2.19421e+07	3.84879e+07	3.7907	0.0495182
O14965	Aurora kinase A OS=Homo sapiens OX=9606 GN=AURKA PE=1 SV=3 - [AURKA_HUMAN]	1.25928e+07	1.09832e+07	7.80734e+06	3.59503e+07	1.35668e+08	4.9458e+07	7.04435	0.113176
O75113	NEDD4-binding protein 1 OS=Homo sapiens OX=9606 GN=N4BP1 PE=1 SV=4 - [N4BP1_HUMAN]	3.7273e+06	6.10644e+06	6.06048e+06	3.86831e+07	4.19742e+07	3.07695e+07	7.01053	0.000737478
O95376	E3 ubiquitin-protein ligase ARIH2 OS=Homo sapiens OX=9606 GN=ARIH2 PE=1 SV=1 - [ARI2_HUMAN]	7.20716e+06	8.54826e+06	7.13113e+06	4.37697e+06	1.04464e+07	9.53896e+06	1.06448	0.812836
Q96G21	U3 small nucleolar ribonucleoprotein protein IMP4 OS=Homo sapiens OX=9606 GN=IMP4 PE=1 SV=1 - [IMP4_HUMAN]	8.9745e+06	4.20129e+06	4.93117e+06	1.31504e+07	5.3085e+07	5.21487e+06	3.94601	0.29829
Q9H1I8	Activating signal cointegrator 1 complex subunit 2 OS=Homo sapiens OX=9606 GN=ASCC2 PE=1 SV=3 - [ASCC2_HUMAN]	1.06143e+07	3.64908e+06	9.74277e+06	2.42806e+07	1.2338e+07	2.77388e+07	2.68087	0.0594437
Q7L576	Cytoplasmic FMR1-interacting protein 1 OS=Homo sapiens OX=9606 GN=CYFIP1 PE=1 SV=1 - [CYFP1_HUMAN]	1.27236e+07	4.43591e+06	1.13249e+07	2.50308e+07	3.29414e+07	3.02598e+07	3.09755	0.0045076
Q8N6R0	eEF1A lysine and N-terminal methyltransferase OS=Homo sapiens OX=9606 GN=METTL13 PE=1 SV=1 - [EFNMT_HUMAN]	6.53734e+07	4.36265e+07	2.79414e+07	7.70611e+07	3.44643e+07	5.32324e+07	1.20313	0.602504
Q13428	Treacle protein OS=Homo sapiens OX=9606 GN=TCOF1 PE=1 SV=3 - [TCOF_HUMAN]	9.2582e+06	3.43624e+06	2.16176e+07	1.0188e+08	1.17917e+08	1.28492e+08	10.1507	0.000372069
Q8TEX9	Importin-4 OS=Homo sapiens OX=9606 GN=IPO4 PE=1 SV=2 - [IPO4_HUMAN]	1.18979e+07	3.88855e+06	8.75697e+06	4.78703e+06	1.52743e+07	2.7104e+07	1.92171	0.333038
Q9P0U3	Sentrin-specific protease 1 OS=Homo sapiens OX=9606 GN=SENP1 PE=1 SV=2 - [SENP1_HUMAN]	1.49786e+07	2.19e+06	1.1176e+07	3.14728e+07	7.88566e+06	1.24686e+07	1.82846	0.391526
Q96FZ2	Abasic site processing protein HMCES OS=Homo sapiens OX=9606 GN=HMCES PE=1 SV=1 - [HMCES_HUMAN]	5.77224e+06	6.18225e+06	7.94546e+06	1.17316e+07	7.36779e+06	6.75442e+06	1.29919	0.308576
Q9H4A4	Aminopeptidase B OS=Homo sapiens OX=9606 GN=RNPEP PE=1 SV=2 - [AMPB_HUMAN]	7.61282e+06	1.14822e+07	5.45104e+06	5.18845e+07	5.85839e+07	9.36404e+06	4.88193	0.11
Q9UQ35	Serine/arginine repetitive matrix protein 2 OS=Homo sapiens OX=9606 GN=SRRM2 PE=1 SV=2 - [SRRM2_HUMAN]	5.96752e+06	5.56211e+06	3.58763e+06	1.32618e+08	5.58208e+07	6.80645e+07	16.9676	0.027888
Q9H4M9	EH domain-containing protein 1 OS=Homo sapiens OX=9606 GN=EHD1 PE=1 SV=2 - [EHD1_HUMAN]	8.85954e+06	1.20347e+07	5.58296e+06	1.47724e+07	1.01558e+07	1.10084e+07	1.35726	0.24927
P46459	Vesicle-fusing ATPase OS=Homo sapiens OX=9606 GN=NSF PE=1 SV=3 - [NSF_HUMAN]	6.37149e+06	8.18414e+06	1.57091e+07	4.17682e+07	9.30581e+06	5.67937e+06	1.87523	0.496713
Q99460	26S proteasome non-ATPase regulatory subunit 1 OS=Homo sapiens OX=9606 GN=PSMD1 PE=1 SV=2 - [PSMD1_HUMAN]	5.09341e+06	7.72819e+06	4.92298e+06	2.73038e+07	3.32534e+07	2.51804e+07	4.83177	0.000927616
Q9Y2T2	AP-3 complex subunit mu-1 OS=Homo sapiens OX=9606 GN=AP3M1 PE=1 SV=1 - [AP3M1_HUMAN]	1.61575e+07	4.78869e+06	1.8554e+06	7.8955e+06	3.94357e+07	1.05176e+07	2.53705	0.348314
Q969S3	Zinc finger protein 622 OS=Homo sapiens OX=9606 GN=ZNF622 PE=1 SV=1 - [ZN622_HUMAN]	2.76683e+06	4.10599e+06	3.94256e+06	7.18024e+06	9.53499e+06	5.89353e+06	2.09043	0.0265697
Q96AX9	E3 ubiquitin-protein ligase MIB2 OS=Homo sapiens OX=9606 GN=MIB2 PE=1 SV=4 - [MIB2_HUMAN]	7.16631e+06	4.90459e+06	5.9787e+06	7.13657e+06	1.00459e+07	3.19099e+07	2.71986	0.257629
Q99623	Prohibitin-2 OS=Homo sapiens OX=9606 GN=PHB2 PE=1 SV=2 - [PHB2_HUMAN]	1.61822e+07	7.52156e+06	1.10114e+07	7.4283e+06	7.46391e+06	6.0416e+06	0.603017	0.147061
Q9NQZ2	Something about silencing protein 10 OS=Homo sapiens OX=9606 GN=UTP3 PE=1 SV=1 - [SAS10_HUMAN]	4.97443e+06	2.66407e+06	7.23319e+06	1.55413e+07	9.2019e+06	8.42824e+06	2.23051	0.0796945
Q8N3V7	Synaptopodin OS=Homo sapiens OX=9606 GN=SYNPO PE=1 SV=2 - [SYNPO_HUMAN]	6.78257e+06	8.88167e+06	1.27988e+07	2.37118e+07	1.14958e+07	2.64103e+07	2.16484	0.0878039
P35590	Tyrosine-protein kinase receptor Tie-1 OS=Homo sapiens OX=9606 GN=TIE1 PE=1 SV=1 - [TIE1_HUMAN]	6.9897e+06	7.65462e+06	9.28905e+06	1.00014e+07	3.96063e+06	8.31682e+06	0.93087	0.788731
O75648	Mitochondrial tRNA-specific 2-thiouridylase 1 OS=Homo sapiens OX=9606 GN=TRMU PE=1 SV=2 - [MTU1_HUMAN]	8.16544e+06	1.26901e+07	3.68798e+06	6.02154e+06	7.97692e+06	2.29661e+07	1.50608	0.524811
Q9H9A6	Leucine-rich repeat-containing protein 40 OS=Homo sapiens OX=9606 GN=LRRC40 PE=1 SV=1 - [LRC40_HUMAN]	7.76794e+06	7.53408e+06	3.91478e+06	7.21316e+06	1.0108e+07	2.82432e+07	2.37107	0.259985
Q02218	2-oxoglutarate dehydrogenase, mitochondrial OS=Homo sapiens OX=9606 GN=OGDH PE=1 SV=3 - [ODO1_HUMAN]	8.77033e+06	2.58655e+06	1.32936e+06	4.24511e+07	1.33164e+07	1.60837e+07	5.66371	0.108233
Q96CW5	Gamma-tubulin complex component 3 OS=Homo sapiens OX=9606 GN=TUBGCP3 PE=1 SV=2 - [GCP3_HUMAN]	6.51891e+06	4.00342e+06	9.36794e+06	8.76972e+06	4.18878e+06	1.5657e+07	1.43867	0.473044
P51553	Isocitrate dehydrogenase [NAD] subunit gamma, mitochondrial OS=Homo sapiens OX=9606 GN=IDH3G PE=1 SV=1 - [IDH3G_HUMAN]	3.58987e+06	4.15697e+06	4.52693e+06	1.44684e+07	8.28517e+06	1.84089e+07	3.35369	0.0312427
Q8NC60	Nitric oxide-associated protein 1 OS=Homo sapiens OX=9606 GN=NOA1 PE=1 SV=2 - [NOA1_HUMAN]	3.89988e+06	4.97581e+06	9.42591e+06	6.10644e+06	5.30566e+06	5.26317e+06	0.911137	0.767544
P51692	Signal transducer and activator of transcription 5B OS=Homo sapiens OX=9606 GN=STAT5B PE=1 SV=2 - [STA5B_HUMAN]	5.49771e+06	4.27295e+06	3.98901e+06	6.2287e+06	4.58526e+07	1.80513e+07	5.09697	0.18512
Q92879	CUGBP Elav-like family member 1 OS=Homo sapiens OX=9606 GN=CELF1 PE=1 SV=2 - [CELF1_HUMAN]	9.98063e+06	1.25215e+07	4.39612e+06	9.74074e+06	1.04863e+07	1.51498e+07	1.31521	0.390346
Q8NEY8	Periphilin-1 OS=Homo sapiens OX=9606 GN=PPHLN1 PE=1 SV=2 - [PPHLN_HUMAN]	1.50327e+07	4.74047e+06	3.3261e+06	5.29831e+06	4.64839e+06	7.06129e+06	0.7363	0.617753
P51116	Fragile X mental retardation syndrome-related protein 2 OS=Homo sapiens OX=9606 GN=FXR2 PE=1 SV=2 - [FXR2_HUMAN]	3.60483e+06	5.35071e+06	4.25344e+06	3.81876e+07	4.73611e+07	1.03283e+07	7.25847	0.0687864
Q9BY42	Replication termination factor 2 OS=Homo sapiens OX=9606 GN=RTF2 PE=1 SV=3 - [RTF2_HUMAN]	3.69207e+06	1.27748e+07	1.00396e+07	1.04558e+07	9.83709e+06	1.2069e+07	1.2209	0.520087
Q13191	E3 ubiquitin-protein ligase CBL-B OS=Homo sapiens OX=9606 GN=CBLB PE=1 SV=2 - [CBLB_HUMAN]	1.35774e+07	1.72872e+07	2.48256e+06	8.52992e+06	3.008e+07	9.48292e+06	1.44219	0.586378
Q9Y5F0	Protocadherin beta-13 OS=Homo sapiens OX=9606 GN=PCDHB13 PE=2 SV=1 - [PCDBD_HUMAN]	9.67949e+06	2.926e+06	2.84678e+06	7.00377e+06	7.65462e+06	9.30903e+06	1.55106	0.2965
P37837	Transaldolase OS=Homo sapiens OX=9606 GN=TALDO1 PE=1 SV=2 - [TALDO_HUMAN]	1.64479e+07	3.69003e+06	3.7193e+06	5.1157e+06	1.1916e+07	5.39316e+06	0.939962	0.925457
Q9Y2S7	Polymerase delta-interacting protein 2 OS=Homo sapiens OX=9606 GN=POLDIP2 PE=1 SV=1 - [PDIP2_HUMAN]	1.33155e+07	7.1882e+06	9.94886e+06	6.00861e+06	6.53565e+06	2.23628e+07	1.14628	0.805703
Q8IYJ1	Copine-9 OS=Homo sapiens OX=9606 GN=CPNE9 PE=1 SV=3 - [CPNE9_HUMAN]	9.83913e+06	3.16002e+06	8.28115e+06	5.04972e+07	2.30522e+07	1.43794e+07	4.13193	0.115232
Q9Y2W1	Thyroid hormone receptor-associated protein 3 OS=Homo sapiens OX=9606 GN=THRAP3 PE=1 SV=2 - [TR150_HUMAN]	8.22892e+07	5.18963e+06	4.12053e+06	6.04484e+07	8.64343e+07	8.33801e+07	2.5138	0.163863
P30291	Wee1-like protein kinase OS=Homo sapiens OX=9606 GN=WEE1 PE=1 SV=2 - [WEE1_HUMAN]	6.51891e+06	9.14531e+06	5.44311e+06	1.05607e+07	9.20636e+06	1.12366e+07	1.46886	0.0577794
Q10713	Mitochondrial-processing peptidase subunit alpha OS=Homo sapiens OX=9606 GN=PMPCA PE=1 SV=2 - [MPPA_HUMAN]	1.87034e+07	8.31336e+06	5.21993e+06	5.27668e+06	7.94216e+06	5.32371e+06	0.5752	0.335357
Q8TCU5	Glutamate receptor ionotropic, NMDA 3A OS=Homo sapiens OX=9606 GN=GRIN3A PE=1 SV=2 - [NMD3A_HUMAN]	1.13477e+07	5.92753e+06	7.18273e+06	7.34841e+06	5.23578e+07	5.97746e+06	2.68557	0.420558
Q4V328	GRIP1-associated protein 1 OS=Homo sapiens OX=9606 GN=GRIPAP1 PE=1 SV=2 - [GRAP1_HUMAN]	1.10198e+07	3.18508e+06	3.08192e+06	1.18452e+07	3.03459e+07	7.33568e+06	2.865	0.225923
P57682	Krueppel-like factor 3 OS=Homo sapiens OX=9606 GN=KLF3 PE=1 SV=1 - [KLF3_HUMAN]	1.089e+07	7.55343e+06	2.60328e+06	7.8301e+06	1.21799e+07	3.27032e+06	1.10613	0.842952
Q6NUQ4	Transmembrane protein 214 OS=Homo sapiens OX=9606 GN=TMEM214 PE=1 SV=2 - [TM214_HUMAN]	8.25136e+06	2.15118e+06	5.90948e+06	1.11706e+07	2.69247e+06	8.53701e+06	1.37322	0.544892
Q9H4I3	TraB domain-containing protein OS=Homo sapiens OX=9606 GN=TRABD PE=1 SV=1 - [TRABD_HUMAN]	1.15773e+07	1.7444e+06	5.83216e+06	9.00628e+06	9.43114e+06	8.28517e+06	1.39515	0.429227
Q8NBF2	NHL repeat-containing protein 2 OS=Homo sapiens OX=9606 GN=NHLRC2 PE=1 SV=1 - [NHLC2_HUMAN]	5.70779e+06	8.52046e+06	3.99178e+06	1.01995e+07	1.36614e+07	1.1242e+07	1.92661	0.0281254
Q8N8A6	ATP-dependent RNA helicase DDX51 OS=Homo sapiens OX=9606 GN=DDX51 PE=1 SV=3 - [DDX51_HUMAN]	5.82005e+06	3.34158e+06	5.56944e+06	5.72125e+06	4.12731e+07	1.61284e+07	4.28501	0.20211
Q53GS7	mRNA export factor GLE1 OS=Homo sapiens OX=9606 GN=GLE1 PE=1 SV=2 - [GLE1_HUMAN]	5.51986e+06	9.56146e+06	6.25249e+06	2.28106e+07	2.60161e+07	2.20947e+07	3.32437	0.000672997
Q6P5Z2	Serine/threonine-protein kinase N3 OS=Homo sapiens OX=9606 GN=PKN3 PE=1 SV=1 - [PKN3_HUMAN]	1.49154e+07	9.55749e+06	3.8414e+06	4.13963e+07	3.10244e+07	1.45377e+07	3.07119	0.0816912
O95394	Phosphoacetylglucosamine mutase OS=Homo sapiens OX=9606 GN=PGM3 PE=1 SV=1 - [AGM1_HUMAN]	1.04972e+07	2.40016e+06	8.95586e+06	3.26346e+07	8.60176e+06	1.27739e+07	2.47151	0.242274
Q9NUU7	ATP-dependent RNA helicase DDX19A OS=Homo sapiens OX=9606 GN=DDX19A PE=1 SV=1 - [DD19A_HUMAN]	9.48555e+06	3.88801e+06	6.66836e+06	4.93391e+06	1.63162e+07	8.30127e+06	1.47448	0.444725
Q9BV86	N-terminal Xaa-Pro-Lys N-methyltransferase 1 OS=Homo sapiens OX=9606 GN=NTMT1 PE=1 SV=3 - [NTM1A_HUMAN]	5.60818e+06	3.44387e+06	3.59111e+06	1.43019e+07	1.63083e+07	1.6253e+07	3.7066	0.000288038
P48730	Casein kinase I isoform delta OS=Homo sapiens OX=9606 GN=CSNK1D PE=1 SV=2 - [KC1D_HUMAN]	1.6037e+07	5.33849e+06	3.19326e+06	1.34109e+07	1.26252e+07	1.40192e+07	1.63033	0.265668
O14617	AP-3 complex subunit delta-1 OS=Homo sapiens OX=9606 GN=AP3D1 PE=1 SV=1 - [AP3D1_HUMAN]	5.17337e+07	7.01446e+06	1.57418e+07	6.84193e+07	1.01389e+07	9.79336e+07	2.36934	0.308966
Q9ULV3	Cip1-interacting zinc finger protein OS=Homo sapiens OX=9606 GN=CIZ1 PE=1 SV=2 - [CIZ1_HUMAN]	3.33718e+06	1.05746e+07	4.286e+06	6.4256e+06	4.4155e+08	1.47417e+07	25.4271	0.360724
Q14739	Delta(14)-sterol reductase LBR OS=Homo sapiens OX=9606 GN=LBR PE=1 SV=2 - [LBR_HUMAN]	8.88968e+06	6.68641e+06	1.17503e+07	9.28841e+06	8.45574e+06	4.06936e+07	2.13851	0.387757
P49406	39S ribosomal protein L19, mitochondrial OS=Homo sapiens OX=9606 GN=MRPL19 PE=1 SV=2 - [RM19_HUMAN]	6.78633e+06	5.37786e+06	7.2936e+06	9.39785e+06	1.12179e+07	8.31624e+06	1.48691	0.036608
Q6UUV7	CREB-regulated transcription coactivator 3 OS=Homo sapiens OX=9606 GN=CRTC3 PE=1 SV=2 - [CRTC3_HUMAN]	8.07315e+06	4.46275e+06	2.88772e+06	6.47209e+06	6.13401e+06	9.33276e+07	6.86828	0.35765
Q13751	Laminin subunit beta-3 OS=Homo sapiens OX=9606 GN=LAMB3 PE=1 SV=1 - [LAMB3_HUMAN]	7.91688e+06	7.66046e+06	8.65679e+06	4.69632e+06	1.91203e+07	1.01889e+07	1.40321	0.482669
Q13492	Phosphatidylinositol-binding clathrin assembly protein OS=Homo sapiens OX=9606 GN=PICALM PE=1 SV=2 - [PICAL_HUMAN]	8.55478e+06	7.4893e+06	6.66466e+06	8.64659e+06	5.76824e+06	4.3709e+06	0.827247	0.394657
Q9H040	DNA-dependent metalloprotease SPRTN OS=Homo sapiens OX=9606 GN=SPRTN PE=1 SV=2 - [SPRTN_HUMAN]	3.50091e+06	6.92508e+06	6.17625e+06	8.07539e+06	8.69347e+06	7.71214e+06	1.47456	0.0715107
Q9H3M7	Thioredoxin-interacting protein OS=Homo sapiens OX=9606 GN=TXNIP PE=1 SV=1 - [TXNIP_HUMAN]	7.08482e+06	6.3069e+06	1.38195e+07	3.03944e+07	7.17725e+06	4.93142e+07	3.19302	0.184401
Q9H0C8	Integrin-linked kinase-associated serine/threonine phosphatase 2C OS=Homo sapiens OX=9606 GN=ILKAP PE=1 SV=1 - [ILKAP_HUMAN]	1.82501e+07	5.06173e+06	4.49316e+06	2.01993e+07	1.75796e+07	8.08267e+06	1.6494	0.358661
Q6P1Q0	LETM1 domain-containing protein 1 OS=Homo sapiens OX=9606 GN=LETMD1 PE=1 SV=1 - [LTMD1_HUMAN]	8.20004e+06	1.38828e+07	1.42563e+07	4.85689e+06	4.79168e+06	7.5765e+06	0.474007	0.042192
Q9GZV1	Ankyrin repeat domain-containing protein 2 OS=Homo sapiens OX=9606 GN=ANKRD2 PE=1 SV=3 - [ANKR2_HUMAN]	6.99455e+06	3.38307e+06	4.49129e+06	8.86814e+06	1.70882e+07	7.69399e+06	2.26314	0.117143
Q9BZZ5	Apoptosis inhibitor 5 OS=Homo sapiens OX=9606 GN=API5 PE=1 SV=3 - [API5_HUMAN]	1.22919e+07	1.42623e+07	3.44698e+06	1.58261e+07	1.31349e+07	6.34549e+06	1.17684	0.705843
Q9P2N7	Kelch-like protein 13 OS=Homo sapiens OX=9606 GN=KLHL13 PE=1 SV=3 - [KLH13_HUMAN]	8.86015e+06	3.34082e+07	1.08531e+07	5.77464e+06	6.55971e+06	5.09164e+06	0.328041	0.205707
Q92626	Peroxidasin homolog OS=Homo sapiens OX=9606 GN=PXDN PE=1 SV=2 - [PXDN_HUMAN]	8.19379e+06	3.8641e+06	7.64826e+06	2.54383e+07	2.35415e+07	1.99862e+07	3.49972	0.00144233
Q14157	Ubiquitin-associated protein 2-like OS=Homo sapiens OX=9606 GN=UBAP2L PE=1 SV=2 - [UBP2L_HUMAN]	1.9033e+07	2.55732e+06	1.40581e+07	2.22654e+07	2.91461e+07	1.19094e+07	1.77626	0.257576
Q9NY61	Protein AATF OS=Homo sapiens OX=9606 GN=AATF PE=1 SV=1 - [AATF_HUMAN]	4.57392e+06	4.34131e+06	8.55834e+06	2.44613e+07	8.16318e+06	3.02577e+07	3.5987	0.088518
P07711	Procathepsin L OS=Homo sapiens OX=9606 GN=CTSL PE=1 SV=2 - [CATL1_HUMAN]	6.34065e+06	1.11119e+07	7.23369e+06	6.20113e+06	5.92876e+06	1.35529e+07	1.04037	0.914173
P20042	Eukaryotic translation initiation factor 2 subunit 2 OS=Homo sapiens OX=9606 GN=EIF2S2 PE=1 SV=2 - [IF2B_HUMAN]	1.77105e+07	9.16434e+06	3.65179e+07	7.24559e+07	7.89809e+07	6.88297e+06	2.49744	0.264423
O94973	AP-2 complex subunit alpha-2 OS=Homo sapiens OX=9606 GN=AP2A2 PE=1 SV=2 - [AP2A2_HUMAN]	4.90391e+06	1.82488e+07	6.60167e+06	1.57626e+07	7.88894e+06	8.87121e+06	1.09304	0.85897
Q9NRZ9	Lymphoid-specific helicase OS=Homo sapiens OX=9606 GN=HELLS PE=1 SV=1 - [HELLS_HUMAN]	6.92989e+06	7.34179e+06	4.20324e+07	9.99379e+06	6.13389e+07	5.96534e+07	2.3264	0.290759
Q96KA5	Cleft lip and palate transmembrane protein 1-like protein OS=Homo sapiens OX=9606 GN=CLPTM1L PE=1 SV=1 - [CLP1L_HUMAN]	4.65355e+06	5.49162e+06	5.75905e+06	8.73393e+06	6.89873e+06	7.89988e+06	1.47964	0.0153538
P13861	cAMP-dependent protein kinase type II-alpha regulatory subunit OS=Homo sapiens OX=9606 GN=PRKAR2A PE=1 SV=2 - [KAP2_HUMAN]	4.1538e+06	1.01368e+07	4.50751e+06	3.4357e+07	7.90646e+06	3.22904e+07	3.96602	0.0998295
Q8IWC1	MAP7 domain-containing protein 3 OS=Homo sapiens OX=9606 GN=MAP7D3 PE=1 SV=2 - [MA7D3_HUMAN]	8.54767e+06	7.16036e+06	3.87986e+07	2.16881e+07	7.81531e+07	8.12689e+07	3.32272	0.126784
Q9BPX3	Condensin complex subunit 3 OS=Homo sapiens OX=9606 GN=NCAPG PE=1 SV=1 - [CND3_HUMAN]	1.90554e+07	8.09893e+06	6.86867e+06	2.28723e+07	2.15502e+07	4.83965e+07	2.72812	0.1096
P30307	M-phase inducer phosphatase 3 OS=Homo sapiens OX=9606 GN=CDC25C PE=1 SV=2 - [MPIP3_HUMAN]	8.93725e+06	4.20216e+06	5.83055e+06	5.70739e+06	7.58175e+06	2.13821e+07	1.82769	0.365612
P55081	Microfibrillar-associated protein 1 OS=Homo sapiens OX=9606 GN=MFAP1 PE=1 SV=2 - [MFAP1_HUMAN]	5.77784e+06	6.14295e+06	4.59872e+06	4.23424e+07	3.18326e+07	5.56519e+06	4.82703	0.126523
P09960	Leukotriene A-4 hydrolase OS=Homo sapiens OX=9606 GN=LTA4H PE=1 SV=2 - [LKHA4_HUMAN]	6.70776e+06	4.01147e+06	4.08074e+06	1.12202e+07	1.15101e+07	8.62265e+06	2.11845	0.0124336
Q6IEG0	U11/U12 small nuclear ribonucleoprotein 48 kDa protein OS=Homo sapiens OX=9606 GN=SNRNP48 PE=1 SV=2 - [SNR48_HUMAN]	2.56922e+06	9.63865e+06	1.26051e+07	3.68765e+07	6.9107e+06	1.60982e+07	2.41348	0.279321
Q9Y2Z4	Tyrosine--tRNA ligase, mitochondrial OS=Homo sapiens OX=9606 GN=YARS2 PE=1 SV=2 - [SYYM_HUMAN]	7.37852e+06	6.28944e+06	3.09106e+07	4.55589e+06	8.22509e+06	2.58937e+07	0.867562	0.858958
Q6P4R8	Nuclear factor related to kappa-B-binding protein OS=Homo sapiens OX=9606 GN=NFRKB PE=1 SV=2 - [NFRKB_HUMAN]	4.26673e+06	3.14167e+06	4.2355e+06	7.27694e+06	4.65613e+06	8.75029e+06	1.77633	0.07399
A8CG34	Nuclear envelope pore membrane protein POM 121C OS=Homo sapiens OX=9606 GN=POM121C PE=1 SV=3 - [P121C_HUMAN]	1.0153e+07	4.3185e+06	5.07227e+06	4.5068e+07	3.90305e+07	2.68911e+06	4.44068	0.168739
Q14790	Caspase-8 OS=Homo sapiens OX=9606 GN=CASP8 PE=1 SV=1 - [CASP8_HUMAN]	2.82452e+07	3.46518e+06	2.33033e+06	2.82751e+06	6.21878e+06	3.87483e+06	0.379579	0.454825
Q08380	Galectin-3-binding protein OS=Homo sapiens OX=9606 GN=LGALS3BP PE=1 SV=1 - [LG3BP_HUMAN]	4.92571e+06	1.22044e+07	5.36817e+06	8.65739e+06	6.4047e+06	8.89893e+06	1.06501	0.854085
Q9Y4P3	Transducin beta-like protein 2 OS=Homo sapiens OX=9606 GN=TBL2 PE=1 SV=1 - [TBL2_HUMAN]	1.10069e+07	6.34065e+06	1.8253e+06	1.83541e+07	3.59852e+07	2.89007e+07	4.34156	0.0207842
Q16891	MICOS complex subunit MIC60 OS=Homo sapiens OX=9606 GN=IMMT PE=1 SV=1 - [MIC60_HUMAN]	1.00222e+07	7.97858e+06	6.79198e+06	2.50013e+07	3.31131e+07	5.78225e+06	2.57723	0.185366
O00154	Cytosolic acyl coenzyme A thioester hydrolase OS=Homo sapiens OX=9606 GN=ACOT7 PE=1 SV=3 - [BACH_HUMAN]	2.57863e+07	1.15661e+07	1.64696e+07	9.07207e+06	1.56428e+07	8.86199e+06	0.623852	0.226607
Q8NBJ5	Procollagen galactosyltransferase 1 OS=Homo sapiens OX=9606 GN=COLGALT1 PE=1 SV=1 - [GT251_HUMAN]	1.41255e+07	4.04217e+06	4.02986e+06	2.38502e+07	1.59583e+07	1.14465e+07	2.30904	0.121715
P36957	Dihydrolipoyllysine-residue succinyltransferase component of 2-oxoglutarate dehydrogenase complex, mitochondrial OS=Homo sapiens OX=9606 GN=DLST PE=1 SV=4 - [ODO2_HUMAN]	1.38243e+07	7.15341e+06	3.76234e+06	1.02293e+07	4.30535e+06	1.38867e+07	1.1488	0.777824
Q9H7D7	WD repeat-containing protein 26 OS=Homo sapiens OX=9606 GN=WDR26 PE=1 SV=3 - [WDR26_HUMAN]	9.00129e+06	4.36757e+06	2.14791e+06	1.31049e+07	1.43108e+07	4.36515e+06	2.04816	0.21953
Q8NDH3	Probable aminopeptidase NPEPL1 OS=Homo sapiens OX=9606 GN=NPEPL1 PE=1 SV=3 - [PEPL1_HUMAN]	6.12891e+06	7.28249e+06	3.86651e+06	4.08661e+07	1.59815e+07	3.05528e+07	5.0585	0.0326744
Q13206	Probable ATP-dependent RNA helicase DDX10 OS=Homo sapiens OX=9606 GN=DDX10 PE=1 SV=2 - [DDX10_HUMAN]	1.43894e+07	7.27795e+06	4.26555e+06	4.07925e+07	1.15613e+07	5.38185e+07	4.09412	0.10584
Q9Y2T3	Guanine deaminase OS=Homo sapiens OX=9606 GN=GDA PE=1 SV=1 - [GUAD_HUMAN]	1.69749e+07	6.60946e+06	7.65568e+06	7.7416e+06	2.9416e+07	8.62684e+06	1.46557	0.568414
Q9P0K7	Ankycorbin OS=Homo sapiens OX=9606 GN=RAI14 PE=1 SV=2 - [RAI14_HUMAN]	1.06696e+07	1.38655e+07	4.08244e+06	2.25106e+07	4.80422e+07	3.49043e+07	3.68505	0.031782
P50416	Carnitine O-palmitoyltransferase 1, liver isoform OS=Homo sapiens OX=9606 GN=CPT1A PE=1 SV=2 - [CPT1A_HUMAN]	6.68502e+06	5.14058e+06	4.54548e+06	5.18773e+07	2.85483e+07	6.41048e+06	5.30424	0.148424
O00232	26S proteasome non-ATPase regulatory subunit 12 OS=Homo sapiens OX=9606 GN=PSMD12 PE=1 SV=3 - [PSD12_HUMAN]	9.75628e+06	5.73316e+06	4.52285e+06	4.88051e+06	1.75796e+07	1.50233e+07	1.87302	0.23673
Q00341	Vigilin OS=Homo sapiens OX=9606 GN=HDLBP PE=1 SV=2 - [VIGLN_HUMAN]	1.37326e+07	4.02959e+06	1.02804e+07	2.71792e+07	5.2639e+06	8.5625e+06	1.46226	0.590111
O60306	RNA helicase aquarius OS=Homo sapiens OX=9606 GN=AQR PE=1 SV=4 - [AQR_HUMAN]	1.15942e+07	6.0773e+06	9.21722e+06	5.80422e+07	5.68438e+07	4.81422e+07	6.06307	0.000205253
Q9UKS6	Protein kinase C and casein kinase substrate in neurons protein 3 OS=Homo sapiens OX=9606 GN=PACSIN3 PE=1 SV=2 - [PACN3_HUMAN]	3.36739e+06	2.94079e+07	7.14202e+06	6.43573e+07	9.02941e+06	9.61863e+06	2.07943	0.513649
Q14451	Growth factor receptor-bound protein 7 OS=Homo sapiens OX=9606 GN=GRB7 PE=1 SV=2 - [GRB7_HUMAN]	1.0127e+07	3.88182e+06	3.38424e+06	1.44483e+07	1.21033e+07	1.04848e+07	2.12939	0.0560125
Q9UL03	Integrator complex subunit 6 OS=Homo sapiens OX=9606 GN=INTS6 PE=1 SV=1 - [INT6_HUMAN]	2.04019e+07	1.72107e+07	7.67162e+06	1.91707e+07	1.57954e+07	1.20949e+07	1.03924	0.897945
O43242	26S proteasome non-ATPase regulatory subunit 3 OS=Homo sapiens OX=9606 GN=PSMD3 PE=1 SV=2 - [PSMD3_HUMAN]	7.65409e+06	5.04492e+06	5.90498e+06	5.88729e+07	6.66558e+06	4.86295e+06	3.78421	0.38522
Q96AC1	Fermitin family homolog 2 OS=Homo sapiens OX=9606 GN=FERMT2 PE=1 SV=1 - [FERM2_HUMAN]	9.82142e+06	3.41558e+06	3.77227e+06	7.53199e+06	2.2584e+07	1.53794e+07	2.67475	0.120047
Q9UQ80	Proliferation-associated protein 2G4 OS=Homo sapiens OX=9606 GN=PA2G4 PE=1 SV=3 - [PA2G4_HUMAN]	7.83173e+06	5.93205e+06	5.66718e+06	5.65894e+06	1.28138e+07	2.04926e+07	2.00532	0.207654
O95340	Bifunctional 3'-phosphoadenosine 5'-phosphosulfate synthase 2 OS=Homo sapiens OX=9606 GN=PAPSS2 PE=1 SV=2 - [PAPS2_HUMAN]	2.07528e+07	6.82548e+06	5.4639e+06	1.23491e+07	8.15922e+06	8.72849e+06	0.884833	0.81435
O75330	Hyaluronan mediated motility receptor OS=Homo sapiens OX=9606 GN=HMMR PE=1 SV=2 - [HMMR_HUMAN]	5.94193e+06	3.31666e+06	2.83471e+07	5.30519e+07	8.72106e+07	1.25484e+07	4.0635	0.170229
Q01650	Large neutral amino acids transporter small subunit 1 OS=Homo sapiens OX=9606 GN=SLC7A5 PE=1 SV=2 - [LAT1_HUMAN]	4.10364e+07	2.26829e+07	4.85318e+06	5.24013e+07	2.80695e+07	3.9063e+07	1.74318	0.248683
Q8WXA9	Splicing regulatory glutamine/lysine-rich protein 1 OS=Homo sapiens OX=9606 GN=SREK1 PE=1 SV=1 - [SREK1_HUMAN]	3.32011e+06	1.19964e+07	3.81513e+06	1.09253e+08	9.97856e+06	7.94216e+06	6.6473	0.343569
Q9Y285	Phenylalanine--tRNA ligase alpha subunit OS=Homo sapiens OX=9606 GN=FARSA PE=1 SV=3 - [SYFA_HUMAN]	3.71253e+07	1.13399e+07	1.87723e+07	5.68331e+06	1.26243e+07	1.61262e+07	0.512122	0.255889
P09622	Dihydrolipoyl dehydrogenase, mitochondrial OS=Homo sapiens OX=9606 GN=DLD PE=1 SV=2 - [DLDH_HUMAN]	5.38308e+06	5.25733e+06	917024	2.25653e+07	1.14108e+07	1.40367e+07	4.15428	0.0297017
Q9BYB4	Guanine nucleotide-binding protein subunit beta-like protein 1 OS=Homo sapiens OX=9606 GN=GNB1L PE=1 SV=2 - [GNB1L_HUMAN]	9.21786e+06	1.40581e+07	1.06703e+07	8.58567e+06	1.70256e+07	1.25197e+07	1.12327	0.64777
P49643	DNA primase large subunit OS=Homo sapiens OX=9606 GN=PRIM2 PE=1 SV=2 - [PRI2_HUMAN]	9.85893e+06	2.8454e+06	1.09483e+07	3.13601e+06	5.74271e+06	1.08772e+07	0.835252	0.722518
Q13228	Methanethiol oxidase OS=Homo sapiens OX=9606 GN=SELENBP1 PE=1 SV=2 - [SBP1_HUMAN]	1.30967e+07	1.22697e+07	1.13792e+07	1.99987e+07	1.04486e+07	6.89921e+06	1.01635	0.961928
Q9UBB9	Tuftelin-interacting protein 11 OS=Homo sapiens OX=9606 GN=TFIP11 PE=1 SV=1 - [TFP11_HUMAN]	6.13444e+06	1.87726e+06	9.88219e+06	1.83465e+07	6.89013e+06	8.87183e+06	1.90615	0.2699
P51530	DNA replication ATP-dependent helicase/nuclease DNA2 OS=Homo sapiens OX=9606 GN=DNA2 PE=1 SV=3 - [DNA2_HUMAN]	9.17578e+06	1.02969e+07	1.69385e+07	1.30913e+07	9.73129e+06	8.19322e+06	0.851822	0.558487
Q92947	Glutaryl-CoA dehydrogenase, mitochondrial OS=Homo sapiens OX=9606 GN=GCDH PE=1 SV=1 - [GCDH_HUMAN]	7.555e+06	6.23086e+06	6.53973e+06	9.16752e+06	6.55017e+06	5.71757e+07	3.58629	0.347102
Q16513	Serine/threonine-protein kinase N2 OS=Homo sapiens OX=9606 GN=PKN2 PE=1 SV=1 - [PKN2_HUMAN]	9.81189e+06	3.08599e+06	4.04582e+06	9.79558e+06	4.0337e+07	5.72721e+06	3.29679	0.308274
P27824	Calnexin OS=Homo sapiens OX=9606 GN=CANX PE=1 SV=2 - [CALX_HUMAN]	5.2526e+06	4.87713e+06	5.38196e+06	7.74789e+07	5.86489e+07	1.11667e+07	9.49571	0.0899652
P55884	Eukaryotic translation initiation factor 3 subunit B OS=Homo sapiens OX=9606 GN=EIF3B PE=1 SV=3 - [EIF3B_HUMAN]	4.36779e+07	1.30704e+07	3.63041e+06	6.19285e+07	5.87802e+06	7.33416e+06	1.24449	0.834367
Q5VZK9	F-actin-uncapping protein LRRC16A OS=Homo sapiens OX=9606 GN=CARMIL1 PE=1 SV=1 - [CARL1_HUMAN]	7.42521e+06	4.58916e+06	3.42293e+06	1.53199e+07	6.89812e+07	1.08689e+07	6.16493	0.228515
Q70YC5	Protein ZNF365 OS=Homo sapiens OX=9606 GN=ZNF365 PE=1 SV=3 - [ZN365_HUMAN]	1.07401e+07	8.57599e+07	1.29442e+07	6.0416e+06	1.21411e+07	5.39578e+06	0.215439	0.311711
Q9UJX2	Cell division cycle protein 23 homolog OS=Homo sapiens OX=9606 GN=CDC23 PE=1 SV=3 - [CDC23_HUMAN]	1.29639e+07	3.87348e+06	7.144e+06	4.42762e+06	1.6332e+07	7.05884e+06	1.16	0.789597
Q8WXF1	Paraspeckle component 1 OS=Homo sapiens OX=9606 GN=PSPC1 PE=1 SV=1 - [PSPC1_HUMAN]	1.11675e+07	7.53199e+06	7.48048e+06	2.56383e+07	2.18708e+07	3.05026e+06	1.93122	0.315768
Q9BXJ9	N-alpha-acetyltransferase 15, NatA auxiliary subunit OS=Homo sapiens OX=9606 GN=NAA15 PE=1 SV=1 - [NAA15_HUMAN]	8.82338e+06	4.80332e+06	9.22425e+06	2.50951e+07	9.74142e+06	1.40241e+07	2.13823	0.14437
Q7Z2K6	Endoplasmic reticulum metallopeptidase 1 OS=Homo sapiens OX=9606 GN=ERMP1 PE=1 SV=2 - [ERMP1_HUMAN]	5.8354e+06	5.81481e+06	9.94197e+06	3.16002e+06	1.27633e+07	7.73838e+06	1.09585	0.834498
O15228	Dihydroxyacetone phosphate acyltransferase OS=Homo sapiens OX=9606 GN=GNPAT PE=1 SV=1 - [GNPAT_HUMAN]	7.65038e+06	2.91851e+06	3.07808e+06	6.289e+06	8.78859e+06	2.79206e+06	1.30942	0.578432
P53992	Protein transport protein Sec24C OS=Homo sapiens OX=9606 GN=SEC24C PE=1 SV=3 - [SC24C_HUMAN]	1.57549e+07	5.11322e+06	1.60514e+07	8.83011e+06	3.72439e+07	3.51641e+07	2.20041	0.207179
Q13188	Serine/threonine-protein kinase 3 OS=Homo sapiens OX=9606 GN=STK3 PE=1 SV=2 - [STK3_HUMAN]	7.78734e+06	2.23462e+06	2.30367e+06	3.62355e+07	9.0683e+06	4.94487e+06	4.07676	0.274278
Q9UQR1	Zinc finger protein 148 OS=Homo sapiens OX=9606 GN=ZNF148 PE=1 SV=2 - [ZN148_HUMAN]	2.62393e+06	2.7159e+06	4.65742e+06	1.02149e+08	1.37019e+08	3.70328e+07	27.6277	0.0388696
P10646	Tissue factor pathway inhibitor OS=Homo sapiens OX=9606 GN=TFPI PE=1 SV=1 - [TFPI1_HUMAN]	1.04413e+07	7.08973e+06	3.73687e+06	8.2846e+06	1.33997e+07	7.43242e+06	1.36904	0.385292
Q9NUW8	Tyrosyl-DNA phosphodiesterase 1 OS=Homo sapiens OX=9606 GN=TDP1 PE=1 SV=2 - [TYDP1_HUMAN]	8.46513e+06	5.14058e+06	1.39426e+07	2.02652e+07	1.14251e+07	1.28976e+07	1.61853	0.20444
P23588	Eukaryotic translation initiation factor 4B OS=Homo sapiens OX=9606 GN=EIF4B PE=1 SV=2 - [IF4B_HUMAN]	3.496e+07	4.78803e+06	9.62711e+07	1.0341e+08	9.35283e+07	9.30563e+07	2.13201	0.131419
P49419	Alpha-aminoadipic semialdehyde dehydrogenase OS=Homo sapiens OX=9606 GN=ALDH7A1 PE=1 SV=5 - [AL7A1_HUMAN]	8.54589e+06	8.90263e+06	1.02073e+07	1.87242e+07	6.23994e+06	1.45307e+07	1.42808	0.346563
Q4G176	Malonate--CoA ligase ACSF3, mitochondrial OS=Homo sapiens OX=9606 GN=ACSF3 PE=1 SV=3 - [ACSF3_HUMAN]	1.40962e+07	8.15639e+06	3.88909e+06	4.95001e+06	3.43713e+07	1.01235e+07	1.89142	0.461185
Q86XP3	ATP-dependent RNA helicase DDX42 OS=Homo sapiens OX=9606 GN=DDX42 PE=1 SV=1 - [DDX42_HUMAN]	9.65069e+06	2.85211e+06	9.72522e+06	1.27863e+07	1e+07	1.15589e+07	1.54513	0.170038
Q96HE7	ERO1-like protein alpha OS=Homo sapiens OX=9606 GN=ERO1A PE=1 SV=2 - [ERO1A_HUMAN]	5.8443e+06	7.52208e+06	6.90639e+06	2.50846e+07	7.98356e+06	2.11331e+07	2.6736	0.0949462
Q8N335	Glycerol-3-phosphate dehydrogenase 1-like protein OS=Homo sapiens OX=9606 GN=GPD1L PE=1 SV=1 - [GPD1L_HUMAN]	1.80701e+07	1.78943e+07	2.04274e+07	7.37187e+06	1.19533e+07	6.01236e+06	0.449312	0.00632271
Q8IWB1	Inositol 1,4,5-trisphosphate receptor-interacting protein OS=Homo sapiens OX=9606 GN=ITPRIP PE=1 SV=1 - [IPRI_HUMAN]	8.22167e+06	6.03993e+06	6.43273e+06	5.032e+06	1.40796e+07	4.91173e+06	1.16086	0.739223
O43295	SLIT-ROBO Rho GTPase-activating protein 3 OS=Homo sapiens OX=9606 GN=SRGAP3 PE=1 SV=3 - [SRGP3_HUMAN]	6.13614e+06	3.45128e+06	5.45595e+06	8.72728e+06	1.31076e+07	3.46975e+06	1.68211	0.303614
Q6WCQ1	Myosin phosphatase Rho-interacting protein OS=Homo sapiens OX=9606 GN=MPRIP PE=1 SV=3 - [MPRIP_HUMAN]	1.25362e+07	1.53369e+07	2.75821e+06	3.0315e+06	1.12701e+07	9.53697e+06	0.778243	0.645813
C9JRZ8	Aldo-keto reductase family 1 member B15 OS=Homo sapiens OX=9606 GN=AKR1B15 PE=1 SV=2 - [AK1BF_HUMAN]	1.3144e+07	3.61735e+06	3.91315e+06	3.20257e+06	7.09072e+06	5.82409e+06	0.779578	0.671974
O95487	Protein transport protein Sec24B OS=Homo sapiens OX=9606 GN=SEC24B PE=1 SV=2 - [SC24B_HUMAN]	5.13168e+06	5.06981e+06	4.66356e+06	5.63858e+06	1.62316e+07	7.66099e+06	1.98662	0.206986
Q15654	Thyroid receptor-interacting protein 6 OS=Homo sapiens OX=9606 GN=TRIP6 PE=1 SV=3 - [TRIP6_HUMAN]	1.05446e+07	9.26462e+06	4.29671e+06	6.73852e+06	9.36859e+06	5.74618e+07	3.0519	0.37673
Q9Y4W6	AFG3-like protein 2 OS=Homo sapiens OX=9606 GN=AFG3L2 PE=1 SV=2 - [AFG32_HUMAN]	9.31549e+06	1.37994e+07	5.50992e+06	7.52208e+06	1.13706e+07	6.30821e+06	0.880386	0.708358
Q9Y2L1	Exosome complex exonuclease RRP44 OS=Homo sapiens OX=9606 GN=DIS3 PE=1 SV=2 - [RRP44_HUMAN]	5.52013e+07	4.02979e+07	2.93651e+07	6.08393e+07	5.59138e+07	5.48923e+07	1.37465	0.113151
Q9Y2K7	Lysine-specific demethylase 2A OS=Homo sapiens OX=9606 GN=KDM2A PE=1 SV=3 - [KDM2A_HUMAN]	5.23298e+06	4.10827e+06	4.33049e+06	3.92149e+07	7.11583e+06	2.92473e+07	5.52805	0.095375
Q13547	Histone deacetylase 1 OS=Homo sapiens OX=9606 GN=HDAC1 PE=1 SV=1 - [HDAC1_HUMAN]	3.67854e+06	5.38868e+06	4.58185e+06	1.0548e+08	1.15131e+08	6.58659e+06	16.6457	0.109435
Q15019	Septin-2 OS=Homo sapiens OX=9606 GN=SEPTIN2 PE=1 SV=1 - [SEPT2_HUMAN]	1.09127e+07	7.51166e+06	2.05328e+06	5.3086e+06	4.28889e+07	5.17167e+06	2.60622	0.440376
Q8NCJ5	SPRY domain-containing protein 3 OS=Homo sapiens OX=9606 GN=SPRYD3 PE=1 SV=2 - [SPRY3_HUMAN]	5.59215e+07	7.24473e+06	3.91118e+07	2.80481e+07	3.92966e+07	8.30357e+06	0.739633	0.627295
Q14142	Tripartite motif-containing protein 14 OS=Homo sapiens OX=9606 GN=TRIM14 PE=1 SV=2 - [TRI14_HUMAN]	9.35366e+06	3.65895e+06	3.97301e+06	4.12568e+06	4.14345e+06	8.31278e+06	0.976232	0.956417
Q5M9Q1	NKAP-like protein OS=Homo sapiens OX=9606 GN=NKAPL PE=1 SV=3 - [NKAPL_HUMAN]	6.92508e+06	1.24255e+07	9.48818e+06	5.59874e+07	8.4084e+06	8.31221e+06	2.52119	0.411253
O00267	Transcription elongation factor SPT5 OS=Homo sapiens OX=9606 GN=SUPT5H PE=1 SV=1 - [SPT5H_HUMAN]	1.06047e+07	5.96669e+06	4.34613e+06	1.40679e+07	4.51345e+06	1.05834e+07	1.39427	0.459571
O75116	Rho-associated protein kinase 2 OS=Homo sapiens OX=9606 GN=ROCK2 PE=1 SV=4 - [ROCK2_HUMAN]	7.29107e+06	8.51869e+06	4.72342e+06	3.73499e+07	2.18556e+07	3.13356e+07	4.4095	0.00737351
Q02086	Transcription factor Sp2 OS=Homo sapiens OX=9606 GN=SP2 PE=1 SV=3 - [SP2_HUMAN]	8.11241e+06	2.14478e+06	4.64614e+06	5.15378e+06	2.3517e+07	8.58508e+06	2.49983	0.274997
Q8WWI1	LIM domain only protein 7 OS=Homo sapiens OX=9606 GN=LMO7 PE=1 SV=3 - [LMO7_HUMAN]	1.14639e+07	2.11771e+07	4.65516e+06	9.84118e+06	2.22469e+07	2.02315e+07	1.40281	0.460816
O95363	Phenylalanine--tRNA ligase, mitochondrial OS=Homo sapiens OX=9606 GN=FARS2 PE=1 SV=1 - [SYFM_HUMAN]	5.10472e+06	5.09694e+06	7.83553e+06	6.15872e+06	1.68005e+07	7.81059e+06	1.70591	0.283604
Q9UER7	Death domain-associated protein 6 OS=Homo sapiens OX=9606 GN=DAXX PE=1 SV=2 - [DAXX_HUMAN]	9.93095e+06	2.36105e+06	4.9834e+06	5.34775e+06	7.90427e+06	7.57335e+06	1.20549	0.64243
Q9UBB5	Methyl-CpG-binding domain protein 2 OS=Homo sapiens OX=9606 GN=MBD2 PE=1 SV=1 - [MBD2_HUMAN]	4.83975e+06	4.53038e+06	2.36892e+06	1.18124e+07	4.2316e+07	1.23388e+07	5.66206	0.145524
Q13867	Bleomycin hydrolase OS=Homo sapiens OX=9606 GN=BLMH PE=1 SV=1 - [BLMH_HUMAN]	4.5675e+07	6.80046e+06	1.07111e+07	4.65023e+07	9.01877e+06	1.00313e+07	1.03744	0.966132
P39656	Dolichyl-diphosphooligosaccharide--protein glycosyltransferase 48 kDa subunit OS=Homo sapiens OX=9606 GN=DDOST PE=1 SV=4 - [OST48_HUMAN]	7.15242e+06	2.16671e+07	3.14008e+07	2.68925e+07	4.04694e+06	2.36822e+07	0.90703	0.861462
Q86VP1	Tax1-binding protein 1 OS=Homo sapiens OX=9606 GN=TAX1BP1 PE=1 SV=2 - [TAXB1_HUMAN]	1.36642e+07	3.5849e+06	5.31265e+06	7.57058e+07	9.66724e+07	7.4004e+07	10.9203	0.000709873
O15091	Mitochondrial ribonuclease P catalytic subunit OS=Homo sapiens OX=9606 GN=PRORP PE=1 SV=2 - [MRPP3_HUMAN]	2.70345e+07	1.16103e+07	6.5488e+06	1.32226e+07	1.39281e+07	1.39195e+07	0.908761	0.834503
Q9BXP5	Serrate RNA effector molecule homolog OS=Homo sapiens OX=9606 GN=SRRT PE=1 SV=1 - [SRRT_HUMAN]	9.13897e+06	7.32349e+06	5.06735e+06	5.27585e+07	6.33262e+07	5.69029e+07	8.0348	0.000105468
P29353	SHC-transforming protein 1 OS=Homo sapiens OX=9606 GN=SHC1 PE=1 SV=4 - [SHC1_HUMAN]	1.12117e+07	6.90782e+06	3.83927e+06	7.14845e+06	6.41714e+06	6.99504e+06	0.936329	0.838977
P31948	Stress-induced-phosphoprotein 1 OS=Homo sapiens OX=9606 GN=STIP1 PE=1 SV=1 - [STIP1_HUMAN]	7.55552e+06	1.19036e+07	3.31344e+06	6.39184e+06	7.99796e+06	3.0264e+07	1.96086	0.418418
Q9UGI8	Testin OS=Homo sapiens OX=9606 GN=TES PE=1 SV=1 - [TES_HUMAN]	1.88714e+07	7.18422e+06	9.07144e+06	8.19663e+06	7.00862e+06	1.72143e+07	0.922921	0.861379
Q9HBB8	Cadherin-related family member 5 OS=Homo sapiens OX=9606 GN=CDHR5 PE=1 SV=3 - [CDHR5_HUMAN]	2.1687e+06	9.2332e+06	3.23515e+06	9.71089e+07	1.05096e+07	1.49869e+07	8.37637	0.271457
Q6P2E9	Enhancer of mRNA-decapping protein 4 OS=Homo sapiens OX=9606 GN=EDC4 PE=1 SV=1 - [EDC4_HUMAN]	9.70569e+06	3.03003e+06	2.41284e+06	8.79756e+07	8.35247e+07	5.24958e+07	14.7866	0.00364015
Q96KG9	N-terminal kinase-like protein OS=Homo sapiens OX=9606 GN=SCYL1 PE=1 SV=1 - [SCYL1_HUMAN]	2.56353e+06	5.38756e+06	2.18773e+06	1.5016e+07	1.32189e+07	5.64366e+06	3.34148	0.0600834
P29350	Tyrosine-protein phosphatase non-receptor type 6 OS=Homo sapiens OX=9606 GN=PTPN6 PE=1 SV=1 - [PTN6_HUMAN]	1.42791e+07	4.06598e+07	4.41987e+07	1.52362e+07	9.40437e+06	5.3652e+06	0.302668	0.0797143
Q7L804	Rab11 family-interacting protein 2 OS=Homo sapiens OX=9606 GN=RAB11FIP2 PE=1 SV=1 - [RFIP2_HUMAN]	6.60167e+06	7.88949e+06	1.00104e+07	1.11806e+07	8.2365e+06	1.48103e+07	1.39695	0.205251
Q14738	Serine/threonine-protein phosphatase 2A 56 kDa regulatory subunit delta isoform OS=Homo sapiens OX=9606 GN=PPP2R5D PE=1 SV=1 - [2A5D_HUMAN]	6.86963e+06	4.23697e+06	9.13454e+06	2.36904e+07	3.83175e+07	5.21596e+06	3.32115	0.18104
Q9BX10	GTP-binding protein 2 OS=Homo sapiens OX=9606 GN=GTPBP2 PE=1 SV=1 - [GTPB2_HUMAN]	6.59755e+06	9.01065e+06	4.05593e+06	9.54756e+06	7.08973e+06	1.7194e+07	1.72046	0.232804
P42696	RNA-binding protein 34 OS=Homo sapiens OX=9606 GN=RBM34 PE=1 SV=2 - [RBM34_HUMAN]	4.1023e+06	2.73328e+06	3.97383e+06	6.65773e+06	4.5679e+06	1.48412e+07	2.41149	0.183351
Q5VT52	Regulation of nuclear pre-mRNA domain-containing protein 2 OS=Homo sapiens OX=9606 GN=RPRD2 PE=1 SV=1 - [RPRD2_HUMAN]	7.54872e+06	9.24153e+06	3.15389e+06	2.47461e+07	2.40511e+07	1.17064e+07	3.03366	0.0426339
P49902	Cytosolic purine 5'-nucleotidase OS=Homo sapiens OX=9606 GN=NT5C2 PE=1 SV=1 - [5NTC_HUMAN]	1.72489e+07	2.3368e+06	2.67035e+06	6.09333e+06	1.02456e+07	1.67447e+07	1.4865	0.568217
O00257	E3 SUMO-protein ligase CBX4 OS=Homo sapiens OX=9606 GN=CBX4 PE=1 SV=3 - [CBX4_HUMAN]	4.16706e+06	1.1075e+07	8.87613e+06	5.85201e+06	6.32485e+06	9.82755e+06	0.912358	0.783021
P55010	Eukaryotic translation initiation factor 5 OS=Homo sapiens OX=9606 GN=EIF5 PE=1 SV=2 - [IF5_HUMAN]	1.34883e+07	7.72605e+06	4.47412e+07	7.69505e+06	6.63976e+06	1.20272e+07	0.399694	0.319354
Q9NWF9	E3 ubiquitin-protein ligase RNF216 OS=Homo sapiens OX=9606 GN=RNF216 PE=1 SV=3 - [RN216_HUMAN]	1.13958e+07	6.45193e+06	3.23649e+06	9.49015e+06	8.2628e+06	7.41595e+06	1.19373	0.607744
Q9Y262	Eukaryotic translation initiation factor 3 subunit L OS=Homo sapiens OX=9606 GN=EIF3L PE=1 SV=1 - [EIF3L_HUMAN]	6.91549e+06	4.10201e+06	4.4612e+06	3.47594e+07	4.02783e+07	3.48898e+07	7.10185	9.93072e-05
Q13111	Chromatin assembly factor 1 subunit A OS=Homo sapiens OX=9606 GN=CHAF1A PE=1 SV=3 - [CAF1A_HUMAN]	1.6134e+07	1.27899e+07	6.64344e+06	6.85345e+06	2.49442e+07	1.1055e+07	1.20483	0.712308
O75150	E3 ubiquitin-protein ligase BRE1B OS=Homo sapiens OX=9606 GN=RNF40 PE=1 SV=5 - [BRE1B_HUMAN]	7.54558e+06	1.08245e+07	5.42955e+06	3.06992e+07	7.80842e+06	2.66425e+06	1.72994	0.544643
Q53G59	Kelch-like protein 12 OS=Homo sapiens OX=9606 GN=KLHL12 PE=1 SV=2 - [KLH12_HUMAN]	4.51721e+06	5.3433e+06	2.90056e+06	5.0683e+07	6.83387e+07	6.21047e+07	14.1937	0.00042401
P48556	26S proteasome non-ATPase regulatory subunit 8 OS=Homo sapiens OX=9606 GN=PSMD8 PE=1 SV=2 - [PSMD8_HUMAN]	1.01333e+07	4.62621e+06	6.72033e+06	2.08421e+07	8.81727e+06	2.06767e+07	2.34341	0.0885315
Q9Y2E5	Epididymis-specific alpha-mannosidase OS=Homo sapiens OX=9606 GN=MAN2B2 PE=1 SV=4 - [MA2B2_HUMAN]	5.89271e+06	1.50867e+08	4.23961e+06	1.34612e+07	6.70823e+06	9.12947e+06	0.181982	0.417824
P17980	26S proteasome regulatory subunit 6A OS=Homo sapiens OX=9606 GN=PSMC3 PE=1 SV=3 - [PRS6A_HUMAN]	4.72899e+06	6.16129e+06	4.59394e+06	2.59422e+07	7.71535e+06	1.63264e+07	3.22806	0.095312
Q13888	General transcription factor IIH subunit 2 OS=Homo sapiens OX=9606 GN=GTF2H2 PE=1 SV=1 - [TF2H2_HUMAN]	9.41546e+06	4.75561e+06	6.27159e+06	5.40326e+06	7.66577e+06	1.88819e+07	1.56295	0.431289
Q14807	Kinesin-like protein KIF22 OS=Homo sapiens OX=9606 GN=KIF22 PE=1 SV=5 - [KIF22_HUMAN]	1.00375e+07	4.8643e+06	4.88118e+06	5.61557e+06	2.6491e+07	5.52598e+06	1.90227	0.454038
Q86U86	Protein polybromo-1 OS=Homo sapiens OX=9606 GN=PBRM1 PE=1 SV=1 - [PB1_HUMAN]	6.19941e+06	9.70368e+06	3.35993e+06	3.71536e+07	1.52573e+07	8.95834e+06	3.18586	0.183536
Q9NQW7	Xaa-Pro aminopeptidase 1 OS=Homo sapiens OX=9606 GN=XPNPEP1 PE=1 SV=3 - [XPP1_HUMAN]	8.18925e+06	6.08152e+06	4.18327e+06	7.24573e+06	1.29057e+07	9.28776e+06	1.59527	0.143967
Q8WUQ7	Cactin OS=Homo sapiens OX=9606 GN=CACTIN PE=1 SV=3 - [CATIN_HUMAN]	6.84064e+06	2.34393e+06	4.50595e+06	1.50296e+07	1.03599e+07	1.01256e+07	2.59413	0.0241336
Q16539	Mitogen-activated protein kinase 14 OS=Homo sapiens OX=9606 GN=MAPK14 PE=1 SV=3 - [MK14_HUMAN]	4.72571e+06	3.71775e+06	7.85729e+06	5.07931e+06	1.34072e+07	9.13074e+06	1.69423	0.236077
Q9NZW5	Protein PALS2 OS=Homo sapiens OX=9606 GN=PALS2 PE=1 SV=2 - [PALS2_HUMAN]	8.65139e+06	7.38415e+06	3.55693e+06	3.67566e+07	1.5708e+07	1.3436e+07	3.36357	0.111402
Q05932	Folylpolyglutamate synthase, mitochondrial OS=Homo sapiens OX=9606 GN=FPGS PE=1 SV=3 - [FOLC_HUMAN]	5.43143e+06	7.15589e+06	2.08812e+07	1.00842e+07	9.83709e+06	1.74364e+07	1.11621	0.824826
Q6UWE0	E3 ubiquitin-protein ligase LRSAM1 OS=Homo sapiens OX=9606 GN=LRSAM1 PE=1 SV=1 - [LRSM1_HUMAN]	2.18697e+06	3.57472e+06	8.73938e+06	4.37181e+06	3.25742e+06	1.55251e+07	1.59673	0.547458
Q5VZE5	N-alpha-acetyltransferase 35, NatC auxiliary subunit OS=Homo sapiens OX=9606 GN=NAA35 PE=1 SV=1 - [NAA35_HUMAN]	2.6458e+07	4.55652e+06	3.0922e+06	5.6179e+06	1.66983e+07	1.16264e+07	0.995189	0.995002
Q5VTL8	Pre-mRNA-splicing factor 38B OS=Homo sapiens OX=9606 GN=PRPF38B PE=1 SV=1 - [PR38B_HUMAN]	9.65671e+06	3.40447e+06	3.44459e+06	9.89502e+07	1.32453e+08	6.04484e+07	17.6818	0.0117806
Q9UQ16	Dynamin-3 OS=Homo sapiens OX=9606 GN=DNM3 PE=1 SV=4 - [DYN3_HUMAN]	1.81127e+07	2.26503e+06	3.67293e+06	1.92626e+07	8.36306e+06	1.46115e+07	1.75617	0.367183
P28715	DNA excision repair protein ERCC-5 OS=Homo sapiens OX=9606 GN=ERCC5 PE=1 SV=3 - [ERCC5_HUMAN]	7.15887e+06	8.77885e+06	5.3359e+06	1.50817e+07	6.00819e+06	6.88679e+06	1.31509	0.505164
Q9Y2W2	WW domain-binding protein 11 OS=Homo sapiens OX=9606 GN=WBP11 PE=1 SV=1 - [WBP11_HUMAN]	9.54623e+06	7.10745e+06	7.17725e+06	6.16043e+06	7.00717e+06	6.54653e+06	0.82725	0.176891
P78368	Casein kinase I isoform gamma-2 OS=Homo sapiens OX=9606 GN=CSNK1G2 PE=1 SV=1 - [KC1G2_HUMAN]	2.34584e+07	7.14449e+06	5.7157e+06	4.86295e+06	1.76174e+07	2.27395e+07	1.24509	0.722551
Q9BV44	THUMP domain-containing protein 3 OS=Homo sapiens OX=9606 GN=THUMPD3 PE=1 SV=1 - [THUM3_HUMAN]	1.4934e+07	1.40893e+07	1.2972e+07	5.44991e+06	5.26426e+06	5.9956e+07	1.68281	0.62738
Q9ULX6	A-kinase anchor protein 8-like OS=Homo sapiens OX=9606 GN=AKAP8L PE=1 SV=4 - [AKP8L_HUMAN]	8.6694e+06	6.04328e+06	9.44225e+06	5.38009e+06	9.76034e+06	3.27713e+06	0.762476	0.427739
Q8TDB6	E3 ubiquitin-protein ligase DTX3L OS=Homo sapiens OX=9606 GN=DTX3L PE=1 SV=1 - [DTX3L_HUMAN]	3.28236e+06	7.80301e+06	5.49809e+06	4.54381e+07	3.8283e+07	4.91606e+07	8.01291	0.000356614
Q96IR7	4-hydroxyphenylpyruvate dioxygenase-like protein OS=Homo sapiens OX=9606 GN=HPDL PE=1 SV=1 - [HPDL_HUMAN]	1.01734e+07	6.18011e+06	5.10755e+06	7.81601e+06	8.99755e+06	1.76517e+07	1.60594	0.278804
Q01780	Exosome component 10 OS=Homo sapiens OX=9606 GN=EXOSC10 PE=1 SV=2 - [EXOSX_HUMAN]	7.76255e+06	6.83022e+06	9.90757e+06	4.86589e+07	6.65345e+07	6.43171e+07	7.32686	0.000820181
Q5JPB2	Zinc finger protein 831 OS=Homo sapiens OX=9606 GN=ZNF831 PE=2 SV=4 - [ZN831_HUMAN]	2.34779e+07	5.50725e+06	6.87629e+06	5.47565e+06	1.2163e+07	5.15914e+06	0.63572	0.521862
Q9Y2P8	RNA 3'-terminal phosphate cyclase-like protein OS=Homo sapiens OX=9606 GN=RCL1 PE=1 SV=3 - [RCL1_HUMAN]	9.6193e+06	4.11369e+06	1.73761e+07	4.36628e+07	5.81763e+06	4.45246e+07	3.02179	0.190829
Q01844	RNA-binding protein EWS OS=Homo sapiens OX=9606 GN=EWSR1 PE=1 SV=1 - [EWS_HUMAN]	3.40849e+06	9.17006e+06	9.2794e+06	1.44041e+08	8.34784e+07	8.24148e+07	14.1795	0.00935318
Q9UN72	Protocadherin alpha-7 OS=Homo sapiens OX=9606 GN=PCDHA7 PE=2 SV=1 - [PCDA7_HUMAN]	1.10275e+07	4.63456e+06	5.46807e+06	5.47869e+06	1.50126e+08	1.19607e+07	7.93018	0.359628
Q9BSG1	Zinc finger protein 2 OS=Homo sapiens OX=9606 GN=ZNF2 PE=1 SV=5 - [ZNF2_HUMAN]	6.37282e+06	5.21849e+06	6.52841e+06	6.44478e+06	1.96475e+09	1.10727e+07	109.398	0.372115
Q9Y575	Ankyrin repeat and SOCS box protein 3 OS=Homo sapiens OX=9606 GN=ASB3 PE=1 SV=1 - [ASB3_HUMAN]	6.37017e+06	5.05087e+06	4.37757e+06	4.22787e+06	1.32565e+07	1.11281e+07	1.81108	0.200164
Q9BUK6	Protein misato homolog 1 OS=Homo sapiens OX=9606 GN=MSTO1 PE=1 SV=1 - [MSTO1_HUMAN]	2.43755e+06	1.15213e+07	4.62012e+06	7.01432e+07	1.08681e+07	1.43128e+07	5.13075	0.257804
Q9UBD5	Origin recognition complex subunit 3 OS=Homo sapiens OX=9606 GN=ORC3 PE=1 SV=1 - [ORC3_HUMAN]	1.69855e+07	5.91727e+06	4.13885e+06	2.63981e+06	5.225e+06	5.70067e+06	0.501652	0.337865
P01023	Alpha-2-macroglobulin OS=Homo sapiens OX=9606 GN=A2M PE=1 SV=3 - [A2MG_HUMAN]	7.33721e+06	3.40093e+06	6.26464e+06	2.54348e+07	1.52923e+07	3.33203e+07	4.35502	0.0236877
P35606	Coatomer subunit beta' OS=Homo sapiens OX=9606 GN=COPB2 PE=1 SV=2 - [COPB2_HUMAN]	6.4488e+06	1.22655e+07	4.73227e+06	1.09346e+07	1.47162e+07	4.91275e+06	1.30354	0.551473
Q9NSV4	Protein diaphanous homolog 3 OS=Homo sapiens OX=9606 GN=DIAPH3 PE=1 SV=4 - [DIAP3_HUMAN]	8.60593e+06	6.21447e+06	4.30326e+06	2.98914e+06	2.09101e+07	3.16171e+07	2.90302	0.224153
Q96I24	Far upstream element-binding protein 3 OS=Homo sapiens OX=9606 GN=FUBP3 PE=1 SV=2 - [FUBP3_HUMAN]	8.86261e+06	2.98583e+06	4.16706e+06	2.75166e+07	1.34537e+07	3.33372e+06	2.76632	0.262585
O94766	Galactosylgalactosylxylosylprotein 3-beta-glucuronosyltransferase 3 OS=Homo sapiens OX=9606 GN=B3GAT3 PE=1 SV=2 - [B3GA3_HUMAN]	5.22174e+06	3.42934e+06	2.73872e+07	1.77843e+07	8.34511e+06	4.49098e+06	0.849662	0.844952
Q29RF7	Sister chromatid cohesion protein PDS5 homolog A OS=Homo sapiens OX=9606 GN=PDS5A PE=1 SV=1 - [PDS5A_HUMAN]	5.60701e+06	6.6827e+06	6.42827e+06	2.0701e+07	1.11985e+07	5.19313e+07	4.47862	0.1526
Q8IY18	Structural maintenance of chromosomes protein 5 OS=Homo sapiens OX=9606 GN=SMC5 PE=1 SV=2 - [SMC5_HUMAN]	1.17202e+07	1.94923e+07	5.97166e+06	3.67719e+07	8.49275e+06	6.13742e+06	1.38236	0.677759
Q3LXA3	Triokinase/FMN cyclase OS=Homo sapiens OX=9606 GN=TKFC PE=1 SV=2 - [TKFC_HUMAN]	5.5942e+06	4.08187e+06	5.98077e+06	3.4269e+07	1.78844e+07	4.42547e+06	3.61368	0.189868
Q9Y6I3	Epsin-1 OS=Homo sapiens OX=9606 GN=EPN1 PE=1 SV=2 - [EPN1_HUMAN]	1.58942e+07	6.246e+06	1.07676e+07	9.30065e+06	8.53346e+06	1.05257e+10	320.396	0.374153
P24928	DNA-directed RNA polymerase II subunit RPB1 OS=Homo sapiens OX=9606 GN=POLR2A PE=1 SV=2 - [RPB1_HUMAN]	4.00786e+06	4.10372e+06	2.37595e+07	2.0368e+07	2.03257e+07	3.05697e+07	2.23599	0.150631
Q9P2B7	Cilia- and flagella-associated protein 97 OS=Homo sapiens OX=9606 GN=CFAP97 PE=1 SV=2 - [CFA97_HUMAN]	5.25041e+06	4.80932e+06	2.26483e+07	5.11251e+06	8.68865e+06	8.52519e+06	0.682595	0.594339
Q8TEW8	Partitioning defective 3 homolog B OS=Homo sapiens OX=9606 GN=PARD3B PE=1 SV=2 - [PAR3L_HUMAN]	3.6384e+07	6.07015e+06	5.08988e+06	6.53747e+06	7.35299e+06	9.96888e+06	0.501837	0.487062
Q5JTV8	Torsin-1A-interacting protein 1 OS=Homo sapiens OX=9606 GN=TOR1AIP1 PE=1 SV=2 - [TOIP1_HUMAN]	9.74209e+06	7.60702e+06	3.97631e+06	1.7225e+07	1.20556e+07	7.86764e+06	1.74197	0.173263
Q13895	Bystin OS=Homo sapiens OX=9606 GN=BYSL PE=1 SV=3 - [BYST_HUMAN]	5.88047e+06	3.9708e+06	4.72899e+06	3.40087e+07	1.6374e+07	5.3842e+06	3.82482	0.17571
Q7Z569	BRCA1-associated protein OS=Homo sapiens OX=9606 GN=BRAP PE=1 SV=2 - [BRAP_HUMAN]	3.98431e+06	4.1853e+06	4.98306e+06	2.59351e+07	8.23079e+06	3.95096e+07	5.60156	0.0899543
Q13576	Ras GTPase-activating-like protein IQGAP2 OS=Homo sapiens OX=9606 GN=IQGAP2 PE=1 SV=4 - [IQGA2_HUMAN]	1.24347e+08	1.03045e+08	1.50916e+09	1.45216e+07	7.22653e+07	8.4663e+06	0.0548519	0.305185
P12955	Xaa-Pro dipeptidase OS=Homo sapiens OX=9606 GN=PEPD PE=1 SV=3 - [PEPD_HUMAN]	1.33877e+07	2.33858e+06	2.53262e+06	5.06068e+06	4.22955e+07	3.94357e+07	4.75341	0.141828
O94874	E3 UFM1-protein ligase 1 OS=Homo sapiens OX=9606 GN=UFL1 PE=1 SV=2 - [UFL1_HUMAN]	6.83116e+06	5.42616e+06	5.02468e+06	6.58887e+06	2.36937e+07	9.13454e+06	2.28082	0.240409
Q8N2K0	Lysophosphatidylserine lipase ABHD12 OS=Homo sapiens OX=9606 GN=ABHD12 PE=1 SV=2 - [ABD12_HUMAN]	1.64525e+07	3.39199e+06	6.39095e+06	4.30297e+06	1.13674e+07	1.15613e+07	1.03797	0.946094
Q13835	Plakophilin-1 OS=Homo sapiens OX=9606 GN=PKP1 PE=1 SV=2 - [PKP1_HUMAN]	2.03454e+07	6.80564e+06	3.54192e+06	6.17668e+06	4.65355e+06	1.18888e+07	0.740203	0.659563
Q68CZ2	Tensin-3 OS=Homo sapiens OX=9606 GN=TNS3 PE=1 SV=2 - [TENS3_HUMAN]	4.59044e+06	1.50431e+07	5.58606e+06	1.62215e+07	1.29039e+07	1.07706e+07	1.58194	0.255448
Q86X95	Corepressor interacting with RBPJ 1 OS=Homo sapiens OX=9606 GN=CIR1 PE=1 SV=1 - [CIR1_HUMAN]	1.22109e+08	8.31665e+07	1.17387e+08	1.22406e+08	1.04418e+08	7.85822e+07	0.946518	0.761122
Q05397	Focal adhesion kinase 1 OS=Homo sapiens OX=9606 GN=PTK2 PE=1 SV=2 - [FAK1_HUMAN]	7.94877e+06	1.46429e+07	2.2984e+06	4.38517e+06	7.00183e+06	6.39539e+06	0.714436	0.552111
P47712	Cytosolic phospholipase A2 OS=Homo sapiens OX=9606 GN=PLA2G4A PE=1 SV=2 - [PA24A_HUMAN]	2.67401e+07	1.43894e+07	2.65393e+06	6.70438e+07	7.70398e+07	7.4431e+07	4.99081	0.00153573
O75925	E3 SUMO-protein ligase PIAS1 OS=Homo sapiens OX=9606 GN=PIAS1 PE=1 SV=2 - [PIAS1_HUMAN]	6.86487e+06	6.24426e+06	8.35553e+06	3.69156e+06	1.22893e+07	1.6681e+07	1.52166	0.388972
Q9HCS7	Pre-mRNA-splicing factor SYF1 OS=Homo sapiens OX=9606 GN=XAB2 PE=1 SV=2 - [SYF1_HUMAN]	1.11451e+07	5.61323e+06	4.68787e+06	6.12764e+06	1.17487e+07	4.8822e+06	1.0612	0.888149
O60825	6-phosphofructo-2-kinase/fructose-2,6-bisphosphatase 2 OS=Homo sapiens OX=9606 GN=PFKFB2 PE=1 SV=2 - [F262_HUMAN]	2.70889e+07	7.24222e+06	1.85245e+06	6.92748e+06	1.64422e+07	1.03821e+07	0.932794	0.925664
P10588	Nuclear receptor subfamily 2 group F member 6 OS=Homo sapiens OX=9606 GN=NR2F6 PE=1 SV=2 - [NR2F6_HUMAN]	2.92493e+07	5.97249e+06	1.22434e+07	1.0385e+07	6.46223e+06	8.19947e+06	0.527686	0.348648
P16885	1-phosphatidylinositol 4,5-bisphosphate phosphodiesterase gamma-2 OS=Homo sapiens OX=9606 GN=PLCG2 PE=1 SV=4 - [PLCG2_HUMAN]	2.62134e+07	6.32222e+06	5.33812e+06	9.60397e+06	1.13469e+07	8.66759e+06	0.782033	0.708253
Q13112	Chromatin assembly factor 1 subunit B OS=Homo sapiens OX=9606 GN=CHAF1B PE=1 SV=1 - [CAF1B_HUMAN]	2.43987e+07	1.10911e+07	3.04392e+06	5.52522e+06	2.89729e+07	1.04478e+07	1.16641	0.832537
Q53GL7	Protein mono-ADP-ribosyltransferase PARP10 OS=Homo sapiens OX=9606 GN=PARP10 PE=1 SV=2 - [PAR10_HUMAN]	1.56993e+07	8.39675e+06	5.18783e+06	6.76051e+06	2.1317e+07	1.06718e+07	1.32323	0.586863
Q5SNT2	Transmembrane protein 201 OS=Homo sapiens OX=9606 GN=TMEM201 PE=1 SV=1 - [TM201_HUMAN]	6.10983e+06	8.99193e+06	2.69285e+06	1.07662e+07	1.31915e+07	4.36325e+07	3.79835	0.196788
P14373	Zinc finger protein RFP OS=Homo sapiens OX=9606 GN=TRIM27 PE=1 SV=1 - [TRI27_HUMAN]	6.25639e+06	5.2308e+06	5.84917e+06	1.12998e+07	5.20548e+06	6.66004e+06	1.33623	0.355553
Q6P3W7	SCY1-like protein 2 OS=Homo sapiens OX=9606 GN=SCYL2 PE=1 SV=1 - [SCYL2_HUMAN]	6.65266e+06	4.20362e+06	145192	1.20916e+07	1.35407e+07	6.41937e+06	2.9134	0.0718054
O76094	Signal recognition particle subunit SRP72 OS=Homo sapiens OX=9606 GN=SRP72 PE=1 SV=3 - [SRP72_HUMAN]	3.05682e+06	4.68485e+07	6.2218e+06	1.04689e+07	1.00063e+07	1.97261e+07	0.716252	0.731954
Q8TCX5	Rhophilin-1 OS=Homo sapiens OX=9606 GN=RHPN1 PE=1 SV=2 - [RHPN1_HUMAN]	1.95921e+08	1.4971e+08	1.28465e+08	7.15738e+06	8.17791e+06	8.88106e+06	0.0510789	0.00166677
Q14554	Protein disulfide-isomerase A5 OS=Homo sapiens OX=9606 GN=PDIA5 PE=1 SV=1 - [PDIA5_HUMAN]	5.90498e+06	1.71511e+07	7.12965e+06	1.13234e+07	9.55351e+06	5.9374e+06	0.888309	0.78748
Q9P2I0	Cleavage and polyadenylation specificity factor subunit 2 OS=Homo sapiens OX=9606 GN=CPSF2 PE=1 SV=2 - [CPSF2_HUMAN]	7.2382e+06	2.926e+06	8.22281e+06	1.18616e+07	6.37193e+06	6.63838e+06	1.35269	0.421597
Q8TD30	Alanine aminotransferase 2 OS=Homo sapiens OX=9606 GN=GPT2 PE=1 SV=1 - [ALAT2_HUMAN]	7.79977e+06	6.16812e+06	1.11234e+07	1.01903e+07	8.35495e+06	6.38653e+06	0.993643	0.978158
Q7Z4Q2	HEAT repeat-containing protein 3 OS=Homo sapiens OX=9606 GN=HEATR3 PE=1 SV=2 - [HEAT3_HUMAN]	1.04362e+07	2.93001e+07	2.06523e+07	5.76065e+06	1.45811e+07	5.52588e+07	1.2519	0.76977
P02765	Alpha-2-HS-glycoprotein OS=Homo sapiens OX=9606 GN=AHSG PE=1 SV=2 - [FETUA_HUMAN]	7.4386e+06	1.14132e+07	8.95151e+06	3.9917e+07	7.37085e+06	1.70032e+07	2.31235	0.279089
O60508	Pre-mRNA-processing factor 17 OS=Homo sapiens OX=9606 GN=CDC40 PE=1 SV=1 - [PRP17_HUMAN]	1.67865e+07	3.95022e+06	1.2218e+07	7.144e+06	1.07096e+07	9.35172e+06	0.825537	0.648682
A0AVT1	Ubiquitin-like modifier-activating enzyme 6 OS=Homo sapiens OX=9606 GN=UBA6 PE=1 SV=1 - [UBA6_HUMAN]	1.21605e+07	9.00905e+08	4.58122e+06	2.38184e+08	3.50855e+08	7.04809e+06	0.649582	0.750207
P55084	Trifunctional enzyme subunit beta, mitochondrial OS=Homo sapiens OX=9606 GN=HADHB PE=1 SV=3 - [ECHB_HUMAN]	5.12102e+06	4.72866e+06	4.60765e+06	4.72333e+07	1.25484e+07	7.57755e+06	4.65917	0.230347
Q96I59	Probable asparagine--tRNA ligase, mitochondrial OS=Homo sapiens OX=9606 GN=NARS2 PE=1 SV=3 - [SYNM_HUMAN]	3.88343e+06	5.17275e+06	4.06606e+06	8.51456e+06	9.95093e+06	1.17569e+07	2.30314	0.00504496
O60678	Protein arginine N-methyltransferase 3 OS=Homo sapiens OX=9606 GN=PRMT3 PE=1 SV=4 - [ANM3_HUMAN]	1.66106e+07	2.53209e+06	6.72732e+06	2.56917e+07	6.3231e+06	9.69426e+06	1.61226	0.508869
Q8NF37	Lysophosphatidylcholine acyltransferase 1 OS=Homo sapiens OX=9606 GN=LPCAT1 PE=1 SV=2 - [PCAT1_HUMAN]	4.09491e+06	6.02321e+06	1.37679e+07	2.74709e+07	1.12693e+07	1.13926e+07	2.09884	0.227217
Q9NNW5	WD repeat-containing protein 6 OS=Homo sapiens OX=9606 GN=WDR6 PE=1 SV=1 - [WDR6_HUMAN]	8.55716e+06	8.75393e+06	1.11026e+07	1.05256e+07	1.95708e+07	1.05008e+07	1.42879	0.263968
Q6IQ32	Activity-dependent neuroprotector homeobox protein 2 OS=Homo sapiens OX=9606 GN=ADNP2 PE=1 SV=1 - [ADNP2_HUMAN]	1.12889e+07	1.31958e+08	3.97852e+06	9.0388e+06	9.03316e+06	7.29815e+06	0.172322	0.38311
O60934	Nibrin OS=Homo sapiens OX=9606 GN=NBN PE=1 SV=1 - [NBN_HUMAN]	7.62655e+06	1.1891e+08	4.4677e+06	9.2019e+06	6.43853e+06	1.50564e+08	1.26869	0.856073
Q4ZG55	Protein GREB1 OS=Homo sapiens OX=9606 GN=GREB1 PE=2 SV=1 - [GREB1_HUMAN]	7.66684e+06	3.72214e+06	4.89677e+06	614861	1.22748e+07	1.56342e+07	1.75146	0.434292
Q06124	Tyrosine-protein phosphatase non-receptor type 11 OS=Homo sapiens OX=9606 GN=PTPN11 PE=1 SV=3 - [PTN11_HUMAN]	5.85931e+06	9.16053e+06	1.61038e+07	7.23319e+06	3.099e+07	1.01551e+07	1.55439	0.515198
P49959	Double-strand break repair protein MRE11 OS=Homo sapiens OX=9606 GN=MRE11 PE=1 SV=3 - [MRE11_HUMAN]	1.88348e+07	5.32666e+06	5.35925e+06	1.76908e+07	2.23846e+07	4.42241e+06	1.50734	0.515751
Q9BZF9	Uveal autoantigen with coiled-coil domains and ankyrin repeats OS=Homo sapiens OX=9606 GN=UACA PE=1 SV=2 - [UACA_HUMAN]	1.14631e+07	1.25996e+08	1.1189e+08	9.65002e+06	7.84027e+07	1.01127e+08	0.758698	0.681146
Q6NZY4	Zinc finger CCHC domain-containing protein 8 OS=Homo sapiens OX=9606 GN=ZCCHC8 PE=1 SV=2 - [ZCHC8_HUMAN]	5.80032e+06	6.84017e+06	6.81603e+06	2.01587e+07	8.35032e+06	3.89934e+06	1.66568	0.424843
O75153	Clustered mitochondria protein homolog OS=Homo sapiens OX=9606 GN=CLUH PE=1 SV=2 - [CLU_HUMAN]	7.82142e+06	1.22604e+07	2.28676e+07	2.82178e+07	4.08916e+07	2.59063e+07	2.21227	0.0546438
P28288	ATP-binding cassette sub-family D member 3 OS=Homo sapiens OX=9606 GN=ABCD3 PE=1 SV=1 - [ABCD3_HUMAN]	1.38857e+07	4.36878e+06	2.14995e+07	9.10419e+06	8.23422e+06	7.21666e+06	0.617675	0.366981
P10398	Serine/threonine-protein kinase A-Raf OS=Homo sapiens OX=9606 GN=ARAF PE=1 SV=2 - [ARAF_HUMAN]	6.11237e+06	6.85155e+06	3.34668e+06	4.45965e+06	1.37079e+07	9.34977e+06	1.68708	0.263843
Q9UHI6	Probable ATP-dependent RNA helicase DDX20 OS=Homo sapiens OX=9606 GN=DDX20 PE=1 SV=2 - [DDX20_HUMAN]	1.06807e+07	1.26708e+07	3.97246e+06	5.2861e+07	9.16434e+06	6.48197e+06	2.50723	0.419229
Q9NS91	E3 ubiquitin-protein ligase RAD18 OS=Homo sapiens OX=9606 GN=RAD18 PE=1 SV=2 - [RAD18_HUMAN]	5.95595e+06	7.71054e+06	1.06356e+07	7.75986e+06	1.21109e+07	3.74847e+07	2.3601	0.304795
O94875	Sorbin and SH3 domain-containing protein 2 OS=Homo sapiens OX=9606 GN=SORBS2 PE=1 SV=3 - [SRBS2_HUMAN]	2.74049e+06	7.48775e+06	1.01734e+07	7.63699e+07	3.37387e+07	2.60671e+06	5.52481	0.225437
Q13131	5'-AMP-activated protein kinase catalytic subunit alpha-1 OS=Homo sapiens OX=9606 GN=PRKAA1 PE=1 SV=4 - [AAPK1_HUMAN]	1.08365e+07	3.2008e+06	3.87859e+06	6.73185e+07	1.56472e+07	6.72439e+07	8.38414	0.0642007
O00418	Eukaryotic elongation factor 2 kinase OS=Homo sapiens OX=9606 GN=EEF2K PE=1 SV=2 - [EF2K_HUMAN]	9.33229e+06	6.20758e+06	5.96545e+06	4.08216e+06	1.01305e+07	1.88924e+07	1.53939	0.432391
Q9HCE1	Helicase MOV-10 OS=Homo sapiens OX=9606 GN=MOV10 PE=1 SV=2 - [MOV10_HUMAN]	4.34312e+06	8.18017e+06	6.05502e+06	6.50402e+06	1.10229e+07	5.27559e+06	1.22737	0.533703
Q12894	Interferon-related developmental regulator 2 OS=Homo sapiens OX=9606 GN=IFRD2 PE=1 SV=3 - [IFRD2_HUMAN]	7.08875e+06	3.42673e+06	4.18965e+06	3.10911e+07	6.90017e+06	2.11756e+07	4.02355	0.105456
Q9HCG8	Pre-mRNA-splicing factor CWC22 homolog OS=Homo sapiens OX=9606 GN=CWC22 PE=1 SV=3 - [CWC22_HUMAN]	9.1358e+06	4.61468e+06	1.26561e+06	2.0607e+06	8.60295e+06	1.53135e+07	1.72995	0.458094
Q16650	T-box brain protein 1 OS=Homo sapiens OX=9606 GN=TBR1 PE=1 SV=1 - [TBR1_HUMAN]	8.10848e+06	2.82242e+06	8.40141e+06	9.62597e+06	1.02428e+07	4.84905e+07	3.53601	0.276498
P29144	Tripeptidyl-peptidase 2 OS=Homo sapiens OX=9606 GN=TPP2 PE=1 SV=4 - [TPP2_HUMAN]	1.37803e+07	3.08577e+06	2.47038e+06	5.46012e+06	1.67493e+07	4.35971e+06	1.37405	0.67835
O75691	Small subunit processome component 20 homolog OS=Homo sapiens OX=9606 GN=UTP20 PE=1 SV=3 - [UTP20_HUMAN]	7.84858e+06	8.36538e+06	9.37054e+06	1.83249e+07	1.91415e+07	1.38617e+07	2.00622	0.0072516
P18206	Vinculin OS=Homo sapiens OX=9606 GN=VCL PE=1 SV=4 - [VINC_HUMAN]	6.96021e+06	7.65568e+06	4.75957e+06	1.27677e+07	1.65313e+07	3.51965e+06	1.69383	0.321382
Q92616	eIF-2-alpha kinase activator GCN1 OS=Homo sapiens OX=9606 GN=GCN1 PE=1 SV=7 - [GCN1_HUMAN]	7.18322e+06	4.01787e+06	3.20213e+06	2.08205e+07	2.84002e+07	2.98598e+07	5.49047	0.00212249
P49591	Serine--tRNA ligase, cytoplasmic OS=Homo sapiens OX=9606 GN=SARS1 PE=1 SV=3 - [SYSC_HUMAN]	1.03757e+07	4.84277e+06	9.15165e+06	5.27878e+07	2.72792e+07	6.62413e+06	3.55728	0.197505
P38432	Coilin OS=Homo sapiens OX=9606 GN=COIL PE=1 SV=1 - [COIL_HUMAN]	6.12382e+06	7.04223e+06	6.55017e+06	7.53811e+07	7.65554e+07	5.60807e+07	10.5506	0.000699791
Q8TD19	Serine/threonine-protein kinase Nek9 OS=Homo sapiens OX=9606 GN=NEK9 PE=1 SV=2 - [NEK9_HUMAN]	6.0007e+06	7.59543e+06	5.25624e+06	1.59196e+07	4.31641e+06	6.50853e+06	1.41863	0.508236
O60518	Ran-binding protein 6 OS=Homo sapiens OX=9606 GN=RANBP6 PE=1 SV=2 - [RNBP6_HUMAN]	1.25293e+07	8.9224e+06	1.27051e+07	3.98838e+07	5.14797e+07	6.7188e+07	4.64188	0.00661343
Q13618	Cullin-3 OS=Homo sapiens OX=9606 GN=CUL3 PE=1 SV=2 - [CUL3_HUMAN]	1.22519e+07	5.68292e+06	9.38288e+06	1.13627e+07	1.77486e+07	8.673e+06	1.38314	0.349407
Q14671	Pumilio homolog 1 OS=Homo sapiens OX=9606 GN=PUM1 PE=1 SV=3 - [PUM1_HUMAN]	4.97064e+06	3.64049e+06	8.62026e+06	1.3345e+07	3.79771e+06	7.61018e+06	1.4365	0.470471
Q9GZX5	Zinc finger protein 350 OS=Homo sapiens OX=9606 GN=ZNF350 PE=1 SV=3 - [ZN350_HUMAN]	2.79226e+06	6.51718e+09	9.42983e+06	8.71156e+06	1.31112e+07	1.35943e+07	0.00542425	0.375029
Q8N1G2	Cap-specific mRNA (nucleoside-2'-O-)-methyltransferase 1 OS=Homo sapiens OX=9606 GN=CMTR1 PE=1 SV=1 - [CMTR1_HUMAN]	5.34627e+06	9.13834e+06	1.89948e+07	9.12884e+06	7.69345e+06	5.75546e+06	0.674378	0.43405
Q99829	Copine-1 OS=Homo sapiens OX=9606 GN=CPNE1 PE=1 SV=1 - [CPNE1_HUMAN]	8.69889e+06	1.21352e+07	1.84706e+06	2.43311e+07	3.78248e+06	8.64839e+06	1.62081	0.533577
Q9BTW9	Tubulin-specific chaperone D OS=Homo sapiens OX=9606 GN=TBCD PE=1 SV=2 - [TBCD_HUMAN]	1.33719e+07	5.72562e+06	5.46352e+06	9.6213e+06	1.16943e+07	4.36636e+06	1.04564	0.917512
Q14574	Desmocollin-3 OS=Homo sapiens OX=9606 GN=DSC3 PE=1 SV=3 - [DSC3_HUMAN]	1.01805e+07	2.08913e+07	3.97962e+06	8.12761e+06	5.98699e+06	9.2473e+06	0.666504	0.48189
Q5TA45	Integrator complex subunit 11 OS=Homo sapiens OX=9606 GN=INTS11 PE=1 SV=2 - [INT11_HUMAN]	6.90208e+06	3.56878e+06	5.39092e+06	2.3504e+07	1.38291e+07	1.75894e+07	3.46256	0.0119236
Q13425	Beta-2-syntrophin OS=Homo sapiens OX=9606 GN=SNTB2 PE=1 SV=1 - [SNTB2_HUMAN]	7.66471e+06	4.47049e+06	4.78106e+06	1.24833e+07	7.08826e+06	2.09261e+07	2.39401	0.131353
P28290	Protein ITPRID2 OS=Homo sapiens OX=9606 GN=ITPRID2 PE=1 SV=3 - [ITPI2_HUMAN]	4.71459e+06	6.12254e+06	2.57564e+06	3.16258e+07	1.80076e+07	4.1448e+07	6.79065	0.019667
Q86TJ2	Transcriptional adapter 2-beta OS=Homo sapiens OX=9606 GN=TADA2B PE=1 SV=2 - [TAD2B_HUMAN]	5.69413e+08	3.01077e+06	2.18658e+08	7.98395e+07	9.06686e+07	7.93155e+07	0.3158	0.335865
Q9H223	EH domain-containing protein 4 OS=Homo sapiens OX=9606 GN=EHD4 PE=1 SV=1 - [EHD4_HUMAN]	1.27651e+07	3.66657e+06	5.3678e+06	7.91907e+06	7.75341e+06	5.27146e+07	3.1371	0.365211
Q7Z5M8	Protein ABHD12B OS=Homo sapiens OX=9606 GN=ABHD12B PE=1 SV=1 - [AB12B_HUMAN]	6.84776e+06	2.87693e+06	1.45539e+07	1.81416e+07	1.50817e+07	6.64562e+07	4.10566	0.213096
A8MPP1	Putative ATP-dependent RNA helicase DDX11-like protein 8 OS=Homo sapiens OX=9606 GN=DDX11L8 PE=1 SV=1 - [D11L8_HUMAN]	6.87153e+06	1.10336e+07	6.69522e+06	4.34703e+06	9.11367e+06	1.9406e+07	1.33603	0.586449
Q9H501	ESF1 homolog OS=Homo sapiens OX=9606 GN=ESF1 PE=1 SV=1 - [ESF1_HUMAN]	1.99723e+07	2.50209e+06	6.90495e+06	6.07773e+06	1.81052e+07	9.342e+06	1.1411	0.838561
Q63HN8	E3 ubiquitin-protein ligase RNF213 OS=Homo sapiens OX=9606 GN=RNF213 PE=1 SV=3 - [RN213_HUMAN]	1.11312e+07	6.45852e+07	6.79891e+07	3.36663e+07	2.10148e+07	3.27094e+07	0.608122	0.375812
Q9H8V3	Protein ECT2 OS=Homo sapiens OX=9606 GN=ECT2 PE=1 SV=4 - [ECT2_HUMAN]	6.02446e+06	5.42315e+06	4.00647e+06	1.58656e+07	1.13422e+07	9.07773e+06	2.34796	0.0290119
Q96T17	MAP7 domain-containing protein 2 OS=Homo sapiens OX=9606 GN=MAP7D2 PE=1 SV=2 - [MA7D2_HUMAN]	1.48422e+07	6.02947e+06	7.99629e+06	2.95351e+06	1.61094e+07	4.60159e+06	0.81975	0.742482
A0FGR8	Extended synaptotagmin-2 OS=Homo sapiens OX=9606 GN=ESYT2 PE=1 SV=1 - [ESYT2_HUMAN]	1.43098e+07	3.17055e+06	8.60295e+06	1.15197e+07	2.29979e+07	9.00316e+06	1.66853	0.340389
Q99549	M-phase phosphoprotein 8 OS=Homo sapiens OX=9606 GN=MPHOSPH8 PE=1 SV=2 - [MPP8_HUMAN]	6.68363e+06	5.33183e+06	3.64832e+06	2.43463e+07	1.88348e+07	1.50421e+07	3.71706	0.00751793
Q92698	DNA repair and recombination protein RAD54-like OS=Homo sapiens OX=9606 GN=RAD54L PE=1 SV=2 - [RAD54_HUMAN]	6.63746e+06	9.15418e+06	2.09406e+07	4.14546e+06	7.86873e+06	1.57593e+07	0.756106	0.621014
Q9HB63	Netrin-4 OS=Homo sapiens OX=9606 GN=NTN4 PE=1 SV=2 - [NET4_HUMAN]	1.34581e+08	4.68364e+06	4.65774e+06	5.56211e+06	1.25763e+07	5.2026e+06	0.162177	0.406503
Q13427	Peptidyl-prolyl cis-trans isomerase G OS=Homo sapiens OX=9606 GN=PPIG PE=1 SV=2 - [PPIG_HUMAN]	1.55326e+07	1.88849e+06	2.99744e+06	8.88537e+06	4.54885e+07	5.43132e+07	5.32295	0.113736
Q14956	Transmembrane glycoprotein NMB OS=Homo sapiens OX=9606 GN=GPNMB PE=1 SV=2 - [GPNMB_HUMAN]	1.63725e+08	2.0589e+08	1.94339e+08	1.50679e+08	6.16941e+06	1.42077e+08	0.530052	0.142399
O95235	Kinesin-like protein KIF20A OS=Homo sapiens OX=9606 GN=KIF20A PE=1 SV=1 - [KI20A_HUMAN]	9.32195e+06	7.41955e+06	1.03541e+07	1.2064e+07	4.70862e+07	4.77941e+06	2.35941	0.401263
Q96GM8	Target of EGR1 protein 1 OS=Homo sapiens OX=9606 GN=TOE1 PE=1 SV=1 - [TOE1_HUMAN]	5.25406e+06	2.78221e+06	1.04667e+07	2.52224e+07	1.96088e+07	1.57517e+07	3.27423	0.0169947
Q9H269	Vacuolar protein sorting-associated protein 16 homolog OS=Homo sapiens OX=9606 GN=VPS16 PE=1 SV=2 - [VPS16_HUMAN]	9.49213e+06	1.429e+07	8.50748e+06	3.88828e+06	1.6797e+07	5.18028e+06	0.80105	0.657361
P28838	Cytosol aminopeptidase OS=Homo sapiens OX=9606 GN=LAP3 PE=1 SV=3 - [AMPL_HUMAN]	8.21768e+06	9.7104e+06	7.57335e+06	6.66004e+06	7.16781e+06	1.1599e+07	0.997076	0.98898
Q6PCB5	Lysine-specific demethylase RSBN1L OS=Homo sapiens OX=9606 GN=RSBN1L PE=1 SV=2 - [RSBNL_HUMAN]	5.65687e+07	2.12079e+07	3.57441e+07	5.361e+07	3.63487e+07	1.38185e+07	0.914171	0.843553
Q9H8H2	Probable ATP-dependent RNA helicase DDX31 OS=Homo sapiens OX=9606 GN=DDX31 PE=1 SV=2 - [DDX31_HUMAN]	2.31114e+07	3.30794e+06	4.59617e+06	4.06429e+07	8.71277e+06	8.63042e+06	1.86959	0.50954
P19447	General transcription and DNA repair factor IIH helicase subunit XPB OS=Homo sapiens OX=9606 GN=ERCC3 PE=1 SV=1 - [ERCC3_HUMAN]	9.20317e+06	1.00884e+07	5.33331e+06	2.25653e+07	1.68787e+07	1.12506e+07	2.05867	0.0720687
Q96RL1	BRCA1-A complex subunit RAP80 OS=Homo sapiens OX=9606 GN=UIMC1 PE=1 SV=2 - [UIMC1_HUMAN]	1.03634e+07	9.80509e+06	6.00486e+06	2.16086e+07	3.50935e+07	3.16324e+07	3.37497	0.00831777
P23786	Carnitine O-palmitoyltransferase 2, mitochondrial OS=Homo sapiens OX=9606 GN=CPT2 PE=1 SV=2 - [CPT2_HUMAN]	2.81129e+06	8.21768e+06	5.98741e+06	6.91118e+06	1.26672e+07	4.72866e+06	1.42845	0.440425
Q6SZW1	NAD(+) hydrolase SARM1 OS=Homo sapiens OX=9606 GN=SARM1 PE=1 SV=1 - [SARM1_HUMAN]	6.46985e+06	2.72137e+06	6.11491e+06	1.02869e+07	4.2502e+06	1.05344e+07	1.638	0.242688
Q05682	Caldesmon OS=Homo sapiens OX=9606 GN=CALD1 PE=1 SV=3 - [CALD1_HUMAN]	8.07595e+06	3.34923e+06	5.42955e+06	5.40851e+06	4.36749e+07	4.09037e+06	3.15483	0.406163
Q8TC57	Meiosis 1 arrest protein OS=Homo sapiens OX=9606 GN=M1AP PE=1 SV=1 - [M1AP_HUMAN]	1.60023e+08	1.41595e+08	7.20866e+06	1.24459e+08	8.64959e+06	1.10865e+07	0.466914	0.422475
Q92547	DNA topoisomerase 2-binding protein 1 OS=Homo sapiens OX=9606 GN=TOPBP1 PE=1 SV=3 - [TOPB1_HUMAN]	1.26813e+07	4.38061e+06	7.0701e+06	7.71856e+06	6.24383e+06	1.08591e+07	1.02857	0.938492
Q8IZ83	Aldehyde dehydrogenase family 16 member A1 OS=Homo sapiens OX=9606 GN=ALDH16A1 PE=1 SV=2 - [A16A1_HUMAN]	1.20381e+07	1.3046e+07	8.74666e+06	5.47603e+06	8.32143e+06	7.05102e+06	0.61626	0.0480504
P13798	Acylamino-acid-releasing enzyme OS=Homo sapiens OX=9606 GN=APEH PE=1 SV=4 - [ACPH_HUMAN]	1.57113e+07	4.07114e+06	3.24593e+06	1.04223e+08	1.30865e+08	1.23369e+08	15.5659	0.000230491
Q9H0H0	Integrator complex subunit 2 OS=Homo sapiens OX=9606 GN=INTS2 PE=1 SV=2 - [INT2_HUMAN]	1.42494e+07	4.43223e+06	1.0309e+07	5.96214e+06	2.60076e+06	5.49581e+06	0.48494	0.176904
P42338	Phosphatidylinositol 4,5-bisphosphate 3-kinase catalytic subunit beta isoform OS=Homo sapiens OX=9606 GN=PIK3CB PE=1 SV=1 - [PK3CB_HUMAN]	6.76613e+06	6.36973e+06	4.79799e+06	7.1892e+06	9.1358e+06	7.37954e+06	1.32178	0.0897603
Q9BQ70	Transcription factor 25 OS=Homo sapiens OX=9606 GN=TCF25 PE=1 SV=1 - [TCF25_HUMAN]	6.00486e+06	4.5581e+06	7.41081e+06	5.37339e+06	5.74191e+06	7.09613e+06	1.01322	0.939207
Q96TA1	Protein Niban 2 OS=Homo sapiens OX=9606 GN=NIBAN2 PE=1 SV=3 - [NIBA2_HUMAN]	1.23705e+07	5.26171e+06	7.32654e+06	3.62003e+07	4.14517e+06	1.03742e+07	2.03214	0.440501
Q14966	Zinc finger protein 638 OS=Homo sapiens OX=9606 GN=ZNF638 PE=1 SV=2 - [ZN638_HUMAN]	3.10594e+06	1.46128e+06	2.20967e+06	3.89502e+06	8.4411e+06	2.51944e+07	5.53801	0.189572
Q15788	Nuclear receptor coactivator 1 OS=Homo sapiens OX=9606 GN=NCOA1 PE=1 SV=3 - [NCOA1_HUMAN]	1.07639e+07	2.17117e+08	7.87006e+08	7.70825e+07	4.46938e+08	5.77882e+08	1.08574	0.921462
Q9BVQ7	Spermatogenesis-associated protein 5-like protein 1 OS=Homo sapiens OX=9606 GN=SPATA5L1 PE=1 SV=2 - [SPA5L_HUMAN]	1.94666e+07	1.00042e+07	4.64839e+06	1.52722e+07	3.59328e+07	7.45564e+06	1.71928	0.43932
O43776	Asparagine--tRNA ligase, cytoplasmic OS=Homo sapiens OX=9606 GN=NARS1 PE=1 SV=1 - [SYNC_HUMAN]	6.13486e+06	8.08659e+06	4.50751e+06	3.45337e+07	9.43375e+06	2.47959e+07	3.6715	0.0866598
Q13360	Zinc finger protein 177 OS=Homo sapiens OX=9606 GN=ZNF177 PE=1 SV=4 - [ZN177_HUMAN]	7.03637e+06	5.18136e+06	1.17605e+09	8.69467e+06	7.73623e+06	7.11287e+06	0.0198136	0.37582
Q96LX7	Coiled-coil domain-containing protein 17 OS=Homo sapiens OX=9606 GN=CCDC17 PE=1 SV=2 - [CCD17_HUMAN]	8.48569e+06	2.72156e+06	3.27281e+06	9.8603e+06	7.25629e+06	5.5444e+06	1.56498	0.28741
Q5BJF6	Outer dense fiber protein 2 OS=Homo sapiens OX=9606 GN=ODF2 PE=1 SV=1 - [ODFP2_HUMAN]	1.56212e+07	6.07183e+06	2.95044e+06	4.2226e+06	1.12928e+07	9.80034e+06	1.02728	0.96162
Q8TCJ2	Dolichyl-diphosphooligosaccharide--protein glycosyltransferase subunit STT3B OS=Homo sapiens OX=9606 GN=STT3B PE=1 SV=1 - [STT3B_HUMAN]	3.86349e+07	3.03754e+07	6.19984e+06	8.17791e+06	6.17625e+06	6.56608e+06	0.278157	0.137053
Q5T4S7	E3 ubiquitin-protein ligase UBR4 OS=Homo sapiens OX=9606 GN=UBR4 PE=1 SV=1 - [UBR4_HUMAN]	2.29629e+07	8.81177e+06	1.19591e+07	2.55213e+07	4.17855e+07	1.82514e+07	1.95635	0.163257
P11532	Dystrophin OS=Homo sapiens OX=9606 GN=DMD PE=1 SV=3 - [DMD_HUMAN]	9.10717e+07	7.91288e+07	6.75756e+07	1.26951e+08	9.5699e+07	8.45558e+07	1.292	0.183013
Q7Z2Z2	Elongation factor-like GTPase 1 OS=Homo sapiens OX=9606 GN=EFL1 PE=1 SV=2 - [EFL1_HUMAN]	1.62676e+07	5.91071e+06	9.01627e+06	6.40515e+06	1.62485e+07	9.9461e+06	1.04504	0.916725
O60502	Protein O-GlcNAcase OS=Homo sapiens OX=9606 GN=OGA PE=1 SV=2 - [OGA_HUMAN]	8.59163e+06	5.72562e+06	2.87653e+06	8.85647e+06	2.41363e+07	1.27253e+07	2.65899	0.12286
Q9HCJ0	Trinucleotide repeat-containing gene 6C protein OS=Homo sapiens OX=9606 GN=TNRC6C PE=1 SV=3 - [TNR6C_HUMAN]	1.17764e+07	6.16855e+06	6.90304e+06	8.14114e+06	2.7097e+06	7.76794e+06	0.749306	0.450037
Q8N163	Cell cycle and apoptosis regulator protein 2 OS=Homo sapiens OX=9606 GN=CCAR2 PE=1 SV=2 - [CCAR2_HUMAN]	6.56062e+06	9.59865e+06	9.49015e+06	5.43105e+06	9.24217e+06	2.18814e+07	1.42516	0.513037
P53708	Integrin alpha-8 OS=Homo sapiens OX=9606 GN=ITGA8 PE=1 SV=3 - [ITA8_HUMAN]	1.85974e+07	3.78877e+06	6.49141e+06	5.78145e+06	6.99795e+06	3.63418e+06	0.568384	0.422839
Q8IXQ6	Protein mono-ADP-ribosyltransferase PARP9 OS=Homo sapiens OX=9606 GN=PARP9 PE=1 SV=2 - [PARP9_HUMAN]	4.59585e+06	1.11134e+07	8.32258e+06	7.24272e+06	5.75626e+06	8.65259e+06	0.900953	0.720338
Q9P265	Disco-interacting protein 2 homolog B OS=Homo sapiens OX=9606 GN=DIP2B PE=1 SV=3 - [DIP2B_HUMAN]	1.03613e+07	1.33349e+07	4.02261e+06	3.55915e+06	6.47837e+06	4.35186e+06	0.51912	0.197894
A5YKK6	CCR4-NOT transcription complex subunit 1 OS=Homo sapiens OX=9606 GN=CNOT1 PE=1 SV=2 - [CNOT1_HUMAN]	6.68919e+06	7.3017e+06	2.82555e+06	5.47072e+06	4.67716e+06	6.17925e+06	0.970903	0.916817
Q8NCE2	Myotubularin-related protein 14 OS=Homo sapiens OX=9606 GN=MTMR14 PE=1 SV=2 - [MTMRE_HUMAN]	1.05402e+07	7.57597e+06	1.88875e+06	1.16692e+07	5.51107e+06	8.89153e+06	1.30327	0.549836
Q8IYS1	Xaa-Arg dipeptidase OS=Homo sapiens OX=9606 GN=PM20D2 PE=1 SV=2 - [P20D2_HUMAN]	5.06946e+06	2.17152e+07	4.56569e+06	8.34858e+06	1.62383e+07	2.76658e+07	1.66674	0.430246
P26358	DNA (cytosine-5)-methyltransferase 1 OS=Homo sapiens OX=9606 GN=DNMT1 PE=1 SV=2 - [DNMT1_HUMAN]	2.42957e+07	1.08298e+07	4.53101e+06	4.44753e+07	5.13549e+07	4.15746e+07	3.46487	0.00746741
Q96SU4	Oxysterol-binding protein-related protein 9 OS=Homo sapiens OX=9606 GN=OSBPL9 PE=1 SV=2 - [OSBL9_HUMAN]	9.84596e+06	1.0334e+07	9.12441e+06	2.21423e+07	3.13204e+07	1.76211e+07	2.4257	0.0262324
Q15477	Helicase SKI2W OS=Homo sapiens OX=9606 GN=SKIV2L PE=1 SV=3 - [SKIV2_HUMAN]	3.86356e+06	6.2007e+06	6.48871e+06	4.31282e+06	5.70937e+06	5.88863e+06	0.961206	0.835993
Q86VM9	Zinc finger CCCH domain-containing protein 18 OS=Homo sapiens OX=9606 GN=ZC3H18 PE=1 SV=2 - [ZCH18_HUMAN]	4.95825e+06	6.25986e+06	4.7632e+06	8.96517e+06	7.38671e+06	1.14465e+07	1.73943	0.0362969
Q02241	Kinesin-like protein KIF23 OS=Homo sapiens OX=9606 GN=KIF23 PE=1 SV=3 - [KIF23_HUMAN]	1.92199e+07	5.63428e+06	2.7329e+06	5.08036e+06	5.7422e+07	4.88481e+07	4.03632	0.175573
Q9Y5Q9	General transcription factor 3C polypeptide 3 OS=Homo sapiens OX=9606 GN=GTF3C3 PE=1 SV=1 - [TF3C3_HUMAN]	9.74412e+06	1.26357e+07	4.00953e+06	8.89646e+06	6.10729e+06	1.03469e+07	0.960642	0.908328
O43592	Exportin-T OS=Homo sapiens OX=9606 GN=XPOT PE=1 SV=2 - [XPOT_HUMAN]	4.96926e+06	9.61396e+06	7.21516e+06	7.39439e+06	3.54799e+07	3.87913e+06	2.14481	0.455978
Q9BXB4	Oxysterol-binding protein-related protein 11 OS=Homo sapiens OX=9606 GN=OSBPL11 PE=1 SV=2 - [OSB11_HUMAN]	4.35759e+06	3.37721e+06	5.24496e+06	3.95836e+07	1.09104e+07	6.18268e+06	4.36654	0.235784
P42285	Exosome RNA helicase MTR4 OS=Homo sapiens OX=9606 GN=MTREX PE=1 SV=3 - [MTREX_HUMAN]	1.58381e+07	1.05959e+07	9.50793e+06	1.18534e+07	4.65152e+07	3.80536e+06	1.72985	0.545301
Q6ZUT9	DENN domain-containing protein 5B OS=Homo sapiens OX=9606 GN=DENND5B PE=1 SV=2 - [DEN5B_HUMAN]	6.59755e+06	9.6073e+06	6.679e+06	8.16658e+06	1.30686e+07	5.47452e+06	1.16718	0.627928
Q96PE3	Inositol polyphosphate-4-phosphatase type I A OS=Homo sapiens OX=9606 GN=INPP4A PE=1 SV=1 - [INP4A_HUMAN]	8.98633e+06	5.95719e+06	1.19135e+07	1.94181e+07	3.29147e+06	5.43331e+06	1.04788	0.939893
O95785	Protein Wiz OS=Homo sapiens OX=9606 GN=WIZ PE=1 SV=2 - [WIZ_HUMAN]	4.8822e+06	3.99344e+06	5.73793e+06	6.74459e+06	4.70447e+06	3.55957e+07	3.21925	0.339953
P0DP91	Chimeric ERCC6-PGBD3 protein OS=Homo sapiens OX=9606 GN=ERCC6 PE=1 SV=1 - [ERPG3_HUMAN]	1.1365e+07	2.36253e+06	5.63858e+06	4.29462e+06	1.49921e+07	4.63102e+06	1.23503	0.746903
Q9UQE7	Structural maintenance of chromosomes protein 3 OS=Homo sapiens OX=9606 GN=SMC3 PE=1 SV=2 - [SMC3_HUMAN]	6.92892e+06	2.75477e+06	1.66348e+07	1.07878e+07	8.91251e+06	5.72879e+06	0.966208	0.949154
Q14204	Cytoplasmic dynein 1 heavy chain 1 OS=Homo sapiens OX=9606 GN=DYNC1H1 PE=1 SV=5 - [DYHC1_HUMAN]	1.17202e+07	1.76835e+07	3.94502e+06	2.36396e+07	1.71856e+07	1.14751e+07	1.56828	0.299743
Q9Y5B6	PAX3- and PAX7-binding protein 1 OS=Homo sapiens OX=9606 GN=PAXBP1 PE=1 SV=2 - [PAXB1_HUMAN]	9.38028e+06	9.47766e+06	5.17096e+06	1.4932e+07	2.70046e+07	1.04536e+07	2.1803	0.139864
Q14202	Zinc finger MYM-type protein 3 OS=Homo sapiens OX=9606 GN=ZMYM3 PE=1 SV=2 - [ZMYM3_HUMAN]	2.09842e+07	9.16943e+06	7.54872e+06	1.29209e+07	3.74562e+07	1.93617e+07	1.84972	0.276276
Q5VZ66	Janus kinase and microtubule-interacting protein 3 OS=Homo sapiens OX=9606 GN=JAKMIP3 PE=2 SV=2 - [JKIP3_HUMAN]	1.30198e+07	2.73006e+06	6.0984e+06	7.87364e+06	1.07378e+07	8.44344e+06	1.23831	0.611283
Q92620	Pre-mRNA-splicing factor ATP-dependent RNA helicase PRP16 OS=Homo sapiens OX=9606 GN=DHX38 PE=1 SV=2 - [PRP16_HUMAN]	7.40208e+06	4.85117e+06	4.55589e+06	9.39134e+06	8.51279e+06	7.79382e+06	1.52881	0.0432529
Q08188	Protein-glutamine gamma-glutamyltransferase E OS=Homo sapiens OX=9606 GN=TGM3 PE=1 SV=4 - [TGM3_HUMAN]	7.57215e+07	7.01675e+07	5.82922e+07	7.11533e+06	3.36389e+06	1.18575e+07	0.109397	0.000442062
P46977	Dolichyl-diphosphooligosaccharide--protein glycosyltransferase subunit STT3A OS=Homo sapiens OX=9606 GN=STT3A PE=1 SV=2 - [STT3A_HUMAN]	1.20381e+07	3.44029e+06	4.29254e+06	5.56481e+06	1.58414e+07	7.96145e+06	1.4854	0.482545
Q9H3U1	Protein unc-45 homolog A OS=Homo sapiens OX=9606 GN=UNC45A PE=1 SV=1 - [UN45A_HUMAN]	1.07222e+07	4.85049e+06	2.74448e+06	2.33578e+07	1.01847e+07	9.33747e+06	2.34097	0.185596
Q8IXB1	DnaJ homolog subfamily C member 10 OS=Homo sapiens OX=9606 GN=DNAJC10 PE=1 SV=2 - [DJC10_HUMAN]	5.05788e+06	8.75636e+06	7.20916e+06	1.58063e+07	9.64868e+06	1.41196e+07	1.88241	0.0438117
Q13370	cGMP-inhibited 3',5'-cyclic phosphodiesterase B OS=Homo sapiens OX=9606 GN=PDE3B PE=1 SV=2 - [PDE3B_HUMAN]	2.52329e+07	9.58602e+06	5.07016e+06	2.64989e+06	1.00208e+07	5.62609e+06	0.458693	0.328515
Q9NZB2	Constitutive coactivator of PPAR-gamma-like protein 1 OS=Homo sapiens OX=9606 GN=FAM120A PE=1 SV=2 - [F120A_HUMAN]	3.75583e+06	2.9611e+06	3.84486e+06	1.44003e+07	1.28281e+07	1.81718e+07	4.29854	0.00196004
Q02297	Pro-neuregulin-1, membrane-bound isoform OS=Homo sapiens OX=9606 GN=NRG1 PE=1 SV=3 - [NRG1_HUMAN]	9.58934e+06	5.11215e+06	9.13327e+06	3.05047e+06	4.13943e+06	1.44704e+07	0.908769	0.861846
Q9UPZ3	Hermansky-Pudlak syndrome 5 protein OS=Homo sapiens OX=9606 GN=HPS5 PE=1 SV=2 - [HPS5_HUMAN]	1.06356e+07	9.91719e+06	3.92021e+06	1.13824e+07	7.68866e+06	1.24531e+07	1.28812	0.412494
Q12756	Kinesin-like protein KIF1A OS=Homo sapiens OX=9606 GN=KIF1A PE=1 SV=2 - [KIF1A_HUMAN]	7.48152e+06	8.1547e+06	4.27087e+06	4.83204e+06	1.08787e+07	6.09375e+06	1.09531	0.787757
Q9BZF1	Oxysterol-binding protein-related protein 8 OS=Homo sapiens OX=9606 GN=OSBPL8 PE=1 SV=3 - [OSBL8_HUMAN]	5.84836e+06	7.17178e+06	1.12803e+07	2.13628e+07	9.52772e+06	5.28364e+06	1.48862	0.479538
Q96MU7	YTH domain-containing protein 1 OS=Homo sapiens OX=9606 GN=YTHDC1 PE=1 SV=3 - [YTDC1_HUMAN]	1.30903e+07	2.31162e+07	3.91153e+06	2.06552e+07	7.96366e+06	1.08163e+07	0.982976	0.974703
Q5GLZ8	Probable E3 ubiquitin-protein ligase HERC4 OS=Homo sapiens OX=9606 GN=HERC4 PE=1 SV=1 - [HERC4_HUMAN]	8.18244e+06	4.37333e+06	1.18584e+07	1.07259e+07	1.21504e+07	1.0324e+07	1.35988	0.259476
Q5JTZ9	Alanine--tRNA ligase, mitochondrial OS=Homo sapiens OX=9606 GN=AARS2 PE=1 SV=1 - [SYAM_HUMAN]	9.63665e+06	2.14757e+07	5.55479e+06	1.48628e+07	1.30777e+07	8.81788e+06	1.00249	0.99553
Q96RP9	Elongation factor G, mitochondrial OS=Homo sapiens OX=9606 GN=GFM1 PE=1 SV=2 - [EFGM_HUMAN]	7.13855e+06	9.88905e+06	4.18008e+06	8.2137e+06	1.79764e+07	9.64333e+06	1.68964	0.231807
Q7Z4V5	Hepatoma-derived growth factor-related protein 2 OS=Homo sapiens OX=9606 GN=HDGFL2 PE=1 SV=1 - [HDGR2_HUMAN]	8.45164e+06	6.96263e+06	1.0242e+07	5.85728e+06	1.72549e+07	8.89399e+06	1.2475	0.581814
Q9BSJ8	Extended synaptotagmin-1 OS=Homo sapiens OX=9606 GN=ESYT1 PE=1 SV=1 - [ESYT1_HUMAN]	9.41285e+06	4.49784e+06	1.09059e+07	2.27569e+07	7.80301e+06	2.80345e+07	2.3611	0.151412
Q14692	Ribosome biogenesis protein BMS1 homolog OS=Homo sapiens OX=9606 GN=BMS1 PE=1 SV=1 - [BMS1_HUMAN]	6.07225e+06	4.27413e+06	4.56885e+06	3.31942e+06	3.25014e+07	1.04689e+07	3.10352	0.300371
Q7Z460	CLIP-associating protein 1 OS=Homo sapiens OX=9606 GN=CLASP1 PE=1 SV=1 - [CLAP1_HUMAN]	6.55153e+06	4.696e+06	5.54709e+06	7.35248e+06	1.10313e+07	7.99075e+06	1.57042	0.0637141
Q15046	Lysine--tRNA ligase OS=Homo sapiens OX=9606 GN=KARS1 PE=1 SV=3 - [SYK_HUMAN]	6.35826e+06	8.90325e+06	3.17318e+06	8.01683e+06	7.68226e+06	5.35071e+06	1.14186	0.663315
Q9BWT7	Caspase recruitment domain-containing protein 10 OS=Homo sapiens OX=9606 GN=CARD10 PE=1 SV=2 - [CAR10_HUMAN]	2.42508e+06	2.45535e+06	6.98631e+06	4.54183e+08	4.62635e+08	4.53209e+08	115.451	1.80852e-08
Q02040	A-kinase anchor protein 17A OS=Homo sapiens OX=9606 GN=AKAP17A PE=1 SV=2 - [AK17A_HUMAN]	1.23029e+07	1.1365e+07	4.99828e+06	2.76658e+07	6.72499e+06	1.18239e+07	1.61216	0.432496
Q5BJE1	Coiled-coil domain-containing protein 178 OS=Homo sapiens OX=9606 GN=CCDC178 PE=2 SV=3 - [CC178_HUMAN]	1.04667e+07	1.16415e+08	8.62743e+06	5.80876e+06	1.2585e+07	4.01815e+06	0.165391	0.350792
Q8WXH0	Nesprin-2 OS=Homo sapiens OX=9606 GN=SYNE2 PE=1 SV=3 - [SYNE2_HUMAN]	4.26259e+06	6.21361e+06	3.55249e+06	1.16264e+07	6.55925e+06	2.07614e+07	2.77624	0.121113
O60566	Mitotic checkpoint serine/threonine-protein kinase BUB1 beta OS=Homo sapiens OX=9606 GN=BUB1B PE=1 SV=3 - [BUB1B_HUMAN]	5.11534e+06	4.88491e+06	4.46863e+06	4.39917e+06	8.51102e+06	7.52156e+06	1.41212	0.187984
Q8N3U4	Cohesin subunit SA-2 OS=Homo sapiens OX=9606 GN=STAG2 PE=1 SV=3 - [STAG2_HUMAN]	3.91037e+07	3.89961e+06	5.18424e+06	1.18343e+08	6.43987e+06	7.41544e+06	2.74342	0.511282
Q8WVB6	Chromosome transmission fidelity protein 18 homolog OS=Homo sapiens OX=9606 GN=CHTF18 PE=1 SV=1 - [CTF18_HUMAN]	5.02468e+06	1.05453e+07	3.54069e+06	6.76566e+06	1.415e+07	8.49334e+06	1.53888	0.328118
Q08378	Golgin subfamily A member 3 OS=Homo sapiens OX=9606 GN=GOLGA3 PE=1 SV=2 - [GOGA3_HUMAN]	6.11703e+06	9.00905e+08	2.49015e+06	4.65733e+07	1.96806e+08	7.1549e+06	0.27546	0.510463
O60318	Germinal-center associated nuclear protein OS=Homo sapiens OX=9606 GN=MCM3AP PE=1 SV=2 - [GANP_HUMAN]	1.03879e+07	7.25377e+06	2.85864e+06	8.54352e+06	3.69892e+07	5.11074e+06	2.47037	0.386045
Q9UPU5	Ubiquitin carboxyl-terminal hydrolase 24 OS=Homo sapiens OX=9606 GN=USP24 PE=1 SV=3 - [UBP24_HUMAN]	1.92159e+07	7.38517e+06	2.87354e+06	6.83116e+06	2.15189e+07	8.57497e+06	1.25277	0.730577
Q8N201	Integrator complex subunit 1 OS=Homo sapiens OX=9606 GN=INTS1 PE=1 SV=2 - [INT1_HUMAN]	7.16681e+06	7.62867e+06	2.5914e+06	3.15448e+07	1.17569e+07	6.89586e+06	2.88709	0.2289
P78364	Polyhomeotic-like protein 1 OS=Homo sapiens OX=9606 GN=PHC1 PE=1 SV=3 - [PHC1_HUMAN]	7.68706e+06	6.43273e+06	5.65698e+06	6.63378e+06	6.80787e+07	2.03229e+07	4.8054	0.249442
O43747	AP-1 complex subunit gamma-1 OS=Homo sapiens OX=9606 GN=AP1G1 PE=1 SV=5 - [AP1G1_HUMAN]	3.9431e+06	3.97025e+06	4.04442e+06	1.22307e+07	1.05841e+07	1.93952e+07	3.52993	0.0203302
Q9HCM4	Band 4.1-like protein 5 OS=Homo sapiens OX=9606 GN=EPB41L5 PE=1 SV=3 - [E41L5_HUMAN]	1.1115e+07	1.23268e+07	9.8603e+06	1.81618e+07	6.76238e+06	1.51404e+07	1.20306	0.552805
P13807	Glycogen [starch] synthase, muscle OS=Homo sapiens OX=9606 GN=GYS1 PE=1 SV=2 - [GYS1_HUMAN]	9.24858e+06	1.53603e+07	8.16205e+06	1.08991e+07	1.24341e+07	1.06312e+07	1.03642	0.871613
Q14008	Cytoskeleton-associated protein 5 OS=Homo sapiens OX=9606 GN=CKAP5 PE=1 SV=3 - [CKAP5_HUMAN]	1.73496e+07	7.16085e+06	2.87953e+06	3.94584e+06	3.43403e+07	1.1964e+07	1.83462	0.490796
Q14C86	GTPase-activating protein and VPS9 domain-containing protein 1 OS=Homo sapiens OX=9606 GN=GAPVD1 PE=1 SV=2 - [GAPD1_HUMAN]	1.02605e+07	1.96987e+07	7.88949e+06	1.08208e+07	4.21725e+07	3.21742e+07	2.25021	0.187207
P42224	Signal transducer and activator of transcription 1-alpha/beta OS=Homo sapiens OX=9606 GN=STAT1 PE=1 SV=2 - [STAT1_HUMAN]	2.1649e+07	1.16692e+07	3.69489e+06	7.72322e+07	9.04883e+06	1.1974e+07	2.6546	0.422221
Q8TCY9	Up-regulator of cell proliferation OS=Homo sapiens OX=9606 GN=URGCP PE=1 SV=2 - [URGCP_HUMAN]	6.37017e+06	2.39667e+06	7.53147e+06	9.41154e+06	7.30321e+06	6.89395e+06	1.44854	0.233822
Q9P275	Ubiquitin carboxyl-terminal hydrolase 36 OS=Homo sapiens OX=9606 GN=USP36 PE=1 SV=4 - [UBP36_HUMAN]	1.37098e+07	5.7066e+06	9.39069e+06	6.06762e+06	1.11628e+07	8.67541e+06	0.899289	0.742027
Q7Z3K3	Pogo transposable element with ZNF domain OS=Homo sapiens OX=9606 GN=POGZ PE=1 SV=2 - [POGZ_HUMAN]	1.21226e+07	1.20673e+07	1.46044e+07	5.45131e+07	6.8217e+06	6.95298e+06	1.76025	0.569778
Q96QC0	Serine/threonine-protein phosphatase 1 regulatory subunit 10 OS=Homo sapiens OX=9606 GN=PPP1R10 PE=1 SV=1 - [PP1RA_HUMAN]	7.64508e+06	6.61037e+06	2.42979e+06	1.50431e+07	1.07968e+07	9.83164e+06	2.13791	0.0487436
Q6P1N0	Coiled-coil and C2 domain-containing protein 1A OS=Homo sapiens OX=9606 GN=CC2D1A PE=1 SV=1 - [C2D1A_HUMAN]	6.15446e+06	3.50383e+06	5.85322e+06	7.24172e+06	9.48161e+06	6.66684e+07	5.37612	0.309674
O95104	SR-related and CTD-associated factor 4 OS=Homo sapiens OX=9606 GN=SCAF4 PE=1 SV=3 - [SCAF4_HUMAN]	8.70975e+06	1.90281e+06	6.31346e+06	2.38937e+06	2.27727e+07	4.95379e+06	1.77926	0.548245
Q9H0E3	Histone deacetylase complex subunit SAP130 OS=Homo sapiens OX=9606 GN=SAP130 PE=1 SV=1 - [SP130_HUMAN]	1.22808e+07	6.03742e+06	6.60579e+06	6.70033e+06	9.1143e+06	3.99115e+07	2.23584	0.398564
P57678	Gem-associated protein 4 OS=Homo sapiens OX=9606 GN=GEMIN4 PE=1 SV=2 - [GEMI4_HUMAN]	1.23217e+07	6.53158e+06	6.87105e+06	5.7161e+06	9.86235e+06	5.97373e+06	0.837812	0.578999
Q9Y4C8	Probable RNA-binding protein 19 OS=Homo sapiens OX=9606 GN=RBM19 PE=1 SV=3 - [RBM19_HUMAN]	1.25937e+07	5.76904e+06	5.26499e+06	8.68744e+06	4.76254e+06	1.30369e+07	1.12101	0.790814
Q9UPQ0	LIM and calponin homology domains-containing protein 1 OS=Homo sapiens OX=9606 GN=LIMCH1 PE=1 SV=4 - [LIMC1_HUMAN]	4.51627e+06	8.34858e+06	5.13488e+06	1.15061e+07	3.65407e+07	5.10366e+06	2.95285	0.2921
O00203	AP-3 complex subunit beta-1 OS=Homo sapiens OX=9606 GN=AP3B1 PE=1 SV=3 - [AP3B1_HUMAN]	1.56071e+07	9.79762e+06	4.44176e+06	1.18732e+07	1.68506e+07	7.28198e+06	1.20637	0.653992
Q9NS87	Kinesin-like protein KIF15 OS=Homo sapiens OX=9606 GN=KIF15 PE=1 SV=1 - [KIF15_HUMAN]	1.15838e+07	4.69535e+06	8.51692e+06	2.17393e+07	3.61477e+07	7.69399e+06	2.64482	0.183022
O14795	Protein unc-13 homolog B OS=Homo sapiens OX=9606 GN=UNC13B PE=1 SV=2 - [UN13B_HUMAN]	4.31431e+06	5.28317e+07	6.09249e+06	1.16676e+07	1.22833e+07	4.74146e+06	0.453717	0.513183
P17655	Calpain-2 catalytic subunit OS=Homo sapiens OX=9606 GN=CAPN2 PE=1 SV=6 - [CAN2_HUMAN]	4.51001e+06	2.31599e+06	7.46132e+06	4.84075e+06	5.17947e+07	2.78409e+07	5.91267	0.161372
Q92900	Regulator of nonsense transcripts 1 OS=Homo sapiens OX=9606 GN=UPF1 PE=1 SV=2 - [RENT1_HUMAN]	6.21016e+06	5.29721e+06	9.96128e+06	6.70637e+06	3.72575e+06	1.24479e+07	1.06574	0.880239
Q8N1G0	Zinc finger protein 687 OS=Homo sapiens OX=9606 GN=ZNF687 PE=1 SV=1 - [ZN687_HUMAN]	6.05544e+06	4.36606e+06	5.3652e+06	6.4068e+07	8.34379e+07	1.10827e+07	10.0457	0.0925941
P35251	Replication factor C subunit 1 OS=Homo sapiens OX=9606 GN=RFC1 PE=1 SV=4 - [RFC1_HUMAN]	1.04464e+07	7.71749e+06	4.68624e+06	1.09339e+07	1.21395e+07	2.51251e+06	1.11972	0.804867
P12111	Collagen alpha-3(VI) chain OS=Homo sapiens OX=9606 GN=COL6A3 PE=1 SV=5 - [CO6A3_HUMAN]	1.29379e+07	4.12911e+06	5.55132e+06	8.46278e+06	8.97015e+06	8.60414e+06	1.15115	0.698256
O95602	DNA-directed RNA polymerase I subunit RPA1 OS=Homo sapiens OX=9606 GN=POLR1A PE=1 SV=2 - [RPA1_HUMAN]	7.23921e+06	9.98686e+06	9.03254e+06	1.75346e+07	1.53965e+07	5.29133e+06	1.45562	0.359959
Q8N568	Serine/threonine-protein kinase DCLK2 OS=Homo sapiens OX=9606 GN=DCLK2 PE=1 SV=4 - [DCLK2_HUMAN]	9.84459e+06	8.07147e+06	6.26203e+06	1.04507e+07	1.05387e+07	354592	0.882785	0.802491
Q9NXH9	tRNA (guanine(26)-N(2))-dimethyltransferase OS=Homo sapiens OX=9606 GN=TRMT1 PE=1 SV=1 - [TRM1_HUMAN]	3.95899e+06	1.2135e+08	3.54388e+06	8.60235e+06	1.38166e+07	1.1292e+07	0.261624	0.464175
Q9Y2A7	Nck-associated protein 1 OS=Homo sapiens OX=9606 GN=NCKAP1 PE=1 SV=1 - [NCKP1_HUMAN]	4.0447e+06	2.79013e+06	9.69292e+06	6.72033e+06	4.54831e+06	8.80139e+06	1.21432	0.655344
Q460N5	Protein mono-ADP-ribosyltransferase PARP14 OS=Homo sapiens OX=9606 GN=PARP14 PE=1 SV=3 - [PAR14_HUMAN]	1.42939e+07	2.37632e+06	1.82779e+07	1.85408e+07	1.9636e+07	3.58838e+06	1.19506	0.763155
P23458	Tyrosine-protein kinase JAK1 OS=Homo sapiens OX=9606 GN=JAK1 PE=1 SV=2 - [JAK1_HUMAN]	4.06127e+06	2.24409e+06	5.40766e+07	1.30686e+07	8.97699e+06	1.02947e+07	0.535596	0.612204
Q9ULD2	Microtubule-associated tumor suppressor 1 OS=Homo sapiens OX=9606 GN=MTUS1 PE=1 SV=2 - [MTUS1_HUMAN]	7.15292e+06	2.01801e+06	4.65581e+06	2.49252e+07	8.72607e+06	6.25076e+06	2.88586	0.22359
Q9H2E6	Semaphorin-6A OS=Homo sapiens OX=9606 GN=SEMA6A PE=1 SV=3 - [SEM6A_HUMAN]	1.01136e+07	5.29317e+06	2.49689e+06	1.48669e+07	4.48881e+06	1.26752e+07	1.78906	0.289798
O95163	Elongator complex protein 1 OS=Homo sapiens OX=9606 GN=ELP1 PE=1 SV=3 - [ELP1_HUMAN]	1.22731e+07	1.16288e+07	2.50851e+06	7.79653e+06	7.47323e+06	4.05753e+07	2.11451	0.438852
Q9BXW9	Fanconi anemia group D2 protein OS=Homo sapiens OX=9606 GN=FANCD2 PE=1 SV=2 - [FACD2_HUMAN]	8.29092e+06	1.63493e+06	3.82201e+06	7.10794e+06	9.08151e+06	1.28994e+07	2.11588	0.119929
Q9NVI1	Fanconi anemia group I protein OS=Homo sapiens OX=9606 GN=FANCI PE=1 SV=4 - [FANCI_HUMAN]	9.82687e+06	3.60408e+06	3.41771e+06	3.51185e+06	2.06366e+07	4.74245e+06	1.71473	0.533825
Q92922	SWI/SNF complex subunit SMARCC1 OS=Homo sapiens OX=9606 GN=SMARCC1 PE=1 SV=3 - [SMRC1_HUMAN]	1.35145e+07	6.41803e+06	3.95624e+06	8.02517e+06	5.07886e+07	1.04254e+07	2.8984	0.346
Q9P227	Rho GTPase-activating protein 23 OS=Homo sapiens OX=9606 GN=ARHGAP23 PE=1 SV=2 - [RHG23_HUMAN]	1.26462e+07	7.24925e+06	4.55273e+06	6.07899e+06	3.29375e+06	1.34258e+07	0.932524	0.893229
B2RC85	Radial spoke head 10 homolog B2 OS=Homo sapiens OX=9606 GN=RSPH10B2 PE=2 SV=2 - [R10B2_HUMAN]	1.74449e+07	1.45718e+08	3.87214e+06	9.49015e+06	1.40952e+07	1.0557e+07	0.204403	0.382667
Q16531	DNA damage-binding protein 1 OS=Homo sapiens OX=9606 GN=DDB1 PE=1 SV=1 - [DDB1_HUMAN]	4.25492e+06	6.91309e+06	9.85757e+06	6.10644e+06	2.22084e+07	9.11303e+06	1.78011	0.352476
O43847	Nardilysin OS=Homo sapiens OX=9606 GN=NRDC PE=1 SV=3 - [NRDC_HUMAN]	1.27695e+07	4.14833e+06	4.66647e+06	7.38824e+06	5.76504e+06	1.27589e+07	1.20051	0.701433
Q9P206	Uncharacterized protein KIAA1522 OS=Homo sapiens OX=9606 GN=KIAA1522 PE=1 SV=2 - [K1522_HUMAN]	5.53173e+06	6.99019e+06	1.08892e+07	1.95261e+07	1.39901e+07	1.28753e+07	1.98159	0.0423705
O14646	Chromodomain-helicase-DNA-binding protein 1 OS=Homo sapiens OX=9606 GN=CHD1 PE=1 SV=2 - [CHD1_HUMAN]	7.33772e+06	7.45822e+06	6.86724e+06	6.01444e+06	4.12331e+07	3.63789e+07	3.8603	0.134206
Q8NHH1	Tubulin polyglutamylase TTLL11 OS=Homo sapiens OX=9606 GN=TTLL11 PE=1 SV=2 - [TTL11_HUMAN]	1.34752e+07	6.63976e+06	1.4292e+07	3.36179e+06	6.39893e+06	8.36828e+06	0.526901	0.127622
Q8IX01	SURP and G-patch domain-containing protein 2 OS=Homo sapiens OX=9606 GN=SUGP2 PE=1 SV=2 - [SUGP2_HUMAN]	8.12142e+06	8.68383e+06	7.37034e+06	1.86065e+07	2.18495e+07	6.1407e+07	4.21347	0.133053
Q7Z570	Zinc finger protein 804A OS=Homo sapiens OX=9606 GN=ZNF804A PE=2 SV=3 - [Z804A_HUMAN]	6.7821e+06	9.74952e+06	8.10342e+06	2.26201e+07	1.28263e+07	6.38785e+06	1.69816	0.298006
Q6KC79	Nipped-B-like protein OS=Homo sapiens OX=9606 GN=NIPBL PE=1 SV=2 - [NIPBL_HUMAN]	2.69503e+07	8.37292e+06	4.88423e+06	4.29105e+06	9.36274e+06	4.96857e+06	0.463157	0.363968
Q9NQX4	Unconventional myosin-Vc OS=Homo sapiens OX=9606 GN=MYO5C PE=1 SV=2 - [MYO5C_HUMAN]	6.41714e+06	2.19486e+06	5.78105e+06	5.05612e+06	1.28967e+07	1.14346e+07	2.04178	0.142476
Q9NWH9	SAFB-like transcription modulator OS=Homo sapiens OX=9606 GN=SLTM PE=1 SV=2 - [SLTM_HUMAN]	7.69986e+06	1.87528e+07	2.56513e+06	7.76955e+06	2.23923e+07	1.20748e+07	1.45555	0.532169
A3KMH1	von Willebrand factor A domain-containing protein 8 OS=Homo sapiens OX=9606 GN=VWA8 PE=1 SV=2 - [VWA8_HUMAN]	5.3678e+06	9.9839e+07	7.36881e+06	9.73939e+06	1.02676e+07	7.11533e+06	0.240926	0.412604
Q9ULE4	Protein FAM184B OS=Homo sapiens OX=9606 GN=FAM184B PE=2 SV=3 - [F184B_HUMAN]	7.15837e+06	6.36342e+07	2.59517e+06	7.37392e+06	1.5987e+07	4.81565e+06	0.383941	0.491411
Q96N67	Dedicator of cytokinesis protein 7 OS=Homo sapiens OX=9606 GN=DOCK7 PE=1 SV=4 - [DOCK7_HUMAN]	4.56632e+06	5.44009e+06	5.78145e+06	9.08213e+06	1.37831e+07	2.03398e+07	2.7366	0.0496912
Q96MT7	Cilia- and flagella-associated protein 44 OS=Homo sapiens OX=9606 GN=CFAP44 PE=1 SV=2 - [CFA44_HUMAN]	1.46105e+07	2.71364e+06	8.61233e+07	2.8997e+07	7.64773e+06	5.37525e+06	0.406196	0.492152
P09884	DNA polymerase alpha catalytic subunit OS=Homo sapiens OX=9606 GN=POLA1 PE=1 SV=2 - [DPOLA_HUMAN]	3.30542e+06	5.55941e+06	3.19814e+06	2.00625e+07	1.2789e+07	1.33877e+07	3.83315	0.00973105
O60244	Mediator of RNA polymerase II transcription subunit 14 OS=Homo sapiens OX=9606 GN=MED14 PE=1 SV=2 - [MED14_HUMAN]	4.92434e+06	1.21258e+08	4.98651e+06	3.76156e+06	6.8525e+06	9.26462e+06	0.151551	0.393166
Q8IZH2	5'-3' exoribonuclease 1 OS=Homo sapiens OX=9606 GN=XRN1 PE=1 SV=1 - [XRN1_HUMAN]	7.51114e+06	5.12422e+06	2.56335e+06	5.67033e+06	1.34584e+07	3.74258e+06	1.50482	0.481059
O15027	Protein transport protein Sec16A OS=Homo sapiens OX=9606 GN=SEC16A PE=1 SV=4 - [SC16A_HUMAN]	1.01882e+07	1.42379e+06	4.98755e+06	1.37164e+07	9.09789e+06	6.80847e+06	1.78455	0.253341
Q9UKK3	Protein mono-ADP-ribosyltransferase PARP4 OS=Homo sapiens OX=9606 GN=PARP4 PE=1 SV=3 - [PARP4_HUMAN]	6.10136e+06	1.02648e+07	5.85972e+06	1.38502e+07	7.04027e+06	1.16449e+07	1.46385	0.235495
Q15648	Mediator of RNA polymerase II transcription subunit 1 OS=Homo sapiens OX=9606 GN=MED1 PE=1 SV=4 - [MED1_HUMAN]	8.71864e+07	3.99945e+07	4.69135e+07	5.05778e+07	3.0464e+07	4.35509e+07	0.715661	0.35664
O94979	Protein transport protein Sec31A OS=Homo sapiens OX=9606 GN=SEC31A PE=1 SV=3 - [SC31A_HUMAN]	9.06264e+06	3.46086e+06	2.83556e+06	5.14868e+07	1.89593e+07	3.24137e+07	6.69701	0.0389708
O15078	Centrosomal protein of 290 kDa OS=Homo sapiens OX=9606 GN=CEP290 PE=1 SV=2 - [CE290_HUMAN]	1.00487e+07	2.84067e+06	6.46915e+08	1.1704e+07	6.1217e+06	3.30581e+07	0.0771196	0.395911
Q99590	Protein SCAF11 OS=Homo sapiens OX=9606 GN=SCAF11 PE=1 SV=2 - [SCAFB_HUMAN]	6.54381e+06	2.02431e+06	4.30864e+06	2.76543e+07	7.68546e+06	7.78626e+06	3.34914	0.210436
Q14999	Cullin-7 OS=Homo sapiens OX=9606 GN=CUL7 PE=1 SV=2 - [CUL7_HUMAN]	9.23705e+06	5.56712e+06	2.10254e+06	4.85722e+06	1.20106e+07	7.82468e+06	1.46051	0.424884
Q9NZM1	Myoferlin OS=Homo sapiens OX=9606 GN=MYOF PE=1 SV=1 - [MYOF_HUMAN]	2.12094e+07	7.66206e+06	7.38773e+06	9.81802e+06	8.74544e+06	1.08553e+07	0.811347	0.646303
Q9UJF2	Ras GTPase-activating protein nGAP OS=Homo sapiens OX=9606 GN=RASAL2 PE=1 SV=2 - [NGAP_HUMAN]	1.6839e+07	3.54241e+06	3.97108e+06	9.08339e+06	1.26156e+07	9.39916e+06	1.277	0.643972
A6NHR9	Structural maintenance of chromosomes flexible hinge domain-containing protein 1 OS=Homo sapiens OX=9606 GN=SMCHD1 PE=1 SV=2 - [SMHD1_HUMAN]	1.67145e+07	2.29968e+06	5.60584e+06	4.05396e+06	5.09588e+06	8.32662e+06	0.709847	0.628058
Q86UP3	Zinc finger homeobox protein 4 OS=Homo sapiens OX=9606 GN=ZFHX4 PE=1 SV=1 - [ZFHX4_HUMAN]	1.61474e+07	1.00926e+07	7.73463e+06	6.97035e+06	7.90481e+06	1.31577e+07	0.825109	0.564804
Q12830	Nucleosome-remodeling factor subunit BPTF OS=Homo sapiens OX=9606 GN=BPTF PE=1 SV=3 - [BPTF_HUMAN]	4.30625e+06	4.18936e+06	1.42386e+07	9.50266e+06	1.33432e+07	1.07192e+07	1.47642	0.362776
Q13439	Golgin subfamily A member 4 OS=Homo sapiens OX=9606 GN=GOLGA4 PE=1 SV=1 - [GOGA4_HUMAN]	8.56368e+06	1.15469e+07	2.23431e+06	1.01459e+07	7.71588e+06	7.5828e+06	1.13872	0.736964
Q8IWZ3	Ankyrin repeat and KH domain-containing protein 1 OS=Homo sapiens OX=9606 GN=ANKHD1 PE=1 SV=1 - [ANKH1_HUMAN]	3.25133e+06	6.21189e+06	4.44453e+06	3.37276e+06	4.80265e+06	6.63286e+06	1.06475	0.825649
Q5S007	Leucine-rich repeat serine/threonine-protein kinase 2 OS=Homo sapiens OX=9606 GN=LRRK2 PE=1 SV=2 - [LRRK2_HUMAN]	7.40619e+06	4.62301e+06	5.03235e+06	8.98757e+06	8.77763e+06	5.02971e+08	30.5211	0.365658
Q5D862	Filaggrin-2 OS=Homo sapiens OX=9606 GN=FLG2 PE=1 SV=1 - [FILA2_HUMAN]	2.29624e+08	1.33439e+08	1.02199e+08	9.11475e+07	8.52443e+07	6.20015e+07	0.512386	0.127099
Q93008	Probable ubiquitin carboxyl-terminal hydrolase FAF-X OS=Homo sapiens OX=9606 GN=USP9X PE=1 SV=4 - [USP9X_HUMAN]	1.46399e+07	4.45656e+06	2.43265e+06	6.17968e+06	2.33254e+07	4.29969e+06	1.57019	0.597002
P04114	Apolipoprotein B-100 OS=Homo sapiens OX=9606 GN=APOB PE=1 SV=2 - [APOB_HUMAN]	1.75067e+07	4.9834e+06	2.04865e+08	5.43896e+06	2.50112e+08	9.42917e+06	1.16549	0.909442
Q9C0D2	Centrosomal protein of 295 kDa OS=Homo sapiens OX=9606 GN=CEP295 PE=1 SV=4 - [CE295_HUMAN]	5.47859e+07	4.29522e+06	1.36188e+07	1.29505e+07	9.76372e+06	1.19981e+07	0.477473	0.460906
Q9NRC6	Spectrin beta chain, non-erythrocytic 5 OS=Homo sapiens OX=9606 GN=SPTBN5 PE=1 SV=2 - [SPTN5_HUMAN]	7.15688e+06	3.64958e+06	2.79516e+06	6.59618e+06	5.36881e+07	1.02038e+07	5.18233	0.280007
Q8NDH2	Leucine-rich repeat transmembrane protein CCDC168 OS=Homo sapiens OX=9606 GN=CCDC168 PE=2 SV=3 - [CC168_HUMAN]	3.07023e+09	1.50891e+07	6.07183e+06	5.92055e+06	7.26283e+06	1.63899e+07	0.00956632	0.3736
Q9UIF8	Bromodomain adjacent to zinc finger domain protein 2B OS=Homo sapiens OX=9606 GN=BAZ2B PE=1 SV=3 - [BAZ2B_HUMAN]	1.1979e+07	7.75672e+09	6.66235e+06	7.5393e+06	1.28735e+07	5.57137e+06	0.00334186	0.373792
Q9UPN3	Microtubule-actin cross-linking factor 1, isoforms 1/2/3/5 OS=Homo sapiens OX=9606 GN=MACF1 PE=1 SV=4 - [MACF1_HUMAN]	1.22757e+07	2.02053e+06	4.10144e+06	5.47679e+06	1.80235e+08	1.72486e+08	19.4697	0.118264
Q8IZT6	Abnormal spindle-like microcephaly-associated protein OS=Homo sapiens OX=9606 GN=ASPM PE=1 SV=2 - [ASPM_HUMAN]	7.55762e+06	8.28558e+07	4.17921e+06	6.11067e+06	1.21327e+07	6.03742e+06	0.256688	0.414381
Q9Y6V0	Protein piccolo OS=Homo sapiens OX=9606 GN=PCLO PE=1 SV=5 - [PCLO_HUMAN]	2.65738e+07	4.08018e+06	3.7405e+06	4.81298e+06	8.05191e+06	7.12965e+06	0.581331	0.562758
Q96JB1	Dynein axonemal heavy chain 8 OS=Homo sapiens OX=9606 GN=DNAH8 PE=1 SV=2 - [DYH8_HUMAN]	5.02259e+06	3.22194e+06	4.60254e+06	8.56487e+06	8.18131e+06	6.43318e+06	1.80425	0.015585
O14686	Histone-lysine N-methyltransferase 2D OS=Homo sapiens OX=9606 GN=KMT2D PE=1 SV=2 - [KMT2D_HUMAN]	1.17357e+07	3.34066e+06	4.27769e+06	1.74074e+07	4.85713e+07	8.05917e+06	3.82545	0.21948
Q5VST9	Obscurin OS=Homo sapiens OX=9606 GN=OBSCN PE=1 SV=3 - [OBSCN_HUMAN]	5.53634e+06	5.06595e+06	2.07312e+07	1.91322e+07	7.09072e+06	9.11114e+06	1.12768	0.843948
Q8WZ42	Titin OS=Homo sapiens OX=9606 GN=TTN PE=1 SV=4 - [TITIN_HUMAN]	1.27545e+07	1.98629e+08	5.0786e+06	9.7793e+06	5.57678e+06	1.8628e+08	0.93151	0.957372
